# Supplementary material for: Single-cell transcription analysis of Plasmodium vivax blood-stage parasites identifies stage- and species-specific profiles of expression
Source: PLoS Biol. 2020 May 4;18(5):e3000711. doi: 10.1371/journal.pbio.3000711 (PMC7224573; doi:10.1371/journal.pbio.3000711)
Supplement: S18 Data — (XLSX) [file pbio.3000711.s047.xlsx]

## Sheet: Sheet1
GEM	NumReads	NumInOrtho	Type	Rank
AMRU_Ao_AAACCTGAGCTCAACT	10701	8155	Asexual	1415
AMRU_Ao_AAACCTGAGTTGAGAT	14407	10010	Asexual	4807
AMRU_Ao_AAACCTGGTCAATACC	11283	8884	Asexual	2837
AMRU_Ao_AAACCTGGTCATATCG	5362	4123	Asexual	166
AMRU_Ao_AAACCTGTCTCGAGTA	15326	11695	Asexual	4005
AMRU_Ao_AAACGGGGTTACGGAG	8490	3526	Asexual	7194
AMRU_Ao_AAACGGGGTTATCCGA	6727	5051	Asexual	37
AMRU_Ao_AAAGATGAGGTGCACA	36981	27442	Asexual	4376
AMRU_Ao_AAAGATGCAGTCGATT	10785	8448	Asexual	2337
AMRU_Ao_AAAGATGCATCGTCGG	13357	9395	Asexual	4879
AMRU_Ao_AAAGATGCATGGATGG	9295	7595	Asexual	1249
AMRU_Ao_AAAGATGGTGCTCTTC	25603	21410	Female	8875
AMRU_Ao_AAAGATGTCATGCTCC	27355	22592	Female	8389
AMRU_Ao_AAAGATGTCTCCTATA	29801	24917	Female	8795
AMRU_Ao_AAAGCAAAGACACTAA	14388	10915	Asexual	4506
AMRU_Ao_AAAGCAAGTTAAGTAG	11670	9706	Female	8768
AMRU_Ao_AAAGCAATCATCTGCC	21513	16904	Asexual	3378
AMRU_Ao_AAAGTAGAGCTACCGC	16832	11818	Asexual	5165
AMRU_Ao_AAAGTAGGTGGCAAAC	37044	30908	Female	8614
AMRU_Ao_AAAGTAGGTGTCAATC	4593	3676	Asexual	4660
AMRU_Ao_AAATGCCAGCCAGGAT	7441	5641	Asexual	2440
AMRU_Ao_AAATGCCCATAGACTC	9588	7219	Asexual	5948
AMRU_Ao_AAATGCCGTAGGCTGA	16111	10941	Asexual	5389
AMRU_Ao_AAATGCCGTCCCTTGT	13983	9055	Asexual	6021
AMRU_Ao_AAATGCCGTTGTGGCC	19685	14590	Asexual	3958
AMRU_Ao_AAATGCCTCGGTCTAA	6610	5052	Asexual	645
AMRU_Ao_AACACGTAGATATGGT	7034	5654	Asexual	1438
AMRU_Ao_AACACGTAGGTAGCCA	3765	2746	Asexual	6964
AMRU_Ao_AACACGTAGTCACGCC	10369	7714	Asexual	4637
AMRU_Ao_AACACGTGTCGGCACT	13650	8593	Asexual	6260
AMRU_Ao_AACACGTGTGTGGCTC	18745	13914	Asexual	4103
AMRU_Ao_AACACGTTCCAGTAGT	15521	12160	Asexual	3442
AMRU_Ao_AACACGTTCGTCCGTT	7654	5612	Asexual	4599
AMRU_Ao_AACCATGAGTTTAGGA	4784	3612	Asexual	40
AMRU_Ao_AACCATGCACGAAACG	15939	12148	Asexual	3716
AMRU_Ao_AACCGCGAGATATACG	13106	10419	Asexual	3217
AMRU_Ao_AACCGCGCATGCTAGT	14048	4219	Asexual	7388
AMRU_Ao_AACGTTGAGTGTCTCA	30908	25977	Female	8806
AMRU_Ao_AACTCCCCACCGAAAG	8183	6569	Female	7651
AMRU_Ao_AACTCCCGTATAGGGC	13506	10067	Asexual	3113
AMRU_Ao_AACTCCCTCACATGCA	14222	9563	Asexual	5201
AMRU_Ao_AACTCTTCAACTGCTA	13622	9571	Asexual	5030
AMRU_Ao_AACTCTTTCACTATTC	19470	15279	Asexual	3409
AMRU_Ao_AACTGGTCAAGCTGAG	12072	9583	Asexual	2478
AMRU_Ao_AACTGGTGTGCGAAAC	14897	11797	Asexual	1387
AMRU_Ao_AACTGGTGTGTGACCC	8427	6834	Asexual	1185
AMRU_Ao_AACTGGTTCATGCTCC	11643	8988	Asexual	3023
AMRU_Ao_AACTGGTTCTGCGACG	4446	3244	Asexual	4122
AMRU_Ao_AACTGGTTCTGTCAAG	30272	25437	Female	8456
AMRU_Ao_AACTTTCAGGTGATTA	14073	10554	Asexual	4178
AMRU_Ao_AACTTTCCAATCTACG	19656	13977	Asexual	5005
AMRU_Ao_AACTTTCCATATGAGA	13740	10710	Asexual	3391
AMRU_Ao_AAGACCTAGGAGTACC	12163	9756	Asexual	2873
AMRU_Ao_AAGACCTCACTTAAGC	19363	16254	Female	8468
AMRU_Ao_AAGACCTCATCCCATC	18412	12715	Asexual	5286
AMRU_Ao_AAGACCTCATTCCTGC	27536	23251	Female	8851
AMRU_Ao_AAGACCTTCAGCGATT	30600	25407	Female	8097
AMRU_Ao_AAGCCGCAGCCGGTAA	9586	7275	Asexual	3073
AMRU_Ao_AAGCCGCTCAAGATCC	10278	8035	Asexual	2885
AMRU_Ao_AAGCCGCTCGCCAAAT	21287	15521	Asexual	5176
AMRU_Ao_AAGGAGCAGGTCGGAT	15882	12312	Asexual	3608
AMRU_Ao_AAGGAGCCAAGGTTTC	7725	6001	Asexual	3161
AMRU_Ao_AAGGAGCTCCCAAGAT	8170	6147	Asexual	4057
AMRU_Ao_AAGGCAGAGTGCCATT	15348	9801	Asexual	6039
AMRU_Ao_AAGGCAGGTCCGAACC	9589	7958	Female	8724
AMRU_Ao_AAGGCAGGTCCGAAGA	19911	15828	Asexual	2787
AMRU_Ao_AAGGTTCAGAAACCTA	10952	7434	Asexual	5909
AMRU_Ao_AAGGTTCAGCACACAG	16724	12810	Asexual	3786
AMRU_Ao_AAGGTTCGTCACACGC	11636	7857	Asexual	6995
AMRU_Ao_AAGGTTCTCAGTCAGT	17235	12061	Asexual	5060
AMRU_Ao_AAGGTTCTCCGAAGAG	14996	10758	Asexual	4417
AMRU_Ao_AAGGTTCTCGACCAGC	16030	11750	Asexual	3993
AMRU_Ao_AAGTCTGAGACTGGGT	9760	6656	Asexual	4838
AMRU_Ao_AAGTCTGGTCAATGTC	9446	7174	Asexual	3169
AMRU_Ao_AAGTCTGTCGCGTTTC	4921	3572	Asexual	4341
AMRU_Ao_AAGTCTGTCGTTGCCT	9039	6892	Asexual	2532
AMRU_Ao_AAGTCTGTCTACTCAT	24438	20414	Female	8502
AMRU_Ao_AATCCAGAGGGTTCCC	9264	7360	Female	7688
AMRU_Ao_AATCCAGAGTAGCCGA	17416	13373	Asexual	3574
AMRU_Ao_AATCCAGGTTACTGAC	14024	10308	Asexual	4800
AMRU_Ao_AATCCAGTCAACCAAC	12255	8587	Asexual	5034
AMRU_Ao_AATCCAGTCAATCACG	33026	27839	Female	8667
AMRU_Ao_AATCGGTGTACCCAAT	20806	15568	Asexual	3618
AMRU_Ao_ACACCAACAGCGAACA	9645	6462	Asexual	5039
AMRU_Ao_ACACCAATCACTTCAT	9197	6750	Asexual	6963
AMRU_Ao_ACACCAATCATATCGG	12777	9657	Asexual	4278
AMRU_Ao_ACACCGGAGTGTCCCG	15368	11449	Asexual	4006
AMRU_Ao_ACACCGGCACGAGGTA	17877	13424	Asexual	4224
AMRU_Ao_ACACCGGTCCGCAGTG	4226	3384	Asexual	46
AMRU_Ao_ACACTGACACCACGTG	14120	9284	Asexual	6268
AMRU_Ao_ACACTGAGTGGTACAG	16145	11149	Asexual	4820
AMRU_Ao_ACACTGATCCGAACGC	14987	10429	Asexual	4981
AMRU_Ao_ACACTGATCGCTAGCG	15836	11851	Asexual	4435
AMRU_Ao_ACACTGATCTGTGCAA	35411	29492	Female	8722
AMRU_Ao_ACAGCCGAGCCAGAAC	17613	13228	Asexual	4592
AMRU_Ao_ACAGCCGCAATGGATA	14364	10847	Asexual	6859
AMRU_Ao_ACAGCCGCACCAGGTC	13246	10500	Asexual	3317
AMRU_Ao_ACAGCCGGTTCAGTAC	3945	2951	NA	NA
AMRU_Ao_ACAGCTAAGCTGCCCA	4316	3291	Asexual	368
AMRU_Ao_ACAGCTACACCACGTG	9247	7077	Asexual	1499
AMRU_Ao_ACATACGCACGCTTTC	8266	5391	Asexual	5136
AMRU_Ao_ACATACGTCATCGGAT	9749	7823	Asexual	2437
AMRU_Ao_ACATCAGAGAGTCTGG	36221	30438	Female	8749
AMRU_Ao_ACATCAGGTCGACTAT	28743	24610	Female	8811
AMRU_Ao_ACATCAGTCCATGAAC	14707	10732	Asexual	4215
AMRU_Ao_ACATCAGTCTACTTAC	9838	7390	Asexual	4431
AMRU_Ao_ACATGGTAGTACATGA	4973	3823	Asexual	313
AMRU_Ao_ACATGGTCAACACGCC	8687	5167	Asexual	7012
AMRU_Ao_ACATGGTGTAGCGCAA	22463	18516	Female	8301
AMRU_Ao_ACATGGTTCCAATGGT	8314	6168	Asexual	27
AMRU_Ao_ACCAGTACAGCTGTTA	35926	27026	Asexual	4501
AMRU_Ao_ACCAGTATCACATACG	10230	7933	Asexual	1360
AMRU_Ao_ACCCACTCACCGATAT	32720	26840	Female	8106
AMRU_Ao_ACCCACTTCAAACCAC	32919	27876	Female	8783
AMRU_Ao_ACCCACTTCAACACGT	12671	10102	Asexual	2741
AMRU_Ao_ACCCACTTCTTAACCT	30592	25426	Female	8753
AMRU_Ao_ACCGTAAAGGCTCTTA	34953	29342	Female	8664
AMRU_Ao_ACCGTAACAGTGGAGT	4042	3121	Asexual	3485
AMRU_Ao_ACCGTAAGTGTATGGG	9679	6873	Asexual	4931
AMRU_Ao_ACCTTTAAGGACAGCT	13787	10589	Asexual	4373
AMRU_Ao_ACCTTTAGTCTTCAAG	7402	5534	Asexual	223
AMRU_Ao_ACCTTTATCCACGTTC	34897	29753	Female	8852
AMRU_Ao_ACGAGCCAGATGTCGG	6681	4938	Asexual	3670
AMRU_Ao_ACGAGCCTCGCAAACT	8408	6745	Female	8979
AMRU_Ao_ACGAGGAAGTAAGTAC	20205	16329	Asexual	1697
AMRU_Ao_ACGAGGACAAACTGCT	10730	7398	Asexual	5437
AMRU_Ao_ACGAGGAGTGTGAATA	30638	26170	Female	8568
AMRU_Ao_ACGATACAGCCGATTT	17501	12579	Asexual	4731
AMRU_Ao_ACGATACCACAGCCCA	12271	9571	Asexual	2676
AMRU_Ao_ACGATACCACGGTGTC	15669	9928	Asexual	5500
AMRU_Ao_ACGATACGTAGGGTAC	19505	13831	Asexual	4855
AMRU_Ao_ACGATACGTTACGCGC	19100	14981	Asexual	2439
AMRU_Ao_ACGATGTGTGTTTGGT	5025	3644	Asexual	4645
AMRU_Ao_ACGCAGCCAAGGCTCC	11264	8233	Asexual	176
AMRU_Ao_ACGCAGCCACGGACAA	11158	8212	Asexual	3872
AMRU_Ao_ACGCCAGCAGTTAACC	7653	6039	Asexual	815
AMRU_Ao_ACGCCAGGTTCGTGAT	6860	4948	Asexual	2793
AMRU_Ao_ACGCCAGTCAACCATG	11299	8527	Asexual	1227
AMRU_Ao_ACGCCGAAGAAACCGC	6158	4543	Asexual	5109
AMRU_Ao_ACGCCGAAGTGGGATC	7080	5443	Asexual	3367
AMRU_Ao_ACGCCGATCATGCATG	40063	34243	Female	8780
AMRU_Ao_ACGGAGAAGCAGACTG	28393	23852	Female	8770
AMRU_Ao_ACGGAGAGTCTCATCC	4049	2838	Asexual	2257
AMRU_Ao_ACGGAGAGTGGTCCGT	3732	2814	Asexual	464
AMRU_Ao_ACGGAGAGTTCGAATC	14101	11130	Asexual	4092
AMRU_Ao_ACGGAGATCAGTTCGA	8885	6593	Asexual	4488
AMRU_Ao_ACGGAGATCCGCAAGC	11828	9236	Asexual	3828
AMRU_Ao_ACGGAGATCTCTGCTG	14599	11020	Asexual	4142
AMRU_Ao_ACGGCCAAGATCCCAT	12368	9213	Asexual	4299
AMRU_Ao_ACGGCCACAAAGGCGT	30019	25120	Female	8704
AMRU_Ao_ACGGCCACATCCGTGG	15612	10258	Asexual	5630
AMRU_Ao_ACGGCCACATGGTAGG	19160	12002	Asexual	6340
AMRU_Ao_ACGGCCAGTGAGCGAT	3120	2584	Asexual	3305
AMRU_Ao_ACGGCCATCGGCGGTT	12816	8245	Asexual	5401
AMRU_Ao_ACGGGCTAGACTAGAT	6380	4982	Asexual	4162
AMRU_Ao_ACGGGCTAGCTAACAA	7178	4826	Asexual	5216
AMRU_Ao_ACGGGCTAGTCTTGCA	15918	11063	Asexual	4957
AMRU_Ao_ACGGGCTCACCGATAT	18951	15292	Asexual	1853
AMRU_Ao_ACGGGCTGTATTCGTG	11789	9199	Asexual	3435
AMRU_Ao_ACGGGCTTCATGTGGT	13543	10494	Asexual	3772
AMRU_Ao_ACGGGTCAGGTGATAT	13119	8080	Asexual	5353
AMRU_Ao_ACGGGTCCACGTAAGG	12878	10048	Asexual	3030
AMRU_Ao_ACGGGTCTCGGAATCT	12521	8896	Asexual	4796
AMRU_Ao_ACGTCAAAGACTTTCG	15561	11477	Asexual	4576
AMRU_Ao_ACGTCAAAGCACCGTC	29018	24006	Female	8343
AMRU_Ao_ACGTCAAAGCTGCCCA	10221	7530	Asexual	4198
AMRU_Ao_ACGTCAACATGTTCCC	10792	8279	Asexual	1563
AMRU_Ao_ACTATCTGTGCACTTA	23879	17258	Asexual	4732
AMRU_Ao_ACTATCTTCCGTAGTA	12073	9781	Asexual	2268
AMRU_Ao_ACTGAACCAATAGAGT	17985	13950	Asexual	2017
AMRU_Ao_ACTGAACGTACTCAAC	14295	10974	Asexual	3690
AMRU_Ao_ACTGAGTAGAGCAATT	17009	13726	Female	7696
AMRU_Ao_ACTGAGTAGATATACG	14655	11450	Asexual	3556
AMRU_Ao_ACTGAGTAGCAAATCA	15052	11332	Asexual	4320
AMRU_Ao_ACTGAGTCAAAGGCGT	12381	7435	Asexual	6009
AMRU_Ao_ACTGCTCAGACGACGT	16994	13561	Asexual	2336
AMRU_Ao_ACTGCTCCAGGATCGA	11381	9024	Asexual	3548
AMRU_Ao_ACTGCTCCAGTCTTCC	5332	4103	Asexual	392
AMRU_Ao_ACTGTCCAGCTGGAAC	4811	3614	Asexual	1450
AMRU_Ao_ACTGTCCCACGTGAGA	11537	9560	Female	8201
AMRU_Ao_ACTGTCCCATTCGACA	5099	3885	Asexual	4294
AMRU_Ao_ACTGTCCTCCTACAGA	33233	27645	Female	8836
AMRU_Ao_ACTGTCCTCCTGCTTG	10919	7157	Asexual	5901
AMRU_Ao_ACTGTCCTCGCCAAAT	9164	6909	Asexual	3511
AMRU_Ao_ACTTACTAGAAGAAGC	29843	25254	Female	8355
AMRU_Ao_ACTTACTCAGATCCAT	12401	9519	Asexual	1813
AMRU_Ao_ACTTACTCATGAACCT	9216	6349	Asexual	6193
AMRU_Ao_ACTTACTGTCCCTTGT	12518	9569	Asexual	52
AMRU_Ao_ACTTGTTAGTTTGCGT	10708	8433	Asexual	3072
AMRU_Ao_ACTTGTTGTGCAGTAG	8740	6747	Female	7783
AMRU_Ao_ACTTGTTTCACCATAG	11805	9396	Asexual	2468
AMRU_Ao_ACTTGTTTCCTAGAAC	11189	8434	Asexual	2954
AMRU_Ao_ACTTTCAAGAAGGGTA	4195	3145	Asexual	5106
AMRU_Ao_ACTTTCAAGCGCTCCA	6030	4396	Asexual	4344
AMRU_Ao_ACTTTCACATTACGAC	13454	9959	Asexual	3516
AMRU_Ao_ACTTTCAGTAAATGAC	29890	24971	Female	8656
AMRU_Ao_ACTTTCAGTACATGTC	14241	11555	Asexual	2878
AMRU_Ao_AGAATAGAGGCCCTTG	9081	7309	Asexual	1716
AMRU_Ao_AGAATAGAGGGATGGG	15169	10782	Asexual	4797
AMRU_Ao_AGAATAGAGGGCATGT	5066	3821	Asexual	1014
AMRU_Ao_AGACGTTGTCACACGC	8945	6372	Asexual	7256
AMRU_Ao_AGACGTTTCGGTGTCG	12596	7978	Asexual	5565
AMRU_Ao_AGAGCGAAGAGAACAG	10811	8423	Asexual	1272
AMRU_Ao_AGAGCGAAGCGTGTCC	16566	7151	NA	NA
AMRU_Ao_AGAGCGACATGCTAGT	15564	11414	Asexual	4525
AMRU_Ao_AGAGCGAGTTCCACGG	18764	12410	Asexual	5190
AMRU_Ao_AGAGCGATCGCCTGTT	8370	6729	Asexual	2008
AMRU_Ao_AGAGCTTAGTGAAGAG	11833	7591	Asexual	6507
AMRU_Ao_AGAGCTTCACCATGTA	16215	13154	Female	7951
AMRU_Ao_AGAGCTTCATCTCCCA	10644	8155	Asexual	2671
AMRU_Ao_AGAGCTTTCATCGCTC	17722	13267	Asexual	3995
AMRU_Ao_AGAGTGGCAAGCGTAG	11109	7951	Asexual	4579
AMRU_Ao_AGAGTGGCACAGGTTT	20049	13815	Asexual	5225
AMRU_Ao_AGAGTGGCAGCCTGTG	16425	11425	Asexual	4891
AMRU_Ao_AGAGTGGGTATAGGTA	17136	12447	Asexual	4348
AMRU_Ao_AGAGTGGGTCCAGTGC	5609	3929	Asexual	7574
AMRU_Ao_AGAGTGGTCACAAACC	10467	7974	Asexual	3843
AMRU_Ao_AGAGTGGTCACTTACT	9799	6536	Asexual	5633
AMRU_Ao_AGAGTGGTCGTACCGG	18178	11744	Asexual	6172
AMRU_Ao_AGATCTGAGACTGGGT	19706	16395	Female	8973
AMRU_Ao_AGATCTGAGCTAACTC	16649	12293	Asexual	4476
AMRU_Ao_AGATCTGCATTAACCG	7943	5325	Asexual	5372
AMRU_Ao_AGATCTGGTCGCGAAA	7833	5952	Asexual	48
AMRU_Ao_AGATTGCCAATGGACG	8956	6784	Male	9133
AMRU_Ao_AGATTGCGTTTGCATG	40973	33833	Female	8053
AMRU_Ao_AGATTGCTCACCCGAG	14183	11160	Female	7934
AMRU_Ao_AGATTGCTCACGGTTA	23936	20108	Female	8732
AMRU_Ao_AGCAGCCGTCAGAAGC	19911	16327	Female	8114
AMRU_Ao_AGCAGCCGTGCAGGTA	17576	12342	Asexual	5336
AMRU_Ao_AGCATACAGAATAGGG	16752	12430	Asexual	4669
AMRU_Ao_AGCATACAGAGAGCTC	15300	11797	Asexual	1805
AMRU_Ao_AGCATACCATACGCCG	21900	16114	Asexual	4166
AMRU_Ao_AGCATACGTCGCGTGT	8371	6557	Asexual	1557
AMRU_Ao_AGCATACGTGCAACGA	12740	10293	Female	7679
AMRU_Ao_AGCATACTCTCCGGTT	15462	12228	Asexual	2135
AMRU_Ao_AGCCTAAAGCGTTGCC	12118	9370	Asexual	3344
AMRU_Ao_AGCCTAACACGCGAAA	13170	10152	Asexual	3062
AMRU_Ao_AGCCTAATCTTGACGA	4555	3520	Asexual	29
AMRU_Ao_AGCGGTCAGTTCGATC	17654	12936	Asexual	4908
AMRU_Ao_AGCGGTCCACACATGT	14594	9734	Asexual	5941
AMRU_Ao_AGCGGTCTCTGCGTAA	18977	15901	Female	8364
AMRU_Ao_AGCGTATAGTGTTTGC	10764	6536	Asexual	6255
AMRU_Ao_AGCGTATGTACTTGAC	20177	15062	Asexual	4231
AMRU_Ao_AGCGTATTCAGATAAG	13863	10148	Asexual	4363
AMRU_Ao_AGCGTCGAGGGATCTG	7583	5685	Asexual	3758
AMRU_Ao_AGCGTCGTCGTCACGG	7001	4288	Asexual	6271
AMRU_Ao_AGCGTCGTCGTTTGCC	7520	5579	Asexual	4358
AMRU_Ao_AGCTCCTAGATGCGAC	12182	8836	Asexual	4682
AMRU_Ao_AGCTCCTAGGGTCGAT	14895	10412	Asexual	4816
AMRU_Ao_AGCTCCTCAATGAAAC	21540	15207	Asexual	4831
AMRU_Ao_AGCTCCTGTCTGGAGA	13957	8869	Asexual	5945
AMRU_Ao_AGCTCCTGTTCCCTTG	4459	3309	Female	7718
AMRU_Ao_AGCTCCTTCCAGAGGA	7380	4526	Asexual	5663
AMRU_Ao_AGCTCCTTCGCCTGAG	9578	6691	Asexual	4673
AMRU_Ao_AGCTCCTTCTTGCATT	10833	8416	Asexual	4069
AMRU_Ao_AGCTCTCCAGATCTGT	11523	7401	Asexual	5579
AMRU_Ao_AGCTCTCGTTACGCGC	18706	14286	Asexual	4028
AMRU_Ao_AGCTTGACAACACCCG	15993	12314	Asexual	3570
AMRU_Ao_AGCTTGATCGAATGGG	7535	5090	Asexual	6498
AMRU_Ao_AGGCCACAGCCCAACC	3368	2602	Asexual	4079
AMRU_Ao_AGGCCACAGCTGCAAG	12701	9858	Asexual	2462
AMRU_Ao_AGGCCACCACCCATTC	13500	10647	Asexual	3629
AMRU_Ao_AGGCCGTAGCTCTCGG	7355	4715	Asexual	5865
AMRU_Ao_AGGGAGTAGCTCCTCT	20302	13268	Asexual	5677
AMRU_Ao_AGGGAGTCATAAAGGT	9495	7517	Asexual	2073
AMRU_Ao_AGGGAGTGTTTAAGCC	26182	21834	Female	8847
AMRU_Ao_AGGGAGTTCTTACCTA	11533	8797	Asexual	3838
AMRU_Ao_AGGGATGAGAGGTTGC	13055	9733	Asexual	1698
AMRU_Ao_AGGGATGCAATCGGTT	11794	9381	Asexual	2447
AMRU_Ao_AGGGATGCAGCGTCCA	14032	11058	Asexual	2435
AMRU_Ao_AGGGATGCATCGATTG	15774	11921	Asexual	4407
AMRU_Ao_AGGGATGTCTCTGAGA	13409	10839	Female	7625
AMRU_Ao_AGGGTGACACATTTCT	13657	10038	Asexual	4598
AMRU_Ao_AGGGTGAGTTAGGGTG	9944	7743	Female	7969
AMRU_Ao_AGGTCATAGATGAGAG	18869	11936	Asexual	6456
AMRU_Ao_AGGTCATGTAAGAGAG	28298	23829	Female	8933
AMRU_Ao_AGGTCCGCAATCTACG	18483	12310	Asexual	5706
AMRU_Ao_AGGTCCGCATGGGAAC	17502	11066	Asexual	6357
AMRU_Ao_AGGTCCGGTTTGTGTG	23981	20132	Female	8930
AMRU_Ao_AGTAGTCCAGGCAGTA	15914	13271	Female	8625
AMRU_Ao_AGTAGTCCAGTATAAG	22549	18409	Female	7936
AMRU_Ao_AGTAGTCGTGTATGGG	12706	8861	Asexual	4631
AMRU_Ao_AGTAGTCTCACAGGCC	18903	13367	Asexual	4748
AMRU_Ao_AGTCTTTAGAGTAAGG	4021	3069	Asexual	1976
AMRU_Ao_AGTCTTTTCATTTGGG	8179	5703	Asexual	6706
AMRU_Ao_AGTCTTTTCTATCCTA	11456	8725	Asexual	3044
AMRU_Ao_AGTGAGGAGAAACCTA	12621	8324	Asexual	5760
AMRU_Ao_AGTGAGGTCAGCTCGG	10598	8384	Asexual	2572
AMRU_Ao_AGTGAGGTCATGTAGC	16089	13102	Female	8240
AMRU_Ao_AGTGGGAAGCTAAGAT	10472	8076	Asexual	2901
AMRU_Ao_AGTGGGACAGTCAGCC	10458	8028	Asexual	3056
AMRU_Ao_AGTGGGAGTGCACCAC	10291	8079	Asexual	1108
AMRU_Ao_AGTGGGATCATTGCCC	32124	26897	Female	8755
AMRU_Ao_AGTGTCAAGGTCATCT	4244	3068	Asexual	4856
AMRU_Ao_AGTGTCAGTACTTAGC	11907	8860	Asexual	4586
AMRU_Ao_AGTGTCATCCTTGGTC	6026	4779	Female	7605
AMRU_Ao_AGTTGGTAGAATTCCC	15056	11955	Asexual	3819
AMRU_Ao_AGTTGGTAGATCCCAT	13625	10393	Asexual	3944
AMRU_Ao_AGTTGGTCAGAGTGTG	11525	8942	Asexual	2779
AMRU_Ao_AGTTGGTCAGTTCATG	17064	13482	Asexual	2109
AMRU_Ao_AGTTGGTGTCCAGTGC	11794	8947	Asexual	3521
AMRU_Ao_ATAACGCCAGGACCCT	18438	14975	Asexual	3439
AMRU_Ao_ATAACGCCAGTATCTG	3553	2187	Asexual	6991
AMRU_Ao_ATAACGCGTTATGCGT	30490	25783	Female	8647
AMRU_Ao_ATAACGCTCAGCTGGC	12229	9526	Asexual	2208
AMRU_Ao_ATAACGCTCCGCGCAA	8781	6813	Asexual	1337
AMRU_Ao_ATAACGCTCTGTCTAT	7376	4482	Asexual	6471
AMRU_Ao_ATAAGAGAGATGCCTT	8535	7041	Female	8251
AMRU_Ao_ATAAGAGGTAGATTAG	4048	3183	Asexual	3486
AMRU_Ao_ATAAGAGTCAATCACG	14908	10992	Asexual	4145
AMRU_Ao_ATAGACCCATGGAATA	6175	4808	Asexual	2059
AMRU_Ao_ATAGACCGTGCAACTT	9838	7802	Asexual	1346
AMRU_Ao_ATAGACCGTTAAGAAC	10758	8665	Asexual	1156
AMRU_Ao_ATCACGAAGATAGGAG	4450	3362	Asexual	4055
AMRU_Ao_ATCACGATCTACTTAC	16619	12674	Asexual	3285
AMRU_Ao_ATCATCTAGAGCTATA	4253	3224	Asexual	693
AMRU_Ao_ATCATCTCACATTTCT	7193	4984	Asexual	6620
AMRU_Ao_ATCATCTCAGGGATTG	12531	7942	Asexual	5837
AMRU_Ao_ATCATCTTCGTCACGG	8851	7212	Asexual	2112
AMRU_Ao_ATCATGGCAATGGAGC	22821	18927	Female	8398
AMRU_Ao_ATCATGGGTGACGGTA	15761	11483	Asexual	4247
AMRU_Ao_ATCATGGGTGCATCTA	38835	31835	Female	8074
AMRU_Ao_ATCCACCAGTCTCCTC	25900	21550	Female	8337
AMRU_Ao_ATCCACCTCGGCTACG	15040	11117	Asexual	4739
AMRU_Ao_ATCCACCTCTTAGCCC	12762	9975	Asexual	4040
AMRU_Ao_ATCCGAAAGCACACAG	10284	7598	Asexual	4448
AMRU_Ao_ATCCGAACACTGAAGG	21850	18088	Female	8426
AMRU_Ao_ATCCGAACATGCCTTC	19095	12499	Asexual	5583
AMRU_Ao_ATCCGAATCCCAACGG	8821	6616	Female	7831
AMRU_Ao_ATCCGAATCCTCCTAG	10388	7435	Asexual	4753
AMRU_Ao_ATCCGAATCTACCAGA	28396	23844	Female	8833
AMRU_Ao_ATCCGAATCTGTCCGT	14366	8769	Asexual	6207
AMRU_Ao_ATCGAGTAGCTAGCCC	14140	10886	Asexual	3822
AMRU_Ao_ATCGAGTCATCTGGTA	8028	3813	Asexual	7158
AMRU_Ao_ATCGAGTGTGAAATCA	13561	8587	Asexual	5785
AMRU_Ao_ATCGAGTGTTTGTGTG	31794	26893	Female	8218
AMRU_Ao_ATCGAGTTCAACACCA	24379	20498	Female	8454
AMRU_Ao_ATCTACTAGGCCGAAT	9060	7134	Asexual	1468
AMRU_Ao_ATCTACTCAATCCGAT	31424	26510	Female	8734
AMRU_Ao_ATCTACTCAGGTGGAT	35001	29363	Female	8496
AMRU_Ao_ATCTACTGTAAACACA	4216	3330	Asexual	1165
AMRU_Ao_ATCTACTGTACCGGCT	13824	10947	Asexual	3990
AMRU_Ao_ATCTACTGTCTAGCCG	7145	5910	Asexual	2311
AMRU_Ao_ATCTACTTCGCATGGC	8100	6411	Asexual	1473
AMRU_Ao_ATCTGCCAGACCGGAT	8290	6398	Asexual	6829
AMRU_Ao_ATCTGCCAGCGAGAAA	17207	12032	Asexual	5141
AMRU_Ao_ATCTGCCGTGATGTCT	5000	3683	Asexual	612
AMRU_Ao_ATGAGGGAGGATGGAA	13093	10911	Female	8876
AMRU_Ao_ATGAGGGCATATGGTC	8112	6422	Asexual	1069
AMRU_Ao_ATGAGGGGTGAGGGAG	16402	11337	Asexual	5102
AMRU_Ao_ATGAGGGGTGTGGTTT	15794	11307	Asexual	4762
AMRU_Ao_ATGAGGGTCCAGAGGA	27022	22354	Female	8298
AMRU_Ao_ATGCGATAGTACGCGA	15876	11979	Asexual	3672
AMRU_Ao_ATGCGATGTAGCAAAT	16134	12167	Asexual	3536
AMRU_Ao_ATGGGAGAGCACCGTC	17227	11854	Asexual	5007
AMRU_Ao_ATGGGAGCACGCTTTC	21809	16690	Asexual	3877
AMRU_Ao_ATGGGAGCATACAGCT	20291	14779	Asexual	4563
AMRU_Ao_ATGGGAGTCCACGCAG	15946	11980	Asexual	3945
AMRU_Ao_ATGTGTGAGGGCTCTC	12827	9791	Asexual	2950
AMRU_Ao_ATGTGTGCAAGAAAGG	11852	7735	Asexual	5423
AMRU_Ao_ATGTGTGCACCAGCAC	12560	8322	Asexual	5714
AMRU_Ao_ATTATCCAGGATGTAT	12824	9999	Asexual	2149
AMRU_Ao_ATTATCCAGTGCCAGA	30556	24995	Female	8208
AMRU_Ao_ATTATCCCATCACAAC	14739	11018	Asexual	4258
AMRU_Ao_ATTATCCTCACGCGGT	5614	4027	Asexual	4559
AMRU_Ao_ATTCTACCAACGATGG	14782	9546	Asexual	5792
AMRU_Ao_ATTCTACCATGTTCCC	14447	10895	Asexual	3769
AMRU_Ao_ATTCTACGTTCCACAA	25388	21061	Female	8740
AMRU_Ao_ATTCTACTCGTTGCCT	11248	8508	Asexual	3968
AMRU_Ao_ATTGGACAGACACTAA	11363	8618	Asexual	3382
AMRU_Ao_ATTGGACAGGAATTAC	5106	4152	Asexual	1587
AMRU_Ao_ATTGGACGTCCTCTTG	20539	15004	Asexual	4777
AMRU_Ao_ATTGGACTCTGCTGCT	19040	14513	Asexual	2933
AMRU_Ao_ATTGGACTCTTCGAGA	11373	6839	Asexual	6016
AMRU_Ao_ATTGGACTCTTGTTTG	15930	11576	Asexual	3795
AMRU_Ao_ATTGGTGCACGGATAG	10924	8109	Asexual	6665
AMRU_Ao_ATTGGTGCAGACAAGC	17005	12600	Asexual	4927
AMRU_Ao_ATTGGTGGTCTAAACC	16810	13122	Asexual	2543
AMRU_Ao_ATTGGTGGTTTAGCTG	18504	13926	Asexual	3784
AMRU_Ao_ATTTCTGCACTACAGT	11030	8308	Asexual	3526
AMRU_Ao_ATTTCTGCAGGTCTCG	8603	6653	Asexual	6939
AMRU_Ao_ATTTCTGGTCAGGACA	10989	8705	Asexual	1755
AMRU_Ao_ATTTCTGGTCCGTGAC	9817	7818	Asexual	1198
AMRU_Ao_ATTTCTGGTCTCAACA	8800	6820	Female	7609
AMRU_Ao_ATTTCTGTCCCAGGTG	15366	11572	Asexual	4221
AMRU_Ao_ATTTCTGTCTACCTGC	8317	6588	Asexual	2738
AMRU_Ao_CAACCAAAGAAACGAG	5460	3867	Asexual	4106
AMRU_Ao_CAACCAAGTAGCTTGT	14534	9894	Asexual	6520
AMRU_Ao_CAACCAAGTCGGCTCA	5055	3944	Asexual	98
AMRU_Ao_CAACCAAGTCTAGTGT	9519	7380	Asexual	4118
AMRU_Ao_CAACCAATCAGTGCAT	12167	7852	Asexual	5965
AMRU_Ao_CAACCTCCACCGAAAG	8883	7039	Asexual	2917
AMRU_Ao_CAACCTCGTATCACCA	21255	14896	Asexual	4973
AMRU_Ao_CAACCTCGTTAGAACA	10150	7634	Asexual	2166
AMRU_Ao_CAACTAGAGCGATAGC	15113	12211	Asexual	2727
AMRU_Ao_CAAGAAACACTAGTAC	32701	27286	Female	8371
AMRU_Ao_CAAGAAAGTTGAGGTG	13377	9028	Asexual	5729
AMRU_Ao_CAAGATCAGTGAACGC	11513	9034	Asexual	2428
AMRU_Ao_CAAGATCCACATGTGT	17848	12073	Asexual	5242
AMRU_Ao_CAAGATCGTACCGGCT	9945	7810	Asexual	3778
AMRU_Ao_CAAGATCGTCATATCG	13689	9268	Asexual	5341
AMRU_Ao_CAAGATCGTCCCGACA	15513	11698	Asexual	4250
AMRU_Ao_CAAGATCTCTATGTGG	14338	10250	Asexual	6745
AMRU_Ao_CAAGGCCAGACGCTTT	25866	21241	Female	8217
AMRU_Ao_CAAGGCCTCAGGTAAA	14791	11429	Asexual	3644
AMRU_Ao_CAAGGCCTCCGTCAAA	18328	11985	Asexual	5619
AMRU_Ao_CAAGTTGAGGCATGTG	9841	7274	Asexual	7165
AMRU_Ao_CAAGTTGTCCTTGGTC	10259	7361	Asexual	4159
AMRU_Ao_CACAAACAGAATGTGT	12821	10156	Asexual	3002
AMRU_Ao_CACAAACCATGATCCA	11153	8276	Asexual	4174
AMRU_Ao_CACAAACGTTCGCGAC	12326	9883	Asexual	2890
AMRU_Ao_CACAAACTCGCTTGTC	35489	29502	Female	8207
AMRU_Ao_CACAAACTCTTCTGGC	11063	8603	Asexual	1835
AMRU_Ao_CACACAAAGAGTCGGT	17306	13412	Asexual	3063
AMRU_Ao_CACACAAAGTCCGGTC	11056	6481	Asexual	5934
AMRU_Ao_CACACAAAGTGGACGT	4716	3810	Asexual	1984
AMRU_Ao_CACACAACATTGGGCC	21065	16520	Asexual	2029
AMRU_Ao_CACACTCCAGCCTGTG	18527	13833	Asexual	4438
AMRU_Ao_CACAGGCAGGCGACAT	15638	9445	Asexual	6169
AMRU_Ao_CACAGGCGTCTGGAGA	16118	10480	Asexual	5465
AMRU_Ao_CACATAGGTACTCGCG	13953	8266	Asexual	6457
AMRU_Ao_CACATAGTCCAAACTG	6493	4833	Asexual	30
AMRU_Ao_CACATTTGTTAGTGGG	15472	11033	Asexual	4725
AMRU_Ao_CACATTTTCAATCACG	11119	8310	Asexual	2331
AMRU_Ao_CACCACTCATCACGAT	3576	2735	Asexual	1271
AMRU_Ao_CACCACTGTAGCCTCG	9142	6770	Asexual	3351
AMRU_Ao_CACCACTTCCTGTAGA	14525	11168	Asexual	3730
AMRU_Ao_CACCAGGAGTGGGCTA	16135	12469	Asexual	2021
AMRU_Ao_CACCAGGGTGAAAGAG	12332	9556	Asexual	3606
AMRU_Ao_CACCTTGAGCTAACAA	16314	11505	Asexual	4681
AMRU_Ao_CACCTTGTCGTATCAG	9504	6831	Asexual	4529
AMRU_Ao_CACCTTGTCTTGGGTA	13066	10116	Asexual	2002
AMRU_Ao_CACTCCAAGCTTCGCG	10670	8258	Asexual	4227
AMRU_Ao_CACTCCATCAAACCGT	9366	7172	Asexual	1432
AMRU_Ao_CAGAATCAGCGATTCT	12547	9618	Asexual	2896
AMRU_Ao_CAGAATCAGGACACCA	35890	29196	Female	7926
AMRU_Ao_CAGAATCAGGCTCTTA	17774	13652	Asexual	2836
AMRU_Ao_CAGAATCTCGATCCCT	4226	3034	Asexual	2153
AMRU_Ao_CAGAGAGCAGACGCCT	14787	11631	Asexual	3862
AMRU_Ao_CAGAGAGCATCACGAT	9592	7547	Asexual	1822
AMRU_Ao_CAGAGAGCATGAGCGA	27499	23041	Female	8950
AMRU_Ao_CAGAGAGTCCACTCCA	4809	3608	Asexual	32
AMRU_Ao_CAGAGAGTCCCAACGG	14285	11246	Asexual	1504
AMRU_Ao_CAGATCAAGCTAAGAT	9101	6906	Asexual	2013
AMRU_Ao_CAGATCAAGGCTCATT	27006	22943	Female	8827
AMRU_Ao_CAGATCAGTACACCGC	9162	7489	Female	7856
AMRU_Ao_CAGATCAGTTCAGGCC	6431	5324	Female	9063
AMRU_Ao_CAGATCATCCCACTTG	11846	9245	Asexual	3203
AMRU_Ao_CAGATCATCCTATGTT	9668	6763	Asexual	4517
AMRU_Ao_CAGCAGCAGATCGATA	9279	7499	Asexual	2561
AMRU_Ao_CAGCAGCGTATAGGTA	18289	15243	Female	8346
AMRU_Ao_CAGCAGCGTGTGACCC	15666	10688	Asexual	5134
AMRU_Ao_CAGCATAAGTCAATAG	16744	13233	Asexual	3157
AMRU_Ao_CAGCATAAGTGCTGCC	13790	10768	Asexual	2324
AMRU_Ao_CAGCCGAAGCGTGAGT	14102	10680	Asexual	3992
AMRU_Ao_CAGCCGACAAAGGAAG	6061	4547	Asexual	736
AMRU_Ao_CAGCCGAGTCCTGCTT	40039	34002	Female	8744
AMRU_Ao_CAGCGACCACCGATAT	39920	34216	Female	8900
AMRU_Ao_CAGCGACCAGGTCTCG	5753	4166	Asexual	6699
AMRU_Ao_CAGCGACGTAGGCATG	9945	6949	Asexual	4636
AMRU_Ao_CAGCGACTCACCCGAG	17028	12181	Asexual	5008
AMRU_Ao_CAGCGACTCCATGCTC	14345	11289	Asexual	2600
AMRU_Ao_CAGCGACTCGACGGAA	4075	3048	Asexual	178
AMRU_Ao_CAGCTAAAGACCGGAT	4091	3238	Asexual	1990
AMRU_Ao_CAGCTAAAGTGTGAAT	12998	9790	Asexual	4394
AMRU_Ao_CAGCTAACAAACCCAT	16471	13128	Asexual	2111
AMRU_Ao_CAGCTAAGTAAGGGCT	7891	6255	Asexual	2743
AMRU_Ao_CAGCTAAGTACCTACA	16084	11920	Asexual	4595
AMRU_Ao_CAGCTAATCTTCATGT	13424	10748	Asexual	3094
AMRU_Ao_CAGCTGGAGGAGCGAG	33191	27792	Female	8775
AMRU_Ao_CAGCTGGAGTGTACCT	16398	11959	Asexual	4633
AMRU_Ao_CAGCTGGCATCTATGG	15229	9338	Asexual	5519
AMRU_Ao_CAGCTGGTCAACGCTA	11371	8908	Asexual	3038
AMRU_Ao_CAGGTGCAGATCGGGT	16724	13116	Asexual	3724
AMRU_Ao_CAGGTGCCAATAGCAA	5366	4003	Asexual	4075
AMRU_Ao_CAGGTGCCACGAGGTA	30436	25671	Female	8694
AMRU_Ao_CAGGTGCCATGACGGA	14631	11549	Asexual	2306
AMRU_Ao_CAGGTGCGTACACCGC	13220	9294	Asexual	4751
AMRU_Ao_CAGGTGCGTTCAACCA	17940	13759	Asexual	3294
AMRU_Ao_CAGGTGCGTTGCGCAC	22408	18100	Female	8070
AMRU_Ao_CAGTAACCACTATCTT	7844	6053	Asexual	4301
AMRU_Ao_CAGTAACTCAGGCAAG	13125	10306	Asexual	3352
AMRU_Ao_CAGTCCTAGTGTCCCG	37994	31706	Female	8488
AMRU_Ao_CAGTCCTCAATCGGTT	4720	3730	Asexual	3781
AMRU_Ao_CAGTCCTGTCTGCCAG	13456	8460	Asexual	6306
AMRU_Ao_CAGTCCTTCGCCAAAT	20433	13850	Asexual	5379
AMRU_Ao_CAGTCCTTCGGCGCTA	13346	10136	Asexual	3566
AMRU_Ao_CATATGGAGTGAAGAG	8569	6437	Asexual	3924
AMRU_Ao_CATATGGCAAACAACA	8131	6015	Asexual	4017
AMRU_Ao_CATATTCAGAAGCCCA	14046	10645	Female	7853
AMRU_Ao_CATATTCAGCGGCTTC	27528	23035	Female	8905
AMRU_Ao_CATATTCAGGCTCAGA	33412	27878	Female	8333
AMRU_Ao_CATATTCCAAACCCAT	8424	6720	Asexual	2970
AMRU_Ao_CATATTCCATCCCATC	13960	10813	Asexual	4061
AMRU_Ao_CATATTCGTAACGTTC	18196	14650	Female	8154
AMRU_Ao_CATATTCGTATCTGCA	14419	11421	Asexual	2379
AMRU_Ao_CATATTCTCAGTACGT	14264	11173	Asexual	3412
AMRU_Ao_CATCAAGAGAAGATTC	31635	26551	Female	8147
AMRU_Ao_CATCAAGAGAATGTGT	33441	28530	Female	8896
AMRU_Ao_CATCAAGAGCACAGGT	8946	7370	Female	7966
AMRU_Ao_CATCAAGCAATGGTCT	17296	12348	Asexual	4496
AMRU_Ao_CATCAAGGTCACACGC	6380	4844	Asexual	3563
AMRU_Ao_CATCAAGGTGTAAGTA	4084	3278	NA	NA
AMRU_Ao_CATCAGAAGCTAGGCA	5565	4380	Asexual	3010
AMRU_Ao_CATCAGACAGCATGAG	31638	25049	Female	7849
AMRU_Ao_CATCAGATCCAGAGGA	14611	11145	Asexual	3653
AMRU_Ao_CATCCACAGATCCCGC	8683	6646	Asexual	2724
AMRU_Ao_CATCCACCACAACGCC	9166	6807	Asexual	3942
AMRU_Ao_CATCGAACAGGACCCT	15303	10307	Asexual	6083
AMRU_Ao_CATCGAACAGGTCCAC	11736	8922	Asexual	3711
AMRU_Ao_CATCGAAGTCCGACGT	12555	9383	Asexual	4372
AMRU_Ao_CATCGAAGTGCGCTTG	12923	8881	Asexual	5795
AMRU_Ao_CATCGGGAGCTTTGGT	10425	7836	Male	9115
AMRU_Ao_CATCGGGCAGATTGCT	6503	5196	Asexual	2814
AMRU_Ao_CATCGGGCATCTGGTA	4904	3924	Asexual	2117
AMRU_Ao_CATCGGGGTCTAACGT	12002	8999	Asexual	3405
AMRU_Ao_CATCGGGGTCTAGCCG	10708	7151	Asexual	5155
AMRU_Ao_CATCGGGGTTCAGACT	14927	11717	Asexual	3127
AMRU_Ao_CATGACAAGGATGCGT	16429	12660	Asexual	3640
AMRU_Ao_CATGACACAGACGCAA	20571	12819	Asexual	5746
AMRU_Ao_CATGACAGTAGGCTGA	16510	10671	Asexual	6042
AMRU_Ao_CATGACATCATCGCTC	15116	11315	Asexual	4088
AMRU_Ao_CATGCCTAGAGTGAGA	13721	8412	Asexual	6349
AMRU_Ao_CATGCCTAGTTACGGG	4229	3259	Asexual	45
AMRU_Ao_CATGCCTGTATTCTCT	14373	10103	Asexual	4597
AMRU_Ao_CATGGCGCAGTAAGCG	19559	14570	Asexual	4329
AMRU_Ao_CATGGCGGTCAACATC	7037	4838	Asexual	5154
AMRU_Ao_CATGGCGTCAACGGGA	10576	8329	Asexual	2716
AMRU_Ao_CATGGCGTCCATGCTC	4713	3581	Asexual	6769
AMRU_Ao_CATGGCGTCCCACTTG	7950	6240	Asexual	2686
AMRU_Ao_CATTATCAGATAGCAT	11936	9199	Asexual	2164
AMRU_Ao_CATTATCCAATCACAC	15787	12464	Asexual	2645
AMRU_Ao_CATTATCCAGGACCCT	33308	28101	Female	8816
AMRU_Ao_CATTATCCAGGGTACA	8723	6620	Asexual	2481
AMRU_Ao_CATTATCTCATGGTCA	8085	5813	Asexual	6980
AMRU_Ao_CATTATCTCCAGTAGT	16375	11795	Asexual	4941
AMRU_Ao_CATTATCTCGGCGGTT	4221	3230	Asexual	69
AMRU_Ao_CATTCGCCAAGCCGCT	9928	6775	Asexual	5082
AMRU_Ao_CATTCGCCATCAGTAC	14677	11847	Asexual	3258
AMRU_Ao_CATTCGCCATGTAAGA	7535	5749	Asexual	2647
AMRU_Ao_CATTCGCGTGCCTGCA	15798	12346	Asexual	3403
AMRU_Ao_CATTCGCTCAAACGGG	10251	7993	Asexual	2445
AMRU_Ao_CCAATCCAGTCAATAG	10887	8173	Asexual	3890
AMRU_Ao_CCAATCCGTACCATCA	37026	31028	Female	8738
AMRU_Ao_CCAATCCGTTGCTCCT	14421	9435	Asexual	5472
AMRU_Ao_CCACCTAAGCCAACAG	22447	17168	Asexual	4038
AMRU_Ao_CCACCTAGTGACAAAT	4783	3847	Female	8203
AMRU_Ao_CCACCTAGTTGTTTGG	2707	1860	Asexual	4956
AMRU_Ao_CCACCTATCAACCAAC	10424	7464	Male	9072
AMRU_Ao_CCACCTATCCTCAATT	33959	28977	Female	8934
AMRU_Ao_CCACGGAAGAGACTAT	5413	4050	Asexual	365
AMRU_Ao_CCACGGACACAACGCC	11604	3048	Asexual	7363
AMRU_Ao_CCACGGACACCAACCG	15102	10266	Asexual	5172
AMRU_Ao_CCACGGAGTTCTCATT	16253	12637	Asexual	2284
AMRU_Ao_CCACTACCAACAACCT	34640	29422	Female	8693
AMRU_Ao_CCACTACGTGCCTGGT	14498	11276	Asexual	3648
AMRU_Ao_CCACTACTCTATCCTA	15943	11718	Asexual	4269
AMRU_Ao_CCAGCGAAGAGCAATT	16585	12713	Asexual	3774
AMRU_Ao_CCAGCGAGTAAGGGCT	4700	3151	Asexual	401
AMRU_Ao_CCAGCGAGTCGGATCC	5481	4171	Asexual	4186
AMRU_Ao_CCATGTCGTGCGATAG	8701	7039	Asexual	2210
AMRU_Ao_CCATGTCTCCAACCAA	18501	14297	Female	7809
AMRU_Ao_CCATGTCTCCGCATCT	4808	3757	Asexual	4100
AMRU_Ao_CCATTCGAGTGTCCCG	17384	12494	Asexual	4577
AMRU_Ao_CCATTCGCAGTGAGTG	28640	23860	Female	8438
AMRU_Ao_CCATTCGGTTATGCGT	19620	13512	Asexual	5243
AMRU_Ao_CCATTCGTCGTTGACA	9730	7591	Asexual	1879
AMRU_Ao_CCCAATCAGCGTCAAG	6352	5320	Asexual	2285
AMRU_Ao_CCCAATCCACGACTCG	33195	27929	Female	8765
AMRU_Ao_CCCAATCGTCAATGTC	8037	6212	Asexual	2997
AMRU_Ao_CCCAATCGTTCCTCCA	11705	9005	Asexual	3498
AMRU_Ao_CCCAATCTCCGCGCAA	8300	5987	Asexual	4465
AMRU_Ao_CCCAATCTCTACCTGC	12433	7737	Asexual	6046
AMRU_Ao_CCCATACCAGATCTGT	11646	8651	Asexual	4568
AMRU_Ao_CCCATACCAGCCTTGG	4725	1245	Asexual	7535
AMRU_Ao_CCCATACGTAGGACAC	10898	8441	Asexual	21
AMRU_Ao_CCCATACTCTGAAAGA	8753	5384	Asexual	5040
AMRU_Ao_CCCATACTCTTGTTTG	13458	10220	Asexual	4642
AMRU_Ao_CCCTCCTTCAAGAAGT	8220	5859	Asexual	6899
AMRU_Ao_CCCTCCTTCGGAAACG	26042	21390	Female	7985
AMRU_Ao_CCCTCCTTCTATCCTA	17650	11530	Asexual	5560
AMRU_Ao_CCCTCCTTCTCAAACG	19064	15197	Asexual	3215
AMRU_Ao_CCCTCCTTCTTATCTG	16164	9838	Asexual	6256
AMRU_Ao_CCGGGATAGCGTTCCG	9830	7739	Female	7613
AMRU_Ao_CCGGGATAGTACGCCC	6755	5299	Asexual	2034
AMRU_Ao_CCGGGATCAACTTGAC	14664	8998	Asexual	6241
AMRU_Ao_CCGGGATCAGCCTTGG	15750	10714	Asexual	5616
AMRU_Ao_CCGGGATCATAAGACA	10840	8103	Asexual	3824
AMRU_Ao_CCGGGATGTTCGAATC	3846	2867	Asexual	3319
AMRU_Ao_CCGGGATTCATAAAGG	17531	13762	Asexual	2831
AMRU_Ao_CCGGGATTCCATGAAC	4177	3232	Asexual	708
AMRU_Ao_CCGGGATTCTTGTCAT	12374	9572	Asexual	383
AMRU_Ao_CCGGTAGTCTTTCCTC	27777	23257	Female	8739
AMRU_Ao_CCGTACTCAGTGGGAT	4574	3600	Asexual	7
AMRU_Ao_CCGTACTCATACAGCT	11195	8773	Asexual	2460
AMRU_Ao_CCGTACTGTGAAATCA	21939	18443	Female	8320
AMRU_Ao_CCGTGGAAGCGTTTAC	18413	12222	Asexual	5470
AMRU_Ao_CCGTGGAAGCTGAACG	12691	9613	Asexual	2909
AMRU_Ao_CCGTGGAAGTCACGCC	10955	8200	Asexual	4562
AMRU_Ao_CCGTGGACAGACAAGC	10592	8125	Asexual	4096
AMRU_Ao_CCGTGGAGTTGTCTTT	32115	26737	Female	8370
AMRU_Ao_CCGTGGATCAGTGTTG	5200	4002	Asexual	6
AMRU_Ao_CCGTGGATCGCACTCT	33007	28298	Female	8891
AMRU_Ao_CCGTTCAAGCGTAGTG	6086	4716	Asexual	2533
AMRU_Ao_CCGTTCAAGGTCATCT	20884	15190	Asexual	4757
AMRU_Ao_CCGTTCAAGGTTACCT	3838	2830	Asexual	3631
AMRU_Ao_CCGTTCAGTATCTGCA	11809	9517	Female	7652
AMRU_Ao_CCGTTCAGTTCCACAA	13894	10090	Asexual	4482
AMRU_Ao_CCGTTCATCAGCTGGC	31989	27234	Female	8777
AMRU_Ao_CCGTTCATCCATGAAC	16929	13328	Asexual	3388
AMRU_Ao_CCTAAAGAGAGCCTAG	10746	5963	Asexual	6141
AMRU_Ao_CCTAAAGCACCCTATC	13244	10440	Asexual	2081
AMRU_Ao_CCTAAAGCATGGGAAC	8084	6540	Asexual	661
AMRU_Ao_CCTACACAGTAATCCC	17752	13714	Asexual	2181
AMRU_Ao_CCTACACAGTACGCGA	15367	10333	Asexual	5192
AMRU_Ao_CCTACACTCGAACGGA	4300	3296	Asexual	3986
AMRU_Ao_CCTACCAAGAGTAATC	12393	9968	Asexual	1983
AMRU_Ao_CCTACCAGTGTGGTTT	12344	9608	Asexual	3619
AMRU_Ao_CCTAGCTGTAGGCTGA	13938	10488	Asexual	3693
AMRU_Ao_CCTATTAGTGCAGTAG	9327	7394	Female	7821
AMRU_Ao_CCTATTATCCAAGTAC	13546	9294	Asexual	5326
AMRU_Ao_CCTATTATCGCATGGC	12225	8816	Asexual	100
AMRU_Ao_CCTCAGTAGAGAGCTC	8825	7213	Asexual	2979
AMRU_Ao_CCTCAGTGTAAGTGTA	13457	10003	Asexual	4282
AMRU_Ao_CCTCAGTGTACGCACC	19956	13215	Asexual	5412
AMRU_Ao_CCTCTGAAGCCAGAAC	17510	13663	Female	7859
AMRU_Ao_CCTCTGAAGTGTCCCG	13569	9142	Asexual	5828
AMRU_Ao_CCTCTGAGTCAAGCGA	8322	6304	Asexual	33
AMRU_Ao_CCTCTGATCATCGATG	4180	3180	Asexual	3753
AMRU_Ao_CCTTACGAGAAGATTC	26245	21326	Female	7973
AMRU_Ao_CCTTACGCAATACGCT	11972	7321	Asexual	5486
AMRU_Ao_CCTTACGGTTATCACG	10349	7750	Male	9119
AMRU_Ao_CCTTACGTCAGTTAGC	10360	6160	Asexual	5410
AMRU_Ao_CCTTACGTCATGTCCC	22117	18166	Female	8479
AMRU_Ao_CCTTCCCGTGGCCCTA	16659	10599	Asexual	6270
AMRU_Ao_CCTTCGAAGGAGCGTT	29151	24484	Female	8834
AMRU_Ao_CCTTTCTAGTGTTAGA	15854	10749	Asexual	5208
AMRU_Ao_CCTTTCTGTTCCAACA	8531	6687	Asexual	2508
AMRU_Ao_CCTTTCTGTTGATTGC	12044	8752	Asexual	4456
AMRU_Ao_CGAACATAGTAGGTGC	12487	9653	Asexual	2474
AMRU_Ao_CGAACATCAAGCCGCT	10226	8063	Asexual	3296
AMRU_Ao_CGAACATGTTACCAGT	14528	10530	Asexual	4307
AMRU_Ao_CGAACATTCTGTCTCG	15858	11831	Asexual	734
AMRU_Ao_CGAATGTCAGTAAGCG	3889	2512	Asexual	5143
AMRU_Ao_CGAATGTGTCGAAAGC	12558	9002	Asexual	4302
AMRU_Ao_CGAATGTTCGAGGTAG	14853	9962	Asexual	5384
AMRU_Ao_CGACCTTAGAAGGGTA	10520	6231	Asexual	6343
AMRU_Ao_CGACCTTAGGACAGAA	28804	23301	Female	8021
AMRU_Ao_CGACCTTGTCAACATC	5062	3921	Asexual	106
AMRU_Ao_CGACCTTGTCCAACTA	33674	28838	Female	8909
AMRU_Ao_CGACCTTGTGTAATGA	12012	9240	Asexual	2563
AMRU_Ao_CGAGAAGCAAGCCGTC	13462	10244	Asexual	3095
AMRU_Ao_CGAGAAGCAATCGAAA	16452	10105	Asexual	5824
AMRU_Ao_CGAGCACCACAACGTT	6511	4294	Asexual	6126
AMRU_Ao_CGAGCACTCCATGAGT	13739	10546	Asexual	1335
AMRU_Ao_CGAGCACTCTCGCATC	29535	25007	Female	8776
AMRU_Ao_CGAGCCAAGAGACGAA	17907	13970	Asexual	4098
AMRU_Ao_CGAGCCAAGGGAGTAA	3870	2932	Asexual	1495
AMRU_Ao_CGAGCCACAAGAAAGG	17875	13886	Asexual	3997
AMRU_Ao_CGAGCCAGTTGTGGCC	14932	9658	Asexual	5383
AMRU_Ao_CGAGCCATCTACCAGA	13327	10322	Asexual	2489
AMRU_Ao_CGATCGGCAAGCCTAT	6863	5181	Asexual	3070
AMRU_Ao_CGATCGGGTAGCGATG	14535	8986	Asexual	6104
AMRU_Ao_CGATCGGGTGTAACGG	29493	24754	Female	8602
AMRU_Ao_CGATCGGTCATTCACT	24626	19883	Asexual	3655
AMRU_Ao_CGATCGGTCCAGTAGT	10727	7619	Asexual	6968
AMRU_Ao_CGATGGCAGACCGGAT	11351	8354	Asexual	4034
AMRU_Ao_CGATGGCAGATACACA	34818	29143	Female	8619
AMRU_Ao_CGATGGCCACAACGCC	10395	8079	Asexual	2016
AMRU_Ao_CGATGGCCAGGGTATG	5369	4232	Asexual	245
AMRU_Ao_CGATGGCCAGTCTTCC	10882	8377	Asexual	2415
AMRU_Ao_CGATGGCTCAGGTAAA	9521	5569	Asexual	7039
AMRU_Ao_CGATGGCTCATTTGGG	4416	3518	Asexual	4156
AMRU_Ao_CGATGTAAGGAGCGTT	17613	13158	Asexual	3488
AMRU_Ao_CGATGTACAGGAATGC	21925	15752	Asexual	4724
AMRU_Ao_CGATGTACAGGATTGG	11592	9099	Asexual	3163
AMRU_Ao_CGATGTATCGGTTCGG	18091	15255	Female	8448
AMRU_Ao_CGATTGAAGAAAGTGG	5888	4336	Asexual	428
AMRU_Ao_CGATTGAAGGCGCTCT	5798	4858	Female	8623
AMRU_Ao_CGATTGAAGTGAACGC	13213	10507	Asexual	3000
AMRU_Ao_CGATTGATCGAATGGG	13545	10436	Asexual	2426
AMRU_Ao_CGATTGATCGCCATAA	15744	12064	Asexual	3035
AMRU_Ao_CGCCAAGAGCGCCTTG	15169	12460	Female	8100
AMRU_Ao_CGCGGTAAGGGCATGT	5326	4519	Female	8758
AMRU_Ao_CGCGGTAAGTACGCGA	23115	19145	Female	8199
AMRU_Ao_CGCGGTAGTCGCCATG	9004	6940	Asexual	3954
AMRU_Ao_CGCGGTAGTTCACCTC	15772	12353	Asexual	3685
AMRU_Ao_CGCGTTTCACGAAATA	9478	6434	Asexual	4924
AMRU_Ao_CGCGTTTCAGTTTACG	35645	30157	Female	8711
AMRU_Ao_CGCTATCAGCAGACTG	10552	8085	Asexual	2916
AMRU_Ao_CGCTATCCAACCGCCA	3217	2250	Asexual	6967
AMRU_Ao_CGCTATCGTACATCCA	18077	12205	Asexual	5289
AMRU_Ao_CGCTGGAAGGCTAGGT	4590	3213	Asexual	741
AMRU_Ao_CGCTGGACAGCTGGCT	17800	13209	Asexual	4202
AMRU_Ao_CGCTGGATCTAGAGTC	29655	24421	Female	8236
AMRU_Ao_CGCTTCACAGCGATCC	9045	7028	Asexual	4091
AMRU_Ao_CGCTTCAGTCAACTGT	3158	1958	Asexual	5354
AMRU_Ao_CGCTTCAGTCACAAGG	10140	7864	Asexual	1309
AMRU_Ao_CGCTTCATCCGCTGTT	9072	7258	Asexual	2319
AMRU_Ao_CGGACACAGACAGGCT	4748	1770	Asexual	7185
AMRU_Ao_CGGACACGTTCCACGG	12295	9159	Asexual	2374
AMRU_Ao_CGGACACGTTTAAGCC	13152	9467	Asexual	4514
AMRU_Ao_CGGACACTCTTGCAAG	33898	29238	Female	8894
AMRU_Ao_CGGACGTGTGCACGAA	10088	7419	Asexual	4143
AMRU_Ao_CGGACGTGTGCGGTAA	13804	10355	Asexual	4390
AMRU_Ao_CGGAGCTAGTATTGGA	10794	7635	Asexual	5048
AMRU_Ao_CGGAGCTGTAAATGTG	18956	14572	Asexual	4148
AMRU_Ao_CGGAGCTGTCTCGTTC	8915	7291	Female	8041
AMRU_Ao_CGGAGCTGTGAAAGAG	17628	12957	Asexual	3909
AMRU_Ao_CGGAGCTTCATCATTC	14644	11125	Asexual	4078
AMRU_Ao_CGGAGCTTCTCTGTCG	28883	24341	Female	8653
AMRU_Ao_CGGCTAGAGAGTAAGG	8047	6277	Asexual	1637
AMRU_Ao_CGGCTAGAGTATCGAA	14496	10959	Asexual	1394
AMRU_Ao_CGGCTAGGTATGAATG	29608	24863	Female	8871
AMRU_Ao_CGGGTCAAGGTTCCTA	35965	30108	Female	8969
AMRU_Ao_CGGGTCAAGTGTACGG	14079	10824	Asexual	2669
AMRU_Ao_CGGGTCACAACCGCCA	18152	13989	Asexual	3599
AMRU_Ao_CGGGTCACAACTTGAC	10560	8044	Asexual	839
AMRU_Ao_CGGGTCACAGTGGGAT	14267	10605	Asexual	3747
AMRU_Ao_CGGGTCAGTTAGATGA	22884	17504	Asexual	2868
AMRU_Ao_CGTAGCGAGGTGCACA	5447	3777	Asexual	4555
AMRU_Ao_CGTAGCGAGTACCGGA	10934	6787	Asexual	5328
AMRU_Ao_CGTAGCGCAATCGAAA	9097	6405	Asexual	6780
AMRU_Ao_CGTAGCGTCACCACCT	37498	30847	Female	8394
AMRU_Ao_CGTAGCGTCCACGTTC	16693	11985	Asexual	4556
AMRU_Ao_CGTAGCGTCCATGAAC	14949	11101	Asexual	4254
AMRU_Ao_CGTAGCGTCCCGGATG	36435	30502	Female	8244
AMRU_Ao_CGTAGCGTCGGATGGA	8915	6056	Asexual	5075
AMRU_Ao_CGTAGGCAGACCTTTG	9520	7477	Asexual	3306
AMRU_Ao_CGTAGGCCAGGATTGG	13859	10628	Asexual	4454
AMRU_Ao_CGTCACTCAGGCTCAC	6443	4409	Asexual	5331
AMRU_Ao_CGTCACTGTCTGATTG	11168	7179	Asexual	6538
AMRU_Ao_CGTCACTGTGCATCTA	9141	6416	Asexual	4938
AMRU_Ao_CGTCAGGAGCTAACAA	15206	10864	Asexual	4537
AMRU_Ao_CGTCAGGCACGCCAGT	13558	10431	Asexual	3912
AMRU_Ao_CGTCAGGCACTGCCAG	35378	30068	Female	8832
AMRU_Ao_CGTCAGGGTACGAAAT	11776	7249	Asexual	5835
AMRU_Ao_CGTCAGGGTTCGAATC	13428	10359	Asexual	1917
AMRU_Ao_CGTCCATAGAACTGTA	3531	2566	Asexual	4493
AMRU_Ao_CGTCCATAGGTGCACA	9444	5678	Asexual	5467
AMRU_Ao_CGTCCATCAAGTTAAG	11011	8085	Asexual	3966
AMRU_Ao_CGTCCATGTGTTTGGT	11232	8757	Asexual	3773
AMRU_Ao_CGTCTACAGAGTAAGG	15360	10837	Asexual	4884
AMRU_Ao_CGTCTACCAAGCGAGT	6912	5478	Asexual	1908
AMRU_Ao_CGTGAGCAGTCTCGGC	31388	26108	Female	8525
AMRU_Ao_CGTGAGCAGTGCGTGA	11102	9057	Asexual	2224
AMRU_Ao_CGTGAGCGTATCTGCA	14694	11597	Asexual	2871
AMRU_Ao_CGTGAGCGTGCATCTA	5229	3950	Asexual	73
AMRU_Ao_CGTGAGCTCCTTGCCA	16903	12410	Asexual	4291
AMRU_Ao_CGTGTAAAGTGCCAGA	7710	4700	Asexual	6184
AMRU_Ao_CGTGTAAGTCAGAATA	12464	9115	Asexual	4728
AMRU_Ao_CGTGTCTTCCAAATGC	13648	9659	Asexual	4821
AMRU_Ao_CGTTAGAAGGACGAAA	9237	6997	Asexual	4125
AMRU_Ao_CGTTAGATCACCATAG	13587	10361	Asexual	2914
AMRU_Ao_CGTTCTGCAGTACACT	19274	16303	Female	8868
AMRU_Ao_CGTTGGGCACTTAAGC	5432	3793	Asexual	4964
AMRU_Ao_CGTTGGGGTCCCGACA	33000	27636	Female	8194
AMRU_Ao_CGTTGGGTCACCGGGT	29118	24624	Female	8903
AMRU_Ao_CTAACTTCAAACAACA	15106	11513	Asexual	4262
AMRU_Ao_CTAACTTCACGTCTCT	31265	26169	Female	8163
AMRU_Ao_CTAACTTCACTTCTGC	6788	5386	Asexual	1878
AMRU_Ao_CTAAGACGTAGGCTGA	25075	21230	Female	8766
AMRU_Ao_CTAATGGAGATATGCA	9934	7908	Female	7804
AMRU_Ao_CTAATGGCAGATGGCA	24338	20206	Female	8663
AMRU_Ao_CTAATGGCAGGGTTAG	9816	7883	Asexual	2443
AMRU_Ao_CTAATGGGTAGCTCCG	19130	15153	Female	7810
AMRU_Ao_CTAATGGTCTCTTATG	7510	6320	Female	8848
AMRU_Ao_CTACACCCACCGAATT	11549	9254	Asexual	3595
AMRU_Ao_CTACACCCACTATCTT	17194	12920	Asexual	3793
AMRU_Ao_CTACATTAGTGCCAGA	12828	9487	Asexual	4029
AMRU_Ao_CTACATTCAAGCCTAT	9599	7911	Asexual	2758
AMRU_Ao_CTACATTCACAGTCGC	22797	17305	Asexual	3880
AMRU_Ao_CTACATTGTCTGATTG	14038	8429	Asexual	6272
AMRU_Ao_CTACATTTCACCTCGT	34288	29033	Female	8826
AMRU_Ao_CTACATTTCAGCTGGC	8518	6680	Asexual	3096
AMRU_Ao_CTACCCAAGATGAGAG	11498	9113	Asexual	2098
AMRU_Ao_CTACCCACAAGACACG	16123	12334	Asexual	3906
AMRU_Ao_CTACCCATCACCAGGC	6823	2025	Asexual	7352
AMRU_Ao_CTACCCATCATTCACT	10669	8266	Asexual	3760
AMRU_Ao_CTACGTCAGTTATCGC	6128	4294	Asexual	7095
AMRU_Ao_CTACGTCCACAACTGT	15104	10550	Asexual	4919
AMRU_Ao_CTACGTCGTTCAGCGC	8857	7468	Female	8178
AMRU_Ao_CTACGTCGTTGCCTCT	8995	7162	Asexual	1546
AMRU_Ao_CTACGTCTCGTAGGTT	8929	7191	Asexual	3718
AMRU_Ao_CTAGAGTGTCCGTGAC	13949	4072	Asexual	7355
AMRU_Ao_CTAGCCTAGCCAGTAG	13530	10430	Asexual	3825
AMRU_Ao_CTAGCCTAGTACCGGA	17079	13302	Female	7817
AMRU_Ao_CTAGCCTCAGCGTTCG	10603	7080	Asexual	5558
AMRU_Ao_CTAGCCTTCTTGTATC	7288	5516	Asexual	201
AMRU_Ao_CTAGTGAAGAGAGCTC	13128	10054	Asexual	4218
AMRU_Ao_CTAGTGAAGATGCCTT	13401	10004	Asexual	4144
AMRU_Ao_CTAGTGACAGCTGTAT	14489	11536	Asexual	3429
AMRU_Ao_CTAGTGATCACTGGGC	13405	10803	Asexual	2584
AMRU_Ao_CTAGTGATCTGTCCGT	19712	14515	Asexual	4420
AMRU_Ao_CTCACACCAGCCTATA	13946	10244	Asexual	3749
AMRU_Ao_CTCAGAAAGAGGGCTT	21244	17784	Female	8316
AMRU_Ao_CTCAGAAAGGTGCAAC	31009	26041	Female	8812
AMRU_Ao_CTCAGAACAACGATCT	7228	5702	Asexual	3325
AMRU_Ao_CTCAGAACATCTCCCA	31845	26736	Female	8237
AMRU_Ao_CTCAGAACATCTCGCT	17735	13771	Asexual	3641
AMRU_Ao_CTCAGAAGTAAGTTCC	14023	10964	Asexual	3895
AMRU_Ao_CTCAGAAGTAGCGTCC	3259	1914	NA	NA
AMRU_Ao_CTCAGAAGTGAGTGAC	13536	10636	Asexual	2444
AMRU_Ao_CTCATTACAACGATCT	14557	8881	Asexual	6128
AMRU_Ao_CTCATTACAGTTCATG	31896	27069	Female	8659
AMRU_Ao_CTCATTAGTACAGACG	14773	11611	Asexual	3913
AMRU_Ao_CTCATTATCCGCGTTT	11975	8882	Asexual	3312
AMRU_Ao_CTCATTATCGGAAATA	17810	13801	Asexual	1273
AMRU_Ao_CTCCTAGCAAATACAG	36928	30052	Female	8023
AMRU_Ao_CTCCTAGGTCCGAACC	16749	12694	Asexual	3927
AMRU_Ao_CTCCTAGTCACTTCAT	36145	30652	Female	8580
AMRU_Ao_CTCCTAGTCGTTGACA	17516	12153	Asexual	5327
AMRU_Ao_CTCGAAACAATGTAAG	25075	21324	Female	8331
AMRU_Ao_CTCGAAACACAGTCGC	19679	12763	Asexual	5508
AMRU_Ao_CTCGAAATCGATCCCT	15108	11953	Asexual	2994
AMRU_Ao_CTCGAGGGTGAACCTT	14673	10057	Asexual	6656
AMRU_Ao_CTCGAGGGTTGGAGGT	14343	11164	Asexual	3686
AMRU_Ao_CTCGAGGTCAGTTAGC	9577	7298	Asexual	1456
AMRU_Ao_CTCGGAGAGGCAATTA	17750	11244	Asexual	5920
AMRU_Ao_CTCGGAGGTAGCGCTC	10231	7505	Asexual	2302
AMRU_Ao_CTCGGAGGTTTGGGCC	15277	9823	Asexual	5394
AMRU_Ao_CTCGGGATCGCGGATC	3390	1753	Asexual	7220
AMRU_Ao_CTCGTACAGGGAAACA	18293	15720	Female	8491
AMRU_Ao_CTCGTACCACAACGCC	12156	9318	Asexual	1487
AMRU_Ao_CTCGTCAGTTCGGGCT	11965	9282	Asexual	3449
AMRU_Ao_CTCGTCATCCTCTAGC	13341	10009	Asexual	3634
AMRU_Ao_CTCGTCATCGCTAGCG	5836	4107	Asexual	4279
AMRU_Ao_CTCTAATAGCAATATG	13967	10663	Male	9079
AMRU_Ao_CTCTAATAGTAGCGGT	13289	8620	Asexual	5804
AMRU_Ao_CTCTAATGTCCAGTAT	32005	26956	Female	8867
AMRU_Ao_CTCTACGAGACTGTAA	5922	4483	Asexual	20
AMRU_Ao_CTCTACGCAAAGGCGT	4209	3210	Asexual	216
AMRU_Ao_CTCTACGCAATGTTGC	6097	4616	Asexual	3919
AMRU_Ao_CTCTACGGTAGGCATG	12421	9349	Asexual	3616
AMRU_Ao_CTCTGGTCAGTGGGAT	15022	10339	Asexual	4994
AMRU_Ao_CTGAAACAGTCATCCA	7836	5684	Asexual	17
AMRU_Ao_CTGAAACAGTTAACGA	7338	5912	Asexual	2730
AMRU_Ao_CTGAAACCACGAAGCA	21838	15664	Asexual	4596
AMRU_Ao_CTGAAACCAGCTGTGC	12821	9868	Asexual	3330
AMRU_Ao_CTGAAACCAGTCGATT	16420	12572	Asexual	4197
AMRU_Ao_CTGAAACGTCAGATAA	18571	12096	Asexual	5776
AMRU_Ao_CTGAAACTCGGGAGTA	15025	11599	Asexual	3507
AMRU_Ao_CTGAAGTCACACCGAC	5063	3922	Asexual	4220
AMRU_Ao_CTGAAGTCACAGCCCA	12390	8991	Asexual	4659
AMRU_Ao_CTGAAGTTCACTGGGC	14496	9678	Asexual	6279
AMRU_Ao_CTGATAGAGATATGCA	14036	10654	Asexual	4461
AMRU_Ao_CTGATAGAGCTCCTTC	18870	13092	Asexual	6001
AMRU_Ao_CTGATAGGTACGCACC	21714	14908	Asexual	5582
AMRU_Ao_CTGATAGGTATTCGTG	6184	4494	Asexual	5098
AMRU_Ao_CTGATCCGTAACGACG	15843	10065	Asexual	5789
AMRU_Ao_CTGATCCGTACGCTGC	4963	4245	Female	8552
AMRU_Ao_CTGATCCGTTGAACTC	10663	8205	Asexual	3500
AMRU_Ao_CTGATCCTCTGCTGTC	12738	7860	Asexual	6406
AMRU_Ao_CTGCCTAAGCACCGCT	8599	6607	Asexual	2900
AMRU_Ao_CTGCCTAAGCTGCAAG	10009	7403	Asexual	4266
AMRU_Ao_CTGCCTACAGGCTGAA	16692	12513	Asexual	3654
AMRU_Ao_CTGCGGAAGAATTCCC	6735	4900	Asexual	3923
AMRU_Ao_CTGCTGTGTATAGGGC	18617	14767	Asexual	3477
AMRU_Ao_CTGCTGTGTATGGTTC	31333	26395	Female	8592
AMRU_Ao_CTGCTGTTCGTGGACC	26114	22224	Female	8575
AMRU_Ao_CTGGTCTCACCCTATC	13489	10208	Asexual	4228
AMRU_Ao_CTGGTCTGTCGTCTTC	10373	7912	Asexual	2985
AMRU_Ao_CTGTGCTAGGCACATG	15438	9989	Asexual	6613
AMRU_Ao_CTGTGCTAGTTAAGTG	4371	3507	Asexual	13
AMRU_Ao_CTGTGCTGTGGCAAAC	24172	18228	Asexual	3931
AMRU_Ao_CTGTGCTTCGGAGCAA	8659	6928	Asexual	2578
AMRU_Ao_CTGTTTAAGTCTCGGC	6235	5080	Asexual	3452
AMRU_Ao_CTGTTTACAGCTCCGA	15231	11639	Asexual	3130
AMRU_Ao_CTGTTTAGTATGAAAC	11794	7860	Asexual	5752
AMRU_Ao_CTGTTTAGTCTAGAGG	7713	6099	Asexual	3885
AMRU_Ao_CTGTTTAGTGCCTTGG	20243	16223	Asexual	3707
AMRU_Ao_CTGTTTATCCGGGTGT	11041	8460	Asexual	3524
AMRU_Ao_CTGTTTATCTGCAGTA	10927	8688	Asexual	3316
AMRU_Ao_CTTAACTAGAGCTGGT	12186	9663	Asexual	1119
AMRU_Ao_CTTAACTTCACATGCA	22834	19018	Female	8321
AMRU_Ao_CTTAACTTCTACTATC	8313	6396	Asexual	6896
AMRU_Ao_CTTACCGAGCCGCCTA	10984	8378	Asexual	1988
AMRU_Ao_CTTACCGCACTCAGGC	17645	12612	Asexual	4763
AMRU_Ao_CTTACCGTCACAATGC	11559	8449	Asexual	4668
AMRU_Ao_CTTACCGTCCCTGACT	15837	12166	Asexual	3732
AMRU_Ao_CTTAGGATCTTCTGGC	13798	8666	Asexual	5786
AMRU_Ao_CTTCTCTGTAGAGCTG	20950	13834	Asexual	5270
AMRU_Ao_CTTCTCTGTGTCAATC	9700	7044	Asexual	6640
AMRU_Ao_CTTGGCTAGACGACGT	10745	4528	Asexual	7227
AMRU_Ao_CTTGGCTAGTCCATAC	36227	30520	Female	8818
AMRU_Ao_CTTGGCTCAACTGCGC	14133	11029	Asexual	2310
AMRU_Ao_CTTGGCTGTAGTACCT	12941	10297	Asexual	2406
AMRU_Ao_CTTGGCTGTCGAATCT	13613	10547	Asexual	2704
AMRU_Ao_CTTGGCTGTCGACTAT	10833	8379	Asexual	2152
AMRU_Ao_CTTGGCTGTTAAAGAC	17909	11514	Asexual	5499
AMRU_Ao_CTTGGCTTCAGTTTGG	4683	3470	Asexual	802
AMRU_Ao_CTTGGCTTCCGTTGTC	14508	10737	Asexual	4687
AMRU_Ao_CTTTGCGAGTGTCCAT	15145	11511	Asexual	3505
AMRU_Ao_CTTTGCGCAGTGACAG	11278	7620	Asexual	5240
AMRU_Ao_CTTTGCGGTAATTGGA	11772	8071	Asexual	5024
AMRU_Ao_CTTTGCGTCTCTGCTG	4022	2452	Asexual	7121
AMRU_Ao_GAAACTCAGAGGTAGA	15403	11794	Asexual	3431
AMRU_Ao_GAAACTCAGTACGATA	28658	24174	Female	8549
AMRU_Ao_GAAACTCAGTGTCCAT	14786	10217	Asexual	4907
AMRU_Ao_GAAACTCCACACATGT	16803	12622	Asexual	4007
AMRU_Ao_GAAACTCGTCGCGGTT	13568	10527	Asexual	3531
AMRU_Ao_GAAACTCGTTAAGATG	6412	5157	Asexual	2608
AMRU_Ao_GAAATGACACAGGTTT	11603	8371	Asexual	4955
AMRU_Ao_GAAATGACAGATTGCT	10658	8015	Asexual	3148
AMRU_Ao_GAAATGAGTACAGCAG	12596	9477	Asexual	3970
AMRU_Ao_GAAATGATCGTGACAT	17510	13379	Asexual	3856
AMRU_Ao_GAACATCAGAAGGGTA	13204	10144	Asexual	125
AMRU_Ao_GAACATCAGGATCGCA	15423	11873	Asexual	2040
AMRU_Ao_GAACATCCAGTATGCT	13828	10702	Asexual	2221
AMRU_Ao_GAACATCGTCCCTTGT	6081	5129	Female	8916
AMRU_Ao_GAACATCTCGCCAAAT	6195	4189	Asexual	5022
AMRU_Ao_GAACCTAAGCCTATGT	18387	12366	Asexual	5330
AMRU_Ao_GAACCTACAAAGAATC	9195	6409	Asexual	4605
AMRU_Ao_GAACCTACAAGTCTGT	9311	7045	Asexual	3374
AMRU_Ao_GAACCTACATGCTAGT	10741	6879	Asexual	6467
AMRU_Ao_GAACGGAAGTTCGATC	3841	2926	Asexual	6667
AMRU_Ao_GAACGGACAAGCCCAC	8497	6672	Asexual	1023
AMRU_Ao_GAACGGACAAGGTTCT	32540	27193	Female	8431
AMRU_Ao_GAACGGACACAGGTTT	18183	12738	Asexual	5021
AMRU_Ao_GAACGGAGTGAGTGAC	13912	9941	Asexual	4590
AMRU_Ao_GAAGCAGAGACTCGGA	16659	12233	Asexual	4707
AMRU_Ao_GAAGCAGAGGCGTACA	6446	5103	Asexual	1615
AMRU_Ao_GAAGCAGAGTGGTAGC	13560	8188	Asexual	6203
AMRU_Ao_GAAGCAGCACTGTTAG	10668	8337	Asexual	1327
AMRU_Ao_GAAGCAGCAGTCACTA	6235	4873	Asexual	2962
AMRU_Ao_GAAGCAGTCAGCTCTC	17437	14266	Female	8523
AMRU_Ao_GAAGCAGTCTTGACGA	6656	4704	Asexual	5087
AMRU_Ao_GAATAAGGTACTCAAC	13170	9419	Asexual	5023
AMRU_Ao_GAATAAGGTAGCAAAT	6540	3839	NA	NA
AMRU_Ao_GAATGAAAGCTCCTCT	5360	3663	Asexual	6978
AMRU_Ao_GAATGAAAGTGGTAAT	11522	8871	Asexual	1627
AMRU_Ao_GAATGAACACGGATAG	13071	9336	Asexual	4975
AMRU_Ao_GAATGAACATCCAACA	6645	1980	Asexual	7301
AMRU_Ao_GAATGAATCACAACGT	7850	6267	Asexual	2872
AMRU_Ao_GACACGCAGGCGATAC	13018	10413	Asexual	2078
AMRU_Ao_GACACGCCATGCCCGA	12450	9964	Asexual	2505
AMRU_Ao_GACACGCCATTACCTT	22111	18191	Female	8256
AMRU_Ao_GACACGCGTTACAGAA	27376	22786	Female	8677
AMRU_Ao_GACACGCTCGCCTGAG	4260	3085	Asexual	833
AMRU_Ao_GACAGAGTCGTACCGG	10251	7698	Asexual	4163
AMRU_Ao_GACCAATCACGAAACG	12119	9463	Asexual	2590
AMRU_Ao_GACCAATCATGTAAGA	17251	12355	Asexual	4622
AMRU_Ao_GACCAATGTAGCGTAG	11825	8819	Asexual	3755
AMRU_Ao_GACCTGGAGACAAGCC	14925	10244	Asexual	5079
AMRU_Ao_GACCTGGAGACATAAC	32412	27279	Female	8767
AMRU_Ao_GACCTGGAGCGACGTA	15369	11309	Asexual	4080
AMRU_Ao_GACCTGGAGTGGTAAT	16344	11652	Asexual	4359
AMRU_Ao_GACCTGGGTATAAACG	18415	13853	Asexual	4778
AMRU_Ao_GACCTGGGTTGCCTCT	23795	19577	Female	8150
AMRU_Ao_GACGCGTGTCGGATCC	5366	4573	Female	8668
AMRU_Ao_GACGCGTGTGAAAGAG	12219	8299	Asexual	5066
AMRU_Ao_GACGCGTGTGATAAGT	28129	23981	Female	8673
AMRU_Ao_GACGCGTTCATCTGTT	3973	3088	Asexual	4181
AMRU_Ao_GACGGCTAGGGATGGG	28993	24593	Female	8716
AMRU_Ao_GACGGCTAGGTCGGAT	13404	11382	Female	8354
AMRU_Ao_GACGGCTAGTGGACGT	8047	6429	Asexual	2449
AMRU_Ao_GACGGCTCACATCTTT	5694	3900	Asexual	5563
AMRU_Ao_GACGGCTTCCGCAAGC	11312	8626	Asexual	3547
AMRU_Ao_GACGGCTTCTGGTATG	28031	23224	Female	8630
AMRU_Ao_GACGTGCAGTGAAGTT	11652	8823	Asexual	3413
AMRU_Ao_GACGTGCCATTGTGCA	16616	12816	Asexual	2360
AMRU_Ao_GACGTGCGTACACCGC	5536	4094	Asexual	4686
AMRU_Ao_GACGTGCTCAGAGGTG	27722	23258	Female	8858
AMRU_Ao_GACGTTACAAGGTTTC	6302	4679	Asexual	2753
AMRU_Ao_GACGTTACAATGGATA	11997	9866	Asexual	1899
AMRU_Ao_GACGTTATCACCCTCA	18055	12933	Asexual	4771
AMRU_Ao_GACGTTATCCTGCTTG	3572	2830	Asexual	1886
AMRU_Ao_GACGTTATCTGAGGGA	4935	3722	Asexual	689
AMRU_Ao_GACGTTATCTGCCAGG	16414	12359	Asexual	3594
AMRU_Ao_GACTAACAGGCAGGTT	27833	23605	Female	8424
AMRU_Ao_GACTAACAGGCTAGCA	6905	4662	Asexual	6998
AMRU_Ao_GACTAACCACGAAACG	19001	14129	Asexual	4226
AMRU_Ao_GACTACAAGAAACGAG	6855	4806	Asexual	6608
AMRU_Ao_GACTACAAGATTACCC	8596	6759	Asexual	955
AMRU_Ao_GACTACATCAGGCAAG	13716	9383	Asexual	5917
AMRU_Ao_GACTACATCCCAAGAT	9912	7897	Asexual	2390
AMRU_Ao_GACTGCGAGCATGGCA	13788	10815	Asexual	3845
AMRU_Ao_GACTGCGGTGCACCAC	13951	9158	Asexual	5451
AMRU_Ao_GACTGCGTCCTGCCAT	7582	5448	Asexual	6934
AMRU_Ao_GAGCAGAAGAAGAAGC	25580	21573	Female	8378
AMRU_Ao_GAGCAGAAGTATTGGA	21055	16513	Female	7930
AMRU_Ao_GAGCAGACAAGGACTG	5786	4249	Asexual	359
AMRU_Ao_GAGCAGACAATGGACG	14850	11165	Asexual	3473
AMRU_Ao_GAGCAGATCAGAGCTT	17403	11188	Asexual	6547
AMRU_Ao_GAGCAGATCGGTCCGA	9915	7615	Asexual	3101
AMRU_Ao_GAGGTGAAGAGTAAGG	4818	3452	Asexual	4416
AMRU_Ao_GAGGTGAAGTGAACAT	8402	6279	Asexual	4752
AMRU_Ao_GAGGTGACACTAAGTC	26185	21038	Female	8080
AMRU_Ao_GAGGTGACAGACAGGT	3949	3036	Asexual	410
AMRU_Ao_GAGGTGAGTAGCGCAA	5161	3152	Asexual	5323
AMRU_Ao_GAGGTGAGTCACCTAA	16677	12904	Asexual	3831
AMRU_Ao_GAGTCCGAGGTTACCT	19662	14136	Asexual	4304
AMRU_Ao_GAGTCCGCAGCGTAAG	10639	8277	Asexual	2124
AMRU_Ao_GAGTCCGGTTCGGGCT	37161	31452	Female	8380
AMRU_Ao_GATCAGTAGCATCATC	15423	10532	Asexual	6595
AMRU_Ao_GATCAGTGTTAGGGTG	7980	3071	Asexual	7197
AMRU_Ao_GATCGATGTAGGACAC	15107	11052	Asexual	4473
AMRU_Ao_GATCGCGGTTAAAGAC	12905	7770	Asexual	5756
AMRU_Ao_GATCGCGTCCCGGATG	10253	4667	Asexual	7153
AMRU_Ao_GATCGTAAGTCATGCT	14875	10019	Asexual	5050
AMRU_Ao_GATCGTACAAACCTAC	24323	20051	Female	8510
AMRU_Ao_GATCGTACAGGTCTCG	13114	9393	Asexual	4716
AMRU_Ao_GATCGTAGTGAGGCTA	14773	11595	Female	7776
AMRU_Ao_GATCTAGCAAGTAATG	7875	6006	Asexual	1809
AMRU_Ao_GATCTAGCAGTCGTGC	17146	11757	Asexual	4620
AMRU_Ao_GATCTAGTCAAACGGG	4466	3497	Asexual	170
AMRU_Ao_GATCTAGTCTACCAGA	35125	29105	Female	8225
AMRU_Ao_GATGAAACAATCTGCA	8538	6936	Female	7665
AMRU_Ao_GATGAAACAGACGTAG	6089	5056	Asexual	1262
AMRU_Ao_GATGAAAGTAAAGGAG	17006	13666	Asexual	3557
AMRU_Ao_GATGAAAGTGAGTGAC	14378	11246	Asexual	1880
AMRU_Ao_GATGAAAGTTCGGGCT	5878	4212	Asexual	120
AMRU_Ao_GATGAAATCACTTACT	20953	16800	Asexual	3687
AMRU_Ao_GATGAAATCGTCTGCT	13823	10796	Asexual	3289
AMRU_Ao_GATGAAATCTATCCCG	17135	13133	Asexual	3361
AMRU_Ao_GATGAGGCAGACAAAT	9046	6890	Asexual	8
AMRU_Ao_GATGAGGCATATGCTG	16991	12968	Asexual	3394
AMRU_Ao_GATGAGGGTTAGTGGG	14415	11345	Asexual	3408
AMRU_Ao_GATGCTAAGTACGACG	18888	13037	Asexual	4940
AMRU_Ao_GATGCTACAAGAAAGG	3552	2758	Asexual	3583
AMRU_Ao_GATGCTACACGAGAGT	20231	15578	Asexual	3796
AMRU_Ao_GATGCTAGTACAGTTC	15625	11615	Asexual	4641
AMRU_Ao_GATGCTATCACATGCA	5415	4096	Asexual	80
AMRU_Ao_GATTCAGAGTATTGGA	28977	24435	Female	8587
AMRU_Ao_GCAAACTAGCGTAGTG	7079	5453	Asexual	3205
AMRU_Ao_GCAAACTCAGTAACGG	9152	6643	Asexual	4789
AMRU_Ao_GCAAACTCATGCGCAC	9566	7394	Asexual	3466
AMRU_Ao_GCAAACTTCATAGCAC	15550	11825	Asexual	3867
AMRU_Ao_GCAAACTTCGAGGTAG	3517	2712	Asexual	1876
AMRU_Ao_GCAAACTTCGTGGACC	10067	6772	Asexual	6689
AMRU_Ao_GCAATCACAACCGCCA	31802	26936	Female	8910
AMRU_Ao_GCAATCATCCGTTGTC	18144	14085	Asexual	3894
AMRU_Ao_GCACATAAGCAGGTCA	14674	10243	Asexual	5324
AMRU_Ao_GCACATAAGCGATAGC	20438	15196	Asexual	4281
AMRU_Ao_GCACATACATCGACGC	8354	6501	Asexual	1912
AMRU_Ao_GCACATAGTAATAGCA	7180	5198	Asexual	4857
AMRU_Ao_GCACATAGTACCAGTT	3213	2489	Female	7701
AMRU_Ao_GCACATAGTCTTGTCC	6228	4701	Asexual	4239
AMRU_Ao_GCACTCTCACCATCCT	20670	13978	Asexual	5812
AMRU_Ao_GCAGCCATCTTCTGGC	14973	9532	Asexual	6030
AMRU_Ao_GCAGTTATCCGTCATC	19901	13199	Asexual	5622
AMRU_Ao_GCATACACACCATCCT	15360	11319	Asexual	4200
AMRU_Ao_GCATGATCACTATCTT	6290	4607	Asexual	437
AMRU_Ao_GCATGATTCTCGAGTA	26560	22488	Female	8243
AMRU_Ao_GCATGATTCTTAGAGC	4385	3357	Asexual	4177
AMRU_Ao_GCATGCGAGAGCTGGT	19345	13249	Asexual	4873
AMRU_Ao_GCATGCGGTAAGTTCC	8341	6539	Asexual	1961
AMRU_Ao_GCATGCGGTTGAACTC	7642	6139	Asexual	1570
AMRU_Ao_GCATGCGGTTTAAGCC	5973	4072	Asexual	5388
AMRU_Ao_GCATGTAAGCTGTCTA	15699	12235	Asexual	1828
AMRU_Ao_GCATGTACACAACGCC	16686	12034	Asexual	4916
AMRU_Ao_GCATGTATCTTGACGA	7518	5674	Asexual	81
AMRU_Ao_GCCAAATAGCACGCCT	5961	4321	Asexual	4835
AMRU_Ao_GCCAAATTCAGAAATG	12723	8294	Asexual	5779
AMRU_Ao_GCCTCTACAGACGCAA	10684	7977	Asexual	4287
AMRU_Ao_GCCTCTACATGCTAGT	12311	7846	Asexual	6555
AMRU_Ao_GCCTCTAGTTCAGCGC	9433	7438	Asexual	1692
AMRU_Ao_GCGACCACATCGTCGG	13749	9221	Asexual	5012
AMRU_Ao_GCGACCAGTCAGATAA	12728	10051	Asexual	3150
AMRU_Ao_GCGACCAGTCCCGACA	11021	8475	Asexual	3559
AMRU_Ao_GCGACCAGTGTCAATC	14581	11032	Female	7624
AMRU_Ao_GCGAGAACAGACACTT	30251	25648	Female	8714
AMRU_Ao_GCGAGAAGTCGGGTCT	9353	7524	Asexual	2382
AMRU_Ao_GCGAGAATCTTCCTTC	18380	14163	Asexual	2952
AMRU_Ao_GCGCAACAGCCACCTG	16847	11483	Asexual	5888
AMRU_Ao_GCGCAACAGTCCGTAT	6524	4866	Asexual	1100
AMRU_Ao_GCGCAGTAGGCAAAGA	14895	11541	Asexual	3212
AMRU_Ao_GCGCAGTCAATGGAGC	18841	15065	Asexual	3638
AMRU_Ao_GCGCAGTGTCGCTTTC	36971	30803	Female	8418
AMRU_Ao_GCGCCAAAGGCTAGAC	10943	8148	Asexual	3953
AMRU_Ao_GCGCCAACACAAGACG	13699	10317	Asexual	1926
AMRU_Ao_GCGCGATAGAAGATTC	20722	16067	Asexual	3110
AMRU_Ao_GCGCGATAGTGAAGAG	11834	9271	Asexual	1599
AMRU_Ao_GCGCGATCAGTCCTTC	10687	6560	Asexual	5902
AMRU_Ao_GCGCGATGTCGGCTCA	22910	19267	Female	8078
AMRU_Ao_GCGCGATTCACAGTAC	27463	22899	Female	8807
AMRU_Ao_GCGGGTTAGCAACGGT	10423	7909	Asexual	4111
AMRU_Ao_GCGGGTTAGGGTGTGT	8437	6537	Asexual	2967
AMRU_Ao_GCGGGTTGTATGAATG	9925	7066	Asexual	3680
AMRU_Ao_GCGGGTTTCAGCCTAA	6066	4716	Asexual	3834
AMRU_Ao_GCGGGTTTCAGGCCCA	9845	7126	Asexual	4285
AMRU_Ao_GCGGGTTTCCAAACTG	28306	24181	Female	8854
AMRU_Ao_GCTCCTAGTAACGTTC	33651	28452	Female	8477
AMRU_Ao_GCTCCTAGTGTGTGCC	21102	15502	Asexual	4477
AMRU_Ao_GCTCCTATCAATACCG	13608	10806	Asexual	1894
AMRU_Ao_GCTCCTATCACGACTA	18539	12328	Asexual	5701
AMRU_Ao_GCTCCTATCCTGTAGA	3622	2796	Asexual	4629
AMRU_Ao_GCTCTGTCATCAGTCA	19627	14689	Asexual	4246
AMRU_Ao_GCTCTGTGTGCAGGTA	12551	10341	Asexual	2025
AMRU_Ao_GCTGCAGCAGGACCCT	9466	6612	Asexual	5484
AMRU_Ao_GCTGCAGGTAGCTGCC	10484	6726	Asexual	5509
AMRU_Ao_GCTGCAGGTCTACCTC	7111	4634	Asexual	6230
AMRU_Ao_GCTGCAGGTCTCATCC	8742	6813	Asexual	1745
AMRU_Ao_GCTGCAGTCAATACCG	12805	10241	Asexual	3307
AMRU_Ao_GCTGCAGTCCTCAATT	14061	8875	Asexual	6288
AMRU_Ao_GCTGCAGTCCTTAATC	14498	11251	Asexual	2880
AMRU_Ao_GCTGCGAAGCAATATG	4090	3117	Asexual	3776
AMRU_Ao_GCTGCGACACCGGAAA	11571	7946	Asexual	4737
AMRU_Ao_GCTGCGACATGCATGT	19071	13604	Asexual	5162
AMRU_Ao_GCTGCGATCATTGCGA	17031	13697	Asexual	1872
AMRU_Ao_GCTGCGATCCCTGACT	10581	8250	Asexual	2736
AMRU_Ao_GCTGCGATCTTACCGC	11601	6886	Asexual	5919
AMRU_Ao_GCTGCTTGTTCGTCTC	13364	8499	Asexual	6221
AMRU_Ao_GCTGCTTTCATCATTC	28243	23692	Female	8617
AMRU_Ao_GCTGCTTTCCTGCAGG	11314	8707	Asexual	2796
AMRU_Ao_GCTGCTTTCTCTGCTG	12316	9733	Female	7714
AMRU_Ao_GCTGGGTAGAGTACCG	9477	7079	Asexual	3593
AMRU_Ao_GCTGGGTTCCTTTACA	14623	9037	Asexual	6373
AMRU_Ao_GCTTCCAAGATAGGAG	13791	10536	Asexual	3951
AMRU_Ao_GCTTCCAAGGACGAAA	14220	10386	Asexual	4483
AMRU_Ao_GCTTCCACAAAGGTGC	12398	9003	Asexual	4573
AMRU_Ao_GCTTCCACACCATGTA	4044	1975	Asexual	7516
AMRU_Ao_GCTTCCACACCGCTAG	19805	14279	Asexual	3887
AMRU_Ao_GCTTCCAGTTTAGGAA	16684	10259	Asexual	5440
AMRU_Ao_GCTTCCATCCTAGTGA	7338	5211	Asexual	5794
AMRU_Ao_GCTTGAATCGGCCGAT	15151	9849	Asexual	5960
AMRU_Ao_GCTTGAATCGGTCCGA	13275	9828	Asexual	4083
AMRU_Ao_GGAAAGCAGGCTAGCA	8038	6854	Female	8778
AMRU_Ao_GGAAAGCGTGCCTGTG	4226	2943	Asexual	6204
AMRU_Ao_GGAACTTAGACCTTTG	17841	13017	Asexual	4210
AMRU_Ao_GGAACTTAGCAACGGT	34582	28633	Female	8327
AMRU_Ao_GGAACTTAGTGGTAGC	9347	2688	Asexual	7403
AMRU_Ao_GGAACTTGTCACTGGC	14056	10787	Asexual	4058
AMRU_Ao_GGAACTTTCGTTGACA	7887	6050	Asexual	297
AMRU_Ao_GGAATAAAGGGCATGT	14022	10889	Asexual	3322
AMRU_Ao_GGAATAAAGTACGTTC	25071	20815	Female	8837
AMRU_Ao_GGAATAAGTCGCGGTT	10403	8182	Asexual	1497
AMRU_Ao_GGAATAATCTCGCATC	14358	11323	Asexual	4113
AMRU_Ao_GGACAAGCAATTGCTG	12363	9114	Asexual	323
AMRU_Ao_GGACAAGCAGTTAACC	10362	8187	Asexual	1986
AMRU_Ao_GGACAAGCATCACGAT	13753	10871	Asexual	2759
AMRU_Ao_GGACAAGGTCTAGTCA	13710	10732	Asexual	2422
AMRU_Ao_GGACAAGTCATAACCG	15191	10921	Asexual	4890
AMRU_Ao_GGACAGACAGGGTATG	7116	5911	Female	8538
AMRU_Ao_GGACAGATCAGGTTCA	12476	9437	Asexual	4332
AMRU_Ao_GGACAGATCGCGTTTC	11629	9047	Asexual	3138
AMRU_Ao_GGACATTAGCGCCTTG	13301	10497	Asexual	2432
AMRU_Ao_GGACATTGTAAACGCG	18792	12068	Asexual	5439
AMRU_Ao_GGACATTGTACAGCAG	11823	8931	Asexual	3917
AMRU_Ao_GGACGTCAGCTGTTCA	10598	8254	Asexual	3276
AMRU_Ao_GGACGTCCAATGAATG	9386	7288	Asexual	4064
AMRU_Ao_GGAGCAACAGTTCCCT	12942	9736	Asexual	4124
AMRU_Ao_GGAGCAACATCGTCGG	6285	4955	Asexual	3475
AMRU_Ao_GGATGTTAGCTAGTGG	7160	5280	Female	7700
AMRU_Ao_GGATGTTCACTGTCGG	15422	11758	Asexual	3041
AMRU_Ao_GGATTACCAGAGTGTG	12713	8622	Asexual	5207
AMRU_Ao_GGATTACCATGGAATA	4546	2602	NA	NA
AMRU_Ao_GGATTACTCGGATGTT	32233	27382	Female	8772
AMRU_Ao_GGATTACTCTGCGACG	3120	2126	Female	8022
AMRU_Ao_GGCAATTAGACCCACC	5531	3760	Asexual	4970
AMRU_Ao_GGCAATTAGCTTCGCG	16055	12009	Female	7865
AMRU_Ao_GGCAATTCATGAGCGA	10041	7899	Asexual	1474
AMRU_Ao_GGCAATTGTTACGCGC	29115	24436	Female	8790
AMRU_Ao_GGCAATTTCCGGGTGT	11361	8573	Asexual	3667
AMRU_Ao_GGCCGATCACCTATCC	36958	31472	Female	8759
AMRU_Ao_GGCCGATCATATGCTG	16836	12320	Asexual	4832
AMRU_Ao_GGCCGATGTCTTTCAT	16536	11855	Asexual	4647
AMRU_Ao_GGCCGATTCGAGGTAG	4725	3316	Asexual	4430
AMRU_Ao_GGCGACTAGCGATATA	4367	3297	Asexual	3807
AMRU_Ao_GGCGACTAGCTCCCAG	10931	8648	Asexual	3706
AMRU_Ao_GGCGACTCAATGAAAC	7895	5931	Male	9155
AMRU_Ao_GGCGACTCATGCCTTC	12530	8287	Asexual	6624
AMRU_Ao_GGCGACTGTAATCGTC	6712	5128	Asexual	1397
AMRU_Ao_GGCGACTGTATCTGCA	12651	8397	Asexual	5391
AMRU_Ao_GGCGACTGTCCCTACT	8814	5069	Asexual	6356
AMRU_Ao_GGCGACTGTCGCTTTC	5702	4357	Asexual	2420
AMRU_Ao_GGCGACTGTCGTGGCT	18180	15097	Female	8736
AMRU_Ao_GGCGACTTCAAACGGG	11143	8466	Asexual	3762
AMRU_Ao_GGCGACTTCCATGCTC	14612	10585	Asexual	4222
AMRU_Ao_GGCGTGTGTCGCTTCT	17674	12690	Asexual	4386
AMRU_Ao_GGCGTGTGTGGTTTCA	32383	26933	Female	8512
AMRU_Ao_GGCGTGTTCCAGTATG	11769	8662	Asexual	4497
AMRU_Ao_GGCGTGTTCTTATCTG	15312	10996	Asexual	4662
AMRU_Ao_GGCTCGAAGACTGTAA	6817	4968	Asexual	5124
AMRU_Ao_GGCTCGAAGTACATGA	8381	6718	Asexual	1666
AMRU_Ao_GGCTCGAGTCATCGGC	11590	9563	Female	8632
AMRU_Ao_GGCTCGATCCGCGGTA	11180	8661	Asexual	3201
AMRU_Ao_GGCTGGTAGCTCAACT	9263	6866	Asexual	6869
AMRU_Ao_GGCTGGTAGTGACATA	12967	9721	Asexual	3487
AMRU_Ao_GGCTGGTCAATGACCT	29780	25027	Female	8861
AMRU_Ao_GGCTGGTCAGTAAGCG	19247	16092	Female	8211
AMRU_Ao_GGGAATGAGATCTGAA	12117	8621	Asexual	4745
AMRU_Ao_GGGAATGGTATGGTTC	5257	4166	Asexual	4400
AMRU_Ao_GGGAATGTCGCATGAT	15545	11123	Asexual	4276
AMRU_Ao_GGGACCTCAATCCGAT	7558	6502	Female	8856
AMRU_Ao_GGGACCTCAGTGAGTG	14369	8536	Asexual	6223
AMRU_Ao_GGGACCTGTTGACGTT	27291	22892	Female	8853
AMRU_Ao_GGGACCTTCACAATGC	16676	12390	Asexual	4172
AMRU_Ao_GGGACCTTCTCCAACC	18290	13863	Asexual	3752
AMRU_Ao_GGGAGATCAGTGGGAT	4082	3095	Asexual	2838
AMRU_Ao_GGGATGACAGTGGAGT	7783	5920	Asexual	3051
AMRU_Ao_GGGCACTCACTATCTT	19320	14227	Asexual	4264
AMRU_Ao_GGGCACTCAGCCAATT	8574	6122	Asexual	4205
AMRU_Ao_GGGCACTCAGCCTATA	12230	9131	Asexual	3237
AMRU_Ao_GGGCACTCATGCAATC	13620	10391	Asexual	1885
AMRU_Ao_GGGCACTGTCCGAAGA	3613	2583	Asexual	4379
AMRU_Ao_GGGCACTGTTACTGAC	6998	4604	Asexual	5217
AMRU_Ao_GGGCACTGTTCCACAA	13656	11108	Female	7647
AMRU_Ao_GGGCATCAGAGACGAA	13653	8398	Asexual	5908
AMRU_Ao_GGGCATCAGCACAGGT	15173	9325	Asexual	6264
AMRU_Ao_GGGCATCCAAGCCGTC	14935	11394	Asexual	4280
AMRU_Ao_GGGCATCGTACGCTGC	6000	1874	Asexual	7234
AMRU_Ao_GGGCATCGTATCTGCA	26874	22454	Female	8929
AMRU_Ao_GGGCATCTCCGCGGTA	6317	4538	Male	9075
AMRU_Ao_GGGTCTGGTAGCTCCG	14665	11295	Asexual	1651
AMRU_Ao_GGGTCTGGTCTCAACA	15261	10642	Asexual	5184
AMRU_Ao_GGGTCTGTCAGCGATT	36297	30251	Female	8635
AMRU_Ao_GGGTTGCTCCGTCAAA	3977	2877	Asexual	1222
AMRU_Ao_GGTATTGCACCTGGTG	5699	4372	Asexual	3702
AMRU_Ao_GGTGAAGAGTGTCTCA	12675	8349	Asexual	5498
AMRU_Ao_GGTGAAGGTCAGCTAT	10595	8401	Asexual	3292
AMRU_Ao_GGTGAAGGTGCTCTTC	15376	9948	Asexual	5411
AMRU_Ao_GGTGAAGTCTGCTTGC	10613	7920	Asexual	4602
AMRU_Ao_GGTGCGTAGAGAGCTC	10320	7818	Asexual	3937
AMRU_Ao_GGTGCGTCAACACCCG	24584	20118	Female	8137
AMRU_Ao_GGTGCGTTCGAATCCA	10993	8160	Asexual	1064
AMRU_Ao_GGTGTTAAGCGACGTA	20641	14346	Asexual	5220
AMRU_Ao_GGTGTTAAGTGGTCCC	16208	11423	Asexual	4754
AMRU_Ao_GGTGTTATCTCACATT	5213	3538	Asexual	5157
AMRU_Ao_GTAACGTCATATGAGA	14596	11421	Asexual	4152
AMRU_Ao_GTAACGTGTATTAGCC	27406	23291	Female	8874
AMRU_Ao_GTAACGTGTCCTCTTG	5871	4587	Asexual	2110
AMRU_Ao_GTAACGTGTGGTGTAG	13623	9866	Asexual	4524
AMRU_Ao_GTAACTGCAACAACCT	15233	11920	Asexual	2147
AMRU_Ao_GTAACTGTCTCTAAGG	19745	15418	Asexual	3673
AMRU_Ao_GTAACTGTCTTACCTA	10220	8053	Asexual	2987
AMRU_Ao_GTACGTAAGTGAACGC	13074	9814	Asexual	3836
AMRU_Ao_GTACGTACATCAGTCA	6399	4820	Asexual	521
AMRU_Ao_GTACGTAGTCATACTG	11413	7911	Asexual	5125
AMRU_Ao_GTACTCCGTAAATACG	9611	7208	Male	9116
AMRU_Ao_GTACTCCTCAGGCCCA	8248	6280	Asexual	3969
AMRU_Ao_GTACTTTCACAACGTT	5651	4689	Female	8319
AMRU_Ao_GTACTTTGTACCGTAT	11141	7061	Asexual	5614
AMRU_Ao_GTACTTTGTATATGGA	12434	9795	Asexual	3922
AMRU_Ao_GTACTTTGTGTGCCTG	18860	13698	Asexual	4452
AMRU_Ao_GTACTTTTCATCTGCC	18224	13988	Female	7872
AMRU_Ao_GTACTTTTCGGCGCTA	30297	25030	Female	8657
AMRU_Ao_GTAGGCCAGTCGTACT	11781	7532	Asexual	5246
AMRU_Ao_GTAGGCCCACTAAGTC	15269	10907	Asexual	4953
AMRU_Ao_GTAGGCCCAGCCTATA	20087	15392	Asexual	3978
AMRU_Ao_GTAGGCCCAGCTGGCT	12657	9238	Asexual	4334
AMRU_Ao_GTAGGCCGTTCCATGA	19144	14275	Asexual	4260
AMRU_Ao_GTAGGCCTCACTCCTG	7762	6316	Asexual	1535
AMRU_Ao_GTAGGCCTCCAGGGCT	15462	10707	Asexual	5275
AMRU_Ao_GTAGTCAAGGCCCTCA	16837	14141	Female	8223
AMRU_Ao_GTAGTCATCAACCAAC	4539	3566	Asexual	132
AMRU_Ao_GTAGTCATCCTTTCTC	37984	32067	Female	8689
AMRU_Ao_GTATCTTAGCCAGTAG	13117	10219	Asexual	4035
AMRU_Ao_GTATCTTAGGGTATCG	10071	7288	Asexual	4238
AMRU_Ao_GTATCTTTCAGTCAGT	10348	8068	Asexual	3253
AMRU_Ao_GTATCTTTCGCATGAT	12055	9319	Asexual	1230
AMRU_Ao_GTCAAGTAGGATCGCA	9001	6655	Asexual	4464
AMRU_Ao_GTCAAGTCACGAGAGT	12883	10097	Asexual	2286
AMRU_Ao_GTCAAGTCAGATCGGA	6950	5341	Asexual	3916
AMRU_Ao_GTCACAAAGCTCCTTC	14251	10682	Asexual	3797
AMRU_Ao_GTCACAACAGGTTTCA	7605	5343	Asexual	4661
AMRU_Ao_GTCACAATCTCCCTGA	5727	4390	Asexual	65
AMRU_Ao_GTCACGGCAAAGTCAA	15564	10834	Asexual	5274
AMRU_Ao_GTCATTTAGCGTAGTG	11502	8413	Asexual	3111
AMRU_Ao_GTCATTTAGGCCATAG	13613	8926	Asexual	5276
AMRU_Ao_GTCATTTCAGTCGTGC	5615	3818	Asexual	5533
AMRU_Ao_GTCATTTCATCCGGGT	19579	13905	Asexual	4423
AMRU_Ao_GTCATTTTCTTATCTG	11163	8358	Asexual	4270
AMRU_Ao_GTCCTCAAGACATAAC	6295	4553	Asexual	79
AMRU_Ao_GTCCTCAAGCTAACTC	11428	8958	Asexual	1798
AMRU_Ao_GTCCTCACATGTTCCC	4155	2517	Asexual	5126
AMRU_Ao_GTCCTCATCGTGGTCG	14908	11056	Asexual	4265
AMRU_Ao_GTCCTCATCTTCATGT	15812	12856	Asexual	3229
AMRU_Ao_GTCGGGTGTACTTGAC	6268	4172	Asexual	4882
AMRU_Ao_GTCGGGTGTTCGGCAC	3698	2471	Asexual	5065
AMRU_Ao_GTCGTAACACATGACT	9246	6925	Asexual	4195
AMRU_Ao_GTCGTAACAGAGTGTG	10141	7427	Asexual	4203
AMRU_Ao_GTCTCGTAGCGATGAC	3867	3229	Female	8660
AMRU_Ao_GTCTCGTCATTGGCGC	12343	9415	Asexual	3199
AMRU_Ao_GTCTCGTGTGGGTATG	15983	11522	Asexual	4318
AMRU_Ao_GTCTCGTGTTTGTGTG	15187	12027	Asexual	3615
AMRU_Ao_GTCTTCGCAATGACCT	8661	6308	Asexual	4510
AMRU_Ao_GTGAAGGAGCAATCTC	4744	3554	Asexual	4002
AMRU_Ao_GTGAAGGAGCTAGTCT	7423	5421	Asexual	6866
AMRU_Ao_GTGAAGGAGGCATGGT	12034	9345	Asexual	1483
AMRU_Ao_GTGAAGGCACAGATTC	17254	12469	Asexual	4154
AMRU_Ao_GTGCAGCAGTGGGCTA	10687	6653	Asexual	6035
AMRU_Ao_GTGCAGCGTGCTGTAT	7275	5393	Asexual	3549
AMRU_Ao_GTGCATAAGAGCTTCT	26827	19119	Asexual	4781
AMRU_Ao_GTGCATACAAGCCATT	11011	8283	Asexual	3694
AMRU_Ao_GTGCATACAATGAATG	9829	6614	Asexual	5572
AMRU_Ao_GTGCATACAGCTGCTG	29958	25060	Female	8844
AMRU_Ao_GTGCATATCAATAAGG	14362	11689	Asexual	2698
AMRU_Ao_GTGCGGTAGCGTCTAT	13692	10638	Asexual	3033
AMRU_Ao_GTGCGGTCAGATTGCT	9677	7120	Asexual	4491
AMRU_Ao_GTGCGGTGTAAGAGGA	17217	12745	Asexual	4217
AMRU_Ao_GTGCGGTTCAGCTGGC	22034	14565	Asexual	5588
AMRU_Ao_GTGCTTCCACCGATAT	17503	13644	Asexual	2203
AMRU_Ao_GTGCTTCCAGCTATTG	12256	9595	Asexual	2395
AMRU_Ao_GTGCTTCCATCCAACA	12736	9256	Asexual	3930
AMRU_Ao_GTGCTTCCATTAGCCA	3776	2511	Asexual	7317
AMRU_Ao_GTGCTTCGTAATCACC	12255	9189	Asexual	4475
AMRU_Ao_GTGGGTCCACATAACC	34932	29329	Female	8550
AMRU_Ao_GTGGGTCCACATGTGT	8694	4942	Asexual	7074
AMRU_Ao_GTGGGTCCACGACTCG	10436	7890	Asexual	4212
AMRU_Ao_GTGGGTCCATTTCAGG	3762	2483	Asexual	4885
AMRU_Ao_GTGGGTCGTAAGGGCT	28670	23798	Female	8801
AMRU_Ao_GTGGGTCTCTGCTGCT	18767	14162	Asexual	4015
AMRU_Ao_GTGTGCGGTCTCTTTA	25454	21163	Female	8548
AMRU_Ao_GTGTGCGGTGTTTGGT	5130	3647	Asexual	4234
AMRU_Ao_GTGTTAGAGCGGATCA	12602	9025	Asexual	4306
AMRU_Ao_GTGTTAGCACCAACCG	25189	16082	Asexual	5669
AMRU_Ao_GTTAAGCAGGACTGGT	13427	10146	Asexual	1291
AMRU_Ao_GTTAAGCGTGACTACT	16061	10230	Asexual	5679
AMRU_Ao_GTTAAGCTCTGATACG	4251	3400	Asexual	4406
AMRU_Ao_GTTACAGAGCTAGCCC	11553	8644	Asexual	2419
AMRU_Ao_GTTACAGAGGGTTCCC	11713	8584	Asexual	4651
AMRU_Ao_GTTACAGCAGCTGCAC	17555	11936	Asexual	5419
AMRU_Ao_GTTACAGGTGCCTGCA	15232	11943	Female	7857
AMRU_Ao_GTTACAGTCCACGTTC	37027	30266	Female	8272
AMRU_Ao_GTTACAGTCTTAGAGC	16372	12527	Asexual	4008
AMRU_Ao_GTTCATTAGACTAGGC	13815	11012	Asexual	3624
AMRU_Ao_GTTCATTAGTCGATAA	8032	6604	Asexual	1417
AMRU_Ao_GTTCATTCAAACTGTC	11456	9064	Asexual	1579
AMRU_Ao_GTTCATTGTCTCTTAT	7812	5917	Asexual	1351
AMRU_Ao_GTTCATTTCGAATGCT	12040	9380	Asexual	4587
AMRU_Ao_GTTCATTTCTGCAAGT	7947	6140	Asexual	3900
AMRU_Ao_GTTCGGGAGCTATGCT	15843	12152	Asexual	3701
AMRU_Ao_GTTCGGGGTTGGGACA	15683	11023	Asexual	4733
AMRU_Ao_GTTCTCGAGGGTTCCC	11427	8612	Asexual	2315
AMRU_Ao_GTTCTCGCACCATCCT	18353	13882	Asexual	3534
AMRU_Ao_GTTCTCGGTCGACTAT	8919	7143	Asexual	1652
AMRU_Ao_GTTCTCGTCATCGCTC	17443	13075	Asexual	4236
AMRU_Ao_GTTTCTAAGCCCGAAA	3797	2847	Asexual	4688
AMRU_Ao_GTTTCTAAGTATCGAA	16508	13350	Asexual	1922
AMRU_Ao_GTTTCTAGTCCGAAGA	5905	4593	Asexual	3301
AMRU_Ao_GTTTCTATCGGCGGTT	3629	3072	Female	8117
AMRU_Ao_TAAACCGCAGCTGTGC	34878	29498	Female	8886
AMRU_Ao_TAAACCGCATTGAGCT	16820	11501	Asexual	5202
AMRU_Ao_TAAACCGGTACAGTGG	16776	13286	Asexual	2694
AMRU_Ao_TAAACCGGTTCACGGC	6855	5520	Asexual	2041
AMRU_Ao_TAAACCGTCGATGAGG	27317	22519	Female	8574
AMRU_Ao_TAAACCGTCGTACCGG	9662	6698	Asexual	4961
AMRU_Ao_TAAACCGTCTAAGCCA	8599	3745	Asexual	7295
AMRU_Ao_TAAGAGACAACAACCT	14627	9773	Asexual	4968
AMRU_Ao_TAAGAGACAATAACGA	35835	29481	Female	8098
AMRU_Ao_TAAGAGACATTTGCCC	4351	2829	Asexual	5447
AMRU_Ao_TAAGAGATCCTAGGGC	9438	7459	Asexual	1320
AMRU_Ao_TAAGCGTCAGCCAGAA	13526	9904	Asexual	4209
AMRU_Ao_TAAGCGTGTCGGCTCA	3408	2500	Female	7869
AMRU_Ao_TAAGTGCAGGTTACCT	17263	11133	Asexual	5370
AMRU_Ao_TAAGTGCAGTGAACGC	17438	14175	Asexual	3530
AMRU_Ao_TAAGTGCTCAGAGCTT	4090	3084	Asexual	726
AMRU_Ao_TAAGTGCTCCCTGACT	5073	3984	Asexual	1576
AMRU_Ao_TACACGACACCAGCAC	4997	3796	Asexual	1622
AMRU_Ao_TACAGTGAGAAACGAG	12415	8273	Asexual	5332
AMRU_Ao_TACAGTGTCCTCATTA	13410	11239	Asexual	2294
AMRU_Ao_TACAGTGTCCTGCAGG	10523	8269	Asexual	1486
AMRU_Ao_TACCTATAGAGTTGGC	23182	19441	Female	8604
AMRU_Ao_TACCTTAAGCTCCTCT	5528	1656	Asexual	7481
AMRU_Ao_TACCTTACAAATTGCC	7150	5236	Asexual	6642
AMRU_Ao_TACCTTATCAGCACAT	6191	4673	Asexual	3639
AMRU_Ao_TACCTTATCTGCCAGG	38665	32072	Female	8304
AMRU_Ao_TACGGATAGTGCCAGA	20132	16117	Female	7992
AMRU_Ao_TACGGATCAGTTCCCT	17309	12141	Asexual	5073
AMRU_Ao_TACGGATGTTTGACAC	19297	16051	Female	8685
AMRU_Ao_TACGGATTCACCGTAA	3843	2980	Asexual	4812
AMRU_Ao_TACGGGCAGCGATAGC	19831	14466	Asexual	4119
AMRU_Ao_TACGGGCCAAGGACAC	11287	8703	Asexual	2513
AMRU_Ao_TACGGGCCACTGAAGG	15999	10371	Asexual	6410
AMRU_Ao_TACGGGCGTCGTCTTC	25505	21386	Female	8952
AMRU_Ao_TACGGGCGTGCAGACA	12740	9867	Asexual	3581
AMRU_Ao_TACGGGCGTTGTACAC	18731	14463	Asexual	2771
AMRU_Ao_TACGGTAAGAGGGCTT	16935	13513	Asexual	3068
AMRU_Ao_TACGGTAAGGTGCTAG	8306	6410	Asexual	2222
AMRU_Ao_TACGGTAAGTGTCCAT	16360	10571	Asexual	5676
AMRU_Ao_TACGGTATCATGCTCC	6536	4918	Asexual	6673
AMRU_Ao_TACTCATAGTGGAGAA	4190	3184	Asexual	5213
AMRU_Ao_TACTCATGTGCAGGTA	33509	28084	Female	8372
AMRU_Ao_TACTCGCGTCCAGTGC	30994	26230	Female	8860
AMRU_Ao_TACTCGCTCGATAGAA	7241	2303	Asexual	7297
AMRU_Ao_TACTCGCTCGGAAACG	13348	9874	Asexual	4841
AMRU_Ao_TACTTACGTCATCCCT	13521	10254	Asexual	267
AMRU_Ao_TACTTGTAGGCCGAAT	15448	10264	Asexual	5277
AMRU_Ao_TACTTGTAGTGGTAGC	10488	8540	Asexual	2960
AMRU_Ao_TACTTGTGTAAAGGAG	10498	8752	Asexual	3098
AMRU_Ao_TACTTGTGTCCGTTAA	15496	11926	Asexual	3740
AMRU_Ao_TACTTGTTCACCTTAT	18495	13812	Asexual	4237
AMRU_Ao_TAGACCACAATTCCTT	12030	9183	Asexual	1460
AMRU_Ao_TAGAGCTGTCGAAAGC	10803	6262	Asexual	7131
AMRU_Ao_TAGAGCTGTCTCTTTA	14933	11638	Asexual	2666
AMRU_Ao_TAGCCGGAGCGTTGCC	9235	7346	Female	7685
AMRU_Ao_TAGCCGGAGTACACCT	7371	5470	Asexual	3028
AMRU_Ao_TAGCCGGGTAGCTTGT	12705	8797	Asexual	4764
AMRU_Ao_TAGCCGGGTCATCCCT	13806	8374	Asexual	5697
AMRU_Ao_TAGCCGGGTTTGTGTG	15253	11546	Asexual	3935
AMRU_Ao_TAGCCGGTCATAGCAC	10502	8259	Asexual	3527
AMRU_Ao_TAGCCGGTCCTTGCCA	23904	16353	Asexual	5101
AMRU_Ao_TAGGCATAGCGGATCA	4871	3346	Asexual	4786
AMRU_Ao_TAGGCATGTAGCTTGT	16828	11904	Asexual	4646
AMRU_Ao_TAGTGGTAGGGCTTCC	17441	13799	Asexual	3411
AMRU_Ao_TAGTGGTGTTAGGGTG	8638	6506	Asexual	2744
AMRU_Ao_TAGTGGTTCGAATCCA	5473	4220	Asexual	3142
AMRU_Ao_TAGTTGGGTTGTCGCG	9844	7509	Asexual	3668
AMRU_Ao_TAGTTGGTCTCGCTTG	10858	7923	Asexual	4395
AMRU_Ao_TATCAGGAGTCGTACT	13997	10845	Asexual	3321
AMRU_Ao_TATCAGGCAGTCGATT	11862	9478	Asexual	2192
AMRU_Ao_TATCAGGGTATGGTTC	25182	21363	Female	8889
AMRU_Ao_TATCAGGGTCTCCCTA	12347	9266	Asexual	3280
AMRU_Ao_TATCTCAAGGTGGGTT	11552	7678	Asexual	5645
AMRU_Ao_TATCTCACAAAGGAAG	14315	11013	Asexual	3921
AMRU_Ao_TATCTCACACAGCGTC	12179	8365	Asexual	5093
AMRU_Ao_TATCTCACAGTGGGAT	12175	9534	Female	7894
AMRU_Ao_TATCTCAGTCGCGGTT	10845	8608	Asexual	2472
AMRU_Ao_TATGCCCAGTGTACGG	31011	26025	Female	8751
AMRU_Ao_TATGCCCCACTTACGA	13175	8187	Asexual	6433
AMRU_Ao_TATGCCCTCAACACGT	6973	5221	Asexual	36
AMRU_Ao_TATTACCCAAGTCTAC	16946	11927	Asexual	4845
AMRU_Ao_TCAACGAAGTCCTCCT	13447	10634	Asexual	3682
AMRU_Ao_TCAACGATCCCGACTT	21955	15735	Asexual	4738
AMRU_Ao_TCAACGATCTTTAGTC	14368	11282	Asexual	2456
AMRU_Ao_TCAATCTCACCGTTGG	14263	11110	Asexual	3396
AMRU_Ao_TCAATCTCAGACAGGT	13711	10437	Asexual	4311
AMRU_Ao_TCAATCTCATCCCATC	10413	8246	Asexual	2557
AMRU_Ao_TCAATCTTCTATCGCC	8994	5679	Asexual	5492
AMRU_Ao_TCAATCTTCTGGTTCC	11690	8653	Asexual	3489
AMRU_Ao_TCACAAGCATCAGTCA	13025	10014	Asexual	3676
AMRU_Ao_TCACAAGGTAGCTTGT	23229	18666	Female	8135
AMRU_Ao_TCACAAGGTTGAGTTC	10591	7755	Asexual	4244
AMRU_Ao_TCACAAGTCCCTTGTG	13596	8888	Asexual	5840
AMRU_Ao_TCACAAGTCTGATACG	16398	11258	Asexual	4929
AMRU_Ao_TCACGAAAGTGTGAAT	12580	9871	Asexual	2402
AMRU_Ao_TCACGAACATTCTTAC	16502	11002	Asexual	5521
AMRU_Ao_TCACGAATCTTGCAAG	23985	19783	Female	8094
AMRU_Ao_TCAGATGGTAGAGCTG	14749	10786	Asexual	4292
AMRU_Ao_TCAGATGTCTTCGAGA	3324	2193	Asexual	5219
AMRU_Ao_TCAGCAAAGACGACGT	7816	6026	Female	7618
AMRU_Ao_TCAGCAACATACTCTT	3995	3024	Asexual	3985
AMRU_Ao_TCAGCAAGTACTTAGC	14847	9035	Asexual	5631
AMRU_Ao_TCAGCTCAGACTACAA	7446	5487	Asexual	4692
AMRU_Ao_TCAGCTCCACGGCGTT	15465	11033	Asexual	3295
AMRU_Ao_TCAGCTCGTCATCGGC	15813	4346	Asexual	7423
AMRU_Ao_TCAGCTCGTGGTTTCA	6712	5303	Asexual	2755
AMRU_Ao_TCAGGATTCTGATACG	9582	7582	Asexual	1178
AMRU_Ao_TCAGGATTCTTCTGGC	10960	8657	Asexual	3392
AMRU_Ao_TCATTACGTTAGAACA	16500	11213	Asexual	5232
AMRU_Ao_TCATTACTCAACGAAA	18417	13665	Asexual	4109
AMRU_Ao_TCATTTGAGCACCGTC	6506	4959	Asexual	3888
AMRU_Ao_TCATTTGAGCCGGTAA	7280	5654	Asexual	4740
AMRU_Ao_TCATTTGAGGATGTAT	11895	8488	Asexual	6670
AMRU_Ao_TCCACACCAAATCCGT	26196	21841	Female	8757
AMRU_Ao_TCCACACCACGTCAGC	12863	9712	Asexual	3893
AMRU_Ao_TCCACACTCTGCCAGG	9144	7092	Asexual	2824
AMRU_Ao_TCCCGATCAAGTAGTA	9036	6762	Asexual	4463
AMRU_Ao_TCCCGATCATAAGACA	12691	9829	Asexual	1507
AMRU_Ao_TCCCGATGTACGAAAT	42037	35435	Female	8280
AMRU_Ao_TCCCGATGTCGACTGC	12238	9773	Asexual	1590
AMRU_Ao_TCGCGAGGTCTAAACC	16661	11871	Asexual	4840
AMRU_Ao_TCGCGTTAGCTAGTGG	16772	12398	Asexual	3490
AMRU_Ao_TCGCGTTCATCATCCC	8695	6251	Asexual	4134
AMRU_Ao_TCGCGTTTCAAGGCTT	24274	19960	Female	8093
AMRU_Ao_TCGGGACAGTCCCACG	28714	23799	Female	8642
AMRU_Ao_TCGGGACAGTTATCGC	17157	10877	Asexual	5403
AMRU_Ao_TCGGGACCAGTATAAG	13121	8739	Asexual	5553
AMRU_Ao_TCGGGACGTCATATGC	13482	10276	Asexual	3892
AMRU_Ao_TCGGGACTCATCACCC	13010	10459	Asexual	2301
AMRU_Ao_TCGGGACTCTTAGAGC	14267	11511	Asexual	2707
AMRU_Ao_TCGGTAACACAGACTT	12964	9589	Asexual	2842
AMRU_Ao_TCGGTAAGTAAACGCG	4424	3602	Asexual	3059
AMRU_Ao_TCGGTAAGTCACACGC	3960	2795	Asexual	5415
AMRU_Ao_TCGGTAAGTTAAGGGC	11420	8647	Asexual	3733
AMRU_Ao_TCGTACCCAGCGTCCA	14100	9376	Asexual	5127
AMRU_Ao_TCGTACCCATATACCG	11262	8973	Asexual	1645
AMRU_Ao_TCGTACCGTTCAGTAC	14124	11181	Asexual	1694
AMRU_Ao_TCGTACCTCAAACAAG	24522	20541	Female	8158
AMRU_Ao_TCGTAGAGTCCAGTAT	11671	9053	Asexual	2079
AMRU_Ao_TCGTAGATCCGTCAAA	7842	6021	Asexual	1606
AMRU_Ao_TCGTAGATCGCTTGTC	9384	7397	Female	7637
AMRU_Ao_TCGTAGATCTACTATC	10485	6775	Asexual	6476
AMRU_Ao_TCGTAGATCTTGTCAT	20958	16047	Asexual	3873
AMRU_Ao_TCTATTGAGGAACTGC	15919	11193	Asexual	5624
AMRU_Ao_TCTATTGAGTGAATTG	14670	11131	Asexual	4519
AMRU_Ao_TCTATTGCAAATACAG	11897	8964	Asexual	2143
AMRU_Ao_TCTATTGCAATCGGTT	7016	5607	Asexual	2347
AMRU_Ao_TCTATTGCATGGTCAT	12071	9409	Asexual	2465
AMRU_Ao_TCTATTGGTCCGTCAG	12357	9617	Asexual	2555
AMRU_Ao_TCTATTGGTCTGCAAT	10883	8269	Asexual	3847
AMRU_Ao_TCTATTGGTTCACCTC	4864	3769	Asexual	2043
AMRU_Ao_TCTATTGTCTCCAGGG	7704	5596	Asexual	4268
AMRU_Ao_TCTATTGTCTCGTTTA	11053	8520	Male	9145
AMRU_Ao_TCTCATACAGTCGTGC	7215	5832	Asexual	1721
AMRU_Ao_TCTCATAGTTTGGGCC	13799	10156	Asexual	4532
AMRU_Ao_TCTCATATCTAACGGT	12265	9445	Asexual	2258
AMRU_Ao_TCTCTAAAGTCATGCT	9179	6344	Asexual	5133
AMRU_Ao_TCTGAGAGTGACGCCT	12938	10200	Female	8161
AMRU_Ao_TCTGAGATCATAAAGG	9639	7031	Asexual	4714
AMRU_Ao_TCTGGAAAGCGTAGTG	5937	4269	Asexual	6908
AMRU_Ao_TCTGGAAGTCTGGTCG	11371	8824	Asexual	2323
AMRU_Ao_TCTTCGGAGCGATATA	11851	9245	Female	7921
AMRU_Ao_TCTTCGGAGCTATGCT	7739	4887	NA	NA
AMRU_Ao_TCTTCGGCATGAGCGA	11717	8638	Asexual	4899
AMRU_Ao_TCTTCGGTCAACCAAC	11316	7445	Asexual	6426
AMRU_Ao_TCTTTCCAGGGTGTGT	15229	10453	Asexual	5105
AMRU_Ao_TCTTTCCCACCCATTC	15889	11767	Asexual	4211
AMRU_Ao_TGAAAGACACGGTGTC	15014	11501	Asexual	2870
AMRU_Ao_TGAAAGACAGCCTGTG	26291	21997	Female	8309
AMRU_Ao_TGAAAGACATCCCACT	20175	12661	Asexual	6432
AMRU_Ao_TGAAAGATCCTCGCAT	5374	3762	Asexual	4165
AMRU_Ao_TGACAACAGTTCGCGC	12945	8549	Asexual	4951
AMRU_Ao_TGACAACTCATTCACT	17788	11766	Asexual	5704
AMRU_Ao_TGACAACTCCCTAACC	32298	27089	Female	8688
AMRU_Ao_TGACGGCAGACAATAC	10019	7268	Asexual	4546
AMRU_Ao_TGACGGCAGCTAAACA	12022	8639	Asexual	4621
AMRU_Ao_TGACGGCAGTCGATAA	12162	9520	Asexual	2812
AMRU_Ao_TGACGGCGTGGGTATG	14334	11615	Female	8081
AMRU_Ao_TGACTAGTCGCGCCAA	10491	8068	Asexual	2359
AMRU_Ao_TGACTTTTCGTAGGTT	16500	12550	Asexual	3811
AMRU_Ao_TGAGAGGCATCCCATC	11964	9304	Asexual	3331
AMRU_Ao_TGAGAGGGTGACAAAT	10877	8248	Asexual	3869
AMRU_Ao_TGAGCATAGGAGTTTA	15068	10227	Asexual	5322
AMRU_Ao_TGAGCATCACCCATTC	9582	7635	Asexual	2938
AMRU_Ao_TGAGCATCAGCGTCCA	14039	8814	Asexual	6198
AMRU_Ao_TGAGCATGTAGCTCCG	3511	1859	NA	NA
AMRU_Ao_TGAGCATGTTGCGTTA	10831	8056	Asexual	4045
AMRU_Ao_TGAGCATTCGTTGCCT	13570	8293	Asexual	6416
AMRU_Ao_TGAGCCGCAATAGCGG	3122	2461	Asexual	3553
AMRU_Ao_TGAGCCGGTCGCTTTC	6182	4595	Asexual	301
AMRU_Ao_TGAGCCGGTGAGTATA	30371	25454	Female	8883
AMRU_Ao_TGAGGGATCACATACG	8326	6198	Asexual	3812
AMRU_Ao_TGAGGGATCTTGGGTA	15080	10626	Asexual	5167
AMRU_Ao_TGATTTCTCACAAACC	26680	22557	Female	8898
AMRU_Ao_TGATTTCTCTCCAACC	4611	3266	Asexual	4889
AMRU_Ao_TGATTTCTCTGCAAGT	14739	10988	Asexual	3852
AMRU_Ao_TGCACCTAGACGACGT	5309	3942	Asexual	115
AMRU_Ao_TGCACCTAGCTTCGCG	9836	7158	Asexual	3833
AMRU_Ao_TGCACCTAGGCTCTTA	19648	15413	Female	8014
AMRU_Ao_TGCACCTGTGCAGACA	13138	8335	Asexual	5602
AMRU_Ao_TGCACCTTCTTCTGGC	10475	8744	Female	7953
AMRU_Ao_TGCCAAAAGCGATTCT	16895	13033	Asexual	4116
AMRU_Ao_TGCCCATAGATCGATA	14802	10086	Asexual	5314
AMRU_Ao_TGCCCATAGCCGATTT	8000	5926	Asexual	109
AMRU_Ao_TGCCCATCAGACGCCT	21006	16158	Asexual	3577
AMRU_Ao_TGCCCATGTAGGAGTC	9549	7588	Asexual	2596
AMRU_Ao_TGCCCATGTCTAACGT	17830	13260	Asexual	4391
AMRU_Ao_TGCCCATGTTCGCTAA	15200	10217	Asexual	5540
AMRU_Ao_TGCCCTAAGGATGGAA	4592	3522	Asexual	341
AMRU_Ao_TGCCCTACAAGCGCTC	19095	16081	Female	8437
AMRU_Ao_TGCCCTACACTCTGTC	36706	30862	Female	8612
AMRU_Ao_TGCCCTACATGGTTGT	3086	2664	Female	8942
AMRU_Ao_TGCCCTAGTTAAGATG	8293	6002	Asexual	331
AMRU_Ao_TGCGCAGAGGCGACAT	38191	32047	Female	8213
AMRU_Ao_TGCGCAGCAAGTCTAC	8548	6997	Asexual	1562
AMRU_Ao_TGCGCAGCATGAAGTA	5346	4228	Asexual	2348
AMRU_Ao_TGCGCAGGTAATAGCA	18194	12942	Asexual	5146
AMRU_Ao_TGCGCAGTCAGGATCT	16255	12834	Female	7875
AMRU_Ao_TGCGCAGTCCAGATCA	10267	7633	Asexual	4788
AMRU_Ao_TGCGCAGTCGGCGCTA	19353	13606	Asexual	4742
AMRU_Ao_TGCGCAGTCTCGCATC	6271	4612	Asexual	1390
AMRU_Ao_TGCGGGTAGCGCCTCA	20755	13566	Asexual	5516
AMRU_Ao_TGCGTGGAGAAGGACA	27180	22280	Female	8681
AMRU_Ao_TGCGTGGAGCTAACAA	5897	4379	Asexual	352
AMRU_Ao_TGCGTGGAGTATTGGA	14637	10834	Asexual	2683
AMRU_Ao_TGCGTGGCACGTTGGC	10397	8072	Asexual	2770
AMRU_Ao_TGCGTGGTCATGCTCC	21376	13657	Asexual	5988
AMRU_Ao_TGCTACCAGTCCAGGA	9037	5683	Asexual	6038
AMRU_Ao_TGCTACCCAATAACGA	35324	29860	Female	8863
AMRU_Ao_TGCTACCCACTCAGGC	33429	27841	Female	8340
AMRU_Ao_TGCTACCCAGATCGGA	7723	5738	Male	9120
AMRU_Ao_TGCTACCGTTCACGGC	4732	3430	Asexual	4168
AMRU_Ao_TGCTACCTCACAAACC	10028	6118	Asexual	6311
AMRU_Ao_TGCTACCTCTGGTTCC	4588	3519	Asexual	3472
AMRU_Ao_TGCTGCTGTCCCTACT	14688	11358	Asexual	1778
AMRU_Ao_TGCTGCTGTCTGCAAT	7235	5348	Asexual	3933
AMRU_Ao_TGCTGCTGTCTGCCAG	20568	13647	Asexual	5316
AMRU_Ao_TGCTGCTTCCGCAAGC	12274	7988	Asexual	5198
AMRU_Ao_TGGACGCAGTGAAGAG	26347	22081	Female	8787
AMRU_Ao_TGGACGCTCAGTGCAT	29482	24729	Female	8626
AMRU_Ao_TGGCCAGAGAGCCCAA	11304	8679	Asexual	2855
AMRU_Ao_TGGCCAGAGGGCTTGA	18035	12713	Asexual	4785
AMRU_Ao_TGGCCAGGTGCTTCTC	13075	10661	Female	7946
AMRU_Ao_TGGCCAGGTTAAGTAG	13434	10266	Asexual	4085
AMRU_Ao_TGGCGCAGTTTGCATG	14095	9352	Asexual	5026
AMRU_Ao_TGGCGCATCTGTTGAG	5827	4756	Female	8220
AMRU_Ao_TGGCTGGAGAACTGTA	14849	8951	Asexual	5907
AMRU_Ao_TGGCTGGAGATAGGAG	12439	9799	Asexual	985
AMRU_Ao_TGGCTGGAGGATATAC	4481	3445	Asexual	319
AMRU_Ao_TGGCTGGGTAAACACA	20825	16293	Asexual	3188
AMRU_Ao_TGGCTGGTCCTATTCA	6809	5244	Asexual	3335
AMRU_Ao_TGGCTGGTCTACTCAT	14546	9901	Asexual	6632
AMRU_Ao_TGGGAAGAGGCTATCT	15385	11429	Asexual	4273
AMRU_Ao_TGGGAAGTCAGGTAAA	14923	10075	Asexual	5261
AMRU_Ao_TGGGAAGTCATAACCG	10964	8506	Asexual	3018
AMRU_Ao_TGGGAAGTCATTATCC	14427	11119	Asexual	2206
AMRU_Ao_TGGGAAGTCTGCTGCT	32874	27417	Female	8069
AMRU_Ao_TGGGCGTCAGCTGTAT	11293	8730	Asexual	2168
AMRU_Ao_TGGGCGTCATTCCTGC	10432	6774	Asexual	5239
AMRU_Ao_TGGGCGTTCCGCATAA	16471	12371	Asexual	3962
AMRU_Ao_TGGTTAGAGGCTCTTA	31121	26061	Female	8939
AMRU_Ao_TGGTTAGAGTATCTCG	8941	6174	Asexual	5228
AMRU_Ao_TGGTTAGAGTCAATAG	4696	3413	Asexual	4141
AMRU_Ao_TGGTTAGCAAGTACCT	13038	7855	Asexual	6318
AMRU_Ao_TGGTTAGTCAGGTTCA	9338	7463	Asexual	2722
AMRU_Ao_TGGTTAGTCCGTCATC	14648	11367	Asexual	3069
AMRU_Ao_TGGTTAGTCGGTGTTA	6619	5131	Asexual	97
AMRU_Ao_TGGTTCCCACATCTTT	4355	3094	Asexual	4298
AMRU_Ao_TGTATTCGTCAAAGAT	10929	8869	Asexual	1943
AMRU_Ao_TGTATTCGTCCGTGAC	16617	11207	Asexual	5802
AMRU_Ao_TGTATTCGTTCAGACT	35283	29498	Female	8700
AMRU_Ao_TGTATTCTCCGTTGTC	10345	7953	Asexual	4087
AMRU_Ao_TGTATTCTCCTGTACC	6617	4919	Asexual	4527
AMRU_Ao_TGTCCCAAGACAAGCC	11977	9045	Asexual	3620
AMRU_Ao_TGTCCCAAGGTGATTA	15054	11540	Female	7750
AMRU_Ao_TGTCCCACAAGCCGTC	25401	19155	Asexual	3813
AMRU_Ao_TGTCCCATCCGTCAAA	11070	8394	Asexual	3932
AMRU_Ao_TGTGGTACATGCATGT	4945	3803	Asexual	4131
AMRU_Ao_TGTGGTAGTCTAGAGG	16003	12073	Asexual	4405
AMRU_Ao_TGTGTTTAGAGACTTA	16493	12082	Asexual	4558
AMRU_Ao_TGTGTTTCAGTCACTA	14501	11092	Asexual	2535
AMRU_Ao_TGTGTTTCAGTCCTTC	12563	9400	Asexual	2515
AMRU_Ao_TGTGTTTCAGTCGTGC	14362	9219	Asexual	5581
AMRU_Ao_TGTGTTTCAGTTTACG	13965	11250	Asexual	3725
AMRU_Ao_TGTGTTTGTGGCCCTA	16196	12865	Asexual	3181
AMRU_Ao_TGTGTTTGTGTTTGGT	12938	8150	Asexual	6178
AMRU_Ao_TGTGTTTTCACTTACT	12448	9677	Female	7874
AMRU_Ao_TGTGTTTTCAGATAAG	9321	7245	Female	7717
AMRU_Ao_TGTGTTTTCATCGATG	27627	23141	Female	8893
AMRU_Ao_TGTTCCGCAGCGATCC	19804	13575	Asexual	5085
AMRU_Ao_TGTTCCGTCATTATCC	14055	10521	Asexual	3908
AMRU_Ao_TGTTCCGTCCGGGTGT	35688	30232	Female	8588
AMRU_Ao_TGTTCCGTCTTAGCCC	3710	3046	Asexual	3393
AMRU_Ao_TTAACTCAGAGGGCTT	15410	11166	Asexual	4050
AMRU_Ao_TTAACTCAGTCCCACG	14668	10358	Asexual	4606
AMRU_Ao_TTAACTCCAGTGGAGT	20016	16851	Female	8781
AMRU_Ao_TTAACTCGTAGTGAAT	17904	13202	Asexual	4571
AMRU_Ao_TTAACTCGTCGACTGC	10679	6894	Asexual	5808
AMRU_Ao_TTAACTCTCCAAACAC	5676	4188	Asexual	1226
AMRU_Ao_TTAGGACAGGTGATTA	14959	9990	Asexual	5304
AMRU_Ao_TTAGGACCAAACTGTC	29583	24675	Female	8918
AMRU_Ao_TTAGGACCAACACGCC	18074	13522	Asexual	4133
AMRU_Ao_TTAGGACTCAACGCTA	13020	9340	Asexual	4691
AMRU_Ao_TTAGGCAAGAAACGCC	14702	11003	Asexual	3977
AMRU_Ao_TTAGGCAGTCCTGCTT	12624	9917	Asexual	2953
AMRU_Ao_TTAGTTCAGTGTCCAT	11322	9066	Asexual	2194
AMRU_Ao_TTAGTTCGTGGCGAAT	7473	6017	Asexual	1089
AMRU_Ao_TTAGTTCTCCGAACGC	16301	11489	Asexual	5080
AMRU_Ao_TTATGCTAGTAGTGCG	15260	11796	Asexual	2177
AMRU_Ao_TTATGCTCATTCCTCG	14799	10046	Asexual	5241
AMRU_Ao_TTCCCAGAGATGGGTC	28923	24569	Female	8735
AMRU_Ao_TTCCCAGAGCCGTCGT	9818	7705	Asexual	3779
AMRU_Ao_TTCCCAGAGGGATCTG	7077	4672	Asexual	5057
AMRU_Ao_TTCCCAGGTCCGACGT	8644	6748	Asexual	2448
AMRU_Ao_TTCGAAGCAAATACAG	8195	6359	Asexual	2887
AMRU_Ao_TTCGAAGCACGGCGTT	25212	21136	Female	8564
AMRU_Ao_TTCGAAGGTGCTCTTC	13947	9137	Asexual	5646
AMRU_Ao_TTCGAAGGTTACTGAC	13235	10632	Asexual	2781
AMRU_Ao_TTCGAAGTCGGTGTCG	4411	3292	Asexual	434
AMRU_Ao_TTCGGTCCACACATGT	10498	7000	Asexual	5252
AMRU_Ao_TTCGGTCCACTGAAGG	11587	8186	Asexual	4860
AMRU_Ao_TTCGGTCCATGACATC	6001	4372	Asexual	4509
AMRU_Ao_TTCGGTCTCGTCTGAA	7664	5096	Asexual	4913
AMRU_Ao_TTCGGTCTCTGTGCAA	9093	7005	Male	9149
AMRU_Ao_TTCTACAGTTCCCGAG	11656	9112	Asexual	2907
AMRU_Ao_TTCTACATCACGATGT	11934	9354	Asexual	3115
AMRU_Ao_TTCTACATCGTTGACA	9774	7026	Asexual	6853
AMRU_Ao_TTCTACATCTCAAGTG	12444	9952	Female	7770
AMRU_Ao_TTCTACATCTCGAGTA	16248	10611	Asexual	6124
AMRU_Ao_TTCTCAACAAGAGGCT	19024	14568	Asexual	3844
AMRU_Ao_TTCTCAAGTGTGAATA	11682	7140	Asexual	6425
AMRU_Ao_TTCTCAAGTTGCGCAC	9354	7335	Asexual	1741
AMRU_Ao_TTCTCAATCCGTTGTC	17454	12651	Asexual	4791
AMRU_Ao_TTCTCCTTCGATAGAA	13594	10384	Asexual	4047
AMRU_Ao_TTCTCCTTCTCATTCA	8764	6760	Asexual	1829
AMRU_Ao_TTCTCCTTCTTCAACT	11673	9130	Asexual	2968
AMRU_Ao_TTCTTAGAGACAAAGG	12399	9433	Asexual	3651
AMRU_Ao_TTCTTAGAGCACCGCT	17429	12889	Asexual	4471
AMRU_Ao_TTCTTAGAGGTGATAT	15398	10550	Asexual	5195
AMRU_Ao_TTCTTAGCAGTCAGCC	8434	6170	Asexual	3920
AMRU_Ao_TTCTTAGCATCCGTGG	28586	24342	Female	8864
AMRU_Ao_TTCTTAGGTACGCACC	18942	14099	Asexual	4388
AMRU_Ao_TTCTTAGTCAACACCA	7593	5815	Asexual	1433
AMRU_Ao_TTGAACGAGGATGCGT	10317	8259	Asexual	3283
AMRU_Ao_TTGAACGGTGAGCGAT	12762	8320	Asexual	5435
AMRU_Ao_TTGAACGGTTTCCACC	4145	3040	Asexual	2005
AMRU_Ao_TTGAACGTCACGACTA	3323	2180	Asexual	5285
AMRU_Ao_TTGACTTCAAGCCATT	6654	5124	Asexual	3324
AMRU_Ao_TTGACTTCATGAACCT	3012	2374	Female	7703
AMRU_Ao_TTGACTTGTCAGTGGA	13420	10499	Asexual	3510
AMRU_Ao_TTGCCGTAGTATCGAA	14115	10085	Asexual	4489
AMRU_Ao_TTGCCGTGTCAACATC	8575	6825	Asexual	1470
AMRU_Ao_TTGCCGTGTGAAAGAG	7644	5870	Asexual	89
AMRU_Ao_TTGCCGTTCTTATCTG	15589	10849	Asexual	5092
AMRU_Ao_TTGCGTCTCCATGCTC	24039	16374	Asexual	5310
AMRU_Ao_TTGGAACCACGTCAGC	11482	7414	Asexual	5361
AMRU_Ao_TTGGCAAAGCCTTGAT	14413	10710	Asexual	3239
AMRU_Ao_TTGGCAACAACACCTA	4535	3536	Asexual	1989
AMRU_Ao_TTGGCAAGTCTTGTCC	16666	13217	Asexual	1424
AMRU_Ao_TTGGCAATCAACACCA	18268	14266	Asexual	2290
AMRU_Ao_TTGTAGGAGGGCTTCC	18489	13878	Asexual	4206
AMRU_Ao_TTTACTGAGTCGAGTG	11594	8530	Asexual	3766
AMRU_Ao_TTTACTGCACAAGACG	17482	12144	Asexual	4990
AMRU_Ao_TTTACTGCACAAGCCC	12560	8710	Asexual	5161
AMRU_Ao_TTTACTGTCATGCTCC	8223	6310	Asexual	2935
AMRU_Ao_TTTATGCAGCAATCTC	33717	28587	Female	8705
AMRU_Ao_TTTCCTCGTCTGCCAG	13603	10674	Asexual	2548
AMRU_Ao_TTTGCGCAGGAGCGAG	13879	10562	Asexual	4523
AMRU_Ao_TTTGCGCAGGCGACAT	16412	12324	Asexual	3703
AMRU_Ao_TTTGCGCCACAACTGT	12703	10095	Asexual	3136
AMRU_Ao_TTTGCGCGTAACGCGA	11970	9577	Asexual	1820
AMRU_Ao_TTTGCGCGTATCACCA	6839	4810	Asexual	6713
AMRU_Ao_TTTGCGCGTTCTGGTA	6155	3637	Asexual	5609
AMRU_Ao_TTTGGTTAGTGGGCTA	15266	10565	Asexual	4980
AMRU_Ao_TTTGTCAAGATGCCAG	9277	6784	Asexual	6852
AMRU_Ao_TTTGTCACAGTATAAG	12606	9419	Asexual	4487
AMRU_Ao_TTTGTCAGTCCCGACA	13233	10775	Asexual	3506
AMRU_CQ_AAACCTGAGGGAACGG	11191	9090	Asexual	2595
AMRU_CQ_AAACCTGCATCGGGTC	11176	8568	Asexual	1654
AMRU_CQ_AAACCTGTCGTCCAGG	9582	7180	Asexual	3141
AMRU_CQ_AAACGGGAGTGCAAGC	17608	14590	Asexual	2430
AMRU_CQ_AAACGGGCATGGGACA	10197	8268	Asexual	1213
AMRU_CQ_AAACGGGGTGAAGGCT	15565	11637	Asexual	3737
AMRU_CQ_AAACGGGTCGCATGGC	3916	3097	Asexual	2375
AMRU_CQ_AAACGGGTCGCCTGTT	6979	5238	Asexual	3474
AMRU_CQ_AAAGATGAGAAGATTC	8567	6979	Asexual	2799
AMRU_CQ_AAAGATGCACTGTTAG	10277	8039	Female	7811
AMRU_CQ_AAAGATGCAGACGCTC	11929	7326	Asexual	7311
AMRU_CQ_AAAGATGGTCCATCCT	13684	10919	Asexual	2429
AMRU_CQ_AAAGATGGTGTATGGG	11880	9503	Asexual	2275
AMRU_CQ_AAAGATGTCTGTTGAG	5250	4120	Asexual	1485
AMRU_CQ_AAAGCAAAGATCGGGT	8705	6815	Asexual	2136
AMRU_CQ_AAAGCAAAGGCTAGCA	11710	9371	Asexual	2700
AMRU_CQ_AAAGCAAAGTACACCT	12243	9630	Asexual	2958
AMRU_CQ_AAAGCAAGTTGACGTT	16410	13263	Asexual	3636
AMRU_CQ_AAAGTAGGTCTGCGGT	8304	6382	Asexual	2370
AMRU_CQ_AAAGTAGTCGCGTAGC	6778	5532	Asexual	1686
AMRU_CQ_AAAGTAGTCTCTGCTG	4279	3255	Asexual	2705
AMRU_CQ_AAATGCCAGACTAAGT	8176	6169	Asexual	1914
AMRU_CQ_AACACGTAGAACTGTA	15551	12571	Asexual	2526
AMRU_CQ_AACACGTAGTGCAAGC	18181	14631	Asexual	3605
AMRU_CQ_AACACGTCAAGCTGTT	13186	10132	Asexual	2116
AMRU_CQ_AACACGTCATGGTTGT	7311	5809	Asexual	3190
AMRU_CQ_AACACGTGTCTCAACA	14035	10972	Asexual	1704
AMRU_CQ_AACCATGAGTTGCAGG	13248	10289	Asexual	2218
AMRU_CQ_AACCATGCAATCAGAA	25131	20912	Female	8232
AMRU_CQ_AACCATGCACCTATCC	13180	10295	Asexual	3001
AMRU_CQ_AACCATGCAGGCTGAA	15016	11889	Asexual	2777
AMRU_CQ_AACCATGGTAGAGGAA	9000	7046	Asexual	1056
AMRU_CQ_AACCATGGTCGAATCT	6992	5731	Asexual	1784
AMRU_CQ_AACCGCGTCAACCATG	10128	7431	Asexual	1783
AMRU_CQ_AACGTTGAGACCTTTG	7553	6040	Asexual	873
AMRU_CQ_AACGTTGAGTGTCTCA	11478	7979	Asexual	7385
AMRU_CQ_AACGTTGGTTCCATGA	9448	7280	Asexual	3349
AMRU_CQ_AACTCAGAGGTTCCTA	8030	6222	Asexual	3939
AMRU_CQ_AACTCAGAGTGTCCCG	5670	4275	Male	9099
AMRU_CQ_AACTCAGCATGCAATC	9139	6573	Asexual	4343
AMRU_CQ_AACTCAGGTCGGCTCA	5044	3900	Asexual	3898
AMRU_CQ_AACTCAGTCACCGGGT	7035	5272	Asexual	6935
AMRU_CQ_AACTCAGTCCTACAGA	4206	3277	Asexual	3225
AMRU_CQ_AACTCCCAGATGTCGG	14561	11914	Asexual	1903
AMRU_CQ_AACTCCCAGGGCTTCC	15188	12060	Asexual	2956
AMRU_CQ_AACTCCCCATACCATG	15627	12303	Asexual	2469
AMRU_CQ_AACTCCCGTAAGTTCC	4326	3422	Asexual	1928
AMRU_CQ_AACTCCCGTGTCAATC	18840	15204	Asexual	2874
AMRU_CQ_AACTCTTAGCAGACTG	14712	11265	Asexual	3875
AMRU_CQ_AACTCTTAGCTTCGCG	4027	3139	Asexual	3082
AMRU_CQ_AACTCTTCACCGTTGG	13093	10000	Asexual	2335
AMRU_CQ_AACTCTTCATCGGAAG	9801	7668	Asexual	2775
AMRU_CQ_AACTCTTTCAGCTGGC	13800	10968	Asexual	2345
AMRU_CQ_AACTCTTTCCAGAAGG	11227	8700	Asexual	4053
AMRU_CQ_AACTCTTTCCGAGCCA	12921	10086	Asexual	1739
AMRU_CQ_AACTGGTAGCCTTGAT	12880	9995	Asexual	2332
AMRU_CQ_AACTGGTAGCGTAATA	7908	5960	Asexual	4286
AMRU_CQ_AACTGGTAGGAGCGAG	12375	9872	Asexual	3230
AMRU_CQ_AACTGGTCACCTGGTG	3653	2949	Female	7663
AMRU_CQ_AACTGGTCATCTCCCA	16464	12671	Asexual	1991
AMRU_CQ_AACTGGTGTAAACACA	17698	13795	Asexual	2592
AMRU_CQ_AACTTTCAGACCTTTG	12355	9743	Asexual	3515
AMRU_CQ_AACTTTCCATCGACGC	7430	5881	Asexual	1628
AMRU_CQ_AACTTTCGTTCAGACT	7494	5811	Asexual	1974
AMRU_CQ_AACTTTCTCTAACCGA	14103	11099	Asexual	2656
AMRU_CQ_AAGACCTAGAGCCTAG	11256	9249	Asexual	1613
AMRU_CQ_AAGACCTCAACTGGCC	9731	7742	Asexual	4112
AMRU_CQ_AAGACCTGTCTAGGTT	8741	6771	Asexual	3717
AMRU_CQ_AAGCCGCAGACCACGA	5055	3964	Asexual	238
AMRU_CQ_AAGCCGCAGAGTACAT	13598	10927	Asexual	2219
AMRU_CQ_AAGCCGCAGCTCCTTC	10405	8321	Asexual	2685
AMRU_CQ_AAGCCGCGTAGCTGCC	10406	8370	Asexual	1963
AMRU_CQ_AAGCCGCTCCCTGACT	12689	9970	Asexual	1467
AMRU_CQ_AAGGAGCAGCGGATCA	14714	11633	Asexual	3679
AMRU_CQ_AAGGAGCAGTGGGTTG	4844	3818	Asexual	4564
AMRU_CQ_AAGGAGCCAGACAAGC	14998	12161	Asexual	2806
AMRU_CQ_AAGGAGCCATACGCCG	16453	13495	Asexual	1413
AMRU_CQ_AAGGAGCTCAGGCGAA	10632	8438	Asexual	1091
AMRU_CQ_AAGGCAGAGGAATTAC	16079	12677	Asexual	3077
AMRU_CQ_AAGGCAGCAGTCGTGC	20986	16135	Asexual	2503
AMRU_CQ_AAGGCAGGTACAGCAG	14208	11426	Asexual	3697
AMRU_CQ_AAGGCAGTCAAGGCTT	19439	16389	Female	8305
AMRU_CQ_AAGGTTCCACGGATAG	9870	7729	Asexual	1075
AMRU_CQ_AAGGTTCTCAGCTCGG	7965	5948	Asexual	3998
AMRU_CQ_AAGGTTCTCAGGCCCA	12479	9822	Asexual	2668
AMRU_CQ_AAGTCTGAGTACACCT	24337	20485	Female	8351
AMRU_CQ_AAGTCTGGTTCTGGTA	4806	3547	Asexual	4727
AMRU_CQ_AATCCAGCACACATGT	10603	7787	Asexual	4102
AMRU_CQ_AATCCAGCACGACTCG	6935	5167	Asexual	3728
AMRU_CQ_AATCCAGGTAAGTGGC	5907	4432	Asexual	2679
AMRU_CQ_AATCCAGGTATCGCAT	6386	5029	Asexual	2712
AMRU_CQ_AATCCAGTCGCTAGCG	6452	5051	Asexual	1761
AMRU_CQ_AATCGGTAGCTAAACA	9132	7248	Asexual	3430
AMRU_CQ_AATCGGTCATATACCG	7384	6100	Asexual	1838
AMRU_CQ_AATCGGTGTTCCGTCT	7428	5876	Asexual	3162
AMRU_CQ_ACACCAAAGCTCTCGG	17765	14282	Asexual	3021
AMRU_CQ_ACACCAATCTCAACTT	5452	4184	Asexual	1860
AMRU_CQ_ACACCCTAGGAGCGAG	11554	9107	Asexual	1951
AMRU_CQ_ACACCCTAGTTACCCA	15457	11982	Asexual	2519
AMRU_CQ_ACACCCTCAGCTGTAT	9075	6632	Asexual	4609
AMRU_CQ_ACACCCTTCATGTCTT	12139	7767	Asexual	6045
AMRU_CQ_ACACCGGCATGGTCAT	12443	9856	Asexual	3659
AMRU_CQ_ACACCGGGTATAATGG	14927	11657	Asexual	2677
AMRU_CQ_ACACCGGGTCTAGTCA	3623	2821	Asexual	2670
AMRU_CQ_ACACCGGGTCTAGTGT	13757	10804	Asexual	2350
AMRU_CQ_ACACCGGGTGGTACAG	14717	11543	Asexual	2410
AMRU_CQ_ACACCGGGTTATTCTC	20867	16595	Asexual	1915
AMRU_CQ_ACACCGGTCTGCGTAA	10609	8079	Asexual	2300
AMRU_CQ_ACACTGAGTAGCGCAA	6407	4704	Asexual	4350
AMRU_CQ_ACAGCCGCAAGACACG	13566	10981	Asexual	1772
AMRU_CQ_ACAGCCGCAGTAAGAT	4297	3293	Asexual	4039
AMRU_CQ_ACAGCCGCATATGAGA	3421	2699	Asexual	2475
AMRU_CQ_ACAGCCGGTCTAACGT	3787	3165	Female	8072
AMRU_CQ_ACAGCCGTCTGTTTGT	14965	11338	Asexual	4191
AMRU_CQ_ACAGCTAAGACTAGGC	14816	11923	Asexual	1887
AMRU_CQ_ACAGCTACAAAGGCGT	14848	11709	Asexual	2115
AMRU_CQ_ACATACGAGCCGATTT	10809	8513	Asexual	1895
AMRU_CQ_ACATACGAGCGTAATA	8903	6861	Asexual	2160
AMRU_CQ_ACATACGCATCTATGG	16156	12278	Asexual	3458
AMRU_CQ_ACATACGGTCACAAGG	15856	12741	Asexual	1138
AMRU_CQ_ACATACGGTTTGCATG	4443	3525	Asexual	2146
AMRU_CQ_ACATCAGAGATCGATA	14901	11513	Asexual	3780
AMRU_CQ_ACATCAGGTTAAGTAG	8792	6999	Asexual	2316
AMRU_CQ_ACATGGTAGAACTGTA	7410	5886	Asexual	1482
AMRU_CQ_ACATGGTAGACTGGGT	14785	11749	Asexual	3247
AMRU_CQ_ACATGGTAGATAGCAT	8573	6536	Asexual	925
AMRU_CQ_ACATGGTAGTCAATAG	12336	9792	Asexual	1598
AMRU_CQ_ACATGGTCAAGCCCAC	5542	4337	Asexual	2687
AMRU_CQ_ACATGGTCACCAGGTC	9066	7103	Asexual	2262
AMRU_CQ_ACATGGTGTCTTCAAG	6413	4789	Asexual	2182
AMRU_CQ_ACATGGTGTGCAGACA	8341	6440	Asexual	257
AMRU_CQ_ACCAGTAAGATCGATA	15133	11765	Asexual	4019
AMRU_CQ_ACCAGTAAGCCTCGTG	7536	6009	Asexual	1409
AMRU_CQ_ACCAGTAGTAGCGTAG	12468	9875	Asexual	2972
AMRU_CQ_ACCAGTATCCTTTACA	6944	5346	Asexual	1737
AMRU_CQ_ACCAGTATCTCGCTTG	3338	2644	Asexual	2463
AMRU_CQ_ACCCACTAGACTAGGC	13197	10472	Asexual	1708
AMRU_CQ_ACCCACTGTACCATCA	5536	4072	Asexual	1164
AMRU_CQ_ACCGTAATCCGAACGC	9604	7632	Asexual	1909
AMRU_CQ_ACCTTTACAGGTGGAT	13019	10425	Asexual	3011
AMRU_CQ_ACCTTTAGTCAGAATA	13784	10877	Asexual	2138
AMRU_CQ_ACCTTTAGTGTTTGTG	3859	2727	Asexual	4432
AMRU_CQ_ACGAGCCAGGTGATAT	9938	8223	Asexual	1734
AMRU_CQ_ACGAGCCCACTTCTGC	11361	8466	Asexual	3626
AMRU_CQ_ACGAGCCGTTTGTGTG	9942	8169	Asexual	1280
AMRU_CQ_ACGAGGACATGTCGAT	12095	9334	Asexual	2605
AMRU_CQ_ACGAGGAGTCAGAAGC	10956	8584	Asexual	1830
AMRU_CQ_ACGAGGATCACCCGAG	5690	4162	Asexual	2373
AMRU_CQ_ACGAGGATCAGTGCAT	11691	9215	Asexual	1962
AMRU_CQ_ACGATACTCTCTAGGA	9544	7588	Asexual	1674
AMRU_CQ_ACGATGTCATCACCCT	15173	11580	Asexual	4362
AMRU_CQ_ACGATGTTCAACTCTT	15927	12498	Asexual	1664
AMRU_CQ_ACGATGTTCAGTGTTG	7518	5889	Asexual	2190
AMRU_CQ_ACGCAGCCAAGAGTCG	5800	4365	Asexual	1550
AMRU_CQ_ACGCAGCCATTACGAC	15291	12039	Asexual	3731
AMRU_CQ_ACGCAGCGTTCCTCCA	16254	13056	Asexual	3080
AMRU_CQ_ACGCCAGCACTGCCAG	7492	5807	Asexual	2369
AMRU_CQ_ACGCCAGGTAACGCGA	3301	2192	Asexual	6287
AMRU_CQ_ACGCCGACAAGACACG	13585	10749	Asexual	1279
AMRU_CQ_ACGCCGACAATAGAGT	8128	6222	Asexual	1764
AMRU_CQ_ACGCCGACACCAGGCT	30293	24118	Asexual	1603
AMRU_CQ_ACGCCGATCTGAGTGT	5473	4610	Female	8030
AMRU_CQ_ACGGAGAGTCAATACC	15167	11821	Asexual	2875
AMRU_CQ_ACGGAGAGTCGAACAG	7660	6107	Asexual	1924
AMRU_CQ_ACGGAGATCGTGGACC	12418	9852	Asexual	1228
AMRU_CQ_ACGGCCAAGCTATGCT	9917	7604	Asexual	3170
AMRU_CQ_ACGGGCTGTCCGTCAG	3453	2810	Asexual	2849
AMRU_CQ_ACGGGCTGTCGAACAG	14415	11416	Asexual	3145
AMRU_CQ_ACGGGTCAGGCTCTTA	16670	13012	Asexual	2927
AMRU_CQ_ACGGGTCAGGGCACTA	10481	8667	Asexual	1423
AMRU_CQ_ACGGGTCCAGTTTACG	12827	10012	Asexual	3625
AMRU_CQ_ACGGGTCTCAAAGACA	10790	7739	Asexual	5002
AMRU_CQ_ACGTCAAAGAGAACAG	10987	8822	Asexual	3376
AMRU_CQ_ACGTCAATCATGTGGT	11737	8923	Asexual	4201
AMRU_CQ_ACGTCAATCCGAATGT	4570	3547	Asexual	2349
AMRU_CQ_ACGTCAATCTGTCAAG	7471	5840	Asexual	3855
AMRU_CQ_ACTATCTAGAGCTGGT	5181	4050	Asexual	3438
AMRU_CQ_ACTATCTAGTACGTAA	9529	7543	Asexual	2125
AMRU_CQ_ACTATCTAGTGCGTGA	8668	6187	Asexual	5037
AMRU_CQ_ACTATCTTCCAGAAGG	8225	6646	Asexual	2352
AMRU_CQ_ACTATCTTCCTGCTTG	12236	9617	Asexual	2877
AMRU_CQ_ACTATCTTCTTTAGGG	4556	3479	Asexual	4130
AMRU_CQ_ACTGAACAGCTCTCGG	6005	4704	Asexual	1713
AMRU_CQ_ACTGAACAGGCAGGTT	14447	11099	Asexual	3684
AMRU_CQ_ACTGAACTCGTACGGC	3573	2702	Asexual	3546
AMRU_CQ_ACTGAGTAGACCACGA	11588	9512	Asexual	923
AMRU_CQ_ACTGAGTAGCTTATCG	10142	8061	Asexual	1593
AMRU_CQ_ACTGAGTCAGCCTGTG	3994	3226	Asexual	1526
AMRU_CQ_ACTGAGTTCAAGCCTA	12504	9833	Asexual	1907
AMRU_CQ_ACTGATGCAGGATCGA	14645	11181	Asexual	2423
AMRU_CQ_ACTGATGGTTGTGGCC	10118	8121	Asexual	2517
AMRU_CQ_ACTGATGTCATAACCG	5618	4550	Asexual	2090
AMRU_CQ_ACTGCTCGTAAGAGAG	14058	11314	Asexual	1965
AMRU_CQ_ACTGCTCGTTGTGGCC	8669	6622	Asexual	2269
AMRU_CQ_ACTGCTCTCCAAACAC	3887	2801	Asexual	4418
AMRU_CQ_ACTGTCCAGTCTTGCA	9574	7672	Asexual	1154
AMRU_CQ_ACTGTCCAGTGAAGAG	28082	23774	Female	8545
AMRU_CQ_ACTGTCCCATTATCTC	13992	10772	Asexual	3308
AMRU_CQ_ACTGTCCGTTATTCTC	14058	11398	Asexual	1217
AMRU_CQ_ACTGTCCGTTCGTCTC	14221	11059	Asexual	2937
AMRU_CQ_ACTTACTAGTGTTTGC	9254	7363	Asexual	1476
AMRU_CQ_ACTTACTCAGTGGGAT	10693	8366	Asexual	1921
AMRU_CQ_ACTTACTGTTCCTCCA	9052	7438	Asexual	1152
AMRU_CQ_ACTTGTTCAGGGTTAG	10451	8022	Asexual	4030
AMRU_CQ_ACTTGTTGTAGAGGAA	6395	5098	Asexual	2174
AMRU_CQ_ACTTGTTTCCGTACAA	11103	8431	Asexual	2033
AMRU_CQ_ACTTGTTTCGCACTCT	11101	9084	Asexual	2480
AMRU_CQ_ACTTTCAAGAAACCTA	12525	9898	Asexual	2228
AMRU_CQ_ACTTTCAGTGCGGTAA	6558	5041	Asexual	2270
AMRU_CQ_ACTTTCATCCGGGTGT	10610	8481	Asexual	2865
AMRU_CQ_AGAATAGAGACAGACC	9185	7021	Asexual	2754
AMRU_CQ_AGAATAGAGTCCATAC	25125	19672	Asexual	3102
AMRU_CQ_AGAATAGCAGGTCTCG	3852	2988	Asexual	1730
AMRU_CQ_AGAATAGCATGGGAAC	4538	3782	Asexual	1012
AMRU_CQ_AGAATAGCATGGTTGT	6634	5272	Asexual	1202
AMRU_CQ_AGAATAGGTAAACACA	3999	3031	Asexual	3622
AMRU_CQ_AGAATAGTCCCTCAGT	10612	8429	Asexual	1431
AMRU_CQ_AGAATAGTCGATAGAA	8792	6443	Asexual	4484
AMRU_CQ_AGACGTTAGATCGATA	17558	13693	Asexual	1827
AMRU_CQ_AGACGTTGTAAACACA	11419	9183	Asexual	1391
AMRU_CQ_AGACGTTGTAGTACCT	6376	5050	Asexual	1702
AMRU_CQ_AGAGCGAAGGACTGGT	10248	8088	Asexual	1559
AMRU_CQ_AGAGCGACAATGGACG	12495	9868	Asexual	2421
AMRU_CQ_AGAGCGACACGTTGGC	17057	12377	Asexual	4934
AMRU_CQ_AGAGCGACAGCTTAAC	15465	12199	Asexual	1500
AMRU_CQ_AGAGCGATCAACTCTT	10375	8365	Asexual	3355
AMRU_CQ_AGAGCGATCCTAGAAC	10624	8492	Asexual	1797
AMRU_CQ_AGAGCTTCACGAAATA	9789	7775	Asexual	2321
AMRU_CQ_AGAGCTTCAGCCTTTC	8179	6363	Asexual	2853
AMRU_CQ_AGAGCTTGTACTCTCC	6928	5578	Asexual	3004
AMRU_CQ_AGAGCTTTCAACGGGA	6157	4631	Asexual	2250
AMRU_CQ_AGAGCTTTCGTGGTCG	6174	4723	Asexual	2277
AMRU_CQ_AGAGTGGAGACTAGAT	4029	3131	Asexual	2789
AMRU_CQ_AGAGTGGCAGTATCTG	9800	7701	Asexual	1386
AMRU_CQ_AGAGTGGGTGAGCGAT	13028	10058	Asexual	3576
AMRU_CQ_AGAGTGGGTGGTAACG	11820	9608	Asexual	1578
AMRU_CQ_AGAGTGGTCAGAGGTG	5221	4074	Asexual	2840
AMRU_CQ_AGATCTGAGTATTGGA	11614	9301	Asexual	3195
AMRU_CQ_AGATCTGTCCAAACAC	4640	3776	Asexual	1439
AMRU_CQ_AGATTGCTCTTGCAAG	12260	9103	Asexual	4235
AMRU_CQ_AGCAGCCAGTAGATGT	8369	6242	Asexual	3453
AMRU_CQ_AGCAGCCAGTCGAGTG	7470	6006	Asexual	2664
AMRU_CQ_AGCAGCCTCCCACTTG	4408	3216	Asexual	4470
AMRU_CQ_AGCATACGTAGAAGGA	6956	5475	Asexual	4093
AMRU_CQ_AGCATACGTCCGACGT	11849	9137	Asexual	1722
AMRU_CQ_AGCATACTCAAAGACA	15975	12459	Asexual	2488
AMRU_CQ_AGCATACTCGCTGATA	9179	7147	Asexual	2167
AMRU_CQ_AGCCTAACACCGTTGG	14583	11841	Asexual	2363
AMRU_CQ_AGCGGTCAGCGTCTAT	8486	6689	Asexual	1277
AMRU_CQ_AGCGGTCAGCTAGTCT	24312	18713	Asexual	3093
AMRU_CQ_AGCGGTCCACTGTCGG	6636	5051	Asexual	3054
AMRU_CQ_AGCGGTCTCCCGACTT	15720	12566	Asexual	3275
AMRU_CQ_AGCGTATAGGCAAAGA	12133	9143	Asexual	4095
AMRU_CQ_AGCGTATGTAGCTGCC	6361	5199	Asexual	1889
AMRU_CQ_AGCGTATGTTGGTTTG	6694	5176	Asexual	2263
AMRU_CQ_AGCGTCGAGGCATTGG	3501	2990	Female	8120
AMRU_CQ_AGCGTCGGTCACAAGG	10088	8123	Asexual	2141
AMRU_CQ_AGCGTCGTCTGGTATG	4565	3422	Asexual	3842
AMRU_CQ_AGCTCCTAGCTAAACA	14467	11815	Asexual	2936
AMRU_CQ_AGCTCCTAGGGAGTAA	13272	10422	Asexual	2436
AMRU_CQ_AGCTCCTTCCACTCCA	20206	15582	Asexual	3337
AMRU_CQ_AGCTCCTTCCCGGATG	6649	5105	Asexual	3837
AMRU_CQ_AGCTCCTTCGATGAGG	15047	11470	Asexual	3022
AMRU_CQ_AGCTCCTTCGGCCGAT	18541	13806	Asexual	4689
AMRU_CQ_AGCTCTCAGGATTCGG	4655	3495	Asexual	3463
AMRU_CQ_AGCTCTCCAGTTAACC	17086	13612	Asexual	2176
AMRU_CQ_AGCTCTCTCGAGGTAG	12448	10020	Asexual	879
AMRU_CQ_AGCTTGAAGAAGAAGC	12960	9743	Asexual	4392
AMRU_CQ_AGCTTGAAGAGCTATA	15765	12286	Asexual	2338
AMRU_CQ_AGCTTGAGTCTAGAGG	18412	15328	Female	8357
AMRU_CQ_AGCTTGATCTGGTGTA	17330	13592	Asexual	3014
AMRU_CQ_AGGCCACCAGCATGAG	12595	10131	Asexual	1979
AMRU_CQ_AGGCCACGTCATTAGC	8541	6937	Asexual	3129
AMRU_CQ_AGGCCACGTCGACTAT	8692	6983	Asexual	1877
AMRU_CQ_AGGCCACTCCCAAGAT	12948	9855	Asexual	3803
AMRU_CQ_AGGCCGTAGTGCCAGA	18614	15678	Female	8206
AMRU_CQ_AGGCCGTAGTTAAGTG	14334	11464	Asexual	2721
AMRU_CQ_AGGCCGTGTCTGATTG	8591	7054	Asexual	3476
AMRU_CQ_AGGCCGTGTTAGATGA	12670	9928	Asexual	3459
AMRU_CQ_AGGCCGTTCCTAGTGA	7433	5665	Asexual	1891
AMRU_CQ_AGGGAGTCACACAGAG	7519	5477	Asexual	4512
AMRU_CQ_AGGGATGAGATGGCGT	9910	7701	Asexual	3835
AMRU_CQ_AGGGATGAGTCTCCTC	6405	5031	Asexual	4037
AMRU_CQ_AGGGATGCACGCGAAA	12439	9705	Asexual	2801
AMRU_CQ_AGGGATGCAGCTATTG	13502	10539	Asexual	3446
AMRU_CQ_AGGGATGGTGGTTTCA	6394	5069	Asexual	1810
AMRU_CQ_AGGGTGAAGAAACGAG	13395	10667	Asexual	3116
AMRU_CQ_AGGGTGAAGAGCTTCT	12526	10072	Asexual	1935
AMRU_CQ_AGGGTGAAGCTAAGAT	5033	3826	Asexual	2521
AMRU_CQ_AGGGTGACAATCCGAT	5473	4288	Asexual	4330
[truncated: 12,100 more rows]
