# Supplementary material for: Single-cell transcription analysis of Plasmodium vivax blood-stage parasites identifies stage- and species-specific profiles of expression
Source: PLoS Biol. 2020 May 4;18(5):e3000711. doi: 10.1371/journal.pbio.3000711 (PMC7224573; doi:10.1371/journal.pbio.3000711)
Supplement: S19 Data — (XLSX) [file pbio.3000711.s048.xlsx]

## Sheet: data 19A
GEM	Strain	Monkey	Rank	Window	Expr
AMRU_Ao_AAACCTGAGCTCAACT	AMRU	Ao	1414	PvP01_09_v1_685_-_PVP01_0905800_-1	0
AMRU_Ao_AAACCTGAGTTGAGAT	AMRU	Ao	4806	PvP01_09_v1_685_-_PVP01_0905800_-1	0.500726
AMRU_Ao_AAACCTGGTCAATACC	AMRU	Ao	2836	PvP01_09_v1_685_-_PVP01_0905800_-1	0.477755
AMRU_Ao_AAACCTGGTCATATCG	AMRU	Ao	165	PvP01_09_v1_685_-_PVP01_0905800_-1	0
AMRU_Ao_AAACCTGTCTCGAGTA	AMRU	Ao	4004	PvP01_09_v1_685_-_PVP01_0905800_-1	0.421171
AMRU_Ao_AAACGGGGTTACGGAG	AMRU	Ao	7193	PvP01_09_v1_685_-_PVP01_0905800_-1	0
AMRU_Ao_AAACGGGGTTATCCGA	AMRU	Ao	36	PvP01_09_v1_685_-_PVP01_0905800_-1	0
AMRU_Ao_AAAGATGAGGTGCACA	AMRU	Ao	4375	PvP01_09_v1_685_-_PVP01_0905800_-1	0.119081
AMRU_Ao_AAAGATGCAGTCGATT	AMRU	Ao	2336	PvP01_09_v1_685_-_PVP01_0905800_-1	0
AMRU_Ao_AAAGATGCATCGTCGG	AMRU	Ao	4878	PvP01_09_v1_685_-_PVP01_0905800_-1	0.376628
AMRU_Ao_AAAGATGCATGGATGG	AMRU	Ao	1248	PvP01_09_v1_685_-_PVP01_0905800_-1	0
AMRU_Ao_AAAGATGGTGCTCTTC	AMRU	Ao	8874	PvP01_09_v1_685_-_PVP01_0905800_-1	0.116452
AMRU_Ao_AAAGATGTCATGCTCC	AMRU	Ao	8388	PvP01_09_v1_685_-_PVP01_0905800_-1	0.0827632
AMRU_Ao_AAAGATGTCTCCTATA	AMRU	Ao	8794	PvP01_09_v1_685_-_PVP01_0905800_-1	0.0771863
AMRU_Ao_AAAGCAAAGACACTAA	AMRU	Ao	4505	PvP01_09_v1_685_-_PVP01_0905800_-1	0.809512
AMRU_Ao_AAAGCAAGTTAAGTAG	AMRU	Ao	8767	PvP01_09_v1_685_-_PVP01_0905800_-1	0.120344
AMRU_Ao_AAAGCAATCATCTGCC	AMRU	Ao	3377	PvP01_09_v1_685_-_PVP01_0905800_-1	0.573298
AMRU_Ao_AAAGTAGAGCTACCGC	AMRU	Ao	5164	PvP01_09_v1_685_-_PVP01_0905800_-1	0.262456
AMRU_Ao_AAAGTAGGTGGCAAAC	AMRU	Ao	8613	PvP01_09_v1_685_-_PVP01_0905800_-1	0.215606
AMRU_Ao_AAAGTAGGTGTCAATC	AMRU	Ao	4659	PvP01_09_v1_685_-_PVP01_0905800_-1	0.57151
AMRU_Ao_AAATGCCAGCCAGGAT	AMRU	Ao	2439	PvP01_09_v1_685_-_PVP01_0905800_-1	0
AMRU_Ao_AAATGCCCATAGACTC	AMRU	Ao	5947	PvP01_09_v1_685_-_PVP01_0905800_-1	0.322269
AMRU_Ao_AAATGCCGTAGGCTGA	AMRU	Ao	5388	PvP01_09_v1_685_-_PVP01_0905800_-1	0.79291
AMRU_Ao_AAATGCCGTCCCTTGT	AMRU	Ao	6020	PvP01_09_v1_685_-_PVP01_0905800_-1	0.460405
AMRU_Ao_AAATGCCGTTGTGGCC	AMRU	Ao	3957	PvP01_09_v1_685_-_PVP01_0905800_-1	0.0759705
AMRU_Ao_AAATGCCTCGGTCTAA	AMRU	Ao	644	PvP01_09_v1_685_-_PVP01_0905800_-1	0
AMRU_Ao_AACACGTAGATATGGT	AMRU	Ao	1437	PvP01_09_v1_685_-_PVP01_0905800_-1	0
AMRU_Ao_AACACGTAGGTAGCCA	AMRU	Ao	6963	PvP01_09_v1_685_-_PVP01_0905800_-1	0
AMRU_Ao_AACACGTAGTCACGCC	AMRU	Ao	4636	PvP01_09_v1_685_-_PVP01_0905800_-1	0.192184
AMRU_Ao_AACACGTGTCGGCACT	AMRU	Ao	6259	PvP01_09_v1_685_-_PVP01_0905800_-1	0.818121
AMRU_Ao_AACACGTGTGTGGCTC	AMRU	Ao	4102	PvP01_09_v1_685_-_PVP01_0905800_-1	0.0387762
AMRU_Ao_AACACGTTCCAGTAGT	AMRU	Ao	3441	PvP01_09_v1_685_-_PVP01_0905800_-1	0.46408
AMRU_Ao_AACACGTTCGTCCGTT	AMRU	Ao	4598	PvP01_09_v1_685_-_PVP01_0905800_-1	1.42221
AMRU_Ao_AACCATGAGTTTAGGA	AMRU	Ao	39	PvP01_09_v1_685_-_PVP01_0905800_-1	0
AMRU_Ao_AACCATGCACGAAACG	AMRU	Ao	3715	PvP01_09_v1_685_-_PVP01_0905800_-1	0.140371
AMRU_Ao_AACCGCGAGATATACG	AMRU	Ao	3216	PvP01_09_v1_685_-_PVP01_0905800_-1	0.111074
AMRU_Ao_AACCGCGCATGCTAGT	AMRU	Ao	7387	PvP01_09_v1_685_-_PVP01_0905800_-1	0
AMRU_Ao_AACGTTGAGTGTCTCA	AMRU	Ao	8805	PvP01_09_v1_685_-_PVP01_0905800_-1	0.192971
AMRU_Ao_AACTCCCCACCGAAAG	AMRU	Ao	7650	PvP01_09_v1_685_-_PVP01_0905800_-1	0
AMRU_Ao_AACTCCCGTATAGGGC	AMRU	Ao	3112	PvP01_09_v1_685_-_PVP01_0905800_-1	0.161134
AMRU_Ao_AACTCCCTCACATGCA	AMRU	Ao	5200	PvP01_09_v1_685_-_PVP01_0905800_-1	0.104521
AMRU_Ao_AACTCTTCAACTGCTA	AMRU	Ao	5029	PvP01_09_v1_685_-_PVP01_0905800_-1	1.08436
AMRU_Ao_AACTCTTTCACTATTC	AMRU	Ao	3408	PvP01_09_v1_685_-_PVP01_0905800_-1	0.32228
AMRU_Ao_AACTGGTCAAGCTGAG	AMRU	Ao	2477	PvP01_09_v1_685_-_PVP01_0905800_-1	0.125047
AMRU_Ao_AACTGGTGTGCGAAAC	AMRU	Ao	1386	PvP01_09_v1_685_-_PVP01_0905800_-1	0.146542
AMRU_Ao_AACTGGTGTGTGACCC	AMRU	Ao	1184	PvP01_09_v1_685_-_PVP01_0905800_-1	0
AMRU_Ao_AACTGGTTCATGCTCC	AMRU	Ao	3022	PvP01_09_v1_685_-_PVP01_0905800_-1	0.0639182
AMRU_Ao_AACTGGTTCTGCGACG	AMRU	Ao	4121	PvP01_09_v1_685_-_PVP01_0905800_-1	1.00234
AMRU_Ao_AACTGGTTCTGTCAAG	AMRU	Ao	8455	PvP01_09_v1_685_-_PVP01_0905800_-1	0.185705
AMRU_Ao_AACTTTCAGGTGATTA	AMRU	Ao	4177	PvP01_09_v1_685_-_PVP01_0905800_-1	0.10553
AMRU_Ao_AACTTTCCAATCTACG	AMRU	Ao	5004	PvP01_09_v1_685_-_PVP01_0905800_-1	0.960012
AMRU_Ao_AACTTTCCATATGAGA	AMRU	Ao	3390	PvP01_09_v1_685_-_PVP01_0905800_-1	0.423482
AMRU_Ao_AAGACCTAGGAGTACC	AMRU	Ao	2872	PvP01_09_v1_685_-_PVP01_0905800_-1	0.754848
AMRU_Ao_AAGACCTCACTTAAGC	AMRU	Ao	8467	PvP01_09_v1_685_-_PVP01_0905800_-1	0.0784068
AMRU_Ao_AAGACCTCATCCCATC	AMRU	Ao	5285	PvP01_09_v1_685_-_PVP01_0905800_-1	0.469098
AMRU_Ao_AAGACCTCATTCCTGC	AMRU	Ao	8850	PvP01_09_v1_685_-_PVP01_0905800_-1	0.134909
AMRU_Ao_AAGACCTTCAGCGATT	AMRU	Ao	8096	PvP01_09_v1_685_-_PVP01_0905800_-1	0.0249283
AMRU_Ao_AAGCCGCAGCCGGTAA	AMRU	Ao	3072	PvP01_09_v1_685_-_PVP01_0905800_-1	0.300008
AMRU_Ao_AAGCCGCTCAAGATCC	AMRU	Ao	2884	PvP01_09_v1_685_-_PVP01_0905800_-1	0.138074
AMRU_Ao_AAGCCGCTCGCCAAAT	AMRU	Ao	5175	PvP01_09_v1_685_-_PVP01_0905800_-1	0.136864
AMRU_Ao_AAGGAGCAGGTCGGAT	AMRU	Ao	3607	PvP01_09_v1_685_-_PVP01_0905800_-1	0.332763
AMRU_Ao_AAGGAGCCAAGGTTTC	AMRU	Ao	3160	PvP01_09_v1_685_-_PVP01_0905800_-1	0.0919287
AMRU_Ao_AAGGAGCTCCCAAGAT	AMRU	Ao	4056	PvP01_09_v1_685_-_PVP01_0905800_-1	0
AMRU_Ao_AAGGCAGAGTGCCATT	AMRU	Ao	6038	PvP01_09_v1_685_-_PVP01_0905800_-1	0.66072
AMRU_Ao_AAGGCAGGTCCGAACC	AMRU	Ao	8723	PvP01_09_v1_685_-_PVP01_0905800_-1	0
AMRU_Ao_AAGGCAGGTCCGAAGA	AMRU	Ao	2786	PvP01_09_v1_685_-_PVP01_0905800_-1	0.189344
AMRU_Ao_AAGGTTCAGAAACCTA	AMRU	Ao	5908	PvP01_09_v1_685_-_PVP01_0905800_-1	1.09423
AMRU_Ao_AAGGTTCAGCACACAG	AMRU	Ao	3785	PvP01_09_v1_685_-_PVP01_0905800_-1	0.262927
AMRU_Ao_AAGGTTCGTCACACGC	AMRU	Ao	6994	PvP01_09_v1_685_-_PVP01_0905800_-1	0
AMRU_Ao_AAGGTTCTCAGTCAGT	AMRU	Ao	5059	PvP01_09_v1_685_-_PVP01_0905800_-1	0.433407
AMRU_Ao_AAGGTTCTCCGAAGAG	AMRU	Ao	4416	PvP01_09_v1_685_-_PVP01_0905800_-1	0.143706
AMRU_Ao_AAGGTTCTCGACCAGC	AMRU	Ao	3992	PvP01_09_v1_685_-_PVP01_0905800_-1	0.188564
AMRU_Ao_AAGTCTGAGACTGGGT	AMRU	Ao	4837	PvP01_09_v1_685_-_PVP01_0905800_-1	0.369631
AMRU_Ao_AAGTCTGGTCAATGTC	AMRU	Ao	3168	PvP01_09_v1_685_-_PVP01_0905800_-1	0.309502
AMRU_Ao_AAGTCTGTCGCGTTTC	AMRU	Ao	4340	PvP01_09_v1_685_-_PVP01_0905800_-1	0.288018
AMRU_Ao_AAGTCTGTCGTTGCCT	AMRU	Ao	2531	PvP01_09_v1_685_-_PVP01_0905800_-1	0.0835911
AMRU_Ao_AAGTCTGTCTACTCAT	AMRU	Ao	8501	PvP01_09_v1_685_-_PVP01_0905800_-1	0.0609385
AMRU_Ao_AATCCAGAGGGTTCCC	AMRU	Ao	7687	PvP01_09_v1_685_-_PVP01_0905800_-1	0.0714847
AMRU_Ao_AATCCAGAGTAGCCGA	AMRU	Ao	3573	PvP01_09_v1_685_-_PVP01_0905800_-1	0.167645
AMRU_Ao_AATCCAGGTTACTGAC	AMRU	Ao	4799	PvP01_09_v1_685_-_PVP01_0905800_-1	0.216345
AMRU_Ao_AATCCAGTCAACCAAC	AMRU	Ao	5033	PvP01_09_v1_685_-_PVP01_0905800_-1	0.24623
AMRU_Ao_AATCCAGTCAATCACG	AMRU	Ao	8666	PvP01_09_v1_685_-_PVP01_0905800_-1	0.0454938
AMRU_Ao_AATCGGTGTACCCAAT	AMRU	Ao	3617	PvP01_09_v1_685_-_PVP01_0905800_-1	0
AMRU_Ao_ACACCAACAGCGAACA	AMRU	Ao	5038	PvP01_09_v1_685_-_PVP01_0905800_-1	0.700182
AMRU_Ao_ACACCAATCACTTCAT	AMRU	Ao	6962	PvP01_09_v1_685_-_PVP01_0905800_-1	0.133351
AMRU_Ao_ACACCAATCATATCGG	AMRU	Ao	4277	PvP01_09_v1_685_-_PVP01_0905800_-1	0.215668
AMRU_Ao_ACACCGGAGTGTCCCG	AMRU	Ao	4005	PvP01_09_v1_685_-_PVP01_0905800_-1	1.12398
AMRU_Ao_ACACCGGCACGAGGTA	AMRU	Ao	4223	PvP01_09_v1_685_-_PVP01_0905800_-1	0.0398915
AMRU_Ao_ACACCGGTCCGCAGTG	AMRU	Ao	45	PvP01_09_v1_685_-_PVP01_0905800_-1	0
AMRU_Ao_ACACTGACACCACGTG	AMRU	Ao	6267	PvP01_09_v1_685_-_PVP01_0905800_-1	0.396118
AMRU_Ao_ACACTGAGTGGTACAG	AMRU	Ao	4819	PvP01_09_v1_685_-_PVP01_0905800_-1	0.503363
AMRU_Ao_ACACTGATCCGAACGC	AMRU	Ao	4980	PvP01_09_v1_685_-_PVP01_0905800_-1	0.605113
AMRU_Ao_ACACTGATCGCTAGCG	AMRU	Ao	4434	PvP01_09_v1_685_-_PVP01_0905800_-1	0.99366
AMRU_Ao_ACACTGATCTGTGCAA	AMRU	Ao	8721	PvP01_09_v1_685_-_PVP01_0905800_-1	0.0856238
AMRU_Ao_ACAGCCGAGCCAGAAC	AMRU	Ao	4591	PvP01_09_v1_685_-_PVP01_0905800_-1	0.425568
AMRU_Ao_ACAGCCGCAATGGATA	AMRU	Ao	6858	PvP01_09_v1_685_-_PVP01_0905800_-1	0.098868
AMRU_Ao_ACAGCCGCACCAGGTC	AMRU	Ao	3316	PvP01_09_v1_685_-_PVP01_0905800_-1	0.43915
AMRU_Ao_ACAGCCGGTTCAGTAC	AMRU	Ao	9161	PvP01_09_v1_685_-_PVP01_0905800_-1	0
AMRU_Ao_ACAGCTAAGCTGCCCA	AMRU	Ao	367	PvP01_09_v1_685_-_PVP01_0905800_-1	0
AMRU_Ao_ACAGCTACACCACGTG	AMRU	Ao	1498	PvP01_09_v1_685_-_PVP01_0905800_-1	0
AMRU_Ao_ACATACGCACGCTTTC	AMRU	Ao	5135	PvP01_09_v1_685_-_PVP01_0905800_-1	1.57329
AMRU_Ao_ACATACGTCATCGGAT	AMRU	Ao	2436	PvP01_09_v1_685_-_PVP01_0905800_-1	0.150705
AMRU_Ao_ACATCAGAGAGTCTGG	AMRU	Ao	8748	PvP01_09_v1_685_-_PVP01_0905800_-1	0
AMRU_Ao_ACATCAGGTCGACTAT	AMRU	Ao	8810	PvP01_09_v1_685_-_PVP01_0905800_-1	0.0535776
AMRU_Ao_ACATCAGTCCATGAAC	AMRU	Ao	4214	PvP01_09_v1_685_-_PVP01_0905800_-1	0.190858
AMRU_Ao_ACATCAGTCTACTTAC	AMRU	Ao	4430	PvP01_09_v1_685_-_PVP01_0905800_-1	0.7503
AMRU_Ao_ACATGGTAGTACATGA	AMRU	Ao	312	PvP01_09_v1_685_-_PVP01_0905800_-1	0
AMRU_Ao_ACATGGTCAACACGCC	AMRU	Ao	7011	PvP01_09_v1_685_-_PVP01_0905800_-1	0
AMRU_Ao_ACATGGTGTAGCGCAA	AMRU	Ao	8300	PvP01_09_v1_685_-_PVP01_0905800_-1	0.0325383
AMRU_Ao_ACATGGTTCCAATGGT	AMRU	Ao	26	PvP01_09_v1_685_-_PVP01_0905800_-1	0.0917431
AMRU_Ao_ACCAGTACAGCTGTTA	AMRU	Ao	4500	PvP01_09_v1_685_-_PVP01_0905800_-1	0.177567
AMRU_Ao_ACCAGTATCACATACG	AMRU	Ao	1359	PvP01_09_v1_685_-_PVP01_0905800_-1	0
AMRU_Ao_ACCCACTCACCGATAT	AMRU	Ao	8105	PvP01_09_v1_685_-_PVP01_0905800_-1	0.0885995
AMRU_Ao_ACCCACTTCAAACCAC	AMRU	Ao	8782	PvP01_09_v1_685_-_PVP01_0905800_-1	0.298501
AMRU_Ao_ACCCACTTCAACACGT	AMRU	Ao	2740	PvP01_09_v1_685_-_PVP01_0905800_-1	0.338677
AMRU_Ao_ACCCACTTCTTAACCT	AMRU	Ao	8752	PvP01_09_v1_685_-_PVP01_0905800_-1	0.048796
AMRU_Ao_ACCGTAAAGGCTCTTA	AMRU	Ao	8663	PvP01_09_v1_685_-_PVP01_0905800_-1	0.127291
AMRU_Ao_ACCGTAACAGTGGAGT	AMRU	Ao	3484	PvP01_09_v1_685_-_PVP01_0905800_-1	0.794534
AMRU_Ao_ACCGTAAGTGTATGGG	AMRU	Ao	4930	PvP01_09_v1_685_-_PVP01_0905800_-1	0.808229
AMRU_Ao_ACCTTTAAGGACAGCT	AMRU	Ao	4372	PvP01_09_v1_685_-_PVP01_0905800_-1	0.253241
AMRU_Ao_ACCTTTAGTCTTCAAG	AMRU	Ao	222	PvP01_09_v1_685_-_PVP01_0905800_-1	0
AMRU_Ao_ACCTTTATCCACGTTC	AMRU	Ao	8851	PvP01_09_v1_685_-_PVP01_0905800_-1	0.0653196
AMRU_Ao_ACGAGCCAGATGTCGG	AMRU	Ao	3669	PvP01_09_v1_685_-_PVP01_0905800_-1	0.313087
AMRU_Ao_ACGAGCCTCGCAAACT	AMRU	Ao	8978	PvP01_09_v1_685_-_PVP01_0905800_-1	0.25208
AMRU_Ao_ACGAGGAAGTAAGTAC	AMRU	Ao	1696	PvP01_09_v1_685_-_PVP01_0905800_-1	0.211715
AMRU_Ao_ACGAGGACAAACTGCT	AMRU	Ao	5436	PvP01_09_v1_685_-_PVP01_0905800_-1	0.322601
AMRU_Ao_ACGAGGAGTGTGAATA	AMRU	Ao	8567	PvP01_09_v1_685_-_PVP01_0905800_-1	0.247237
AMRU_Ao_ACGATACAGCCGATTT	AMRU	Ao	4730	PvP01_09_v1_685_-_PVP01_0905800_-1	0.251942
AMRU_Ao_ACGATACCACAGCCCA	AMRU	Ao	2675	PvP01_09_v1_685_-_PVP01_0905800_-1	0.240848
AMRU_Ao_ACGATACCACGGTGTC	AMRU	Ao	5499	PvP01_09_v1_685_-_PVP01_0905800_-1	0.229032
AMRU_Ao_ACGATACGTAGGGTAC	AMRU	Ao	4854	PvP01_09_v1_685_-_PVP01_0905800_-1	0.192308
AMRU_Ao_ACGATACGTTACGCGC	AMRU	Ao	2438	PvP01_09_v1_685_-_PVP01_0905800_-1	0.753938
AMRU_Ao_ACGATGTGTGTTTGGT	AMRU	Ao	4644	PvP01_09_v1_685_-_PVP01_0905800_-1	1.22316
AMRU_Ao_ACGCAGCCAAGGCTCC	AMRU	Ao	175	PvP01_09_v1_685_-_PVP01_0905800_-1	0.0686813
AMRU_Ao_ACGCAGCCACGGACAA	AMRU	Ao	3871	PvP01_09_v1_685_-_PVP01_0905800_-1	0.200776
AMRU_Ao_ACGCCAGCAGTTAACC	AMRU	Ao	814	PvP01_09_v1_685_-_PVP01_0905800_-1	0
AMRU_Ao_ACGCCAGGTTCGTGAT	AMRU	Ao	2792	PvP01_09_v1_685_-_PVP01_0905800_-1	0
AMRU_Ao_ACGCCAGTCAACCATG	AMRU	Ao	1226	PvP01_09_v1_685_-_PVP01_0905800_-1	0.190585
AMRU_Ao_ACGCCGAAGAAACCGC	AMRU	Ao	5108	PvP01_09_v1_685_-_PVP01_0905800_-1	0.557103
AMRU_Ao_ACGCCGAAGTGGGATC	AMRU	Ao	3366	PvP01_09_v1_685_-_PVP01_0905800_-1	0.210704
AMRU_Ao_ACGCCGATCATGCATG	AMRU	Ao	8779	PvP01_09_v1_685_-_PVP01_0905800_-1	0.0764599
AMRU_Ao_ACGGAGAAGCAGACTG	AMRU	Ao	8769	PvP01_09_v1_685_-_PVP01_0905800_-1	0.0523149
AMRU_Ao_ACGGAGAGTCTCATCC	AMRU	Ao	2256	PvP01_09_v1_685_-_PVP01_0905800_-1	0
AMRU_Ao_ACGGAGAGTGGTCCGT	AMRU	Ao	463	PvP01_09_v1_685_-_PVP01_0905800_-1	0
AMRU_Ao_ACGGAGAGTTCGAATC	AMRU	Ao	4091	PvP01_09_v1_685_-_PVP01_0905800_-1	0.196889
AMRU_Ao_ACGGAGATCAGTTCGA	AMRU	Ao	4487	PvP01_09_v1_685_-_PVP01_0905800_-1	0.0820816
AMRU_Ao_ACGGAGATCCGCAAGC	AMRU	Ao	3827	PvP01_09_v1_685_-_PVP01_0905800_-1	0.740695
AMRU_Ao_ACGGAGATCTCTGCTG	AMRU	Ao	4141	PvP01_09_v1_685_-_PVP01_0905800_-1	0.206462
AMRU_Ao_ACGGCCAAGATCCCAT	AMRU	Ao	4298	PvP01_09_v1_685_-_PVP01_0905800_-1	0.486677
AMRU_Ao_ACGGCCACAAAGGCGT	AMRU	Ao	8703	PvP01_09_v1_685_-_PVP01_0905800_-1	0.0990344
AMRU_Ao_ACGGCCACATCCGTGG	AMRU	Ao	5629	PvP01_09_v1_685_-_PVP01_0905800_-1	0.371661
AMRU_Ao_ACGGCCACATGGTAGG	AMRU	Ao	6339	PvP01_09_v1_685_-_PVP01_0905800_-1	0.446678
AMRU_Ao_ACGGCCAGTGAGCGAT	AMRU	Ao	3304	PvP01_09_v1_685_-_PVP01_0905800_-1	0
AMRU_Ao_ACGGCCATCGGCGGTT	AMRU	Ao	5400	PvP01_09_v1_685_-_PVP01_0905800_-1	0.834121
AMRU_Ao_ACGGGCTAGACTAGAT	AMRU	Ao	4161	PvP01_09_v1_685_-_PVP01_0905800_-1	0.358081
AMRU_Ao_ACGGGCTAGCTAACAA	AMRU	Ao	5215	PvP01_09_v1_685_-_PVP01_0905800_-1	2.22402
AMRU_Ao_ACGGGCTAGTCTTGCA	AMRU	Ao	4956	PvP01_09_v1_685_-_PVP01_0905800_-1	0.44607
AMRU_Ao_ACGGGCTCACCGATAT	AMRU	Ao	1852	PvP01_09_v1_685_-_PVP01_0905800_-1	0.0762747
AMRU_Ao_ACGGGCTGTATTCGTG	AMRU	Ao	3434	PvP01_09_v1_685_-_PVP01_0905800_-1	0.247036
AMRU_Ao_ACGGGCTTCATGTGGT	AMRU	Ao	3771	PvP01_09_v1_685_-_PVP01_0905800_-1	0.104259
AMRU_Ao_ACGGGTCAGGTGATAT	AMRU	Ao	5352	PvP01_09_v1_685_-_PVP01_0905800_-1	0.170155
AMRU_Ao_ACGGGTCCACGTAAGG	AMRU	Ao	3029	PvP01_09_v1_685_-_PVP01_0905800_-1	0.115902
AMRU_Ao_ACGGGTCTCGGAATCT	AMRU	Ao	4795	PvP01_09_v1_685_-_PVP01_0905800_-1	1.37191
AMRU_Ao_ACGTCAAAGACTTTCG	AMRU	Ao	4575	PvP01_09_v1_685_-_PVP01_0905800_-1	0.515826
AMRU_Ao_ACGTCAAAGCACCGTC	AMRU	Ao	8342	PvP01_09_v1_685_-_PVP01_0905800_-1	0.147362
AMRU_Ao_ACGTCAAAGCTGCCCA	AMRU	Ao	4197	PvP01_09_v1_685_-_PVP01_0905800_-1	0.145212
AMRU_Ao_ACGTCAACATGTTCCC	AMRU	Ao	1562	PvP01_09_v1_685_-_PVP01_0905800_-1	0.142837
AMRU_Ao_ACTATCTGTGCACTTA	AMRU	Ao	4731	PvP01_09_v1_685_-_PVP01_0905800_-1	0.0604631
AMRU_Ao_ACTATCTTCCGTAGTA	AMRU	Ao	2267	PvP01_09_v1_685_-_PVP01_0905800_-1	0
AMRU_Ao_ACTGAACCAATAGAGT	AMRU	Ao	2016	PvP01_09_v1_685_-_PVP01_0905800_-1	0.201654
AMRU_Ao_ACTGAACGTACTCAAC	AMRU	Ao	3689	PvP01_09_v1_685_-_PVP01_0905800_-1	0.40024
AMRU_Ao_ACTGAGTAGAGCAATT	AMRU	Ao	7695	PvP01_09_v1_685_-_PVP01_0905800_-1	0.0798308
AMRU_Ao_ACTGAGTAGATATACG	AMRU	Ao	3555	PvP01_09_v1_685_-_PVP01_0905800_-1	0.049682
AMRU_Ao_ACTGAGTAGCAAATCA	AMRU	Ao	4319	PvP01_09_v1_685_-_PVP01_0905800_-1	0.323939
AMRU_Ao_ACTGAGTCAAAGGCGT	AMRU	Ao	6008	PvP01_09_v1_685_-_PVP01_0905800_-1	1.21149
AMRU_Ao_ACTGCTCAGACGACGT	AMRU	Ao	2335	PvP01_09_v1_685_-_PVP01_0905800_-1	0.207245
AMRU_Ao_ACTGCTCCAGGATCGA	AMRU	Ao	3547	PvP01_09_v1_685_-_PVP01_0905800_-1	0
AMRU_Ao_ACTGCTCCAGTCTTCC	AMRU	Ao	391	PvP01_09_v1_685_-_PVP01_0905800_-1	0
AMRU_Ao_ACTGTCCAGCTGGAAC	AMRU	Ao	1449	PvP01_09_v1_685_-_PVP01_0905800_-1	0
AMRU_Ao_ACTGTCCCACGTGAGA	AMRU	Ao	8200	PvP01_09_v1_685_-_PVP01_0905800_-1	0
AMRU_Ao_ACTGTCCCATTCGACA	AMRU	Ao	4293	PvP01_09_v1_685_-_PVP01_0905800_-1	0
AMRU_Ao_ACTGTCCTCCTACAGA	AMRU	Ao	8835	PvP01_09_v1_685_-_PVP01_0905800_-1	0.0450653
AMRU_Ao_ACTGTCCTCCTGCTTG	AMRU	Ao	5900	PvP01_09_v1_685_-_PVP01_0905800_-1	0.903926
AMRU_Ao_ACTGTCCTCGCCAAAT	AMRU	Ao	3510	PvP01_09_v1_685_-_PVP01_0905800_-1	0.25992
AMRU_Ao_ACTTACTAGAAGAAGC	AMRU	Ao	8354	PvP01_09_v1_685_-_PVP01_0905800_-1	0.0497884
AMRU_Ao_ACTTACTCAGATCCAT	AMRU	Ao	1812	PvP01_09_v1_685_-_PVP01_0905800_-1	0.0577367
AMRU_Ao_ACTTACTCATGAACCT	AMRU	Ao	6192	PvP01_09_v1_685_-_PVP01_0905800_-1	0.667359
AMRU_Ao_ACTTACTGTCCCTTGT	AMRU	Ao	51	PvP01_09_v1_685_-_PVP01_0905800_-1	0
AMRU_Ao_ACTTGTTAGTTTGCGT	AMRU	Ao	3071	PvP01_09_v1_685_-_PVP01_0905800_-1	0.141864
AMRU_Ao_ACTTGTTGTGCAGTAG	AMRU	Ao	7782	PvP01_09_v1_685_-_PVP01_0905800_-1	0.236855
AMRU_Ao_ACTTGTTTCACCATAG	AMRU	Ao	2467	PvP01_09_v1_685_-_PVP01_0905800_-1	0.0600204
AMRU_Ao_ACTTGTTTCCTAGAAC	AMRU	Ao	2953	PvP01_09_v1_685_-_PVP01_0905800_-1	0.32845
AMRU_Ao_ACTTTCAAGAAGGGTA	AMRU	Ao	5105	PvP01_09_v1_685_-_PVP01_0905800_-1	0.459067
AMRU_Ao_ACTTTCAAGCGCTCCA	AMRU	Ao	4343	PvP01_09_v1_685_-_PVP01_0905800_-1	0
AMRU_Ao_ACTTTCACATTACGAC	AMRU	Ao	3515	PvP01_09_v1_685_-_PVP01_0905800_-1	0.163684
AMRU_Ao_ACTTTCAGTAAATGAC	AMRU	Ao	8655	PvP01_09_v1_685_-_PVP01_0905800_-1	0.0490436
AMRU_Ao_ACTTTCAGTACATGTC	AMRU	Ao	2877	PvP01_09_v1_685_-_PVP01_0905800_-1	0
AMRU_Ao_AGAATAGAGGCCCTTG	AMRU	Ao	1715	PvP01_09_v1_685_-_PVP01_0905800_-1	0.246771
AMRU_Ao_AGAATAGAGGGATGGG	AMRU	Ao	4796	PvP01_09_v1_685_-_PVP01_0905800_-1	0.345713
AMRU_Ao_AGAATAGAGGGCATGT	AMRU	Ao	1013	PvP01_09_v1_685_-_PVP01_0905800_-1	0
AMRU_Ao_AGACGTTGTCACACGC	AMRU	Ao	7255	PvP01_09_v1_685_-_PVP01_0905800_-1	0
AMRU_Ao_AGACGTTTCGGTGTCG	AMRU	Ao	5564	PvP01_09_v1_685_-_PVP01_0905800_-1	1.2842
AMRU_Ao_AGAGCGAAGAGAACAG	AMRU	Ao	1271	PvP01_09_v1_685_-_PVP01_0905800_-1	0
AMRU_Ao_AGAGCGAAGCGTGTCC	AMRU	Ao	9160	PvP01_09_v1_685_-_PVP01_0905800_-1	0
AMRU_Ao_AGAGCGACATGCTAGT	AMRU	Ao	4524	PvP01_09_v1_685_-_PVP01_0905800_-1	0.32113
AMRU_Ao_AGAGCGAGTTCCACGG	AMRU	Ao	5189	PvP01_09_v1_685_-_PVP01_0905800_-1	0.430326
AMRU_Ao_AGAGCGATCGCCTGTT	AMRU	Ao	2007	PvP01_09_v1_685_-_PVP01_0905800_-1	0
AMRU_Ao_AGAGCTTAGTGAAGAG	AMRU	Ao	6506	PvP01_09_v1_685_-_PVP01_0905800_-1	0.295125
AMRU_Ao_AGAGCTTCACCATGTA	AMRU	Ao	7950	PvP01_09_v1_685_-_PVP01_0905800_-1	0.276345
AMRU_Ao_AGAGCTTCATCTCCCA	AMRU	Ao	2670	PvP01_09_v1_685_-_PVP01_0905800_-1	0.199309
AMRU_Ao_AGAGCTTTCATCGCTC	AMRU	Ao	3994	PvP01_09_v1_685_-_PVP01_0905800_-1	0.0831393
AMRU_Ao_AGAGTGGCAAGCGTAG	AMRU	Ao	4578	PvP01_09_v1_685_-_PVP01_0905800_-1	0.474094
AMRU_Ao_AGAGTGGCACAGGTTT	AMRU	Ao	5224	PvP01_09_v1_685_-_PVP01_0905800_-1	0.572082
AMRU_Ao_AGAGTGGCAGCCTGTG	AMRU	Ao	4890	PvP01_09_v1_685_-_PVP01_0905800_-1	0.545355
AMRU_Ao_AGAGTGGGTATAGGTA	AMRU	Ao	4347	PvP01_09_v1_685_-_PVP01_0905800_-1	0.425949
AMRU_Ao_AGAGTGGGTCCAGTGC	AMRU	Ao	7573	PvP01_09_v1_685_-_PVP01_0905800_-1	0
AMRU_Ao_AGAGTGGTCACAAACC	AMRU	Ao	3842	PvP01_09_v1_685_-_PVP01_0905800_-1	0.682734
AMRU_Ao_AGAGTGGTCACTTACT	AMRU	Ao	5632	PvP01_09_v1_685_-_PVP01_0905800_-1	0.288122
AMRU_Ao_AGAGTGGTCGTACCGG	AMRU	Ao	6171	PvP01_09_v1_685_-_PVP01_0905800_-1	0.426191
AMRU_Ao_AGATCTGAGACTGGGT	AMRU	Ao	8972	PvP01_09_v1_685_-_PVP01_0905800_-1	0.192167
AMRU_Ao_AGATCTGAGCTAACTC	AMRU	Ao	4475	PvP01_09_v1_685_-_PVP01_0905800_-1	0.843133
AMRU_Ao_AGATCTGCATTAACCG	AMRU	Ao	5371	PvP01_09_v1_685_-_PVP01_0905800_-1	0.631029
AMRU_Ao_AGATCTGGTCGCGAAA	AMRU	Ao	47	PvP01_09_v1_685_-_PVP01_0905800_-1	0
AMRU_Ao_AGATTGCCAATGGACG	AMRU	Ao	9066	PvP01_09_v1_685_-_PVP01_0905800_-1	0.075466
AMRU_Ao_AGATTGCGTTTGCATG	AMRU	Ao	8052	PvP01_09_v1_685_-_PVP01_0905800_-1	0.0372363
AMRU_Ao_AGATTGCTCACCCGAG	AMRU	Ao	7933	PvP01_09_v1_685_-_PVP01_0905800_-1	0.202665
AMRU_Ao_AGATTGCTCACGGTTA	AMRU	Ao	8731	PvP01_09_v1_685_-_PVP01_0905800_-1	0.030512
AMRU_Ao_AGCAGCCGTCAGAAGC	AMRU	Ao	8113	PvP01_09_v1_685_-_PVP01_0905800_-1	0
AMRU_Ao_AGCAGCCGTGCAGGTA	AMRU	Ao	5335	PvP01_09_v1_685_-_PVP01_0905800_-1	0.658762
AMRU_Ao_AGCATACAGAATAGGG	AMRU	Ao	4668	PvP01_09_v1_685_-_PVP01_0905800_-1	0.166688
AMRU_Ao_AGCATACAGAGAGCTC	AMRU	Ao	1804	PvP01_09_v1_685_-_PVP01_0905800_-1	0.0484191
AMRU_Ao_AGCATACCATACGCCG	AMRU	Ao	4165	PvP01_09_v1_685_-_PVP01_0905800_-1	0.0674445
AMRU_Ao_AGCATACGTCGCGTGT	AMRU	Ao	1556	PvP01_09_v1_685_-_PVP01_0905800_-1	0.356474
AMRU_Ao_AGCATACGTGCAACGA	AMRU	Ao	7678	PvP01_09_v1_685_-_PVP01_0905800_-1	0.110217
AMRU_Ao_AGCATACTCTCCGGTT	AMRU	Ao	2134	PvP01_09_v1_685_-_PVP01_0905800_-1	0
AMRU_Ao_AGCCTAAAGCGTTGCC	AMRU	Ao	3343	PvP01_09_v1_685_-_PVP01_0905800_-1	0.309905
AMRU_Ao_AGCCTAACACGCGAAA	AMRU	Ao	3061	PvP01_09_v1_685_-_PVP01_0905800_-1	0.209096
AMRU_Ao_AGCCTAATCTTGACGA	AMRU	Ao	28	PvP01_09_v1_685_-_PVP01_0905800_-1	0
AMRU_Ao_AGCGGTCAGTTCGATC	AMRU	Ao	4907	PvP01_09_v1_685_-_PVP01_0905800_-1	0.203899
AMRU_Ao_AGCGGTCCACACATGT	AMRU	Ao	5940	PvP01_09_v1_685_-_PVP01_0905800_-1	1.24757
AMRU_Ao_AGCGGTCTCTGCGTAA	AMRU	Ao	8363	PvP01_09_v1_685_-_PVP01_0905800_-1	0.0384039
AMRU_Ao_AGCGTATAGTGTTTGC	AMRU	Ao	6254	PvP01_09_v1_685_-_PVP01_0905800_-1	0.70858
AMRU_Ao_AGCGTATGTACTTGAC	AMRU	Ao	4230	PvP01_09_v1_685_-_PVP01_0905800_-1	0.176991
AMRU_Ao_AGCGTATTCAGATAAG	AMRU	Ao	4362	PvP01_09_v1_685_-_PVP01_0905800_-1	0.102333
AMRU_Ao_AGCGTCGAGGGATCTG	AMRU	Ao	3757	PvP01_09_v1_685_-_PVP01_0905800_-1	0.402131
AMRU_Ao_AGCGTCGTCGTCACGG	AMRU	Ao	6270	PvP01_09_v1_685_-_PVP01_0905800_-1	1.08448
AMRU_Ao_AGCGTCGTCGTTTGCC	AMRU	Ao	4357	PvP01_09_v1_685_-_PVP01_0905800_-1	1.01916
AMRU_Ao_AGCTCCTAGATGCGAC	AMRU	Ao	4681	PvP01_09_v1_685_-_PVP01_0905800_-1	0.885897
AMRU_Ao_AGCTCCTAGGGTCGAT	AMRU	Ao	4815	PvP01_09_v1_685_-_PVP01_0905800_-1	0.14828
AMRU_Ao_AGCTCCTCAATGAAAC	AMRU	Ao	4830	PvP01_09_v1_685_-_PVP01_0905800_-1	0.40111
AMRU_Ao_AGCTCCTGTCTGGAGA	AMRU	Ao	5944	PvP01_09_v1_685_-_PVP01_0905800_-1	0.666735
AMRU_Ao_AGCTCCTGTTCCCTTG	AMRU	Ao	7717	PvP01_09_v1_685_-_PVP01_0905800_-1	0.358123
AMRU_Ao_AGCTCCTTCCAGAGGA	AMRU	Ao	5662	PvP01_09_v1_685_-_PVP01_0905800_-1	1.5358
AMRU_Ao_AGCTCCTTCGCCTGAG	AMRU	Ao	4672	PvP01_09_v1_685_-_PVP01_0905800_-1	1.23394
AMRU_Ao_AGCTCCTTCTTGCATT	AMRU	Ao	4068	PvP01_09_v1_685_-_PVP01_0905800_-1	0.0686342
AMRU_Ao_AGCTCTCCAGATCTGT	AMRU	Ao	5578	PvP01_09_v1_685_-_PVP01_0905800_-1	0.369072
AMRU_Ao_AGCTCTCGTTACGCGC	AMRU	Ao	4027	PvP01_09_v1_685_-_PVP01_0905800_-1	0.359554
AMRU_Ao_AGCTTGACAACACCCG	AMRU	Ao	3569	PvP01_09_v1_685_-_PVP01_0905800_-1	0.181826
AMRU_Ao_AGCTTGATCGAATGGG	AMRU	Ao	6497	PvP01_09_v1_685_-_PVP01_0905800_-1	0.405433
AMRU_Ao_AGGCCACAGCCCAACC	AMRU	Ao	4078	PvP01_09_v1_685_-_PVP01_0905800_-1	1.39137
AMRU_Ao_AGGCCACAGCTGCAAG	AMRU	Ao	2461	PvP01_09_v1_685_-_PVP01_0905800_-1	0.229503
AMRU_Ao_AGGCCACCACCCATTC	AMRU	Ao	3628	PvP01_09_v1_685_-_PVP01_0905800_-1	0.105569
AMRU_Ao_AGGCCGTAGCTCTCGG	AMRU	Ao	5864	PvP01_09_v1_685_-_PVP01_0905800_-1	0.964041
AMRU_Ao_AGGGAGTAGCTCCTCT	AMRU	Ao	5676	PvP01_09_v1_685_-_PVP01_0905800_-1	0.566893
AMRU_Ao_AGGGAGTCATAAAGGT	AMRU	Ao	2072	PvP01_09_v1_685_-_PVP01_0905800_-1	0.0745712
AMRU_Ao_AGGGAGTGTTTAAGCC	AMRU	Ao	8846	PvP01_09_v1_685_-_PVP01_0905800_-1	0.1445
AMRU_Ao_AGGGAGTTCTTACCTA	AMRU	Ao	3837	PvP01_09_v1_685_-_PVP01_0905800_-1	0
AMRU_Ao_AGGGATGAGAGGTTGC	AMRU	Ao	1697	PvP01_09_v1_685_-_PVP01_0905800_-1	0
AMRU_Ao_AGGGATGCAATCGGTT	AMRU	Ao	2446	PvP01_09_v1_685_-_PVP01_0905800_-1	0.18266
AMRU_Ao_AGGGATGCAGCGTCCA	AMRU	Ao	2434	PvP01_09_v1_685_-_PVP01_0905800_-1	0.159991
AMRU_Ao_AGGGATGCATCGATTG	AMRU	Ao	4406	PvP01_09_v1_685_-_PVP01_0905800_-1	0.639795
AMRU_Ao_AGGGATGTCTCTGAGA	AMRU	Ao	7624	PvP01_09_v1_685_-_PVP01_0905800_-1	0.0543774
AMRU_Ao_AGGGTGACACATTTCT	AMRU	Ao	4597	PvP01_09_v1_685_-_PVP01_0905800_-1	0.327368
AMRU_Ao_AGGGTGAGTTAGGGTG	AMRU	Ao	7968	PvP01_09_v1_685_-_PVP01_0905800_-1	0.116137
AMRU_Ao_AGGTCATAGATGAGAG	AMRU	Ao	6455	PvP01_09_v1_685_-_PVP01_0905800_-1	0.459999
AMRU_Ao_AGGTCATGTAAGAGAG	AMRU	Ao	8932	PvP01_09_v1_685_-_PVP01_0905800_-1	0.078456
AMRU_Ao_AGGTCCGCAATCTACG	AMRU	Ao	5705	PvP01_09_v1_685_-_PVP01_0905800_-1	0.592792
AMRU_Ao_AGGTCCGCATGGGAAC	AMRU	Ao	6356	PvP01_09_v1_685_-_PVP01_0905800_-1	0.793831
AMRU_Ao_AGGTCCGGTTTGTGTG	AMRU	Ao	8929	PvP01_09_v1_685_-_PVP01_0905800_-1	0.093668
AMRU_Ao_AGTAGTCCAGGCAGTA	AMRU	Ao	8624	PvP01_09_v1_685_-_PVP01_0905800_-1	0.132743
AMRU_Ao_AGTAGTCCAGTATAAG	AMRU	Ao	7935	PvP01_09_v1_685_-_PVP01_0905800_-1	0.0621427
AMRU_Ao_AGTAGTCGTGTATGGG	AMRU	Ao	4630	PvP01_09_v1_685_-_PVP01_0905800_-1	0.119911
AMRU_Ao_AGTAGTCTCACAGGCC	AMRU	Ao	4747	PvP01_09_v1_685_-_PVP01_0905800_-1	0.153392
AMRU_Ao_AGTCTTTAGAGTAAGG	AMRU	Ao	1975	PvP01_09_v1_685_-_PVP01_0905800_-1	0.363967
AMRU_Ao_AGTCTTTTCATTTGGG	AMRU	Ao	6705	PvP01_09_v1_685_-_PVP01_0905800_-1	0.172771
AMRU_Ao_AGTCTTTTCTATCCTA	AMRU	Ao	3043	PvP01_09_v1_685_-_PVP01_0905800_-1	0.128329
AMRU_Ao_AGTGAGGAGAAACCTA	AMRU	Ao	5759	PvP01_09_v1_685_-_PVP01_0905800_-1	0.716375
AMRU_Ao_AGTGAGGTCAGCTCGG	AMRU	Ao	2571	PvP01_09_v1_685_-_PVP01_0905800_-1	0.133565
AMRU_Ao_AGTGAGGTCATGTAGC	AMRU	Ao	8239	PvP01_09_v1_685_-_PVP01_0905800_-1	0
AMRU_Ao_AGTGGGAAGCTAAGAT	AMRU	Ao	2900	PvP01_09_v1_685_-_PVP01_0905800_-1	0.198347
AMRU_Ao_AGTGGGACAGTCAGCC	AMRU	Ao	3055	PvP01_09_v1_685_-_PVP01_0905800_-1	0
AMRU_Ao_AGTGGGAGTGCACCAC	AMRU	Ao	1107	PvP01_09_v1_685_-_PVP01_0905800_-1	0
AMRU_Ao_AGTGGGATCATTGCCC	AMRU	Ao	8754	PvP01_09_v1_685_-_PVP01_0905800_-1	0.0239309
AMRU_Ao_AGTGTCAAGGTCATCT	AMRU	Ao	4855	PvP01_09_v1_685_-_PVP01_0905800_-1	0.161943
AMRU_Ao_AGTGTCAGTACTTAGC	AMRU	Ao	4585	PvP01_09_v1_685_-_PVP01_0905800_-1	1.26466
AMRU_Ao_AGTGTCATCCTTGGTC	AMRU	Ao	7604	PvP01_09_v1_685_-_PVP01_0905800_-1	0.439899
AMRU_Ao_AGTTGGTAGAATTCCC	AMRU	Ao	3818	PvP01_09_v1_685_-_PVP01_0905800_-1	0.337838
AMRU_Ao_AGTTGGTAGATCCCAT	AMRU	Ao	3943	PvP01_09_v1_685_-_PVP01_0905800_-1	0.0524659
AMRU_Ao_AGTTGGTCAGAGTGTG	AMRU	Ao	2778	PvP01_09_v1_685_-_PVP01_0905800_-1	0.120788
AMRU_Ao_AGTTGGTCAGTTCATG	AMRU	Ao	2108	PvP01_09_v1_685_-_PVP01_0905800_-1	0.0430793
AMRU_Ao_AGTTGGTGTCCAGTGC	AMRU	Ao	3520	PvP01_09_v1_685_-_PVP01_0905800_-1	0.635001
AMRU_Ao_ATAACGCCAGGACCCT	AMRU	Ao	3438	PvP01_09_v1_685_-_PVP01_0905800_-1	0.112939
AMRU_Ao_ATAACGCCAGTATCTG	AMRU	Ao	6990	PvP01_09_v1_685_-_PVP01_0905800_-1	0
AMRU_Ao_ATAACGCGTTATGCGT	AMRU	Ao	8646	PvP01_09_v1_685_-_PVP01_0905800_-1	0.0506971
AMRU_Ao_ATAACGCTCAGCTGGC	AMRU	Ao	2207	PvP01_09_v1_685_-_PVP01_0905800_-1	0.1207
AMRU_Ao_ATAACGCTCCGCGCAA	AMRU	Ao	1336	PvP01_09_v1_685_-_PVP01_0905800_-1	0.0830082
AMRU_Ao_ATAACGCTCTGTCTAT	AMRU	Ao	6470	PvP01_09_v1_685_-_PVP01_0905800_-1	0.468252
AMRU_Ao_ATAAGAGAGATGCCTT	AMRU	Ao	8250	PvP01_09_v1_685_-_PVP01_0905800_-1	0.0815062
AMRU_Ao_ATAAGAGGTAGATTAG	AMRU	Ao	3485	PvP01_09_v1_685_-_PVP01_0905800_-1	0.530035
AMRU_Ao_ATAAGAGTCAATCACG	AMRU	Ao	4144	PvP01_09_v1_685_-_PVP01_0905800_-1	0.379543
AMRU_Ao_ATAGACCCATGGAATA	AMRU	Ao	2058	PvP01_09_v1_685_-_PVP01_0905800_-1	0.233345
AMRU_Ao_ATAGACCGTGCAACTT	AMRU	Ao	1345	PvP01_09_v1_685_-_PVP01_0905800_-1	0
AMRU_Ao_ATAGACCGTTAAGAAC	AMRU	Ao	1155	PvP01_09_v1_685_-_PVP01_0905800_-1	0.0657851
AMRU_Ao_ATCACGAAGATAGGAG	AMRU	Ao	4054	PvP01_09_v1_685_-_PVP01_0905800_-1	0.601142
AMRU_Ao_ATCACGATCTACTTAC	AMRU	Ao	3284	PvP01_09_v1_685_-_PVP01_0905800_-1	0.260326
AMRU_Ao_ATCATCTAGAGCTATA	AMRU	Ao	692	PvP01_09_v1_685_-_PVP01_0905800_-1	0
AMRU_Ao_ATCATCTCACATTTCT	AMRU	Ao	6619	PvP01_09_v1_685_-_PVP01_0905800_-1	0.190024
AMRU_Ao_ATCATCTCAGGGATTG	AMRU	Ao	5836	PvP01_09_v1_685_-_PVP01_0905800_-1	0.847506
AMRU_Ao_ATCATCTTCGTCACGG	AMRU	Ao	2111	PvP01_09_v1_685_-_PVP01_0905800_-1	0.164867
AMRU_Ao_ATCATGGCAATGGAGC	AMRU	Ao	8397	PvP01_09_v1_685_-_PVP01_0905800_-1	0.195014
AMRU_Ao_ATCATGGGTGACGGTA	AMRU	Ao	4246	PvP01_09_v1_685_-_PVP01_0905800_-1	0.595238
AMRU_Ao_ATCATGGGTGCATCTA	AMRU	Ao	8073	PvP01_09_v1_685_-_PVP01_0905800_-1	0.112793
AMRU_Ao_ATCCACCAGTCTCCTC	AMRU	Ao	8336	PvP01_09_v1_685_-_PVP01_0905800_-1	0.232707
AMRU_Ao_ATCCACCTCGGCTACG	AMRU	Ao	4738	PvP01_09_v1_685_-_PVP01_0905800_-1	0.542326
AMRU_Ao_ATCCACCTCTTAGCCC	AMRU	Ao	4039	PvP01_09_v1_685_-_PVP01_0905800_-1	0.38451
AMRU_Ao_ATCCGAAAGCACACAG	AMRU	Ao	4447	PvP01_09_v1_685_-_PVP01_0905800_-1	0.817105
AMRU_Ao_ATCCGAACACTGAAGG	AMRU	Ao	8425	PvP01_09_v1_685_-_PVP01_0905800_-1	0.132424
AMRU_Ao_ATCCGAACATGCCTTC	AMRU	Ao	5582	PvP01_09_v1_685_-_PVP01_0905800_-1	0.735784
AMRU_Ao_ATCCGAATCCCAACGG	AMRU	Ao	7830	PvP01_09_v1_685_-_PVP01_0905800_-1	0.0670376
AMRU_Ao_ATCCGAATCCTCCTAG	AMRU	Ao	4752	PvP01_09_v1_685_-_PVP01_0905800_-1	0.541162
AMRU_Ao_ATCCGAATCTACCAGA	AMRU	Ao	8832	PvP01_09_v1_685_-_PVP01_0905800_-1	0.289314
AMRU_Ao_ATCCGAATCTGTCCGT	AMRU	Ao	6206	PvP01_09_v1_685_-_PVP01_0905800_-1	1.17919
AMRU_Ao_ATCGAGTAGCTAGCCC	AMRU	Ao	3821	PvP01_09_v1_685_-_PVP01_0905800_-1	0.39799
AMRU_Ao_ATCGAGTCATCTGGTA	AMRU	Ao	7157	PvP01_09_v1_685_-_PVP01_0905800_-1	0
AMRU_Ao_ATCGAGTGTGAAATCA	AMRU	Ao	5784	PvP01_09_v1_685_-_PVP01_0905800_-1	2.02188
AMRU_Ao_ATCGAGTGTTTGTGTG	AMRU	Ao	8217	PvP01_09_v1_685_-_PVP01_0905800_-1	0.0919287
AMRU_Ao_ATCGAGTTCAACACCA	AMRU	Ao	8453	PvP01_09_v1_685_-_PVP01_0905800_-1	0.0299061
AMRU_Ao_ATCTACTAGGCCGAAT	AMRU	Ao	1467	PvP01_09_v1_685_-_PVP01_0905800_-1	0
AMRU_Ao_ATCTACTCAATCCGAT	AMRU	Ao	8733	PvP01_09_v1_685_-_PVP01_0905800_-1	0.0941686
AMRU_Ao_ATCTACTCAGGTGGAT	AMRU	Ao	8495	PvP01_09_v1_685_-_PVP01_0905800_-1	0.0214555
AMRU_Ao_ATCTACTGTAAACACA	AMRU	Ao	1164	PvP01_09_v1_685_-_PVP01_0905800_-1	0.329164
AMRU_Ao_ATCTACTGTACCGGCT	AMRU	Ao	3989	PvP01_09_v1_685_-_PVP01_0905800_-1	0.153878
AMRU_Ao_ATCTACTGTCTAGCCG	AMRU	Ao	2310	PvP01_09_v1_685_-_PVP01_0905800_-1	0
AMRU_Ao_ATCTACTTCGCATGGC	AMRU	Ao	1472	PvP01_09_v1_685_-_PVP01_0905800_-1	0.0903342
AMRU_Ao_ATCTGCCAGACCGGAT	AMRU	Ao	6828	PvP01_09_v1_685_-_PVP01_0905800_-1	0.252483
AMRU_Ao_ATCTGCCAGCGAGAAA	AMRU	Ao	5140	PvP01_09_v1_685_-_PVP01_0905800_-1	0.256641
AMRU_Ao_ATCTGCCGTGATGTCT	AMRU	Ao	611	PvP01_09_v1_685_-_PVP01_0905800_-1	0
AMRU_Ao_ATGAGGGAGGATGGAA	AMRU	Ao	8875	PvP01_09_v1_685_-_PVP01_0905800_-1	0.156912
AMRU_Ao_ATGAGGGCATATGGTC	AMRU	Ao	1068	PvP01_09_v1_685_-_PVP01_0905800_-1	0.0911826
AMRU_Ao_ATGAGGGGTGAGGGAG	AMRU	Ao	5101	PvP01_09_v1_685_-_PVP01_0905800_-1	0.310229
AMRU_Ao_ATGAGGGGTGTGGTTT	AMRU	Ao	4761	PvP01_09_v1_685_-_PVP01_0905800_-1	0.0927128
AMRU_Ao_ATGAGGGTCCAGAGGA	AMRU	Ao	8297	PvP01_09_v1_685_-_PVP01_0905800_-1	0.38863
AMRU_Ao_ATGCGATAGTACGCGA	AMRU	Ao	3671	PvP01_09_v1_685_-_PVP01_0905800_-1	0.183959
AMRU_Ao_ATGCGATGTAGCAAAT	AMRU	Ao	3535	PvP01_09_v1_685_-_PVP01_0905800_-1	0.0920387
AMRU_Ao_ATGGGAGAGCACCGTC	AMRU	Ao	5006	PvP01_09_v1_685_-_PVP01_0905800_-1	0.511378
AMRU_Ao_ATGGGAGCACGCTTTC	AMRU	Ao	3876	PvP01_09_v1_685_-_PVP01_0905800_-1	0.168879
AMRU_Ao_ATGGGAGCATACAGCT	AMRU	Ao	4562	PvP01_09_v1_685_-_PVP01_0905800_-1	0.0364431
AMRU_Ao_ATGGGAGTCCACGCAG	AMRU	Ao	3944	PvP01_09_v1_685_-_PVP01_0905800_-1	0.411749
AMRU_Ao_ATGTGTGAGGGCTCTC	AMRU	Ao	2949	PvP01_09_v1_685_-_PVP01_0905800_-1	0.536673
AMRU_Ao_ATGTGTGCAAGAAAGG	AMRU	Ao	5422	PvP01_09_v1_685_-_PVP01_0905800_-1	0.343132
AMRU_Ao_ATGTGTGCACCAGCAC	AMRU	Ao	5713	PvP01_09_v1_685_-_PVP01_0905800_-1	2.08011
AMRU_Ao_ATTATCCAGGATGTAT	AMRU	Ao	2148	PvP01_09_v1_685_-_PVP01_0905800_-1	0
AMRU_Ao_ATTATCCAGTGCCAGA	AMRU	Ao	8207	PvP01_09_v1_685_-_PVP01_0905800_-1	0.0480008
AMRU_Ao_ATTATCCCATCACAAC	AMRU	Ao	4257	PvP01_09_v1_685_-_PVP01_0905800_-1	0.196338
AMRU_Ao_ATTATCCTCACGCGGT	AMRU	Ao	4558	PvP01_09_v1_685_-_PVP01_0905800_-1	0.752445
AMRU_Ao_ATTCTACCAACGATGG	AMRU	Ao	5791	PvP01_09_v1_685_-_PVP01_0905800_-1	0.294464
AMRU_Ao_ATTCTACCATGTTCCC	AMRU	Ao	3768	PvP01_09_v1_685_-_PVP01_0905800_-1	0.206303
AMRU_Ao_ATTCTACGTTCCACAA	AMRU	Ao	8739	PvP01_09_v1_685_-_PVP01_0905800_-1	0.118733
AMRU_Ao_ATTCTACTCGTTGCCT	AMRU	Ao	3967	PvP01_09_v1_685_-_PVP01_0905800_-1	0.580533
AMRU_Ao_ATTGGACAGACACTAA	AMRU	Ao	3381	PvP01_09_v1_685_-_PVP01_0905800_-1	0.313362
AMRU_Ao_ATTGGACAGGAATTAC	AMRU	Ao	1586	PvP01_09_v1_685_-_PVP01_0905800_-1	0
AMRU_Ao_ATTGGACGTCCTCTTG	AMRU	Ao	4776	PvP01_09_v1_685_-_PVP01_0905800_-1	0.414909
AMRU_Ao_ATTGGACTCTGCTGCT	AMRU	Ao	2932	PvP01_09_v1_685_-_PVP01_0905800_-1	0.118297
AMRU_Ao_ATTGGACTCTTCGAGA	AMRU	Ao	6015	PvP01_09_v1_685_-_PVP01_0905800_-1	1.96984
AMRU_Ao_ATTGGACTCTTGTTTG	AMRU	Ao	3794	PvP01_09_v1_685_-_PVP01_0905800_-1	0.0468121
AMRU_Ao_ATTGGTGCACGGATAG	AMRU	Ao	6664	PvP01_09_v1_685_-_PVP01_0905800_-1	0.34256
AMRU_Ao_ATTGGTGCAGACAAGC	AMRU	Ao	4926	PvP01_09_v1_685_-_PVP01_0905800_-1	0.883095
AMRU_Ao_ATTGGTGGTCTAAACC	AMRU	Ao	2542	PvP01_09_v1_685_-_PVP01_0905800_-1	0.126604
AMRU_Ao_ATTGGTGGTTTAGCTG	AMRU	Ao	3783	PvP01_09_v1_685_-_PVP01_0905800_-1	0.116582
AMRU_Ao_ATTTCTGCACTACAGT	AMRU	Ao	3525	PvP01_09_v1_685_-_PVP01_0905800_-1	0.13132
AMRU_Ao_ATTTCTGCAGGTCTCG	AMRU	Ao	6938	PvP01_09_v1_685_-_PVP01_0905800_-1	0.0765169
AMRU_Ao_ATTTCTGGTCAGGACA	AMRU	Ao	1754	PvP01_09_v1_685_-_PVP01_0905800_-1	0
AMRU_Ao_ATTTCTGGTCCGTGAC	AMRU	Ao	1197	PvP01_09_v1_685_-_PVP01_0905800_-1	0.148677
AMRU_Ao_ATTTCTGGTCTCAACA	AMRU	Ao	7608	PvP01_09_v1_685_-_PVP01_0905800_-1	0
AMRU_Ao_ATTTCTGTCCCAGGTG	AMRU	Ao	4220	PvP01_09_v1_685_-_PVP01_0905800_-1	0.0959601
AMRU_Ao_ATTTCTGTCTACCTGC	AMRU	Ao	2737	PvP01_09_v1_685_-_PVP01_0905800_-1	0.087581
AMRU_Ao_CAACCAAAGAAACGAG	AMRU	Ao	4105	PvP01_09_v1_685_-_PVP01_0905800_-1	0.561956
AMRU_Ao_CAACCAAGTAGCTTGT	AMRU	Ao	6519	PvP01_09_v1_685_-_PVP01_0905800_-1	0.335667
AMRU_Ao_CAACCAAGTCGGCTCA	AMRU	Ao	97	PvP01_09_v1_685_-_PVP01_0905800_-1	0
AMRU_Ao_CAACCAAGTCTAGTGT	AMRU	Ao	4117	PvP01_09_v1_685_-_PVP01_0905800_-1	0.0744158
AMRU_Ao_CAACCAATCAGTGCAT	AMRU	Ao	5964	PvP01_09_v1_685_-_PVP01_0905800_-1	1.83592
AMRU_Ao_CAACCTCCACCGAAAG	AMRU	Ao	2916	PvP01_09_v1_685_-_PVP01_0905800_-1	0
AMRU_Ao_CAACCTCGTATCACCA	AMRU	Ao	4972	PvP01_09_v1_685_-_PVP01_0905800_-1	0.348809
AMRU_Ao_CAACCTCGTTAGAACA	AMRU	Ao	2165	PvP01_09_v1_685_-_PVP01_0905800_-1	0.141193
AMRU_Ao_CAACTAGAGCGATAGC	AMRU	Ao	2726	PvP01_09_v1_685_-_PVP01_0905800_-1	0
AMRU_Ao_CAAGAAACACTAGTAC	AMRU	Ao	8370	PvP01_09_v1_685_-_PVP01_0905800_-1	0
AMRU_Ao_CAAGAAAGTTGAGGTG	AMRU	Ao	5728	PvP01_09_v1_685_-_PVP01_0905800_-1	2.05004
AMRU_Ao_CAAGATCAGTGAACGC	AMRU	Ao	2427	PvP01_09_v1_685_-_PVP01_0905800_-1	0.0653211
AMRU_Ao_CAAGATCCACATGTGT	AMRU	Ao	5241	PvP01_09_v1_685_-_PVP01_0905800_-1	0.481213
AMRU_Ao_CAAGATCGTACCGGCT	AMRU	Ao	3777	PvP01_09_v1_685_-_PVP01_0905800_-1	0.828002
AMRU_Ao_CAAGATCGTCATATCG	AMRU	Ao	5340	PvP01_09_v1_685_-_PVP01_0905800_-1	0.320616
AMRU_Ao_CAAGATCGTCCCGACA	AMRU	Ao	4249	PvP01_09_v1_685_-_PVP01_0905800_-1	0.0957167
AMRU_Ao_CAAGATCTCTATGTGG	AMRU	Ao	6744	PvP01_09_v1_685_-_PVP01_0905800_-1	0.510749
AMRU_Ao_CAAGGCCAGACGCTTT	AMRU	Ao	8216	PvP01_09_v1_685_-_PVP01_0905800_-1	0.174019
AMRU_Ao_CAAGGCCTCAGGTAAA	AMRU	Ao	3643	PvP01_09_v1_685_-_PVP01_0905800_-1	0.0493097
AMRU_Ao_CAAGGCCTCCGTCAAA	AMRU	Ao	5618	PvP01_09_v1_685_-_PVP01_0905800_-1	1.1893
AMRU_Ao_CAAGTTGAGGCATGTG	AMRU	Ao	7164	PvP01_09_v1_685_-_PVP01_0905800_-1	0
AMRU_Ao_CAAGTTGTCCTTGGTC	AMRU	Ao	4158	PvP01_09_v1_685_-_PVP01_0905800_-1	0.359066
AMRU_Ao_CACAAACAGAATGTGT	AMRU	Ao	3001	PvP01_09_v1_685_-_PVP01_0905800_-1	0.162884
AMRU_Ao_CACAAACCATGATCCA	AMRU	Ao	4173	PvP01_09_v1_685_-_PVP01_0905800_-1	0.894701
AMRU_Ao_CACAAACGTTCGCGAC	AMRU	Ao	2889	PvP01_09_v1_685_-_PVP01_0905800_-1	0
AMRU_Ao_CACAAACTCGCTTGTC	AMRU	Ao	8206	PvP01_09_v1_685_-_PVP01_0905800_-1	0.192279
AMRU_Ao_CACAAACTCTTCTGGC	AMRU	Ao	1834	PvP01_09_v1_685_-_PVP01_0905800_-1	0.0631074
AMRU_Ao_CACACAAAGAGTCGGT	AMRU	Ao	3062	PvP01_09_v1_685_-_PVP01_0905800_-1	0.174133
AMRU_Ao_CACACAAAGTCCGGTC	AMRU	Ao	5933	PvP01_09_v1_685_-_PVP01_0905800_-1	2.55978
AMRU_Ao_CACACAAAGTGGACGT	AMRU	Ao	1983	PvP01_09_v1_685_-_PVP01_0905800_-1	0
AMRU_Ao_CACACAACATTGGGCC	AMRU	Ao	2028	PvP01_09_v1_685_-_PVP01_0905800_-1	0.276759
AMRU_Ao_CACACTCCAGCCTGTG	AMRU	Ao	4437	PvP01_09_v1_685_-_PVP01_0905800_-1	0.158328
AMRU_Ao_CACAGGCAGGCGACAT	AMRU	Ao	6168	PvP01_09_v1_685_-_PVP01_0905800_-1	0.807609
AMRU_Ao_CACAGGCGTCTGGAGA	AMRU	Ao	5464	PvP01_09_v1_685_-_PVP01_0905800_-1	0.486295
AMRU_Ao_CACATAGGTACTCGCG	AMRU	Ao	6456	PvP01_09_v1_685_-_PVP01_0905800_-1	0.101379
AMRU_Ao_CACATAGTCCAAACTG	AMRU	Ao	29	PvP01_09_v1_685_-_PVP01_0905800_-1	0
AMRU_Ao_CACATTTGTTAGTGGG	AMRU	Ao	4724	PvP01_09_v1_685_-_PVP01_0905800_-1	0.0465095
AMRU_Ao_CACATTTTCAATCACG	AMRU	Ao	2330	PvP01_09_v1_685_-_PVP01_0905800_-1	0.129132
AMRU_Ao_CACCACTCATCACGAT	AMRU	Ao	1270	PvP01_09_v1_685_-_PVP01_0905800_-1	0
AMRU_Ao_CACCACTGTAGCCTCG	AMRU	Ao	3350	PvP01_09_v1_685_-_PVP01_0905800_-1	0.416216
AMRU_Ao_CACCACTTCCTGTAGA	AMRU	Ao	3729	PvP01_09_v1_685_-_PVP01_0905800_-1	0.0970356
AMRU_Ao_CACCAGGAGTGGGCTA	AMRU	Ao	2020	PvP01_09_v1_685_-_PVP01_0905800_-1	0.0460342
AMRU_Ao_CACCAGGGTGAAAGAG	AMRU	Ao	3605	PvP01_09_v1_685_-_PVP01_0905800_-1	0.529381
AMRU_Ao_CACCTTGAGCTAACAA	AMRU	Ao	4680	PvP01_09_v1_685_-_PVP01_0905800_-1	0.321662
AMRU_Ao_CACCTTGTCGTATCAG	AMRU	Ao	4528	PvP01_09_v1_685_-_PVP01_0905800_-1	1.06985
AMRU_Ao_CACCTTGTCTTGGGTA	AMRU	Ao	2001	PvP01_09_v1_685_-_PVP01_0905800_-1	0.273134
AMRU_Ao_CACTCCAAGCTTCGCG	AMRU	Ao	4226	PvP01_09_v1_685_-_PVP01_0905800_-1	0.728332
AMRU_Ao_CACTCCATCAAACCGT	AMRU	Ao	1431	PvP01_09_v1_685_-_PVP01_0905800_-1	0
AMRU_Ao_CAGAATCAGCGATTCT	AMRU	Ao	2895	PvP01_09_v1_685_-_PVP01_0905800_-1	0
AMRU_Ao_CAGAATCAGGACACCA	AMRU	Ao	7925	PvP01_09_v1_685_-_PVP01_0905800_-1	0.0610625
AMRU_Ao_CAGAATCAGGCTCTTA	AMRU	Ao	2835	PvP01_09_v1_685_-_PVP01_0905800_-1	0.0828706
AMRU_Ao_CAGAATCTCGATCCCT	AMRU	Ao	2152	PvP01_09_v1_685_-_PVP01_0905800_-1	0.551167
AMRU_Ao_CAGAGAGCAGACGCCT	AMRU	Ao	3861	PvP01_09_v1_685_-_PVP01_0905800_-1	0.234148
AMRU_Ao_CAGAGAGCATCACGAT	AMRU	Ao	1821	PvP01_09_v1_685_-_PVP01_0905800_-1	0
AMRU_Ao_CAGAGAGCATGAGCGA	AMRU	Ao	8949	PvP01_09_v1_685_-_PVP01_0905800_-1	0.165837
AMRU_Ao_CAGAGAGTCCACTCCA	AMRU	Ao	31	PvP01_09_v1_685_-_PVP01_0905800_-1	0
AMRU_Ao_CAGAGAGTCCCAACGG	AMRU	Ao	1503	PvP01_09_v1_685_-_PVP01_0905800_-1	0.0499351
AMRU_Ao_CAGATCAAGCTAAGAT	AMRU	Ao	2012	PvP01_09_v1_685_-_PVP01_0905800_-1	0
AMRU_Ao_CAGATCAAGGCTCATT	AMRU	Ao	8826	PvP01_09_v1_685_-_PVP01_0905800_-1	0.0566155
AMRU_Ao_CAGATCAGTACACCGC	AMRU	Ao	7855	PvP01_09_v1_685_-_PVP01_0905800_-1	0.125534
AMRU_Ao_CAGATCAGTTCAGGCC	AMRU	Ao	9062	PvP01_09_v1_685_-_PVP01_0905800_-1	0.242483
AMRU_Ao_CAGATCATCCCACTTG	AMRU	Ao	3202	PvP01_09_v1_685_-_PVP01_0905800_-1	0.23988
AMRU_Ao_CAGATCATCCTATGTT	AMRU	Ao	4516	PvP01_09_v1_685_-_PVP01_0905800_-1	0.208016
AMRU_Ao_CAGCAGCAGATCGATA	AMRU	Ao	2560	PvP01_09_v1_685_-_PVP01_0905800_-1	0
AMRU_Ao_CAGCAGCGTATAGGTA	AMRU	Ao	8345	PvP01_09_v1_685_-_PVP01_0905800_-1	0.486302
AMRU_Ao_CAGCAGCGTGTGACCC	AMRU	Ao	5133	PvP01_09_v1_685_-_PVP01_0905800_-1	0.331832
AMRU_Ao_CAGCATAAGTCAATAG	AMRU	Ao	3156	PvP01_09_v1_685_-_PVP01_0905800_-1	0
AMRU_Ao_CAGCATAAGTGCTGCC	AMRU	Ao	2323	PvP01_09_v1_685_-_PVP01_0905800_-1	0.309773
AMRU_Ao_CAGCCGAAGCGTGAGT	AMRU	Ao	3991	PvP01_09_v1_685_-_PVP01_0905800_-1	0.526399
AMRU_Ao_CAGCCGACAAAGGAAG	AMRU	Ao	735	PvP01_09_v1_685_-_PVP01_0905800_-1	0
AMRU_Ao_CAGCCGAGTCCTGCTT	AMRU	Ao	8743	PvP01_09_v1_685_-_PVP01_0905800_-1	0.130866
AMRU_Ao_CAGCGACCACCGATAT	AMRU	Ao	8899	PvP01_09_v1_685_-_PVP01_0905800_-1	0.136359
AMRU_Ao_CAGCGACCAGGTCTCG	AMRU	Ao	6698	PvP01_09_v1_685_-_PVP01_0905800_-1	0.375281
AMRU_Ao_CAGCGACGTAGGCATG	AMRU	Ao	4635	PvP01_09_v1_685_-_PVP01_0905800_-1	0.139198
AMRU_Ao_CAGCGACTCACCCGAG	AMRU	Ao	5007	PvP01_09_v1_685_-_PVP01_0905800_-1	0.732538
AMRU_Ao_CAGCGACTCCATGCTC	AMRU	Ao	2599	PvP01_09_v1_685_-_PVP01_0905800_-1	0.247341
AMRU_Ao_CAGCGACTCGACGGAA	AMRU	Ao	177	PvP01_09_v1_685_-_PVP01_0905800_-1	0
AMRU_Ao_CAGCTAAAGACCGGAT	AMRU	Ao	1989	PvP01_09_v1_685_-_PVP01_0905800_-1	0
AMRU_Ao_CAGCTAAAGTGTGAAT	AMRU	Ao	4393	PvP01_09_v1_685_-_PVP01_0905800_-1	0.955325
AMRU_Ao_CAGCTAACAAACCCAT	AMRU	Ao	2110	PvP01_09_v1_685_-_PVP01_0905800_-1	0.0877578
AMRU_Ao_CAGCTAAGTAAGGGCT	AMRU	Ao	2742	PvP01_09_v1_685_-_PVP01_0905800_-1	0.0882846
AMRU_Ao_CAGCTAAGTACCTACA	AMRU	Ao	4594	PvP01_09_v1_685_-_PVP01_0905800_-1	0.220371
AMRU_Ao_CAGCTAATCTTCATGT	AMRU	Ao	3093	PvP01_09_v1_685_-_PVP01_0905800_-1	0.102923
AMRU_Ao_CAGCTGGAGGAGCGAG	AMRU	Ao	8774	PvP01_09_v1_685_-_PVP01_0905800_-1	0.162037
AMRU_Ao_CAGCTGGAGTGTACCT	AMRU	Ao	4632	PvP01_09_v1_685_-_PVP01_0905800_-1	0.740773
AMRU_Ao_CAGCTGGCATCTATGG	AMRU	Ao	5518	PvP01_09_v1_685_-_PVP01_0905800_-1	0.278164
AMRU_Ao_CAGCTGGTCAACGCTA	AMRU	Ao	3037	PvP01_09_v1_685_-_PVP01_0905800_-1	0.185609
AMRU_Ao_CAGGTGCAGATCGGGT	AMRU	Ao	3723	PvP01_09_v1_685_-_PVP01_0905800_-1	0
AMRU_Ao_CAGGTGCCAATAGCAA	AMRU	Ao	4074	PvP01_09_v1_685_-_PVP01_0905800_-1	0.135062
AMRU_Ao_CAGGTGCCACGAGGTA	AMRU	Ao	8693	PvP01_09_v1_685_-_PVP01_0905800_-1	0.0258438
AMRU_Ao_CAGGTGCCATGACGGA	AMRU	Ao	2305	PvP01_09_v1_685_-_PVP01_0905800_-1	0.103799
AMRU_Ao_CAGGTGCGTACACCGC	AMRU	Ao	4750	PvP01_09_v1_685_-_PVP01_0905800_-1	0.47791
AMRU_Ao_CAGGTGCGTTCAACCA	AMRU	Ao	3293	PvP01_09_v1_685_-_PVP01_0905800_-1	0.168976
AMRU_Ao_CAGGTGCGTTGCGCAC	AMRU	Ao	8069	PvP01_09_v1_685_-_PVP01_0905800_-1	0.12721
AMRU_Ao_CAGTAACCACTATCTT	AMRU	Ao	4300	PvP01_09_v1_685_-_PVP01_0905800_-1	0
AMRU_Ao_CAGTAACTCAGGCAAG	AMRU	Ao	3351	PvP01_09_v1_685_-_PVP01_0905800_-1	0.17138
AMRU_Ao_CAGTCCTAGTGTCCCG	AMRU	Ao	8487	PvP01_09_v1_685_-_PVP01_0905800_-1	0.0193663
AMRU_Ao_CAGTCCTCAATCGGTT	AMRU	Ao	3780	PvP01_09_v1_685_-_PVP01_0905800_-1	0
AMRU_Ao_CAGTCCTGTCTGCCAG	AMRU	Ao	6305	PvP01_09_v1_685_-_PVP01_0905800_-1	0.206964
AMRU_Ao_CAGTCCTTCGCCAAAT	AMRU	Ao	5378	PvP01_09_v1_685_-_PVP01_0905800_-1	0.825026
AMRU_Ao_CAGTCCTTCGGCGCTA	AMRU	Ao	3565	PvP01_09_v1_685_-_PVP01_0905800_-1	0.166639
AMRU_Ao_CATATGGAGTGAAGAG	AMRU	Ao	3923	PvP01_09_v1_685_-_PVP01_0905800_-1	0.0842105
AMRU_Ao_CATATGGCAAACAACA	AMRU	Ao	4016	PvP01_09_v1_685_-_PVP01_0905800_-1	0
AMRU_Ao_CATATTCAGAAGCCCA	AMRU	Ao	7852	PvP01_09_v1_685_-_PVP01_0905800_-1	0.0505945
AMRU_Ao_CATATTCAGCGGCTTC	AMRU	Ao	8904	PvP01_09_v1_685_-_PVP01_0905800_-1	0.0545345
AMRU_Ao_CATATTCAGGCTCAGA	AMRU	Ao	8332	PvP01_09_v1_685_-_PVP01_0905800_-1	0.177093
AMRU_Ao_CATATTCCAAACCCAT	AMRU	Ao	2969	PvP01_09_v1_685_-_PVP01_0905800_-1	0.269324
AMRU_Ao_CATATTCCATCCCATC	AMRU	Ao	4060	PvP01_09_v1_685_-_PVP01_0905800_-1	0.0986875
AMRU_Ao_CATATTCGTAACGTTC	AMRU	Ao	8153	PvP01_09_v1_685_-_PVP01_0905800_-1	0.199267
AMRU_Ao_CATATTCGTATCTGCA	AMRU	Ao	2378	PvP01_09_v1_685_-_PVP01_0905800_-1	0.197472
AMRU_Ao_CATATTCTCAGTACGT	AMRU	Ao	3411	PvP01_09_v1_685_-_PVP01_0905800_-1	0.559199
AMRU_Ao_CATCAAGAGAAGATTC	AMRU	Ao	8146	PvP01_09_v1_685_-_PVP01_0905800_-1	0.0222568
AMRU_Ao_CATCAAGAGAATGTGT	AMRU	Ao	8895	PvP01_09_v1_685_-_PVP01_0905800_-1	0.0437388
AMRU_Ao_CATCAAGAGCACAGGT	AMRU	Ao	7965	PvP01_09_v1_685_-_PVP01_0905800_-1	0
AMRU_Ao_CATCAAGCAATGGTCT	AMRU	Ao	4495	PvP01_09_v1_685_-_PVP01_0905800_-1	0.340208
AMRU_Ao_CATCAAGGTCACACGC	AMRU	Ao	3562	PvP01_09_v1_685_-_PVP01_0905800_-1	0.661594
AMRU_Ao_CATCAAGGTGTAAGTA	AMRU	Ao	9165	PvP01_09_v1_685_-_PVP01_0905800_-1	0.756773
AMRU_Ao_CATCAGAAGCTAGGCA	AMRU	Ao	3009	PvP01_09_v1_685_-_PVP01_0905800_-1	0
AMRU_Ao_CATCAGACAGCATGAG	AMRU	Ao	7848	PvP01_09_v1_685_-_PVP01_0905800_-1	0.0668494
AMRU_Ao_CATCAGATCCAGAGGA	AMRU	Ao	3652	PvP01_09_v1_685_-_PVP01_0905800_-1	0.0503221
AMRU_Ao_CATCCACAGATCCCGC	AMRU	Ao	2723	PvP01_09_v1_685_-_PVP01_0905800_-1	0.251889
AMRU_Ao_CATCCACCACAACGCC	AMRU	Ao	3941	PvP01_09_v1_685_-_PVP01_0905800_-1	0.630616
AMRU_Ao_CATCGAACAGGACCCT	AMRU	Ao	6082	PvP01_09_v1_685_-_PVP01_0905800_-1	0.747698
AMRU_Ao_CATCGAACAGGTCCAC	AMRU	Ao	3710	PvP01_09_v1_685_-_PVP01_0905800_-1	0.352651
AMRU_Ao_CATCGAAGTCCGACGT	AMRU	Ao	4371	PvP01_09_v1_685_-_PVP01_0905800_-1	0.946298
AMRU_Ao_CATCGAAGTGCGCTTG	AMRU	Ao	5794	PvP01_09_v1_685_-_PVP01_0905800_-1	1.16232
AMRU_Ao_CATCGGGAGCTTTGGT	AMRU	Ao	9065	PvP01_09_v1_685_-_PVP01_0905800_-1	0.0617475
AMRU_Ao_CATCGGGCAGATTGCT	AMRU	Ao	2813	PvP01_09_v1_685_-_PVP01_0905800_-1	0
AMRU_Ao_CATCGGGCATCTGGTA	AMRU	Ao	2116	PvP01_09_v1_685_-_PVP01_0905800_-1	0
AMRU_Ao_CATCGGGGTCTAACGT	AMRU	Ao	3404	PvP01_09_v1_685_-_PVP01_0905800_-1	0.123908
AMRU_Ao_CATCGGGGTCTAGCCG	AMRU	Ao	5154	PvP01_09_v1_685_-_PVP01_0905800_-1	0.806777
AMRU_Ao_CATCGGGGTTCAGACT	AMRU	Ao	3126	PvP01_09_v1_685_-_PVP01_0905800_-1	0
AMRU_Ao_CATGACAAGGATGCGT	AMRU	Ao	3639	PvP01_09_v1_685_-_PVP01_0905800_-1	0.275444
AMRU_Ao_CATGACACAGACGCAA	AMRU	Ao	5745	PvP01_09_v1_685_-_PVP01_0905800_-1	0.415369
AMRU_Ao_CATGACAGTAGGCTGA	AMRU	Ao	6041	PvP01_09_v1_685_-_PVP01_0905800_-1	0.819389
AMRU_Ao_CATGACATCATCGCTC	AMRU	Ao	4087	PvP01_09_v1_685_-_PVP01_0905800_-1	0.343947
AMRU_Ao_CATGCCTAGAGTGAGA	AMRU	Ao	6348	PvP01_09_v1_685_-_PVP01_0905800_-1	0.598593
AMRU_Ao_CATGCCTAGTTACGGG	AMRU	Ao	44	PvP01_09_v1_685_-_PVP01_0905800_-1	0
AMRU_Ao_CATGCCTGTATTCTCT	AMRU	Ao	4596	PvP01_09_v1_685_-_PVP01_0905800_-1	0.350245
AMRU_Ao_CATGGCGCAGTAAGCG	AMRU	Ao	4328	PvP01_09_v1_685_-_PVP01_0905800_-1	0.233727
AMRU_Ao_CATGGCGGTCAACATC	AMRU	Ao	5153	PvP01_09_v1_685_-_PVP01_0905800_-1	1.54619
AMRU_Ao_CATGGCGTCAACGGGA	AMRU	Ao	2715	PvP01_09_v1_685_-_PVP01_0905800_-1	0
AMRU_Ao_CATGGCGTCCATGCTC	AMRU	Ao	6768	PvP01_09_v1_685_-_PVP01_0905800_-1	1.42939
AMRU_Ao_CATGGCGTCCCACTTG	AMRU	Ao	2685	PvP01_09_v1_685_-_PVP01_0905800_-1	0.181307
AMRU_Ao_CATTATCAGATAGCAT	AMRU	Ao	2163	PvP01_09_v1_685_-_PVP01_0905800_-1	0.117165
AMRU_Ao_CATTATCCAATCACAC	AMRU	Ao	2644	PvP01_09_v1_685_-_PVP01_0905800_-1	0.350985
AMRU_Ao_CATTATCCAGGACCCT	AMRU	Ao	8815	PvP01_09_v1_685_-_PVP01_0905800_-1	0.0223324
AMRU_Ao_CATTATCCAGGGTACA	AMRU	Ao	2480	PvP01_09_v1_685_-_PVP01_0905800_-1	0
AMRU_Ao_CATTATCTCATGGTCA	AMRU	Ao	6979	PvP01_09_v1_685_-_PVP01_0905800_-1	0
AMRU_Ao_CATTATCTCCAGTAGT	AMRU	Ao	4940	PvP01_09_v1_685_-_PVP01_0905800_-1	0.392893
AMRU_Ao_CATTATCTCGGCGGTT	AMRU	Ao	68	PvP01_09_v1_685_-_PVP01_0905800_-1	0
AMRU_Ao_CATTCGCCAAGCCGCT	AMRU	Ao	5081	PvP01_09_v1_685_-_PVP01_0905800_-1	1.54527
AMRU_Ao_CATTCGCCATCAGTAC	AMRU	Ao	3257	PvP01_09_v1_685_-_PVP01_0905800_-1	0.244642
AMRU_Ao_CATTCGCCATGTAAGA	AMRU	Ao	2646	PvP01_09_v1_685_-_PVP01_0905800_-1	0
AMRU_Ao_CATTCGCGTGCCTGCA	AMRU	Ao	3402	PvP01_09_v1_685_-_PVP01_0905800_-1	0.0897223
AMRU_Ao_CATTCGCTCAAACGGG	AMRU	Ao	2444	PvP01_09_v1_685_-_PVP01_0905800_-1	0
AMRU_Ao_CCAATCCAGTCAATAG	AMRU	Ao	3889	PvP01_09_v1_685_-_PVP01_0905800_-1	0.392876
AMRU_Ao_CCAATCCGTACCATCA	AMRU	Ao	8737	PvP01_09_v1_685_-_PVP01_0905800_-1	0.245449
AMRU_Ao_CCAATCCGTTGCTCCT	AMRU	Ao	5471	PvP01_09_v1_685_-_PVP01_0905800_-1	1.06024
AMRU_Ao_CCACCTAAGCCAACAG	AMRU	Ao	4037	PvP01_09_v1_685_-_PVP01_0905800_-1	0.0323279
AMRU_Ao_CCACCTAGTGACAAAT	AMRU	Ao	8202	PvP01_09_v1_685_-_PVP01_0905800_-1	0.151057
AMRU_Ao_CCACCTAGTTGTTTGG	AMRU	Ao	4955	PvP01_09_v1_685_-_PVP01_0905800_-1	0
AMRU_Ao_CCACCTATCAACCAAC	AMRU	Ao	9067	PvP01_09_v1_685_-_PVP01_0905800_-1	0.232221
AMRU_Ao_CCACCTATCCTCAATT	AMRU	Ao	8933	PvP01_09_v1_685_-_PVP01_0905800_-1	0.155269
AMRU_Ao_CCACGGAAGAGACTAT	AMRU	Ao	364	PvP01_09_v1_685_-_PVP01_0905800_-1	0
AMRU_Ao_CCACGGACACAACGCC	AMRU	Ao	7362	PvP01_09_v1_685_-_PVP01_0905800_-1	0
AMRU_Ao_CCACGGACACCAACCG	AMRU	Ao	5171	PvP01_09_v1_685_-_PVP01_0905800_-1	0.533773
AMRU_Ao_CCACGGAGTTCTCATT	AMRU	Ao	2283	PvP01_09_v1_685_-_PVP01_0905800_-1	0.0869338
AMRU_Ao_CCACTACCAACAACCT	AMRU	Ao	8692	PvP01_09_v1_685_-_PVP01_0905800_-1	0.0652415
AMRU_Ao_CCACTACGTGCCTGGT	AMRU	Ao	3647	PvP01_09_v1_685_-_PVP01_0905800_-1	0.493827
AMRU_Ao_CCACTACTCTATCCTA	AMRU	Ao	4268	PvP01_09_v1_685_-_PVP01_0905800_-1	0.326356
AMRU_Ao_CCAGCGAAGAGCAATT	AMRU	Ao	3773	PvP01_09_v1_685_-_PVP01_0905800_-1	0.674855
AMRU_Ao_CCAGCGAGTAAGGGCT	AMRU	Ao	400	PvP01_09_v1_685_-_PVP01_0905800_-1	0
AMRU_Ao_CCAGCGAGTCGGATCC	AMRU	Ao	4185	PvP01_09_v1_685_-_PVP01_0905800_-1	0.258498
AMRU_Ao_CCATGTCGTGCGATAG	AMRU	Ao	2209	PvP01_09_v1_685_-_PVP01_0905800_-1	0.0835771
AMRU_Ao_CCATGTCTCCAACCAA	AMRU	Ao	7808	PvP01_09_v1_685_-_PVP01_0905800_-1	0
AMRU_Ao_CCATGTCTCCGCATCT	AMRU	Ao	4099	PvP01_09_v1_685_-_PVP01_0905800_-1	0
AMRU_Ao_CCATTCGAGTGTCCCG	AMRU	Ao	4576	PvP01_09_v1_685_-_PVP01_0905800_-1	0.0425586
AMRU_Ao_CCATTCGCAGTGAGTG	AMRU	Ao	8437	PvP01_09_v1_685_-_PVP01_0905800_-1	0.106832
AMRU_Ao_CCATTCGGTTATGCGT	AMRU	Ao	5242	PvP01_09_v1_685_-_PVP01_0905800_-1	0.146902
AMRU_Ao_CCATTCGTCGTTGACA	AMRU	Ao	1878	PvP01_09_v1_685_-_PVP01_0905800_-1	0.0731582
AMRU_Ao_CCCAATCAGCGTCAAG	AMRU	Ao	2284	PvP01_09_v1_685_-_PVP01_0905800_-1	0
AMRU_Ao_CCCAATCCACGACTCG	AMRU	Ao	8764	PvP01_09_v1_685_-_PVP01_0905800_-1	0.23016
AMRU_Ao_CCCAATCGTCAATGTC	AMRU	Ao	2996	PvP01_09_v1_685_-_PVP01_0905800_-1	0.434594
AMRU_Ao_CCCAATCGTTCCTCCA	AMRU	Ao	3497	PvP01_09_v1_685_-_PVP01_0905800_-1	0.247051
AMRU_Ao_CCCAATCTCCGCGCAA	AMRU	Ao	4464	PvP01_09_v1_685_-_PVP01_0905800_-1	0.441579
AMRU_Ao_CCCAATCTCTACCTGC	AMRU	Ao	6045	PvP01_09_v1_685_-_PVP01_0905800_-1	0.96822
AMRU_Ao_CCCATACCAGATCTGT	AMRU	Ao	4567	PvP01_09_v1_685_-_PVP01_0905800_-1	0.308299
AMRU_Ao_CCCATACCAGCCTTGG	AMRU	Ao	7534	PvP01_09_v1_685_-_PVP01_0905800_-1	0.17001
AMRU_Ao_CCCATACGTAGGACAC	AMRU	Ao	20	PvP01_09_v1_685_-_PVP01_0905800_-1	0
AMRU_Ao_CCCATACTCTGAAAGA	AMRU	Ao	5039	PvP01_09_v1_685_-_PVP01_0905800_-1	1.18101
AMRU_Ao_CCCATACTCTTGTTTG	AMRU	Ao	4641	PvP01_09_v1_685_-_PVP01_0905800_-1	0.370233
AMRU_Ao_CCCTCCTTCAAGAAGT	AMRU	Ao	6898	PvP01_09_v1_685_-_PVP01_0905800_-1	0.0794155
AMRU_Ao_CCCTCCTTCGGAAACG	AMRU	Ao	7984	PvP01_09_v1_685_-_PVP01_0905800_-1	0.161442
AMRU_Ao_CCCTCCTTCTATCCTA	AMRU	Ao	5559	PvP01_09_v1_685_-_PVP01_0905800_-1	1.2145
AMRU_Ao_CCCTCCTTCTCAAACG	AMRU	Ao	3214	PvP01_09_v1_685_-_PVP01_0905800_-1	0.21167
AMRU_Ao_CCCTCCTTCTTATCTG	AMRU	Ao	6255	PvP01_09_v1_685_-_PVP01_0905800_-1	2.26767
AMRU_Ao_CCGGGATAGCGTTCCG	AMRU	Ao	7612	PvP01_09_v1_685_-_PVP01_0905800_-1	0.0689703
AMRU_Ao_CCGGGATAGTACGCCC	AMRU	Ao	2033	PvP01_09_v1_685_-_PVP01_0905800_-1	0
AMRU_Ao_CCGGGATCAACTTGAC	AMRU	Ao	6240	PvP01_09_v1_685_-_PVP01_0905800_-1	0.931185
AMRU_Ao_CCGGGATCAGCCTTGG	AMRU	Ao	5615	PvP01_09_v1_685_-_PVP01_0905800_-1	1.50143
AMRU_Ao_CCGGGATCATAAGACA	AMRU	Ao	3823	PvP01_09_v1_685_-_PVP01_0905800_-1	0.200575
AMRU_Ao_CCGGGATGTTCGAATC	AMRU	Ao	3318	PvP01_09_v1_685_-_PVP01_0905800_-1	0
AMRU_Ao_CCGGGATTCATAAAGG	AMRU	Ao	2830	PvP01_09_v1_685_-_PVP01_0905800_-1	0.245529
AMRU_Ao_CCGGGATTCCATGAAC	AMRU	Ao	707	PvP01_09_v1_685_-_PVP01_0905800_-1	0.187231
AMRU_Ao_CCGGGATTCTTGTCAT	AMRU	Ao	382	PvP01_09_v1_685_-_PVP01_0905800_-1	0.243324
AMRU_Ao_CCGGTAGTCTTTCCTC	AMRU	Ao	8738	PvP01_09_v1_685_-_PVP01_0905800_-1	0.131327
AMRU_Ao_CCGTACTCAGTGGGAT	AMRU	Ao	6	PvP01_09_v1_685_-_PVP01_0905800_-1	0
AMRU_Ao_CCGTACTCATACAGCT	AMRU	Ao	2459	PvP01_09_v1_685_-_PVP01_0905800_-1	0.0616789
AMRU_Ao_CCGTACTGTGAAATCA	AMRU	Ao	8319	PvP01_09_v1_685_-_PVP01_0905800_-1	0.191266
AMRU_Ao_CCGTGGAAGCGTTTAC	AMRU	Ao	5469	PvP01_09_v1_685_-_PVP01_0905800_-1	0.236976
AMRU_Ao_CCGTGGAAGCTGAACG	AMRU	Ao	2908	PvP01_09_v1_685_-_PVP01_0905800_-1	0
AMRU_Ao_CCGTGGAAGTCACGCC	AMRU	Ao	4561	PvP01_09_v1_685_-_PVP01_0905800_-1	0.640779
AMRU_Ao_CCGTGGACAGACAAGC	AMRU	Ao	4095	PvP01_09_v1_685_-_PVP01_0905800_-1	0.277296
AMRU_Ao_CCGTGGAGTTGTCTTT	AMRU	Ao	8369	PvP01_09_v1_685_-_PVP01_0905800_-1	0.157789
AMRU_Ao_CCGTGGATCAGTGTTG	AMRU	Ao	5	PvP01_09_v1_685_-_PVP01_0905800_-1	0
AMRU_Ao_CCGTGGATCGCACTCT	AMRU	Ao	8890	PvP01_09_v1_685_-_PVP01_0905800_-1	0.354702
AMRU_Ao_CCGTTCAAGCGTAGTG	AMRU	Ao	2532	PvP01_09_v1_685_-_PVP01_0905800_-1	0.125486
AMRU_Ao_CCGTTCAAGGTCATCT	AMRU	Ao	4756	PvP01_09_v1_685_-_PVP01_0905800_-1	0.204241
AMRU_Ao_CCGTTCAAGGTTACCT	AMRU	Ao	3630	PvP01_09_v1_685_-_PVP01_0905800_-1	1.54949
AMRU_Ao_CCGTTCAGTATCTGCA	AMRU	Ao	7651	PvP01_09_v1_685_-_PVP01_0905800_-1	0
AMRU_Ao_CCGTTCAGTTCCACAA	AMRU	Ao	4481	PvP01_09_v1_685_-_PVP01_0905800_-1	0.344709
AMRU_Ao_CCGTTCATCAGCTGGC	AMRU	Ao	8776	PvP01_09_v1_685_-_PVP01_0905800_-1	0.119082
AMRU_Ao_CCGTTCATCCATGAAC	AMRU	Ao	3387	PvP01_09_v1_685_-_PVP01_0905800_-1	0.080795
AMRU_Ao_CCTAAAGAGAGCCTAG	AMRU	Ao	6140	PvP01_09_v1_685_-_PVP01_0905800_-1	1.69273
AMRU_Ao_CCTAAAGCACCCTATC	AMRU	Ao	2080	PvP01_09_v1_685_-_PVP01_0905800_-1	0.111601
AMRU_Ao_CCTAAAGCATGGGAAC	AMRU	Ao	660	PvP01_09_v1_685_-_PVP01_0905800_-1	0.180522
AMRU_Ao_CCTACACAGTAATCCC	AMRU	Ao	2180	PvP01_09_v1_685_-_PVP01_0905800_-1	0.250773
AMRU_Ao_CCTACACAGTACGCGA	AMRU	Ao	5191	PvP01_09_v1_685_-_PVP01_0905800_-1	0.339839
AMRU_Ao_CCTACACTCGAACGGA	AMRU	Ao	3985	PvP01_09_v1_685_-_PVP01_0905800_-1	0.335796
AMRU_Ao_CCTACCAAGAGTAATC	AMRU	Ao	1982	PvP01_09_v1_685_-_PVP01_0905800_-1	0.056243
AMRU_Ao_CCTACCAGTGTGGTTT	AMRU	Ao	3618	PvP01_09_v1_685_-_PVP01_0905800_-1	0.2367
AMRU_Ao_CCTAGCTGTAGGCTGA	AMRU	Ao	3692	PvP01_09_v1_685_-_PVP01_0905800_-1	0.256568
AMRU_Ao_CCTATTAGTGCAGTAG	AMRU	Ao	7820	PvP01_09_v1_685_-_PVP01_0905800_-1	0
AMRU_Ao_CCTATTATCCAAGTAC	AMRU	Ao	5325	PvP01_09_v1_685_-_PVP01_0905800_-1	0.962025
AMRU_Ao_CCTATTATCGCATGGC	AMRU	Ao	99	PvP01_09_v1_685_-_PVP01_0905800_-1	0
AMRU_Ao_CCTCAGTAGAGAGCTC	AMRU	Ao	2978	PvP01_09_v1_685_-_PVP01_0905800_-1	0
AMRU_Ao_CCTCAGTGTAAGTGTA	AMRU	Ao	4281	PvP01_09_v1_685_-_PVP01_0905800_-1	0.0540716
AMRU_Ao_CCTCAGTGTACGCACC	AMRU	Ao	5411	PvP01_09_v1_685_-_PVP01_0905800_-1	0.283678
AMRU_Ao_CCTCTGAAGCCAGAAC	AMRU	Ao	7858	PvP01_09_v1_685_-_PVP01_0905800_-1	0.155733
AMRU_Ao_CCTCTGAAGTGTCCCG	AMRU	Ao	5827	PvP01_09_v1_685_-_PVP01_0905800_-1	1.67314
AMRU_Ao_CCTCTGAGTCAAGCGA	AMRU	Ao	32	PvP01_09_v1_685_-_PVP01_0905800_-1	0
AMRU_Ao_CCTCTGATCATCGATG	AMRU	Ao	3752	PvP01_09_v1_685_-_PVP01_0905800_-1	0
AMRU_Ao_CCTTACGAGAAGATTC	AMRU	Ao	7972	PvP01_09_v1_685_-_PVP01_0905800_-1	0.214754
AMRU_Ao_CCTTACGCAATACGCT	AMRU	Ao	5485	PvP01_09_v1_685_-_PVP01_0905800_-1	0.518553
AMRU_Ao_CCTTACGGTTATCACG	AMRU	Ao	9071	PvP01_09_v1_685_-_PVP01_0905800_-1	0
AMRU_Ao_CCTTACGTCAGTTAGC	AMRU	Ao	5409	PvP01_09_v1_685_-_PVP01_0905800_-1	1.1247
AMRU_Ao_CCTTACGTCATGTCCC	AMRU	Ao	8478	PvP01_09_v1_685_-_PVP01_0905800_-1	0.0685284
AMRU_Ao_CCTTCCCGTGGCCCTA	AMRU	Ao	6269	PvP01_09_v1_685_-_PVP01_0905800_-1	0.767801
AMRU_Ao_CCTTCGAAGGAGCGTT	AMRU	Ao	8833	PvP01_09_v1_685_-_PVP01_0905800_-1	0.100964
AMRU_Ao_CCTTTCTAGTGTTAGA	AMRU	Ao	5207	PvP01_09_v1_685_-_PVP01_0905800_-1	0.530997
AMRU_Ao_CCTTTCTGTTCCAACA	AMRU	Ao	2507	PvP01_09_v1_685_-_PVP01_0905800_-1	0.793273
AMRU_Ao_CCTTTCTGTTGATTGC	AMRU	Ao	4455	PvP01_09_v1_685_-_PVP01_0905800_-1	0.176481
AMRU_Ao_CGAACATAGTAGGTGC	AMRU	Ao	2473	PvP01_09_v1_685_-_PVP01_0905800_-1	0.400939
AMRU_Ao_CGAACATCAAGCCGCT	AMRU	Ao	3295	PvP01_09_v1_685_-_PVP01_0905800_-1	0.497124
AMRU_Ao_CGAACATGTTACCAGT	AMRU	Ao	4306	PvP01_09_v1_685_-_PVP01_0905800_-1	1.09737
AMRU_Ao_CGAACATTCTGTCTCG	AMRU	Ao	733	PvP01_09_v1_685_-_PVP01_0905800_-1	0.0933489
AMRU_Ao_CGAATGTCAGTAAGCG	AMRU	Ao	5142	PvP01_09_v1_685_-_PVP01_0905800_-1	0.839631
AMRU_Ao_CGAATGTGTCGAAAGC	AMRU	Ao	4301	PvP01_09_v1_685_-_PVP01_0905800_-1	0.473765
AMRU_Ao_CGAATGTTCGAGGTAG	AMRU	Ao	5383	PvP01_09_v1_685_-_PVP01_0905800_-1	0.387691
AMRU_Ao_CGACCTTAGAAGGGTA	AMRU	Ao	6342	PvP01_09_v1_685_-_PVP01_0905800_-1	0.747333
AMRU_Ao_CGACCTTAGGACAGAA	AMRU	Ao	8020	PvP01_09_v1_685_-_PVP01_0905800_-1	0.194709
AMRU_Ao_CGACCTTGTCAACATC	AMRU	Ao	105	PvP01_09_v1_685_-_PVP01_0905800_-1	0
AMRU_Ao_CGACCTTGTCCAACTA	AMRU	Ao	8908	PvP01_09_v1_685_-_PVP01_0905800_-1	0.250421
AMRU_Ao_CGACCTTGTGTAATGA	AMRU	Ao	2562	PvP01_09_v1_685_-_PVP01_0905800_-1	0.480077
AMRU_Ao_CGAGAAGCAAGCCGTC	AMRU	Ao	3094	PvP01_09_v1_685_-_PVP01_0905800_-1	0.330743
AMRU_Ao_CGAGAAGCAATCGAAA	AMRU	Ao	5823	PvP01_09_v1_685_-_PVP01_0905800_-1	0.403172
AMRU_Ao_CGAGCACCACAACGTT	AMRU	Ao	6125	PvP01_09_v1_685_-_PVP01_0905800_-1	1.47842
AMRU_Ao_CGAGCACTCCATGAGT	AMRU	Ao	1334	PvP01_09_v1_685_-_PVP01_0905800_-1	0.208247
AMRU_Ao_CGAGCACTCTCGCATC	AMRU	Ao	8775	PvP01_09_v1_685_-_PVP01_0905800_-1	0.0530814
AMRU_Ao_CGAGCCAAGAGACGAA	AMRU	Ao	4097	PvP01_09_v1_685_-_PVP01_0905800_-1	0.422333
AMRU_Ao_CGAGCCAAGGGAGTAA	AMRU	Ao	1494	PvP01_09_v1_685_-_PVP01_0905800_-1	0
AMRU_Ao_CGAGCCACAAGAAAGG	AMRU	Ao	3996	PvP01_09_v1_685_-_PVP01_0905800_-1	0.124254
AMRU_Ao_CGAGCCAGTTGTGGCC	AMRU	Ao	5382	PvP01_09_v1_685_-_PVP01_0905800_-1	0.398268
AMRU_Ao_CGAGCCATCTACCAGA	AMRU	Ao	2488	PvP01_09_v1_685_-_PVP01_0905800_-1	0.0546837
AMRU_Ao_CGATCGGCAAGCCTAT	AMRU	Ao	3069	PvP01_09_v1_685_-_PVP01_0905800_-1	0.0989315
AMRU_Ao_CGATCGGGTAGCGATG	AMRU	Ao	6103	PvP01_09_v1_685_-_PVP01_0905800_-1	0.963438
AMRU_Ao_CGATCGGGTGTAACGG	AMRU	Ao	8601	PvP01_09_v1_685_-_PVP01_0905800_-1	0
AMRU_Ao_CGATCGGTCATTCACT	AMRU	Ao	3654	PvP01_09_v1_685_-_PVP01_0905800_-1	0.211608
AMRU_Ao_CGATCGGTCCAGTAGT	AMRU	Ao	6967	PvP01_09_v1_685_-_PVP01_0905800_-1	0.0598838
AMRU_Ao_CGATGGCAGACCGGAT	AMRU	Ao	4033	PvP01_09_v1_685_-_PVP01_0905800_-1	0.193548
AMRU_Ao_CGATGGCAGATACACA	AMRU	Ao	8618	PvP01_09_v1_685_-_PVP01_0905800_-1	0.299324
AMRU_Ao_CGATGGCCACAACGCC	AMRU	Ao	2015	PvP01_09_v1_685_-_PVP01_0905800_-1	0
AMRU_Ao_CGATGGCCAGGGTATG	AMRU	Ao	244	PvP01_09_v1_685_-_PVP01_0905800_-1	0
AMRU_Ao_CGATGGCCAGTCTTCC	AMRU	Ao	2414	PvP01_09_v1_685_-_PVP01_0905800_-1	0.518571
AMRU_Ao_CGATGGCTCAGGTAAA	AMRU	Ao	7038	PvP01_09_v1_685_-_PVP01_0905800_-1	0
AMRU_Ao_CGATGGCTCATTTGGG	AMRU	Ao	4155	PvP01_09_v1_685_-_PVP01_0905800_-1	0
AMRU_Ao_CGATGTAAGGAGCGTT	AMRU	Ao	3487	PvP01_09_v1_685_-_PVP01_0905800_-1	0.041841
AMRU_Ao_CGATGTACAGGAATGC	AMRU	Ao	4723	PvP01_09_v1_685_-_PVP01_0905800_-1	0.0658133
AMRU_Ao_CGATGTACAGGATTGG	AMRU	Ao	3162	PvP01_09_v1_685_-_PVP01_0905800_-1	0.370439
AMRU_Ao_CGATGTATCGGTTCGG	AMRU	Ao	8447	PvP01_09_v1_685_-_PVP01_0905800_-1	0.403975
AMRU_Ao_CGATTGAAGAAAGTGG	AMRU	Ao	427	PvP01_09_v1_685_-_PVP01_0905800_-1	0.124285
AMRU_Ao_CGATTGAAGGCGCTCT	AMRU	Ao	8622	PvP01_09_v1_685_-_PVP01_0905800_-1	0.123077
AMRU_Ao_CGATTGAAGTGAACGC	AMRU	Ao	2999	PvP01_09_v1_685_-_PVP01_0905800_-1	0.0534702
AMRU_Ao_CGATTGATCGAATGGG	AMRU	Ao	2425	PvP01_09_v1_685_-_PVP01_0905800_-1	0.111117
AMRU_Ao_CGATTGATCGCCATAA	AMRU	Ao	3034	PvP01_09_v1_685_-_PVP01_0905800_-1	0.190431
AMRU_Ao_CGCCAAGAGCGCCTTG	AMRU	Ao	8099	PvP01_09_v1_685_-_PVP01_0905800_-1	0.275799
AMRU_Ao_CGCGGTAAGGGCATGT	AMRU	Ao	8757	PvP01_09_v1_685_-_PVP01_0905800_-1	0.121521
AMRU_Ao_CGCGGTAAGTACGCGA	AMRU	Ao	8198	PvP01_09_v1_685_-_PVP01_0905800_-1	0.333627
AMRU_Ao_CGCGGTAGTCGCCATG	AMRU	Ao	3953	PvP01_09_v1_685_-_PVP01_0905800_-1	0.162747
AMRU_Ao_CGCGGTAGTTCACCTC	AMRU	Ao	3684	PvP01_09_v1_685_-_PVP01_0905800_-1	0.0441345
AMRU_Ao_CGCGTTTCACGAAATA	AMRU	Ao	4923	PvP01_09_v1_685_-_PVP01_0905800_-1	0.706381
AMRU_Ao_CGCGTTTCAGTTTACG	AMRU	Ao	8710	PvP01_09_v1_685_-_PVP01_0905800_-1	0
AMRU_Ao_CGCTATCAGCAGACTG	AMRU	Ao	2915	PvP01_09_v1_685_-_PVP01_0905800_-1	0.0668315
AMRU_Ao_CGCTATCCAACCGCCA	AMRU	Ao	6966	PvP01_09_v1_685_-_PVP01_0905800_-1	0.185839
AMRU_Ao_CGCTATCGTACATCCA	AMRU	Ao	5288	PvP01_09_v1_685_-_PVP01_0905800_-1	0.387207
AMRU_Ao_CGCTGGAAGGCTAGGT	AMRU	Ao	740	PvP01_09_v1_685_-_PVP01_0905800_-1	0
AMRU_Ao_CGCTGGACAGCTGGCT	AMRU	Ao	4201	PvP01_09_v1_685_-_PVP01_0905800_-1	0.0408313
AMRU_Ao_CGCTGGATCTAGAGTC	AMRU	Ao	8235	PvP01_09_v1_685_-_PVP01_0905800_-1	0.173057
AMRU_Ao_CGCTTCACAGCGATCC	AMRU	Ao	4090	PvP01_09_v1_685_-_PVP01_0905800_-1	0.229815
AMRU_Ao_CGCTTCAGTCAACTGT	AMRU	Ao	5353	PvP01_09_v1_685_-_PVP01_0905800_-1	0.734889
AMRU_Ao_CGCTTCAGTCACAAGG	AMRU	Ao	1308	PvP01_09_v1_685_-_PVP01_0905800_-1	0.214255
AMRU_Ao_CGCTTCATCCGCTGTT	AMRU	Ao	2318	PvP01_09_v1_685_-_PVP01_0905800_-1	0.15829
AMRU_Ao_CGGACACAGACAGGCT	AMRU	Ao	7184	PvP01_09_v1_685_-_PVP01_0905800_-1	0
AMRU_Ao_CGGACACGTTCCACGG	AMRU	Ao	2373	PvP01_09_v1_685_-_PVP01_0905800_-1	0.0586235
AMRU_Ao_CGGACACGTTTAAGCC	AMRU	Ao	4513	PvP01_09_v1_685_-_PVP01_0905800_-1	0
AMRU_Ao_CGGACACTCTTGCAAG	AMRU	Ao	8893	PvP01_09_v1_685_-_PVP01_0905800_-1	0.158124
AMRU_Ao_CGGACGTGTGCACGAA	AMRU	Ao	4142	PvP01_09_v1_685_-_PVP01_0905800_-1	0.0715052
AMRU_Ao_CGGACGTGTGCGGTAA	AMRU	Ao	4389	PvP01_09_v1_685_-_PVP01_0905800_-1	0.572082
AMRU_Ao_CGGAGCTAGTATTGGA	AMRU	Ao	5047	PvP01_09_v1_685_-_PVP01_0905800_-1	1.49082
AMRU_Ao_CGGAGCTGTAAATGTG	AMRU	Ao	4147	PvP01_09_v1_685_-_PVP01_0905800_-1	0.184006
AMRU_Ao_CGGAGCTGTCTCGTTC	AMRU	Ao	8040	PvP01_09_v1_685_-_PVP01_0905800_-1	0
AMRU_Ao_CGGAGCTGTGAAAGAG	AMRU	Ao	3908	PvP01_09_v1_685_-_PVP01_0905800_-1	0.289507
AMRU_Ao_CGGAGCTTCATCATTC	AMRU	Ao	4077	PvP01_09_v1_685_-_PVP01_0905800_-1	0.204092
AMRU_Ao_CGGAGCTTCTCTGTCG	AMRU	Ao	8652	PvP01_09_v1_685_-_PVP01_0905800_-1	0.0802032
AMRU_Ao_CGGCTAGAGAGTAAGG	AMRU	Ao	1636	PvP01_09_v1_685_-_PVP01_0905800_-1	0.472724
AMRU_Ao_CGGCTAGAGTATCGAA	AMRU	Ao	1393	PvP01_09_v1_685_-_PVP01_0905800_-1	0.255754
AMRU_Ao_CGGCTAGGTATGAATG	AMRU	Ao	8870	PvP01_09_v1_685_-_PVP01_0905800_-1	0.0516062
AMRU_Ao_CGGGTCAAGGTTCCTA	AMRU	Ao	8968	PvP01_09_v1_685_-_PVP01_0905800_-1	0.0211595
AMRU_Ao_CGGGTCAAGTGTACGG	AMRU	Ao	2668	PvP01_09_v1_685_-_PVP01_0905800_-1	0.104685
AMRU_Ao_CGGGTCACAACCGCCA	AMRU	Ao	3598	PvP01_09_v1_685_-_PVP01_0905800_-1	0.039412
AMRU_Ao_CGGGTCACAACTTGAC	AMRU	Ao	838	PvP01_09_v1_685_-_PVP01_0905800_-1	0
AMRU_Ao_CGGGTCACAGTGGGAT	AMRU	Ao	3746	PvP01_09_v1_685_-_PVP01_0905800_-1	0.569624
AMRU_Ao_CGGGTCAGTTAGATGA	AMRU	Ao	2867	PvP01_09_v1_685_-_PVP01_0905800_-1	0.0948497
AMRU_Ao_CGTAGCGAGGTGCACA	AMRU	Ao	4554	PvP01_09_v1_685_-_PVP01_0905800_-1	0.517464
AMRU_Ao_CGTAGCGAGTACCGGA	AMRU	Ao	5327	PvP01_09_v1_685_-_PVP01_0905800_-1	0.473005
AMRU_Ao_CGTAGCGCAATCGAAA	AMRU	Ao	6779	PvP01_09_v1_685_-_PVP01_0905800_-1	0.228746
AMRU_Ao_CGTAGCGTCACCACCT	AMRU	Ao	8393	PvP01_09_v1_685_-_PVP01_0905800_-1	0.0769986
AMRU_Ao_CGTAGCGTCCACGTTC	AMRU	Ao	4555	PvP01_09_v1_685_-_PVP01_0905800_-1	0.30092
AMRU_Ao_CGTAGCGTCCATGAAC	AMRU	Ao	4253	PvP01_09_v1_685_-_PVP01_0905800_-1	0.0928376
AMRU_Ao_CGTAGCGTCCCGGATG	AMRU	Ao	8243	PvP01_09_v1_685_-_PVP01_0905800_-1	0.0823299
AMRU_Ao_CGTAGCGTCGGATGGA	AMRU	Ao	5074	PvP01_09_v1_685_-_PVP01_0905800_-1	1.68962
AMRU_Ao_CGTAGGCAGACCTTTG	AMRU	Ao	3305	PvP01_09_v1_685_-_PVP01_0905800_-1	0
AMRU_Ao_CGTAGGCCAGGATTGG	AMRU	Ao	4453	PvP01_09_v1_685_-_PVP01_0905800_-1	0.658195
AMRU_Ao_CGTCACTCAGGCTCAC	AMRU	Ao	5330	PvP01_09_v1_685_-_PVP01_0905800_-1	0.8726
AMRU_Ao_CGTCACTGTCTGATTG	AMRU	Ao	6537	PvP01_09_v1_685_-_PVP01_0905800_-1	0.0651042
AMRU_Ao_CGTCACTGTGCATCTA	AMRU	Ao	4937	PvP01_09_v1_685_-_PVP01_0905800_-1	0.691988
AMRU_Ao_CGTCAGGAGCTAACAA	AMRU	Ao	4536	PvP01_09_v1_685_-_PVP01_0905800_-1	0.62467
AMRU_Ao_CGTCAGGCACGCCAGT	AMRU	Ao	3911	PvP01_09_v1_685_-_PVP01_0905800_-1	0.105955
AMRU_Ao_CGTCAGGCACTGCCAG	AMRU	Ao	8831	PvP01_09_v1_685_-_PVP01_0905800_-1	0.107069
AMRU_Ao_CGTCAGGGTACGAAAT	AMRU	Ao	5834	PvP01_09_v1_685_-_PVP01_0905800_-1	1.90032
AMRU_Ao_CGTCAGGGTTCGAATC	AMRU	Ao	1916	PvP01_09_v1_685_-_PVP01_0905800_-1	0
AMRU_Ao_CGTCCATAGAACTGTA	AMRU	Ao	4492	PvP01_09_v1_685_-_PVP01_0905800_-1	0.368868
AMRU_Ao_CGTCCATAGGTGCACA	AMRU	Ao	5466	PvP01_09_v1_685_-_PVP01_0905800_-1	0.43592
AMRU_Ao_CGTCCATCAAGTTAAG	AMRU	Ao	3965	PvP01_09_v1_685_-_PVP01_0905800_-1	0.19622
AMRU_Ao_CGTCCATGTGTTTGGT	AMRU	Ao	3772	PvP01_09_v1_685_-_PVP01_0905800_-1	0.124782
AMRU_Ao_CGTCTACAGAGTAAGG	AMRU	Ao	4883	PvP01_09_v1_685_-_PVP01_0905800_-1	0.191939
AMRU_Ao_CGTCTACCAAGCGAGT	AMRU	Ao	1907	PvP01_09_v1_685_-_PVP01_0905800_-1	0
AMRU_Ao_CGTGAGCAGTCTCGGC	AMRU	Ao	8524	PvP01_09_v1_685_-_PVP01_0905800_-1	0.0237897
AMRU_Ao_CGTGAGCAGTGCGTGA	AMRU	Ao	2223	PvP01_09_v1_685_-_PVP01_0905800_-1	0
AMRU_Ao_CGTGAGCGTATCTGCA	AMRU	Ao	2870	PvP01_09_v1_685_-_PVP01_0905800_-1	0.249464
AMRU_Ao_CGTGAGCGTGCATCTA	AMRU	Ao	72	PvP01_09_v1_685_-_PVP01_0905800_-1	0.303122
AMRU_Ao_CGTGAGCTCCTTGCCA	AMRU	Ao	4290	PvP01_09_v1_685_-_PVP01_0905800_-1	0.353967
AMRU_Ao_CGTGTAAAGTGCCAGA	AMRU	Ao	6183	PvP01_09_v1_685_-_PVP01_0905800_-1	0.549904
AMRU_Ao_CGTGTAAGTCAGAATA	AMRU	Ao	4727	PvP01_09_v1_685_-_PVP01_0905800_-1	0.354212
AMRU_Ao_CGTGTCTTCCAAATGC	AMRU	Ao	4820	PvP01_09_v1_685_-_PVP01_0905800_-1	0.396488
AMRU_Ao_CGTTAGAAGGACGAAA	AMRU	Ao	4124	PvP01_09_v1_685_-_PVP01_0905800_-1	0.152253
AMRU_Ao_CGTTAGATCACCATAG	AMRU	Ao	2913	PvP01_09_v1_685_-_PVP01_0905800_-1	0.412967
AMRU_Ao_CGTTCTGCAGTACACT	AMRU	Ao	8867	PvP01_09_v1_685_-_PVP01_0905800_-1	0.193095
AMRU_Ao_CGTTGGGCACTTAAGC	AMRU	Ao	4963	PvP01_09_v1_685_-_PVP01_0905800_-1	0
AMRU_Ao_CGTTGGGGTCCCGACA	AMRU	Ao	8193	PvP01_09_v1_685_-_PVP01_0905800_-1	0.0229516
AMRU_Ao_CGTTGGGTCACCGGGT	AMRU	Ao	8902	PvP01_09_v1_685_-_PVP01_0905800_-1	0.104575
AMRU_Ao_CTAACTTCAAACAACA	AMRU	Ao	4261	PvP01_09_v1_685_-_PVP01_0905800_-1	0
AMRU_Ao_CTAACTTCACGTCTCT	AMRU	Ao	8162	PvP01_09_v1_685_-_PVP01_0905800_-1	0.211193
AMRU_Ao_CTAACTTCACTTCTGC	AMRU	Ao	1877	PvP01_09_v1_685_-_PVP01_0905800_-1	0
AMRU_Ao_CTAAGACGTAGGCTGA	AMRU	Ao	8765	PvP01_09_v1_685_-_PVP01_0905800_-1	0.0316006
AMRU_Ao_CTAATGGAGATATGCA	AMRU	Ao	7803	PvP01_09_v1_685_-_PVP01_0905800_-1	0.201762
AMRU_Ao_CTAATGGCAGATGGCA	AMRU	Ao	8662	PvP01_09_v1_685_-_PVP01_0905800_-1	0.125211
AMRU_Ao_CTAATGGCAGGGTTAG	AMRU	Ao	2442	PvP01_09_v1_685_-_PVP01_0905800_-1	0.0742997
AMRU_Ao_CTAATGGGTAGCTCCG	AMRU	Ao	7809	PvP01_09_v1_685_-_PVP01_0905800_-1	0
AMRU_Ao_CTAATGGTCTCTTATG	AMRU	Ao	8847	PvP01_09_v1_685_-_PVP01_0905800_-1	0.287411
AMRU_Ao_CTACACCCACCGAATT	AMRU	Ao	3594	PvP01_09_v1_685_-_PVP01_0905800_-1	0.122429
AMRU_Ao_CTACACCCACTATCTT	AMRU	Ao	3792	PvP01_09_v1_685_-_PVP01_0905800_-1	0.340281
AMRU_Ao_CTACATTAGTGCCAGA	AMRU	Ao	4028	PvP01_09_v1_685_-_PVP01_0905800_-1	0.993281
AMRU_Ao_CTACATTCAAGCCTAT	AMRU	Ao	2757	PvP01_09_v1_685_-_PVP01_0905800_-1	0.217992
AMRU_Ao_CTACATTCACAGTCGC	AMRU	Ao	3879	PvP01_09_v1_685_-_PVP01_0905800_-1	0.388048
AMRU_Ao_CTACATTGTCTGATTG	AMRU	Ao	6271	PvP01_09_v1_685_-_PVP01_0905800_-1	1.07307
AMRU_Ao_CTACATTTCACCTCGT	AMRU	Ao	8825	PvP01_09_v1_685_-_PVP01_0905800_-1	0.264638
AMRU_Ao_CTACATTTCAGCTGGC	AMRU	Ao	3095	PvP01_09_v1_685_-_PVP01_0905800_-1	0.516662
AMRU_Ao_CTACCCAAGATGAGAG	AMRU	Ao	2097	PvP01_09_v1_685_-_PVP01_0905800_-1	0.247586
AMRU_Ao_CTACCCACAAGACACG	AMRU	Ao	3905	PvP01_09_v1_685_-_PVP01_0905800_-1	0.370199
AMRU_Ao_CTACCCATCACCAGGC	AMRU	Ao	7351	PvP01_09_v1_685_-_PVP01_0905800_-1	0
AMRU_Ao_CTACCCATCATTCACT	AMRU	Ao	3759	PvP01_09_v1_685_-_PVP01_0905800_-1	0
AMRU_Ao_CTACGTCAGTTATCGC	AMRU	Ao	7094	PvP01_09_v1_685_-_PVP01_0905800_-1	0.310463
AMRU_Ao_CTACGTCCACAACTGT	AMRU	Ao	4918	PvP01_09_v1_685_-_PVP01_0905800_-1	1.29496
AMRU_Ao_CTACGTCGTTCAGCGC	AMRU	Ao	8177	PvP01_09_v1_685_-_PVP01_0905800_-1	0.0737518
AMRU_Ao_CTACGTCGTTGCCTCT	AMRU	Ao	1545	PvP01_09_v1_685_-_PVP01_0905800_-1	0.0784252
AMRU_Ao_CTACGTCTCGTAGGTT	AMRU	Ao	3717	PvP01_09_v1_685_-_PVP01_0905800_-1	0.25965
AMRU_Ao_CTAGAGTGTCCGTGAC	AMRU	Ao	7354	PvP01_09_v1_685_-_PVP01_0905800_-1	0
AMRU_Ao_CTAGCCTAGCCAGTAG	AMRU	Ao	3824	PvP01_09_v1_685_-_PVP01_0905800_-1	0.212461
AMRU_Ao_CTAGCCTAGTACCGGA	AMRU	Ao	7816	PvP01_09_v1_685_-_PVP01_0905800_-1	0.12283
AMRU_Ao_CTAGCCTCAGCGTTCG	AMRU	Ao	5557	PvP01_09_v1_685_-_PVP01_0905800_-1	0.71722
AMRU_Ao_CTAGCCTTCTTGTATC	AMRU	Ao	200	PvP01_09_v1_685_-_PVP01_0905800_-1	0
AMRU_Ao_CTAGTGAAGAGAGCTC	AMRU	Ao	4217	PvP01_09_v1_685_-_PVP01_0905800_-1	0
AMRU_Ao_CTAGTGAAGATGCCTT	AMRU	Ao	4143	PvP01_09_v1_685_-_PVP01_0905800_-1	0.0537808
AMRU_Ao_CTAGTGACAGCTGTAT	AMRU	Ao	3428	PvP01_09_v1_685_-_PVP01_0905800_-1	0.484707
AMRU_Ao_CTAGTGATCACTGGGC	AMRU	Ao	2583	PvP01_09_v1_685_-_PVP01_0905800_-1	0
AMRU_Ao_CTAGTGATCTGTCCGT	AMRU	Ao	4419	PvP01_09_v1_685_-_PVP01_0905800_-1	0.0751823
AMRU_Ao_CTCACACCAGCCTATA	AMRU	Ao	3748	PvP01_09_v1_685_-_PVP01_0905800_-1	0.213732
AMRU_Ao_CTCAGAAAGAGGGCTT	AMRU	Ao	8315	PvP01_09_v1_685_-_PVP01_0905800_-1	0
AMRU_Ao_CTCAGAAAGGTGCAAC	AMRU	Ao	8811	PvP01_09_v1_685_-_PVP01_0905800_-1	0.148002
AMRU_Ao_CTCAGAACAACGATCT	AMRU	Ao	3324	PvP01_09_v1_685_-_PVP01_0905800_-1	0.811935
AMRU_Ao_CTCAGAACATCTCCCA	AMRU	Ao	8236	PvP01_09_v1_685_-_PVP01_0905800_-1	0.0704457
AMRU_Ao_CTCAGAACATCTCGCT	AMRU	Ao	3640	PvP01_09_v1_685_-_PVP01_0905800_-1	0.582508
AMRU_Ao_CTCAGAAGTAAGTTCC	AMRU	Ao	3894	PvP01_09_v1_685_-_PVP01_0905800_-1	0.152664
AMRU_Ao_CTCAGAAGTAGCGTCC	AMRU	Ao	9163	PvP01_09_v1_685_-_PVP01_0905800_-1	0
AMRU_Ao_CTCAGAAGTGAGTGAC	AMRU	Ao	2443	PvP01_09_v1_685_-_PVP01_0905800_-1	0.054404
AMRU_Ao_CTCATTACAACGATCT	AMRU	Ao	6127	PvP01_09_v1_685_-_PVP01_0905800_-1	1.51601
AMRU_Ao_CTCATTACAGTTCATG	AMRU	Ao	8658	PvP01_09_v1_685_-_PVP01_0905800_-1	0.0691292
AMRU_Ao_CTCATTAGTACAGACG	AMRU	Ao	3912	PvP01_09_v1_685_-_PVP01_0905800_-1	0.0482137
AMRU_Ao_CTCATTATCCGCGTTT	AMRU	Ao	3311	PvP01_09_v1_685_-_PVP01_0905800_-1	0.535014
AMRU_Ao_CTCATTATCGGAAATA	AMRU	Ao	1272	PvP01_09_v1_685_-_PVP01_0905800_-1	0
AMRU_Ao_CTCCTAGCAAATACAG	AMRU	Ao	8022	PvP01_09_v1_685_-_PVP01_0905800_-1	0.136847
AMRU_Ao_CTCCTAGGTCCGAACC	AMRU	Ao	3926	PvP01_09_v1_685_-_PVP01_0905800_-1	0.0854701
AMRU_Ao_CTCCTAGTCACTTCAT	AMRU	Ao	8579	PvP01_09_v1_685_-_PVP01_0905800_-1	0.469187
AMRU_Ao_CTCCTAGTCGTTGACA	AMRU	Ao	5326	PvP01_09_v1_685_-_PVP01_0905800_-1	0.353038
AMRU_Ao_CTCGAAACAATGTAAG	AMRU	Ao	8330	PvP01_09_v1_685_-_PVP01_0905800_-1	0.0279096
AMRU_Ao_CTCGAAACACAGTCGC	AMRU	Ao	5507	PvP01_09_v1_685_-_PVP01_0905800_-1	0.656431
AMRU_Ao_CTCGAAATCGATCCCT	AMRU	Ao	2993	PvP01_09_v1_685_-_PVP01_0905800_-1	0.841251
AMRU_Ao_CTCGAGGGTGAACCTT	AMRU	Ao	6655	PvP01_09_v1_685_-_PVP01_0905800_-1	0.525085
AMRU_Ao_CTCGAGGGTTGGAGGT	AMRU	Ao	3685	PvP01_09_v1_685_-_PVP01_0905800_-1	0.200904
AMRU_Ao_CTCGAGGTCAGTTAGC	AMRU	Ao	1455	PvP01_09_v1_685_-_PVP01_0905800_-1	0.146692
AMRU_Ao_CTCGGAGAGGCAATTA	AMRU	Ao	5919	PvP01_09_v1_685_-_PVP01_0905800_-1	0.784573
AMRU_Ao_CTCGGAGGTAGCGCTC	AMRU	Ao	2301	PvP01_09_v1_685_-_PVP01_0905800_-1	0
AMRU_Ao_CTCGGAGGTTTGGGCC	AMRU	Ao	5393	PvP01_09_v1_685_-_PVP01_0905800_-1	0.144252
AMRU_Ao_CTCGGGATCGCGGATC	AMRU	Ao	7219	PvP01_09_v1_685_-_PVP01_0905800_-1	0
AMRU_Ao_CTCGTACAGGGAAACA	AMRU	Ao	8490	PvP01_09_v1_685_-_PVP01_0905800_-1	0.0406174
AMRU_Ao_CTCGTACCACAACGCC	AMRU	Ao	1486	PvP01_09_v1_685_-_PVP01_0905800_-1	0
AMRU_Ao_CTCGTCAGTTCGGGCT	AMRU	Ao	3448	PvP01_09_v1_685_-_PVP01_0905800_-1	0.480423
AMRU_Ao_CTCGTCATCCTCTAGC	AMRU	Ao	3633	PvP01_09_v1_685_-_PVP01_0905800_-1	0.213972
AMRU_Ao_CTCGTCATCGCTAGCG	AMRU	Ao	4278	PvP01_09_v1_685_-_PVP01_0905800_-1	0
AMRU_Ao_CTCTAATAGCAATATG	AMRU	Ao	9064	PvP01_09_v1_685_-_PVP01_0905800_-1	0.087512
AMRU_Ao_CTCTAATAGTAGCGGT	AMRU	Ao	5803	PvP01_09_v1_685_-_PVP01_0905800_-1	0.377725
AMRU_Ao_CTCTAATGTCCAGTAT	AMRU	Ao	8866	PvP01_09_v1_685_-_PVP01_0905800_-1	0.21165
AMRU_Ao_CTCTACGAGACTGTAA	AMRU	Ao	19	PvP01_09_v1_685_-_PVP01_0905800_-1	0
AMRU_Ao_CTCTACGCAAAGGCGT	AMRU	Ao	215	PvP01_09_v1_685_-_PVP01_0905800_-1	0
AMRU_Ao_CTCTACGCAATGTTGC	AMRU	Ao	3918	PvP01_09_v1_685_-_PVP01_0905800_-1	0
AMRU_Ao_CTCTACGGTAGGCATG	AMRU	Ao	3615	PvP01_09_v1_685_-_PVP01_0905800_-1	0.238152
AMRU_Ao_CTCTGGTCAGTGGGAT	AMRU	Ao	4993	PvP01_09_v1_685_-_PVP01_0905800_-1	0.74638
AMRU_Ao_CTGAAACAGTCATCCA	AMRU	Ao	16	PvP01_09_v1_685_-_PVP01_0905800_-1	0
AMRU_Ao_CTGAAACAGTTAACGA	AMRU	Ao	2729	PvP01_09_v1_685_-_PVP01_0905800_-1	0.192715
AMRU_Ao_CTGAAACCACGAAGCA	AMRU	Ao	4595	PvP01_09_v1_685_-_PVP01_0905800_-1	0.0335087
AMRU_Ao_CTGAAACCAGCTGTGC	AMRU	Ao	3329	PvP01_09_v1_685_-_PVP01_0905800_-1	0.278924
AMRU_Ao_CTGAAACCAGTCGATT	AMRU	Ao	4196	PvP01_09_v1_685_-_PVP01_0905800_-1	0.275217
AMRU_Ao_CTGAAACGTCAGATAA	AMRU	Ao	5775	PvP01_09_v1_685_-_PVP01_0905800_-1	0.863422
AMRU_Ao_CTGAAACTCGGGAGTA	AMRU	Ao	3506	PvP01_09_v1_685_-_PVP01_0905800_-1	0.241138
AMRU_Ao_CTGAAGTCACACCGAC	AMRU	Ao	4219	PvP01_09_v1_685_-_PVP01_0905800_-1	0.801817
AMRU_Ao_CTGAAGTCACAGCCCA	AMRU	Ao	4658	PvP01_09_v1_685_-_PVP01_0905800_-1	1.36274
AMRU_Ao_CTGAAGTTCACTGGGC	AMRU	Ao	6278	PvP01_09_v1_685_-_PVP01_0905800_-1	1.09103
AMRU_Ao_CTGATAGAGATATGCA	AMRU	Ao	4460	PvP01_09_v1_685_-_PVP01_0905800_-1	0.823342
AMRU_Ao_CTGATAGAGCTCCTTC	AMRU	Ao	6000	PvP01_09_v1_685_-_PVP01_0905800_-1	0.763081
AMRU_Ao_CTGATAGGTACGCACC	AMRU	Ao	5581	PvP01_09_v1_685_-_PVP01_0905800_-1	0.704767
AMRU_Ao_CTGATAGGTATTCGTG	AMRU	Ao	5097	PvP01_09_v1_685_-_PVP01_0905800_-1	2.33694
AMRU_Ao_CTGATCCGTAACGACG	AMRU	Ao	5788	PvP01_09_v1_685_-_PVP01_0905800_-1	0.677813
AMRU_Ao_CTGATCCGTACGCTGC	AMRU	Ao	8551	PvP01_09_v1_685_-_PVP01_0905800_-1	0
AMRU_Ao_CTGATCCGTTGAACTC	AMRU	Ao	3499	PvP01_09_v1_685_-_PVP01_0905800_-1	0.724256
AMRU_Ao_CTGATCCTCTGCTGTC	AMRU	Ao	6405	PvP01_09_v1_685_-_PVP01_0905800_-1	0.618255
AMRU_Ao_CTGCCTAAGCACCGCT	AMRU	Ao	2899	PvP01_09_v1_685_-_PVP01_0905800_-1	0.270905
AMRU_Ao_CTGCCTAAGCTGCAAG	AMRU	Ao	4265	PvP01_09_v1_685_-_PVP01_0905800_-1	0.142146
AMRU_Ao_CTGCCTACAGGCTGAA	AMRU	Ao	3653	PvP01_09_v1_685_-_PVP01_0905800_-1	0.0443794
AMRU_Ao_CTGCGGAAGAATTCCC	AMRU	Ao	3922	PvP01_09_v1_685_-_PVP01_0905800_-1	0.568893
AMRU_Ao_CTGCTGTGTATAGGGC	AMRU	Ao	3476	PvP01_09_v1_685_-_PVP01_0905800_-1	0.158718
AMRU_Ao_CTGCTGTGTATGGTTC	AMRU	Ao	8591	PvP01_09_v1_685_-_PVP01_0905800_-1	0.0720617
AMRU_Ao_CTGCTGTTCGTGGACC	AMRU	Ao	8574	PvP01_09_v1_685_-_PVP01_0905800_-1	0.0294525
AMRU_Ao_CTGGTCTCACCCTATC	AMRU	Ao	4227	PvP01_09_v1_685_-_PVP01_0905800_-1	0.344777
AMRU_Ao_CTGGTCTGTCGTCTTC	AMRU	Ao	2984	PvP01_09_v1_685_-_PVP01_0905800_-1	0.346765
AMRU_Ao_CTGTGCTAGGCACATG	AMRU	Ao	6612	PvP01_09_v1_685_-_PVP01_0905800_-1	0.473732
AMRU_Ao_CTGTGCTAGTTAAGTG	AMRU	Ao	12	PvP01_09_v1_685_-_PVP01_0905800_-1	0
AMRU_Ao_CTGTGCTGTGGCAAAC	AMRU	Ao	3930	PvP01_09_v1_685_-_PVP01_0905800_-1	0.328997
AMRU_Ao_CTGTGCTTCGGAGCAA	AMRU	Ao	2577	PvP01_09_v1_685_-_PVP01_0905800_-1	0
AMRU_Ao_CTGTTTAAGTCTCGGC	AMRU	Ao	3451	PvP01_09_v1_685_-_PVP01_0905800_-1	0
AMRU_Ao_CTGTTTACAGCTCCGA	AMRU	Ao	3129	PvP01_09_v1_685_-_PVP01_0905800_-1	0.186021
AMRU_Ao_CTGTTTAGTATGAAAC	AMRU	Ao	5751	PvP01_09_v1_685_-_PVP01_0905800_-1	1.69185
AMRU_Ao_CTGTTTAGTCTAGAGG	AMRU	Ao	3884	PvP01_09_v1_685_-_PVP01_0905800_-1	1.07594
AMRU_Ao_CTGTTTAGTGCCTTGG	AMRU	Ao	3706	PvP01_09_v1_685_-_PVP01_0905800_-1	0.249465
AMRU_Ao_CTGTTTATCCGGGTGT	AMRU	Ao	3523	PvP01_09_v1_685_-_PVP01_0905800_-1	0
AMRU_Ao_CTGTTTATCTGCAGTA	AMRU	Ao	3315	PvP01_09_v1_685_-_PVP01_0905800_-1	0.385802
AMRU_Ao_CTTAACTAGAGCTGGT	AMRU	Ao	1118	PvP01_09_v1_685_-_PVP01_0905800_-1	0.0613685
AMRU_Ao_CTTAACTTCACATGCA	AMRU	Ao	8320	PvP01_09_v1_685_-_PVP01_0905800_-1	0.0647207
AMRU_Ao_CTTAACTTCTACTATC	AMRU	Ao	6895	PvP01_09_v1_685_-_PVP01_0905800_-1	0.0827061
AMRU_Ao_CTTACCGAGCCGCCTA	AMRU	Ao	1987	PvP01_09_v1_685_-_PVP01_0905800_-1	0.31252
AMRU_Ao_CTTACCGCACTCAGGC	AMRU	Ao	4762	PvP01_09_v1_685_-_PVP01_0905800_-1	0.65776
AMRU_Ao_CTTACCGTCACAATGC	AMRU	Ao	4667	PvP01_09_v1_685_-_PVP01_0905800_-1	0.31839
AMRU_Ao_CTTACCGTCCCTGACT	AMRU	Ao	3731	PvP01_09_v1_685_-_PVP01_0905800_-1	0.404404
AMRU_Ao_CTTAGGATCTTCTGGC	AMRU	Ao	5785	PvP01_09_v1_685_-_PVP01_0905800_-1	1.17046
AMRU_Ao_CTTCTCTGTAGAGCTG	AMRU	Ao	5269	PvP01_09_v1_685_-_PVP01_0905800_-1	0.626022
AMRU_Ao_CTTCTCTGTGTCAATC	AMRU	Ao	6639	PvP01_09_v1_685_-_PVP01_0905800_-1	0.0741455
AMRU_Ao_CTTGGCTAGACGACGT	AMRU	Ao	7226	PvP01_09_v1_685_-_PVP01_0905800_-1	0
AMRU_Ao_CTTGGCTAGTCCATAC	AMRU	Ao	8817	PvP01_09_v1_685_-_PVP01_0905800_-1	0.165786
AMRU_Ao_CTTGGCTCAACTGCGC	AMRU	Ao	2309	PvP01_09_v1_685_-_PVP01_0905800_-1	0.0506663
AMRU_Ao_CTTGGCTGTAGTACCT	AMRU	Ao	2405	PvP01_09_v1_685_-_PVP01_0905800_-1	0
AMRU_Ao_CTTGGCTGTCGAATCT	AMRU	Ao	2703	PvP01_09_v1_685_-_PVP01_0905800_-1	0.215343
AMRU_Ao_CTTGGCTGTCGACTAT	AMRU	Ao	2151	PvP01_09_v1_685_-_PVP01_0905800_-1	0
AMRU_Ao_CTTGGCTGTTAAAGAC	AMRU	Ao	5498	PvP01_09_v1_685_-_PVP01_0905800_-1	0.702412
AMRU_Ao_CTTGGCTTCAGTTTGG	AMRU	Ao	801	PvP01_09_v1_685_-_PVP01_0905800_-1	0.156055
AMRU_Ao_CTTGGCTTCCGTTGTC	AMRU	Ao	4686	PvP01_09_v1_685_-_PVP01_0905800_-1	0.539877
AMRU_Ao_CTTTGCGAGTGTCCAT	AMRU	Ao	3504	PvP01_09_v1_685_-_PVP01_0905800_-1	0.0975467
AMRU_Ao_CTTTGCGCAGTGACAG	AMRU	Ao	5239	PvP01_09_v1_685_-_PVP01_0905800_-1	0.597411
AMRU_Ao_CTTTGCGGTAATTGGA	AMRU	Ao	5023	PvP01_09_v1_685_-_PVP01_0905800_-1	0.328926
AMRU_Ao_CTTTGCGTCTCTGCTG	AMRU	Ao	7120	PvP01_09_v1_685_-_PVP01_0905800_-1	0
AMRU_Ao_GAAACTCAGAGGTAGA	AMRU	Ao	3430	PvP01_09_v1_685_-_PVP01_0905800_-1	0.142322
AMRU_Ao_GAAACTCAGTACGATA	AMRU	Ao	8548	PvP01_09_v1_685_-_PVP01_0905800_-1	0.13169
AMRU_Ao_GAAACTCAGTGTCCAT	AMRU	Ao	4906	PvP01_09_v1_685_-_PVP01_0905800_-1	0.0982946
AMRU_Ao_GAAACTCCACACATGT	AMRU	Ao	4006	PvP01_09_v1_685_-_PVP01_0905800_-1	0.208777
AMRU_Ao_GAAACTCGTCGCGGTT	AMRU	Ao	3530	PvP01_09_v1_685_-_PVP01_0905800_-1	0.213493
AMRU_Ao_GAAACTCGTTAAGATG	AMRU	Ao	2607	PvP01_09_v1_685_-_PVP01_0905800_-1	0.2145
AMRU_Ao_GAAATGACACAGGTTT	AMRU	Ao	4954	PvP01_09_v1_685_-_PVP01_0905800_-1	1.03281
AMRU_Ao_GAAATGACAGATTGCT	AMRU	Ao	3147	PvP01_09_v1_685_-_PVP01_0905800_-1	0.397614
AMRU_Ao_GAAATGAGTACAGCAG	AMRU	Ao	3969	PvP01_09_v1_685_-_PVP01_0905800_-1	0.116279
AMRU_Ao_GAAATGATCGTGACAT	AMRU	Ao	3855	PvP01_09_v1_685_-_PVP01_0905800_-1	0.372949
AMRU_Ao_GAACATCAGAAGGGTA	AMRU	Ao	124	PvP01_09_v1_685_-_PVP01_0905800_-1	0
AMRU_Ao_GAACATCAGGATCGCA	AMRU	Ao	2039	PvP01_09_v1_685_-_PVP01_0905800_-1	0.0471921
AMRU_Ao_GAACATCCAGTATGCT	AMRU	Ao	2220	PvP01_09_v1_685_-_PVP01_0905800_-1	0.373772
AMRU_Ao_GAACATCGTCCCTTGT	AMRU	Ao	8915	PvP01_09_v1_685_-_PVP01_0905800_-1	0
AMRU_Ao_GAACATCTCGCCAAAT	AMRU	Ao	5021	PvP01_09_v1_685_-_PVP01_0905800_-1	1.10783
AMRU_Ao_GAACCTAAGCCTATGT	AMRU	Ao	5329	PvP01_09_v1_685_-_PVP01_0905800_-1	0.157245
AMRU_Ao_GAACCTACAAAGAATC	AMRU	Ao	4604	PvP01_09_v1_685_-_PVP01_0905800_-1	0.527744
AMRU_Ao_GAACCTACAAGTCTGT	AMRU	Ao	3373	PvP01_09_v1_685_-_PVP01_0905800_-1	0.520833
AMRU_Ao_GAACCTACATGCTAGT	AMRU	Ao	6466	PvP01_09_v1_685_-_PVP01_0905800_-1	0.466014
AMRU_Ao_GAACGGAAGTTCGATC	AMRU	Ao	6666	PvP01_09_v1_685_-_PVP01_0905800_-1	0.583317
AMRU_Ao_GAACGGACAAGCCCAC	AMRU	Ao	1022	PvP01_09_v1_685_-_PVP01_0905800_-1	0
AMRU_Ao_GAACGGACAAGGTTCT	AMRU	Ao	8430	PvP01_09_v1_685_-_PVP01_0905800_-1	0.0229421
AMRU_Ao_GAACGGACACAGGTTT	AMRU	Ao	5020	PvP01_09_v1_685_-_PVP01_0905800_-1	0.239425
AMRU_Ao_GAACGGAGTGAGTGAC	AMRU	Ao	4589	PvP01_09_v1_685_-_PVP01_0905800_-1	0.484992
AMRU_Ao_GAAGCAGAGACTCGGA	AMRU	Ao	4706	PvP01_09_v1_685_-_PVP01_0905800_-1	0.970423
AMRU_Ao_GAAGCAGAGGCGTACA	AMRU	Ao	1614	PvP01_09_v1_685_-_PVP01_0905800_-1	0.335196
AMRU_Ao_GAAGCAGAGTGGTAGC	AMRU	Ao	6202	PvP01_09_v1_685_-_PVP01_0905800_-1	1.17133
AMRU_Ao_GAAGCAGCACTGTTAG	AMRU	Ao	1326	PvP01_09_v1_685_-_PVP01_0905800_-1	0
AMRU_Ao_GAAGCAGCAGTCACTA	AMRU	Ao	2961	PvP01_09_v1_685_-_PVP01_0905800_-1	0
AMRU_Ao_GAAGCAGTCAGCTCTC	AMRU	Ao	8522	PvP01_09_v1_685_-_PVP01_0905800_-1	0
AMRU_Ao_GAAGCAGTCTTGACGA	AMRU	Ao	5086	PvP01_09_v1_685_-_PVP01_0905800_-1	1.5646
AMRU_Ao_GAATAAGGTACTCAAC	AMRU	Ao	5022	PvP01_09_v1_685_-_PVP01_0905800_-1	0.763109
AMRU_Ao_GAATAAGGTAGCAAAT	AMRU	Ao	9158	PvP01_09_v1_685_-_PVP01_0905800_-1	0.204876
AMRU_Ao_GAATGAAAGCTCCTCT	AMRU	Ao	6977	PvP01_09_v1_685_-_PVP01_0905800_-1	0
AMRU_Ao_GAATGAAAGTGGTAAT	AMRU	Ao	1626	PvP01_09_v1_685_-_PVP01_0905800_-1	0.0633914
AMRU_Ao_GAATGAACACGGATAG	AMRU	Ao	4974	PvP01_09_v1_685_-_PVP01_0905800_-1	0.227247
AMRU_Ao_GAATGAACATCCAACA	AMRU	Ao	7300	PvP01_09_v1_685_-_PVP01_0905800_-1	0.120613
AMRU_Ao_GAATGAATCACAACGT	AMRU	Ao	2871	PvP01_09_v1_685_-_PVP01_0905800_-1	0
AMRU_Ao_GACACGCAGGCGATAC	AMRU	Ao	2077	PvP01_09_v1_685_-_PVP01_0905800_-1	0.156994
AMRU_Ao_GACACGCCATGCCCGA	AMRU	Ao	2504	PvP01_09_v1_685_-_PVP01_0905800_-1	0
AMRU_Ao_GACACGCCATTACCTT	AMRU	Ao	8255	PvP01_09_v1_685_-_PVP01_0905800_-1	0.197733
AMRU_Ao_GACACGCGTTACAGAA	AMRU	Ao	8676	PvP01_09_v1_685_-_PVP01_0905800_-1	0.0841279
AMRU_Ao_GACACGCTCGCCTGAG	AMRU	Ao	832	PvP01_09_v1_685_-_PVP01_0905800_-1	0
AMRU_Ao_GACAGAGTCGTACCGG	AMRU	Ao	4162	PvP01_09_v1_685_-_PVP01_0905800_-1	0.130839
AMRU_Ao_GACCAATCACGAAACG	AMRU	Ao	2589	PvP01_09_v1_685_-_PVP01_0905800_-1	0.299742
AMRU_Ao_GACCAATCATGTAAGA	AMRU	Ao	4621	PvP01_09_v1_685_-_PVP01_0905800_-1	0.0807233
AMRU_Ao_GACCAATGTAGCGTAG	AMRU	Ao	3754	PvP01_09_v1_685_-_PVP01_0905800_-1	0.375375
AMRU_Ao_GACCTGGAGACAAGCC	AMRU	Ao	5078	PvP01_09_v1_685_-_PVP01_0905800_-1	0.300631
AMRU_Ao_GACCTGGAGACATAAC	AMRU	Ao	8766	PvP01_09_v1_685_-_PVP01_0905800_-1	0.14112
AMRU_Ao_GACCTGGAGCGACGTA	AMRU	Ao	4079	PvP01_09_v1_685_-_PVP01_0905800_-1	0.0966791
AMRU_Ao_GACCTGGAGTGGTAAT	AMRU	Ao	4358	PvP01_09_v1_685_-_PVP01_0905800_-1	0
AMRU_Ao_GACCTGGGTATAAACG	AMRU	Ao	4777	PvP01_09_v1_685_-_PVP01_0905800_-1	0.199243
AMRU_Ao_GACCTGGGTTGCCTCT	AMRU	Ao	8149	PvP01_09_v1_685_-_PVP01_0905800_-1	0.296877
AMRU_Ao_GACGCGTGTCGGATCC	AMRU	Ao	8667	PvP01_09_v1_685_-_PVP01_0905800_-1	0.75662
AMRU_Ao_GACGCGTGTGAAAGAG	AMRU	Ao	5065	PvP01_09_v1_685_-_PVP01_0905800_-1	0.586304
AMRU_Ao_GACGCGTGTGATAAGT	AMRU	Ao	8672	PvP01_09_v1_685_-_PVP01_0905800_-1	0.110482
AMRU_Ao_GACGCGTTCATCTGTT	AMRU	Ao	4180	PvP01_09_v1_685_-_PVP01_0905800_-1	0
AMRU_Ao_GACGGCTAGGGATGGG	AMRU	Ao	8715	PvP01_09_v1_685_-_PVP01_0905800_-1	0.262151
AMRU_Ao_GACGGCTAGGTCGGAT	AMRU	Ao	8353	PvP01_09_v1_685_-_PVP01_0905800_-1	0.0529829
AMRU_Ao_GACGGCTAGTGGACGT	AMRU	Ao	2448	PvP01_09_v1_685_-_PVP01_0905800_-1	0.264178
AMRU_Ao_GACGGCTCACATCTTT	AMRU	Ao	5562	PvP01_09_v1_685_-_PVP01_0905800_-1	1.83781
AMRU_Ao_GACGGCTTCCGCAAGC	AMRU	Ao	3546	PvP01_09_v1_685_-_PVP01_0905800_-1	0.501379
AMRU_Ao_GACGGCTTCTGGTATG	AMRU	Ao	8629	PvP01_09_v1_685_-_PVP01_0905800_-1	0.0822639
AMRU_Ao_GACGTGCAGTGAAGTT	AMRU	Ao	3412	PvP01_09_v1_685_-_PVP01_0905800_-1	0.597292
AMRU_Ao_GACGTGCCATTGTGCA	AMRU	Ao	2359	PvP01_09_v1_685_-_PVP01_0905800_-1	0.617366
AMRU_Ao_GACGTGCGTACACCGC	AMRU	Ao	4685	PvP01_09_v1_685_-_PVP01_0905800_-1	0.225632
AMRU_Ao_GACGTGCTCAGAGGTG	AMRU	Ao	8857	PvP01_09_v1_685_-_PVP01_0905800_-1	0.0834678
AMRU_Ao_GACGTTACAAGGTTTC	AMRU	Ao	2752	PvP01_09_v1_685_-_PVP01_0905800_-1	0
AMRU_Ao_GACGTTACAATGGATA	AMRU	Ao	1898	PvP01_09_v1_685_-_PVP01_0905800_-1	0.114883
AMRU_Ao_GACGTTATCACCCTCA	AMRU	Ao	4770	PvP01_09_v1_685_-_PVP01_0905800_-1	0.444534
AMRU_Ao_GACGTTATCCTGCTTG	AMRU	Ao	1885	PvP01_09_v1_685_-_PVP01_0905800_-1	0.552384
AMRU_Ao_GACGTTATCTGAGGGA	AMRU	Ao	688	PvP01_09_v1_685_-_PVP01_0905800_-1	0
AMRU_Ao_GACGTTATCTGCCAGG	AMRU	Ao	3593	PvP01_09_v1_685_-_PVP01_0905800_-1	0.35759
AMRU_Ao_GACTAACAGGCAGGTT	AMRU	Ao	8423	PvP01_09_v1_685_-_PVP01_0905800_-1	0.0266064
AMRU_Ao_GACTAACAGGCTAGCA	AMRU	Ao	6997	PvP01_09_v1_685_-_PVP01_0905800_-1	0
AMRU_Ao_GACTAACCACGAAACG	AMRU	Ao	4225	PvP01_09_v1_685_-_PVP01_0905800_-1	0.114238
AMRU_Ao_GACTACAAGAAACGAG	AMRU	Ao	6607	PvP01_09_v1_685_-_PVP01_0905800_-1	0.218031
AMRU_Ao_GACTACAAGATTACCC	AMRU	Ao	954	PvP01_09_v1_685_-_PVP01_0905800_-1	0.518852
AMRU_Ao_GACTACATCAGGCAAG	AMRU	Ao	5916	PvP01_09_v1_685_-_PVP01_0905800_-1	1.01322
AMRU_Ao_GACTACATCCCAAGAT	AMRU	Ao	2389	PvP01_09_v1_685_-_PVP01_0905800_-1	0.068451
AMRU_Ao_GACTGCGAGCATGGCA	AMRU	Ao	3844	PvP01_09_v1_685_-_PVP01_0905800_-1	0.105252
AMRU_Ao_GACTGCGGTGCACCAC	AMRU	Ao	5450	PvP01_09_v1_685_-_PVP01_0905800_-1	0.435374
AMRU_Ao_GACTGCGTCCTGCCAT	AMRU	Ao	6933	PvP01_09_v1_685_-_PVP01_0905800_-1	0
AMRU_Ao_GAGCAGAAGAAGAAGC	AMRU	Ao	8377	PvP01_09_v1_685_-_PVP01_0905800_-1	0.0567956
AMRU_Ao_GAGCAGAAGTATTGGA	AMRU	Ao	7929	PvP01_09_v1_685_-_PVP01_0905800_-1	0.202771
AMRU_Ao_GAGCAGACAAGGACTG	AMRU	Ao	358	PvP01_09_v1_685_-_PVP01_0905800_-1	0
AMRU_Ao_GAGCAGACAATGGACG	AMRU	Ao	3472	PvP01_09_v1_685_-_PVP01_0905800_-1	0.674169
AMRU_Ao_GAGCAGATCAGAGCTT	AMRU	Ao	6546	PvP01_09_v1_685_-_PVP01_0905800_-1	0.201564
AMRU_Ao_GAGCAGATCGGTCCGA	AMRU	Ao	3100	PvP01_09_v1_685_-_PVP01_0905800_-1	0
AMRU_Ao_GAGGTGAAGAGTAAGG	AMRU	Ao	4415	PvP01_09_v1_685_-_PVP01_0905800_-1	0.703334
AMRU_Ao_GAGGTGAAGTGAACAT	AMRU	Ao	4751	PvP01_09_v1_685_-_PVP01_0905800_-1	0.838645
AMRU_Ao_GAGGTGACACTAAGTC	AMRU	Ao	8079	PvP01_09_v1_685_-_PVP01_0905800_-1	0.112265
AMRU_Ao_GAGGTGACAGACAGGT	AMRU	Ao	409	PvP01_09_v1_685_-_PVP01_0905800_-1	0
AMRU_Ao_GAGGTGAGTAGCGCAA	AMRU	Ao	5322	PvP01_09_v1_685_-_PVP01_0905800_-1	0.242895
AMRU_Ao_GAGGTGAGTCACCTAA	AMRU	Ao	3830	PvP01_09_v1_685_-_PVP01_0905800_-1	0.0434235
AMRU_Ao_GAGTCCGAGGTTACCT	AMRU	Ao	4303	PvP01_09_v1_685_-_PVP01_0905800_-1	0.22368
AMRU_Ao_GAGTCCGCAGCGTAAG	AMRU	Ao	2123	PvP01_09_v1_685_-_PVP01_0905800_-1	0
AMRU_Ao_GAGTCCGGTTCGGGCT	AMRU	Ao	8379	PvP01_09_v1_685_-_PVP01_0905800_-1	0.281843
AMRU_Ao_GATCAGTAGCATCATC	AMRU	Ao	6594	PvP01_09_v1_685_-_PVP01_0905800_-1	0.230023
AMRU_Ao_GATCAGTGTTAGGGTG	AMRU	Ao	7196	PvP01_09_v1_685_-_PVP01_0905800_-1	0
AMRU_Ao_GATCGATGTAGGACAC	AMRU	Ao	4472	PvP01_09_v1_685_-_PVP01_0905800_-1	0.147485
AMRU_Ao_GATCGCGGTTAAAGAC	AMRU	Ao	5755	PvP01_09_v1_685_-_PVP01_0905800_-1	2.61506
AMRU_Ao_GATCGCGTCCCGGATG	AMRU	Ao	7152	PvP01_09_v1_685_-_PVP01_0905800_-1	0
AMRU_Ao_GATCGTAAGTCATGCT	AMRU	Ao	5049	PvP01_09_v1_685_-_PVP01_0905800_-1	0.779461
AMRU_Ao_GATCGTACAAACCTAC	AMRU	Ao	8509	PvP01_09_v1_685_-_PVP01_0905800_-1	0.0599341
AMRU_Ao_GATCGTACAGGTCTCG	AMRU	Ao	4715	PvP01_09_v1_685_-_PVP01_0905800_-1	0.27784
AMRU_Ao_GATCGTAGTGAGGCTA	AMRU	Ao	7775	PvP01_09_v1_685_-_PVP01_0905800_-1	0.0473642
AMRU_Ao_GATCTAGCAAGTAATG	AMRU	Ao	1808	PvP01_09_v1_685_-_PVP01_0905800_-1	0.094697
AMRU_Ao_GATCTAGCAGTCGTGC	AMRU	Ao	4619	PvP01_09_v1_685_-_PVP01_0905800_-1	0.393804
AMRU_Ao_GATCTAGTCAAACGGG	AMRU	Ao	169	PvP01_09_v1_685_-_PVP01_0905800_-1	0
AMRU_Ao_GATCTAGTCTACCAGA	AMRU	Ao	8224	PvP01_09_v1_685_-_PVP01_0905800_-1	0.26294
AMRU_Ao_GATGAAACAATCTGCA	AMRU	Ao	7664	PvP01_09_v1_685_-_PVP01_0905800_-1	0
AMRU_Ao_GATGAAACAGACGTAG	AMRU	Ao	1261	PvP01_09_v1_685_-_PVP01_0905800_-1	0
AMRU_Ao_GATGAAAGTAAAGGAG	AMRU	Ao	3556	PvP01_09_v1_685_-_PVP01_0905800_-1	0.125497
AMRU_Ao_GATGAAAGTGAGTGAC	AMRU	Ao	1879	PvP01_09_v1_685_-_PVP01_0905800_-1	0.0986729
AMRU_Ao_GATGAAAGTTCGGGCT	AMRU	Ao	119	PvP01_09_v1_685_-_PVP01_0905800_-1	0
AMRU_Ao_GATGAAATCACTTACT	AMRU	Ao	3686	PvP01_09_v1_685_-_PVP01_0905800_-1	0.132639
AMRU_Ao_GATGAAATCGTCTGCT	AMRU	Ao	3288	PvP01_09_v1_685_-_PVP01_0905800_-1	0.105452
AMRU_Ao_GATGAAATCTATCCCG	AMRU	Ao	3360	PvP01_09_v1_685_-_PVP01_0905800_-1	0
AMRU_Ao_GATGAGGCAGACAAAT	AMRU	Ao	7	PvP01_09_v1_685_-_PVP01_0905800_-1	0.0845737
AMRU_Ao_GATGAGGCATATGCTG	AMRU	Ao	3393	PvP01_09_v1_685_-_PVP01_0905800_-1	0.0432563
AMRU_Ao_GATGAGGGTTAGTGGG	AMRU	Ao	3407	PvP01_09_v1_685_-_PVP01_0905800_-1	0
AMRU_Ao_GATGCTAAGTACGACG	AMRU	Ao	4939	PvP01_09_v1_685_-_PVP01_0905800_-1	0.115978
AMRU_Ao_GATGCTACAAGAAAGG	AMRU	Ao	3582	PvP01_09_v1_685_-_PVP01_0905800_-1	0.398406
AMRU_Ao_GATGCTACACGAGAGT	AMRU	Ao	3795	PvP01_09_v1_685_-_PVP01_0905800_-1	0.105533
AMRU_Ao_GATGCTAGTACAGTTC	AMRU	Ao	4640	PvP01_09_v1_685_-_PVP01_0905800_-1	0.405132
AMRU_Ao_GATGCTATCACATGCA	AMRU	Ao	79	PvP01_09_v1_685_-_PVP01_0905800_-1	0
AMRU_Ao_GATTCAGAGTATTGGA	AMRU	Ao	8586	PvP01_09_v1_685_-_PVP01_0905800_-1	0.0506663
AMRU_Ao_GCAAACTAGCGTAGTG	AMRU	Ao	3204	PvP01_09_v1_685_-_PVP01_0905800_-1	0.199382
AMRU_Ao_GCAAACTCAGTAACGG	AMRU	Ao	4788	PvP01_09_v1_685_-_PVP01_0905800_-1	0.857767
AMRU_Ao_GCAAACTCATGCGCAC	AMRU	Ao	3465	PvP01_09_v1_685_-_PVP01_0905800_-1	0
AMRU_Ao_GCAAACTTCATAGCAC	AMRU	Ao	3866	PvP01_09_v1_685_-_PVP01_0905800_-1	0.281664
AMRU_Ao_GCAAACTTCGAGGTAG	AMRU	Ao	1875	PvP01_09_v1_685_-_PVP01_0905800_-1	0
AMRU_Ao_GCAAACTTCGTGGACC	AMRU	Ao	6688	PvP01_09_v1_685_-_PVP01_0905800_-1	0.0737463
AMRU_Ao_GCAATCACAACCGCCA	AMRU	Ao	8909	PvP01_09_v1_685_-_PVP01_0905800_-1	0.0732833
AMRU_Ao_GCAATCATCCGTTGTC	AMRU	Ao	3893	PvP01_09_v1_685_-_PVP01_0905800_-1	0.161983
AMRU_Ao_GCACATAAGCAGGTCA	AMRU	Ao	5323	PvP01_09_v1_685_-_PVP01_0905800_-1	0.151837
AMRU_Ao_GCACATAAGCGATAGC	AMRU	Ao	4280	PvP01_09_v1_685_-_PVP01_0905800_-1	0.139281
AMRU_Ao_GCACATACATCGACGC	AMRU	Ao	1911	PvP01_09_v1_685_-_PVP01_0905800_-1	0.168634
AMRU_Ao_GCACATAGTAATAGCA	AMRU	Ao	4856	PvP01_09_v1_685_-_PVP01_0905800_-1	0.503271
AMRU_Ao_GCACATAGTACCAGTT	AMRU	Ao	7700	PvP01_09_v1_685_-_PVP01_0905800_-1	0
AMRU_Ao_GCACATAGTCTTGTCC	AMRU	Ao	4238	PvP01_09_v1_685_-_PVP01_0905800_-1	0.800641
AMRU_Ao_GCACTCTCACCATCCT	AMRU	Ao	5811	PvP01_09_v1_685_-_PVP01_0905800_-1	1.30298
AMRU_Ao_GCAGCCATCTTCTGGC	AMRU	Ao	6029	PvP01_09_v1_685_-_PVP01_0905800_-1	0.65387
AMRU_Ao_GCAGTTATCCGTCATC	AMRU	Ao	5621	PvP01_09_v1_685_-_PVP01_0905800_-1	0.678605
AMRU_Ao_GCATACACACCATCCT	AMRU	Ao	4199	PvP01_09_v1_685_-_PVP01_0905800_-1	0.330095
AMRU_Ao_GCATGATCACTATCTT	AMRU	Ao	436	PvP01_09_v1_685_-_PVP01_0905800_-1	0
AMRU_Ao_GCATGATTCTCGAGTA	AMRU	Ao	8242	PvP01_09_v1_685_-_PVP01_0905800_-1	0
AMRU_Ao_GCATGATTCTTAGAGC	AMRU	Ao	4176	PvP01_09_v1_685_-_PVP01_0905800_-1	0.424088
AMRU_Ao_GCATGCGAGAGCTGGT	AMRU	Ao	4872	PvP01_09_v1_685_-_PVP01_0905800_-1	0.620059
AMRU_Ao_GCATGCGGTAAGTTCC	AMRU	Ao	1960	PvP01_09_v1_685_-_PVP01_0905800_-1	0.254087
AMRU_Ao_GCATGCGGTTGAACTC	AMRU	Ao	1569	PvP01_09_v1_685_-_PVP01_0905800_-1	0.186811
AMRU_Ao_GCATGCGGTTTAAGCC	AMRU	Ao	5387	PvP01_09_v1_685_-_PVP01_0905800_-1	0.375704
AMRU_Ao_GCATGTAAGCTGTCTA	AMRU	Ao	1827	PvP01_09_v1_685_-_PVP01_0905800_-1	0
AMRU_Ao_GCATGTACACAACGCC	AMRU	Ao	4915	PvP01_09_v1_685_-_PVP01_0905800_-1	0.403642
AMRU_Ao_GCATGTATCTTGACGA	AMRU	Ao	80	PvP01_09_v1_685_-_PVP01_0905800_-1	0.102912
AMRU_Ao_GCCAAATAGCACGCCT	AMRU	Ao	4834	PvP01_09_v1_685_-_PVP01_0905800_-1	0.787557
AMRU_Ao_GCCAAATTCAGAAATG	AMRU	Ao	5778	PvP01_09_v1_685_-_PVP01_0905800_-1	1.3587
AMRU_Ao_GCCTCTACAGACGCAA	AMRU	Ao	4286	PvP01_09_v1_685_-_PVP01_0905800_-1	0.354158
AMRU_Ao_GCCTCTACATGCTAGT	AMRU	Ao	6554	PvP01_09_v1_685_-_PVP01_0905800_-1	0.849955
AMRU_Ao_GCCTCTAGTTCAGCGC	AMRU	Ao	1691	PvP01_09_v1_685_-_PVP01_0905800_-1	0
AMRU_Ao_GCGACCACATCGTCGG	AMRU	Ao	5011	PvP01_09_v1_685_-_PVP01_0905800_-1	1.15881
AMRU_Ao_GCGACCAGTCAGATAA	AMRU	Ao	3149	PvP01_09_v1_685_-_PVP01_0905800_-1	0.234014
AMRU_Ao_GCGACCAGTCCCGACA	AMRU	Ao	3558	PvP01_09_v1_685_-_PVP01_0905800_-1	0.134989
AMRU_Ao_GCGACCAGTGTCAATC	AMRU	Ao	7623	PvP01_09_v1_685_-_PVP01_0905800_-1	0
AMRU_Ao_GCGAGAACAGACACTT	AMRU	Ao	8713	PvP01_09_v1_685_-_PVP01_0905800_-1	0.0734862
AMRU_Ao_GCGAGAAGTCGGGTCT	AMRU	Ao	2381	PvP01_09_v1_685_-_PVP01_0905800_-1	0.0785978
AMRU_Ao_GCGAGAATCTTCCTTC	AMRU	Ao	2951	PvP01_09_v1_685_-_PVP01_0905800_-1	0.426787
AMRU_Ao_GCGCAACAGCCACCTG	AMRU	Ao	5887	PvP01_09_v1_685_-_PVP01_0905800_-1	0.757878
AMRU_Ao_GCGCAACAGTCCGTAT	AMRU	Ao	1099	PvP01_09_v1_685_-_PVP01_0905800_-1	0.113314
AMRU_Ao_GCGCAGTAGGCAAAGA	AMRU	Ao	3211	PvP01_09_v1_685_-_PVP01_0905800_-1	0
AMRU_Ao_GCGCAGTCAATGGAGC	AMRU	Ao	3637	PvP01_09_v1_685_-_PVP01_0905800_-1	0
AMRU_Ao_GCGCAGTGTCGCTTTC	AMRU	Ao	8417	PvP01_09_v1_685_-_PVP01_0905800_-1	0.0414139
AMRU_Ao_GCGCCAAAGGCTAGAC	AMRU	Ao	3952	PvP01_09_v1_685_-_PVP01_0905800_-1	0.531809
AMRU_Ao_GCGCCAACACAAGACG	AMRU	Ao	1925	PvP01_09_v1_685_-_PVP01_0905800_-1	0.158061
AMRU_Ao_GCGCGATAGAAGATTC	AMRU	Ao	3109	PvP01_09_v1_685_-_PVP01_0905800_-1	0.142924
AMRU_Ao_GCGCGATAGTGAAGAG	AMRU	Ao	1598	PvP01_09_v1_685_-_PVP01_0905800_-1	0.192295
AMRU_Ao_GCGCGATCAGTCCTTC	AMRU	Ao	5901	PvP01_09_v1_685_-_PVP01_0905800_-1	2.02115
AMRU_Ao_GCGCGATGTCGGCTCA	AMRU	Ao	8077	PvP01_09_v1_685_-_PVP01_0905800_-1	0.338045
AMRU_Ao_GCGCGATTCACAGTAC	AMRU	Ao	8806	PvP01_09_v1_685_-_PVP01_0905800_-1	0
AMRU_Ao_GCGGGTTAGCAACGGT	AMRU	Ao	4110	PvP01_09_v1_685_-_PVP01_0905800_-1	0
AMRU_Ao_GCGGGTTAGGGTGTGT	AMRU	Ao	2966	PvP01_09_v1_685_-_PVP01_0905800_-1	0
AMRU_Ao_GCGGGTTGTATGAATG	AMRU	Ao	3679	PvP01_09_v1_685_-_PVP01_0905800_-1	0.348772
AMRU_Ao_GCGGGTTTCAGCCTAA	AMRU	Ao	3833	PvP01_09_v1_685_-_PVP01_0905800_-1	0.221092
AMRU_Ao_GCGGGTTTCAGGCCCA	AMRU	Ao	4284	PvP01_09_v1_685_-_PVP01_0905800_-1	0.0743882
AMRU_Ao_GCGGGTTTCCAAACTG	AMRU	Ao	8853	PvP01_09_v1_685_-_PVP01_0905800_-1	0.10853
AMRU_Ao_GCTCCTAGTAACGTTC	AMRU	Ao	8476	PvP01_09_v1_685_-_PVP01_0905800_-1	0.0224704
AMRU_Ao_GCTCCTAGTGTGTGCC	AMRU	Ao	4476	PvP01_09_v1_685_-_PVP01_0905800_-1	0.746446
AMRU_Ao_GCTCCTATCAATACCG	AMRU	Ao	1893	PvP01_09_v1_685_-_PVP01_0905800_-1	0
AMRU_Ao_GCTCCTATCACGACTA	AMRU	Ao	5700	PvP01_09_v1_685_-_PVP01_0905800_-1	0.488612
AMRU_Ao_GCTCCTATCCTGTAGA	AMRU	Ao	4628	PvP01_09_v1_685_-_PVP01_0905800_-1	1.02669
AMRU_Ao_GCTCTGTCATCAGTCA	AMRU	Ao	4245	PvP01_09_v1_685_-_PVP01_0905800_-1	0.0363702
AMRU_Ao_GCTCTGTGTGCAGGTA	AMRU	Ao	2024	PvP01_09_v1_685_-_PVP01_0905800_-1	0.057205
AMRU_Ao_GCTGCAGCAGGACCCT	AMRU	Ao	5483	PvP01_09_v1_685_-_PVP01_0905800_-1	1.49052
AMRU_Ao_GCTGCAGGTAGCTGCC	AMRU	Ao	5508	PvP01_09_v1_685_-_PVP01_0905800_-1	1.73358
AMRU_Ao_GCTGCAGGTCTACCTC	AMRU	Ao	6229	PvP01_09_v1_685_-_PVP01_0905800_-1	2.33531
AMRU_Ao_GCTGCAGGTCTCATCC	AMRU	Ao	1744	PvP01_09_v1_685_-_PVP01_0905800_-1	0.241293
AMRU_Ao_GCTGCAGTCAATACCG	AMRU	Ao	3306	PvP01_09_v1_685_-_PVP01_0905800_-1	0.404274
AMRU_Ao_GCTGCAGTCCTCAATT	AMRU	Ao	6287	PvP01_09_v1_685_-_PVP01_0905800_-1	0.292826
AMRU_Ao_GCTGCAGTCCTTAATC	AMRU	Ao	2879	PvP01_09_v1_685_-_PVP01_0905800_-1	0
AMRU_Ao_GCTGCGAAGCAATATG	AMRU	Ao	3775	PvP01_09_v1_685_-_PVP01_0905800_-1	0.360036
AMRU_Ao_GCTGCGACACCGGAAA	AMRU	Ao	4736	PvP01_09_v1_685_-_PVP01_0905800_-1	0.248308
AMRU_Ao_GCTGCGACATGCATGT	AMRU	Ao	5161	PvP01_09_v1_685_-_PVP01_0905800_-1	0.733972
AMRU_Ao_GCTGCGATCATTGCGA	AMRU	Ao	1871	PvP01_09_v1_685_-_PVP01_0905800_-1	0.0434518
AMRU_Ao_GCTGCGATCCCTGACT	AMRU	Ao	2735	PvP01_09_v1_685_-_PVP01_0905800_-1	0.0670376
AMRU_Ao_GCTGCGATCTTACCGC	AMRU	Ao	5918	PvP01_09_v1_685_-_PVP01_0905800_-1	1.1178
AMRU_Ao_GCTGCTTGTTCGTCTC	AMRU	Ao	6220	PvP01_09_v1_685_-_PVP01_0905800_-1	1.09472
AMRU_Ao_GCTGCTTTCATCATTC	AMRU	Ao	8616	PvP01_09_v1_685_-_PVP01_0905800_-1	0.160308
AMRU_Ao_GCTGCTTTCCTGCAGG	AMRU	Ao	2795	PvP01_09_v1_685_-_PVP01_0905800_-1	0.13164
AMRU_Ao_GCTGCTTTCTCTGCTG	AMRU	Ao	7713	PvP01_09_v1_685_-_PVP01_0905800_-1	0
AMRU_Ao_GCTGGGTAGAGTACCG	AMRU	Ao	3592	PvP01_09_v1_685_-_PVP01_0905800_-1	0.690555
AMRU_Ao_GCTGGGTTCCTTTACA	AMRU	Ao	6372	PvP01_09_v1_685_-_PVP01_0905800_-1	1.4123
AMRU_Ao_GCTTCCAAGATAGGAG	AMRU	Ao	3950	PvP01_09_v1_685_-_PVP01_0905800_-1	0
AMRU_Ao_GCTTCCAAGGACGAAA	AMRU	Ao	4482	PvP01_09_v1_685_-_PVP01_0905800_-1	0
AMRU_Ao_GCTTCCACAAAGGTGC	AMRU	Ao	4572	PvP01_09_v1_685_-_PVP01_0905800_-1	0.717317
AMRU_Ao_GCTTCCACACCATGTA	AMRU	Ao	7515	PvP01_09_v1_685_-_PVP01_0905800_-1	0
AMRU_Ao_GCTTCCACACCGCTAG	AMRU	Ao	3886	PvP01_09_v1_685_-_PVP01_0905800_-1	0.543951
AMRU_Ao_GCTTCCAGTTTAGGAA	AMRU	Ao	5439	PvP01_09_v1_685_-_PVP01_0905800_-1	0.128211
AMRU_Ao_GCTTCCATCCTAGTGA	AMRU	Ao	5793	PvP01_09_v1_685_-_PVP01_0905800_-1	1.24152
AMRU_Ao_GCTTGAATCGGCCGAT	AMRU	Ao	5959	PvP01_09_v1_685_-_PVP01_0905800_-1	0.612283
AMRU_Ao_GCTTGAATCGGTCCGA	AMRU	Ao	4082	PvP01_09_v1_685_-_PVP01_0905800_-1	0.160462
AMRU_Ao_GGAAAGCAGGCTAGCA	AMRU	Ao	8777	PvP01_09_v1_685_-_PVP01_0905800_-1	0
AMRU_Ao_GGAAAGCGTGCCTGTG	AMRU	Ao	6203	PvP01_09_v1_685_-_PVP01_0905800_-1	1.59907
AMRU_Ao_GGAACTTAGACCTTTG	AMRU	Ao	4209	PvP01_09_v1_685_-_PVP01_0905800_-1	0.0815062
AMRU_Ao_GGAACTTAGCAACGGT	AMRU	Ao	8326	PvP01_09_v1_685_-_PVP01_0905800_-1	0.132124
AMRU_Ao_GGAACTTAGTGGTAGC	AMRU	Ao	7402	PvP01_09_v1_685_-_PVP01_0905800_-1	0
AMRU_Ao_GGAACTTGTCACTGGC	AMRU	Ao	4057	PvP01_09_v1_685_-_PVP01_0905800_-1	0.0498878
AMRU_Ao_GGAACTTTCGTTGACA	AMRU	Ao	296	PvP01_09_v1_685_-_PVP01_0905800_-1	0
AMRU_Ao_GGAATAAAGGGCATGT	AMRU	Ao	3321	PvP01_09_v1_685_-_PVP01_0905800_-1	0.0534845
AMRU_Ao_GGAATAAAGTACGTTC	AMRU	Ao	8836	PvP01_09_v1_685_-_PVP01_0905800_-1	0.0903914
AMRU_Ao_GGAATAAGTCGCGGTT	AMRU	Ao	1496	PvP01_09_v1_685_-_PVP01_0905800_-1	0.0664496
AMRU_Ao_GGAATAATCTCGCATC	AMRU	Ao	4112	PvP01_09_v1_685_-_PVP01_0905800_-1	0.100281
AMRU_Ao_GGACAAGCAATTGCTG	AMRU	Ao	322	PvP01_09_v1_685_-_PVP01_0905800_-1	0
AMRU_Ao_GGACAAGCAGTTAACC	AMRU	Ao	1985	PvP01_09_v1_685_-_PVP01_0905800_-1	0.0691037
AMRU_Ao_GGACAAGCATCACGAT	AMRU	Ao	2758	PvP01_09_v1_685_-_PVP01_0905800_-1	0.0517411
AMRU_Ao_GGACAAGGTCTAGTCA	AMRU	Ao	2421	PvP01_09_v1_685_-_PVP01_0905800_-1	0.262826
AMRU_Ao_GGACAAGTCATAACCG	AMRU	Ao	4889	PvP01_09_v1_685_-_PVP01_0905800_-1	0.540249
AMRU_Ao_GGACAGACAGGGTATG	AMRU	Ao	8537	PvP01_09_v1_685_-_PVP01_0905800_-1	0
AMRU_Ao_GGACAGATCAGGTTCA	AMRU	Ao	4331	PvP01_09_v1_685_-_PVP01_0905800_-1	0.0593401
AMRU_Ao_GGACAGATCGCGTTTC	AMRU	Ao	3137	PvP01_09_v1_685_-_PVP01_0905800_-1	0.0628299
AMRU_Ao_GGACATTAGCGCCTTG	AMRU	Ao	2431	PvP01_09_v1_685_-_PVP01_0905800_-1	0
AMRU_Ao_GGACATTGTAAACGCG	AMRU	Ao	5438	PvP01_09_v1_685_-_PVP01_0905800_-1	0.496089
AMRU_Ao_GGACATTGTACAGCAG	AMRU	Ao	3916	PvP01_09_v1_685_-_PVP01_0905800_-1	0.292346
AMRU_Ao_GGACGTCAGCTGTTCA	AMRU	Ao	3275	PvP01_09_v1_685_-_PVP01_0905800_-1	0.0699839
AMRU_Ao_GGACGTCCAATGAATG	AMRU	Ao	4063	PvP01_09_v1_685_-_PVP01_0905800_-1	0.312134
AMRU_Ao_GGAGCAACAGTTCCCT	AMRU	Ao	4123	PvP01_09_v1_685_-_PVP01_0905800_-1	0.442576
AMRU_Ao_GGAGCAACATCGTCGG	AMRU	Ao	3474	PvP01_09_v1_685_-_PVP01_0905800_-1	0.228154
AMRU_Ao_GGATGTTAGCTAGTGG	AMRU	Ao	7699	PvP01_09_v1_685_-_PVP01_0905800_-1	0.481278
AMRU_Ao_GGATGTTCACTGTCGG	AMRU	Ao	3040	PvP01_09_v1_685_-_PVP01_0905800_-1	0.0944287
AMRU_Ao_GGATTACCAGAGTGTG	AMRU	Ao	5206	PvP01_09_v1_685_-_PVP01_0905800_-1	0.114989
AMRU_Ao_GGATTACCATGGAATA	AMRU	Ao	9162	PvP01_09_v1_685_-_PVP01_0905800_-1	0
AMRU_Ao_GGATTACTCGGATGTT	AMRU	Ao	8771	PvP01_09_v1_685_-_PVP01_0905800_-1	0.0946186
AMRU_Ao_GGATTACTCTGCGACG	AMRU	Ao	8021	PvP01_09_v1_685_-_PVP01_0905800_-1	0.153257
AMRU_Ao_GGCAATTAGACCCACC	AMRU	Ao	4969	PvP01_09_v1_685_-_PVP01_0905800_-1	1.6624
AMRU_Ao_GGCAATTAGCTTCGCG	AMRU	Ao	7864	PvP01_09_v1_685_-_PVP01_0905800_-1	0.180075
AMRU_Ao_GGCAATTCATGAGCGA	AMRU	Ao	1473	PvP01_09_v1_685_-_PVP01_0905800_-1	0.0732601
AMRU_Ao_GGCAATTGTTACGCGC	AMRU	Ao	8789	PvP01_09_v1_685_-_PVP01_0905800_-1	0.229311
AMRU_Ao_GGCAATTTCCGGGTGT	AMRU	Ao	3666	PvP01_09_v1_685_-_PVP01_0905800_-1	0.195822
AMRU_Ao_GGCCGATCACCTATCC	AMRU	Ao	8758	PvP01_09_v1_685_-_PVP01_0905800_-1	0.101736
AMRU_Ao_GGCCGATCATATGCTG	AMRU	Ao	4831	PvP01_09_v1_685_-_PVP01_0905800_-1	0.668658
AMRU_Ao_GGCCGATGTCTTTCAT	AMRU	Ao	4646	PvP01_09_v1_685_-_PVP01_0905800_-1	0.529989
AMRU_Ao_GGCCGATTCGAGGTAG	AMRU	Ao	4429	PvP01_09_v1_685_-_PVP01_0905800_-1	0
AMRU_Ao_GGCGACTAGCGATATA	AMRU	Ao	3806	PvP01_09_v1_685_-_PVP01_0905800_-1	0.161996
AMRU_Ao_GGCGACTAGCTCCCAG	AMRU	Ao	3705	PvP01_09_v1_685_-_PVP01_0905800_-1	0
AMRU_Ao_GGCGACTCAATGAAAC	AMRU	Ao	9069	PvP01_09_v1_685_-_PVP01_0905800_-1	0
AMRU_Ao_GGCGACTCATGCCTTC	AMRU	Ao	6623	PvP01_09_v1_685_-_PVP01_0905800_-1	0.346781
AMRU_Ao_GGCGACTGTAATCGTC	AMRU	Ao	1396	PvP01_09_v1_685_-_PVP01_0905800_-1	0
AMRU_Ao_GGCGACTGTATCTGCA	AMRU	Ao	5390	PvP01_09_v1_685_-_PVP01_0905800_-1	0.178752
AMRU_Ao_GGCGACTGTCCCTACT	AMRU	Ao	6355	PvP01_09_v1_685_-_PVP01_0905800_-1	0.0821828
AMRU_Ao_GGCGACTGTCGCTTTC	AMRU	Ao	2419	PvP01_09_v1_685_-_PVP01_0905800_-1	0.486204
AMRU_Ao_GGCGACTGTCGTGGCT	AMRU	Ao	8735	PvP01_09_v1_685_-_PVP01_0905800_-1	0
AMRU_Ao_GGCGACTTCAAACGGG	AMRU	Ao	3761	PvP01_09_v1_685_-_PVP01_0905800_-1	0.129626
AMRU_Ao_GGCGACTTCCATGCTC	AMRU	Ao	4221	PvP01_09_v1_685_-_PVP01_0905800_-1	0.634456
AMRU_Ao_GGCGTGTGTCGCTTCT	AMRU	Ao	4385	PvP01_09_v1_685_-_PVP01_0905800_-1	0.0811655
AMRU_Ao_GGCGTGTGTGGTTTCA	AMRU	Ao	8511	PvP01_09_v1_685_-_PVP01_0905800_-1	0.114432
AMRU_Ao_GGCGTGTTCCAGTATG	AMRU	Ao	4496	PvP01_09_v1_685_-_PVP01_0905800_-1	0.241692
AMRU_Ao_GGCGTGTTCTTATCTG	AMRU	Ao	4661	PvP01_09_v1_685_-_PVP01_0905800_-1	0.289017
AMRU_Ao_GGCTCGAAGACTGTAA	AMRU	Ao	5123	PvP01_09_v1_685_-_PVP01_0905800_-1	1.19964
AMRU_Ao_GGCTCGAAGTACATGA	AMRU	Ao	1665	PvP01_09_v1_685_-_PVP01_0905800_-1	0.0804635
AMRU_Ao_GGCTCGAGTCATCGGC	AMRU	Ao	8631	PvP01_09_v1_685_-_PVP01_0905800_-1	0.296331
AMRU_Ao_GGCTCGATCCGCGGTA	AMRU	Ao	3200	PvP01_09_v1_685_-_PVP01_0905800_-1	0
AMRU_Ao_GGCTGGTAGCTCAACT	AMRU	Ao	6868	PvP01_09_v1_685_-_PVP01_0905800_-1	0.0716949
AMRU_Ao_GGCTGGTAGTGACATA	AMRU	Ao	3486	PvP01_09_v1_685_-_PVP01_0905800_-1	0.222568
AMRU_Ao_GGCTGGTCAATGACCT	AMRU	Ao	8860	PvP01_09_v1_685_-_PVP01_0905800_-1	0.050158
AMRU_Ao_GGCTGGTCAGTAAGCG	AMRU	Ao	8210	PvP01_09_v1_685_-_PVP01_0905800_-1	0.0374167
AMRU_Ao_GGGAATGAGATCTGAA	AMRU	Ao	4744	PvP01_09_v1_685_-_PVP01_0905800_-1	0.480307
AMRU_Ao_GGGAATGGTATGGTTC	AMRU	Ao	4399	PvP01_09_v1_685_-_PVP01_0905800_-1	0.250815
AMRU_Ao_GGGAATGTCGCATGAT	AMRU	Ao	4275	PvP01_09_v1_685_-_PVP01_0905800_-1	0
AMRU_Ao_GGGACCTCAATCCGAT	AMRU	Ao	8855	PvP01_09_v1_685_-_PVP01_0905800_-1	0
AMRU_Ao_GGGACCTCAGTGAGTG	AMRU	Ao	6222	PvP01_09_v1_685_-_PVP01_0905800_-1	1.18583
AMRU_Ao_GGGACCTGTTGACGTT	AMRU	Ao	8852	PvP01_09_v1_685_-_PVP01_0905800_-1	0.139338
AMRU_Ao_GGGACCTTCACAATGC	AMRU	Ao	4171	PvP01_09_v1_685_-_PVP01_0905800_-1	0.22121
AMRU_Ao_GGGACCTTCTCCAACC	AMRU	Ao	3751	PvP01_09_v1_685_-_PVP01_0905800_-1	0.318193
AMRU_Ao_GGGAGATCAGTGGGAT	AMRU	Ao	2837	PvP01_09_v1_685_-_PVP01_0905800_-1	0
AMRU_Ao_GGGATGACAGTGGAGT	AMRU	Ao	3050	PvP01_09_v1_685_-_PVP01_0905800_-1	0.0941265
AMRU_Ao_GGGCACTCACTATCTT	AMRU	Ao	4263	PvP01_09_v1_685_-_PVP01_0905800_-1	0.344313
AMRU_Ao_GGGCACTCAGCCAATT	AMRU	Ao	4204	PvP01_09_v1_685_-_PVP01_0905800_-1	1.05314
AMRU_Ao_GGGCACTCAGCCTATA	AMRU	Ao	3236	PvP01_09_v1_685_-_PVP01_0905800_-1	0.0607755
AMRU_Ao_GGGCACTCATGCAATC	AMRU	Ao	1884	PvP01_09_v1_685_-_PVP01_0905800_-1	0.215564
AMRU_Ao_GGGCACTGTCCGAAGA	AMRU	Ao	4378	PvP01_09_v1_685_-_PVP01_0905800_-1	1.12024
AMRU_Ao_GGGCACTGTTACTGAC	AMRU	Ao	5216	PvP01_09_v1_685_-_PVP01_0905800_-1	1.6441
AMRU_Ao_GGGCACTGTTCCACAA	AMRU	Ao	7646	PvP01_09_v1_685_-_PVP01_0905800_-1	0.098561
AMRU_Ao_GGGCATCAGAGACGAA	AMRU	Ao	5907	PvP01_09_v1_685_-_PVP01_0905800_-1	1.14709
AMRU_Ao_GGGCATCAGCACAGGT	AMRU	Ao	6263	PvP01_09_v1_685_-_PVP01_0905800_-1	0.648899
AMRU_Ao_GGGCATCCAAGCCGTC	AMRU	Ao	4279	PvP01_09_v1_685_-_PVP01_0905800_-1	1.03966
AMRU_Ao_GGGCATCGTACGCTGC	AMRU	Ao	7233	PvP01_09_v1_685_-_PVP01_0905800_-1	0
AMRU_Ao_GGGCATCGTATCTGCA	AMRU	Ao	8928	PvP01_09_v1_685_-_PVP01_0905800_-1	0.170058
AMRU_Ao_GGGCATCTCCGCGGTA	AMRU	Ao	9074	PvP01_09_v1_685_-_PVP01_0905800_-1	0.0974279
AMRU_Ao_GGGTCTGGTAGCTCCG	AMRU	Ao	1650	PvP01_09_v1_685_-_PVP01_0905800_-1	0.103466
AMRU_Ao_GGGTCTGGTCTCAACA	AMRU	Ao	5183	PvP01_09_v1_685_-_PVP01_0905800_-1	0.417769
AMRU_Ao_GGGTCTGTCAGCGATT	AMRU	Ao	8634	PvP01_09_v1_685_-_PVP01_0905800_-1	0.208247
AMRU_Ao_GGGTTGCTCCGTCAAA	AMRU	Ao	1221	PvP01_09_v1_685_-_PVP01_0905800_-1	0
AMRU_Ao_GGTATTGCACCTGGTG	AMRU	Ao	3701	PvP01_09_v1_685_-_PVP01_0905800_-1	0
AMRU_Ao_GGTGAAGAGTGTCTCA	AMRU	Ao	5497	PvP01_09_v1_685_-_PVP01_0905800_-1	0.453027
AMRU_Ao_GGTGAAGGTCAGCTAT	AMRU	Ao	3291	PvP01_09_v1_685_-_PVP01_0905800_-1	0.0680874
AMRU_Ao_GGTGAAGGTGCTCTTC	AMRU	Ao	5410	PvP01_09_v1_685_-_PVP01_0905800_-1	0.971458
AMRU_Ao_GGTGAAGTCTGCTTGC	AMRU	Ao	4601	PvP01_09_v1_685_-_PVP01_0905800_-1	0.598563
AMRU_Ao_GGTGCGTAGAGAGCTC	AMRU	Ao	3936	PvP01_09_v1_685_-_PVP01_0905800_-1	0.274971
AMRU_Ao_GGTGCGTCAACACCCG	AMRU	Ao	8136	PvP01_09_v1_685_-_PVP01_0905800_-1	0
AMRU_Ao_GGTGCGTTCGAATCCA	AMRU	Ao	1063	PvP01_09_v1_685_-_PVP01_0905800_-1	0.066507
AMRU_Ao_GGTGTTAAGCGACGTA	AMRU	Ao	5219	PvP01_09_v1_685_-_PVP01_0905800_-1	0.250887
AMRU_Ao_GGTGTTAAGTGGTCCC	AMRU	Ao	4753	PvP01_09_v1_685_-_PVP01_0905800_-1	0.36268
AMRU_Ao_GGTGTTATCTCACATT	AMRU	Ao	5156	PvP01_09_v1_685_-_PVP01_0905800_-1	2.16285
AMRU_Ao_GTAACGTCATATGAGA	AMRU	Ao	4151	PvP01_09_v1_685_-_PVP01_0905800_-1	0.149514
AMRU_Ao_GTAACGTGTATTAGCC	AMRU	Ao	8873	PvP01_09_v1_685_-_PVP01_0905800_-1	0.0566267
AMRU_Ao_GTAACGTGTCCTCTTG	AMRU	Ao	2109	PvP01_09_v1_685_-_PVP01_0905800_-1	0.128287
AMRU_Ao_GTAACGTGTGGTGTAG	AMRU	Ao	4523	PvP01_09_v1_685_-_PVP01_0905800_-1	0.628964
AMRU_Ao_GTAACTGCAACAACCT	AMRU	Ao	2146	PvP01_09_v1_685_-_PVP01_0905800_-1	0.250376
AMRU_Ao_GTAACTGTCTCTAAGG	AMRU	Ao	3672	PvP01_09_v1_685_-_PVP01_0905800_-1	0.0741785
AMRU_Ao_GTAACTGTCTTACCTA	AMRU	Ao	2986	PvP01_09_v1_685_-_PVP01_0905800_-1	0.073443
AMRU_Ao_GTACGTAAGTGAACGC	AMRU	Ao	3835	PvP01_09_v1_685_-_PVP01_0905800_-1	0.401883
AMRU_Ao_GTACGTACATCAGTCA	AMRU	Ao	520	PvP01_09_v1_685_-_PVP01_0905800_-1	0
AMRU_Ao_GTACGTAGTCATACTG	AMRU	Ao	5124	PvP01_09_v1_685_-_PVP01_0905800_-1	0.556552
AMRU_Ao_GTACTCCGTAAATACG	AMRU	Ao	9070	PvP01_09_v1_685_-_PVP01_0905800_-1	0.136958
AMRU_Ao_GTACTCCTCAGGCCCA	AMRU	Ao	3968	PvP01_09_v1_685_-_PVP01_0905800_-1	0.26812
AMRU_Ao_GTACTTTCACAACGTT	AMRU	Ao	8318	PvP01_09_v1_685_-_PVP01_0905800_-1	0
AMRU_Ao_GTACTTTGTACCGTAT	AMRU	Ao	5613	PvP01_09_v1_685_-_PVP01_0905800_-1	1.15748
AMRU_Ao_GTACTTTGTATATGGA	AMRU	Ao	3921	PvP01_09_v1_685_-_PVP01_0905800_-1	0.114554
AMRU_Ao_GTACTTTGTGTGCCTG	AMRU	Ao	4451	PvP01_09_v1_685_-_PVP01_0905800_-1	0.0789422
AMRU_Ao_GTACTTTTCATCTGCC	AMRU	Ao	7871	PvP01_09_v1_685_-_PVP01_0905800_-1	0.387868
AMRU_Ao_GTACTTTTCGGCGCTA	AMRU	Ao	8656	PvP01_09_v1_685_-_PVP01_0905800_-1	0.0491606
AMRU_Ao_GTAGGCCAGTCGTACT	AMRU	Ao	5245	PvP01_09_v1_685_-_PVP01_0905800_-1	0.478899
AMRU_Ao_GTAGGCCCACTAAGTC	AMRU	Ao	4952	PvP01_09_v1_685_-_PVP01_0905800_-1	0.0967726
AMRU_Ao_GTAGGCCCAGCCTATA	AMRU	Ao	3977	PvP01_09_v1_685_-_PVP01_0905800_-1	0.620347
AMRU_Ao_GTAGGCCCAGCTGGCT	AMRU	Ao	4333	PvP01_09_v1_685_-_PVP01_0905800_-1	0.289637
AMRU_Ao_GTAGGCCGTTCCATGA	AMRU	Ao	4259	PvP01_09_v1_685_-_PVP01_0905800_-1	0.116104
AMRU_Ao_GTAGGCCTCACTCCTG	AMRU	Ao	1534	PvP01_09_v1_685_-_PVP01_0905800_-1	0.0954107
AMRU_Ao_GTAGGCCTCCAGGGCT	AMRU	Ao	5274	PvP01_09_v1_685_-_PVP01_0905800_-1	0.589222
AMRU_Ao_GTAGTCAAGGCCCTCA	AMRU	Ao	8222	PvP01_09_v1_685_-_PVP01_0905800_-1	0.0883861
AMRU_Ao_GTAGTCATCAACCAAC	AMRU	Ao	131	PvP01_09_v1_685_-_PVP01_0905800_-1	0
AMRU_Ao_GTAGTCATCCTTTCTC	AMRU	Ao	8688	PvP01_09_v1_685_-_PVP01_0905800_-1	0.134035
AMRU_Ao_GTATCTTAGCCAGTAG	AMRU	Ao	4034	PvP01_09_v1_685_-_PVP01_0905800_-1	0.169856
AMRU_Ao_GTATCTTAGGGTATCG	AMRU	Ao	4237	PvP01_09_v1_685_-_PVP01_0905800_-1	0
AMRU_Ao_GTATCTTTCAGTCAGT	AMRU	Ao	3252	PvP01_09_v1_685_-_PVP01_0905800_-1	0.135117
AMRU_Ao_GTATCTTTCGCATGAT	AMRU	Ao	1229	PvP01_09_v1_685_-_PVP01_0905800_-1	0.0605034
AMRU_Ao_GTCAAGTAGGATCGCA	AMRU	Ao	4463	PvP01_09_v1_685_-_PVP01_0905800_-1	0.625293
AMRU_Ao_GTCAAGTCACGAGAGT	AMRU	Ao	2285	PvP01_09_v1_685_-_PVP01_0905800_-1	0.170232
AMRU_Ao_GTCAAGTCAGATCGGA	AMRU	Ao	3915	PvP01_09_v1_685_-_PVP01_0905800_-1	0.537172
AMRU_Ao_GTCACAAAGCTCCTTC	AMRU	Ao	3796	PvP01_09_v1_685_-_PVP01_0905800_-1	0.630418
AMRU_Ao_GTCACAACAGGTTTCA	AMRU	Ao	4660	PvP01_09_v1_685_-_PVP01_0905800_-1	0.747664
AMRU_Ao_GTCACAATCTCCCTGA	AMRU	Ao	64	PvP01_09_v1_685_-_PVP01_0905800_-1	0
AMRU_Ao_GTCACGGCAAAGTCAA	AMRU	Ao	5273	PvP01_09_v1_685_-_PVP01_0905800_-1	0.329831
AMRU_Ao_GTCATTTAGCGTAGTG	AMRU	Ao	3110	PvP01_09_v1_685_-_PVP01_0905800_-1	0.515066
AMRU_Ao_GTCATTTAGGCCATAG	AMRU	Ao	5275	PvP01_09_v1_685_-_PVP01_0905800_-1	0.500668
AMRU_Ao_GTCATTTCAGTCGTGC	AMRU	Ao	5532	PvP01_09_v1_685_-_PVP01_0905800_-1	0
AMRU_Ao_GTCATTTCATCCGGGT	AMRU	Ao	4422	PvP01_09_v1_685_-_PVP01_0905800_-1	0.152724
AMRU_Ao_GTCATTTTCTTATCTG	AMRU	Ao	4269	PvP01_09_v1_685_-_PVP01_0905800_-1	0
AMRU_Ao_GTCCTCAAGACATAAC	AMRU	Ao	78	PvP01_09_v1_685_-_PVP01_0905800_-1	0
AMRU_Ao_GTCCTCAAGCTAACTC	AMRU	Ao	1797	PvP01_09_v1_685_-_PVP01_0905800_-1	0.569728
AMRU_Ao_GTCCTCACATGTTCCC	AMRU	Ao	5125	PvP01_09_v1_685_-_PVP01_0905800_-1	0.900901
AMRU_Ao_GTCCTCATCGTGGTCG	AMRU	Ao	4264	PvP01_09_v1_685_-_PVP01_0905800_-1	0.34193
AMRU_Ao_GTCCTCATCTTCATGT	AMRU	Ao	3228	PvP01_09_v1_685_-_PVP01_0905800_-1	0.132427
AMRU_Ao_GTCGGGTGTACTTGAC	AMRU	Ao	4881	PvP01_09_v1_685_-_PVP01_0905800_-1	0.884467
AMRU_Ao_GTCGGGTGTTCGGCAC	AMRU	Ao	5064	PvP01_09_v1_685_-_PVP01_0905800_-1	0.74239
AMRU_Ao_GTCGTAACACATGACT	AMRU	Ao	4194	PvP01_09_v1_685_-_PVP01_0905800_-1	0.15201
AMRU_Ao_GTCGTAACAGAGTGTG	AMRU	Ao	4202	PvP01_09_v1_685_-_PVP01_0905800_-1	0.222999
AMRU_Ao_GTCTCGTAGCGATGAC	AMRU	Ao	8659	PvP01_09_v1_685_-_PVP01_0905800_-1	0
AMRU_Ao_GTCTCGTCATTGGCGC	AMRU	Ao	3198	PvP01_09_v1_685_-_PVP01_0905800_-1	1.18802
AMRU_Ao_GTCTCGTGTGGGTATG	AMRU	Ao	4317	PvP01_09_v1_685_-_PVP01_0905800_-1	0.183857
AMRU_Ao_GTCTCGTGTTTGTGTG	AMRU	Ao	3614	PvP01_09_v1_685_-_PVP01_0905800_-1	0.142376
AMRU_Ao_GTCTTCGCAATGACCT	AMRU	Ao	4509	PvP01_09_v1_685_-_PVP01_0905800_-1	0.404826
AMRU_Ao_GTGAAGGAGCAATCTC	AMRU	Ao	4001	PvP01_09_v1_685_-_PVP01_0905800_-1	0
AMRU_Ao_GTGAAGGAGCTAGTCT	AMRU	Ao	6865	PvP01_09_v1_685_-_PVP01_0905800_-1	0.0951384
AMRU_Ao_GTGAAGGAGGCATGGT	AMRU	Ao	1482	PvP01_09_v1_685_-_PVP01_0905800_-1	0.250988
AMRU_Ao_GTGAAGGCACAGATTC	AMRU	Ao	4153	PvP01_09_v1_685_-_PVP01_0905800_-1	0
AMRU_Ao_GTGCAGCAGTGGGCTA	AMRU	Ao	6034	PvP01_09_v1_685_-_PVP01_0905800_-1	1.36547
AMRU_Ao_GTGCAGCGTGCTGTAT	AMRU	Ao	3548	PvP01_09_v1_685_-_PVP01_0905800_-1	0.398486
AMRU_Ao_GTGCATAAGAGCTTCT	AMRU	Ao	4780	PvP01_09_v1_685_-_PVP01_0905800_-1	0.0552486
AMRU_Ao_GTGCATACAAGCCATT	AMRU	Ao	3693	PvP01_09_v1_685_-_PVP01_0905800_-1	0.186301
AMRU_Ao_GTGCATACAATGAATG	AMRU	Ao	5571	PvP01_09_v1_685_-_PVP01_0905800_-1	0.700133
AMRU_Ao_GTGCATACAGCTGCTG	AMRU	Ao	8843	PvP01_09_v1_685_-_PVP01_0905800_-1	0.124174
AMRU_Ao_GTGCATATCAATAAGG	AMRU	Ao	2697	PvP01_09_v1_685_-_PVP01_0905800_-1	0.0942951
AMRU_Ao_GTGCGGTAGCGTCTAT	AMRU	Ao	3032	PvP01_09_v1_685_-_PVP01_0905800_-1	0.102082
AMRU_Ao_GTGCGGTCAGATTGCT	AMRU	Ao	4490	PvP01_09_v1_685_-_PVP01_0905800_-1	0.286882
AMRU_Ao_GTGCGGTGTAAGAGGA	AMRU	Ao	4216	PvP01_09_v1_685_-_PVP01_0905800_-1	0.0849798
AMRU_Ao_GTGCGGTTCAGCTGGC	AMRU	Ao	5587	PvP01_09_v1_685_-_PVP01_0905800_-1	0.731948
AMRU_Ao_GTGCTTCCACCGATAT	AMRU	Ao	2202	PvP01_09_v1_685_-_PVP01_0905800_-1	0.231965
AMRU_Ao_GTGCTTCCAGCTATTG	AMRU	Ao	2394	PvP01_09_v1_685_-_PVP01_0905800_-1	0.177504
AMRU_Ao_GTGCTTCCATCCAACA	AMRU	Ao	3929	PvP01_09_v1_685_-_PVP01_0905800_-1	0.408544
AMRU_Ao_GTGCTTCCATTAGCCA	AMRU	Ao	7316	PvP01_09_v1_685_-_PVP01_0905800_-1	0
AMRU_Ao_GTGCTTCGTAATCACC	AMRU	Ao	4474	PvP01_09_v1_685_-_PVP01_0905800_-1	0.118638
AMRU_Ao_GTGGGTCCACATAACC	AMRU	Ao	8549	PvP01_09_v1_685_-_PVP01_0905800_-1	0.0419472
AMRU_Ao_GTGGGTCCACATGTGT	AMRU	Ao	7073	PvP01_09_v1_685_-_PVP01_0905800_-1	0
AMRU_Ao_GTGGGTCCACGACTCG	AMRU	Ao	4211	PvP01_09_v1_685_-_PVP01_0905800_-1	0
AMRU_Ao_GTGGGTCCATTTCAGG	AMRU	Ao	4884	PvP01_09_v1_685_-_PVP01_0905800_-1	0.533333
AMRU_Ao_GTGGGTCGTAAGGGCT	AMRU	Ao	8800	PvP01_09_v1_685_-_PVP01_0905800_-1	0.128103
AMRU_Ao_GTGGGTCTCTGCTGCT	AMRU	Ao	4014	PvP01_09_v1_685_-_PVP01_0905800_-1	0.313553
AMRU_Ao_GTGTGCGGTCTCTTTA	AMRU	Ao	8547	PvP01_09_v1_685_-_PVP01_0905800_-1	0
AMRU_Ao_GTGTGCGGTGTTTGGT	AMRU	Ao	4233	PvP01_09_v1_685_-_PVP01_0905800_-1	0.809171
AMRU_Ao_GTGTTAGAGCGGATCA	AMRU	Ao	4305	PvP01_09_v1_685_-_PVP01_0905800_-1	0.928218
AMRU_Ao_GTGTTAGCACCAACCG	AMRU	Ao	5668	PvP01_09_v1_685_-_PVP01_0905800_-1	0.489293
AMRU_Ao_GTTAAGCAGGACTGGT	AMRU	Ao	1290	PvP01_09_v1_685_-_PVP01_0905800_-1	0
AMRU_Ao_GTTAAGCGTGACTACT	AMRU	Ao	5678	PvP01_09_v1_685_-_PVP01_0905800_-1	1.07023
AMRU_Ao_GTTAAGCTCTGATACG	AMRU	Ao	4405	PvP01_09_v1_685_-_PVP01_0905800_-1	0.299312
AMRU_Ao_GTTACAGAGCTAGCCC	AMRU	Ao	2418	PvP01_09_v1_685_-_PVP01_0905800_-1	0.061885
AMRU_Ao_GTTACAGAGGGTTCCC	AMRU	Ao	4650	PvP01_09_v1_685_-_PVP01_0905800_-1	0.809717
AMRU_Ao_GTTACAGCAGCTGCAC	AMRU	Ao	5418	PvP01_09_v1_685_-_PVP01_0905800_-1	0.321453
AMRU_Ao_GTTACAGGTGCCTGCA	AMRU	Ao	7856	PvP01_09_v1_685_-_PVP01_0905800_-1	0
AMRU_Ao_GTTACAGTCCACGTTC	AMRU	Ao	8271	PvP01_09_v1_685_-_PVP01_0905800_-1	0.0812183
AMRU_Ao_GTTACAGTCTTAGAGC	AMRU	Ao	4007	PvP01_09_v1_685_-_PVP01_0905800_-1	0.177794
AMRU_Ao_GTTCATTAGACTAGGC	AMRU	Ao	3623	PvP01_09_v1_685_-_PVP01_0905800_-1	0.311996
AMRU_Ao_GTTCATTAGTCGATAA	AMRU	Ao	1416	PvP01_09_v1_685_-_PVP01_0905800_-1	0.0891186
AMRU_Ao_GTTCATTCAAACTGTC	AMRU	Ao	1578	PvP01_09_v1_685_-_PVP01_0905800_-1	0.455878
AMRU_Ao_GTTCATTGTCTCTTAT	AMRU	Ao	1350	PvP01_09_v1_685_-_PVP01_0905800_-1	0.0935891
AMRU_Ao_GTTCATTTCGAATGCT	AMRU	Ao	4586	PvP01_09_v1_685_-_PVP01_0905800_-1	1.03074
AMRU_Ao_GTTCATTTCTGCAAGT	AMRU	Ao	3899	PvP01_09_v1_685_-_PVP01_0905800_-1	0.36062
AMRU_Ao_GTTCGGGAGCTATGCT	AMRU	Ao	3700	PvP01_09_v1_685_-_PVP01_0905800_-1	0.271444
AMRU_Ao_GTTCGGGGTTGGGACA	AMRU	Ao	4732	PvP01_09_v1_685_-_PVP01_0905800_-1	0.529253
AMRU_Ao_GTTCTCGAGGGTTCCC	AMRU	Ao	2314	PvP01_09_v1_685_-_PVP01_0905800_-1	0.124852
AMRU_Ao_GTTCTCGCACCATCCT	AMRU	Ao	3533	PvP01_09_v1_685_-_PVP01_0905800_-1	0.0765814
AMRU_Ao_GTTCTCGGTCGACTAT	AMRU	Ao	1651	PvP01_09_v1_685_-_PVP01_0905800_-1	0.0782228
AMRU_Ao_GTTCTCGTCATCGCTC	AMRU	Ao	4235	PvP01_09_v1_685_-_PVP01_0905800_-1	0.542164
AMRU_Ao_GTTTCTAAGCCCGAAA	AMRU	Ao	4687	PvP01_09_v1_685_-_PVP01_0905800_-1	0.678771
AMRU_Ao_GTTTCTAAGTATCGAA	AMRU	Ao	1921	PvP01_09_v1_685_-_PVP01_0905800_-1	0
AMRU_Ao_GTTTCTAGTCCGAAGA	AMRU	Ao	3300	PvP01_09_v1_685_-_PVP01_0905800_-1	0
AMRU_Ao_GTTTCTATCGGCGGTT	AMRU	Ao	8116	PvP01_09_v1_685_-_PVP01_0905800_-1	0
AMRU_Ao_TAAACCGCAGCTGTGC	AMRU	Ao	8885	PvP01_09_v1_685_-_PVP01_0905800_-1	0.108909
AMRU_Ao_TAAACCGCATTGAGCT	AMRU	Ao	5201	PvP01_09_v1_685_-_PVP01_0905800_-1	0.131747
AMRU_Ao_TAAACCGGTACAGTGG	AMRU	Ao	2693	PvP01_09_v1_685_-_PVP01_0905800_-1	0
AMRU_Ao_TAAACCGGTTCACGGC	AMRU	Ao	2040	PvP01_09_v1_685_-_PVP01_0905800_-1	0
AMRU_Ao_TAAACCGTCGATGAGG	AMRU	Ao	8573	PvP01_09_v1_685_-_PVP01_0905800_-1	0.109388
AMRU_Ao_TAAACCGTCGTACCGG	AMRU	Ao	4960	PvP01_09_v1_685_-_PVP01_0905800_-1	0.507485
AMRU_Ao_TAAACCGTCTAAGCCA	AMRU	Ao	7294	PvP01_09_v1_685_-_PVP01_0905800_-1	0
AMRU_Ao_TAAGAGACAACAACCT	AMRU	Ao	4967	PvP01_09_v1_685_-_PVP01_0905800_-1	0.149671
AMRU_Ao_TAAGAGACAATAACGA	AMRU	Ao	8097	PvP01_09_v1_685_-_PVP01_0905800_-1	0.0980392
AMRU_Ao_TAAGAGACATTTGCCC	AMRU	Ao	5446	PvP01_09_v1_685_-_PVP01_0905800_-1	0.279174
AMRU_Ao_TAAGAGATCCTAGGGC	AMRU	Ao	1319	PvP01_09_v1_685_-_PVP01_0905800_-1	0.0775855
AMRU_Ao_TAAGCGTCAGCCAGAA	AMRU	Ao	4208	PvP01_09_v1_685_-_PVP01_0905800_-1	0.107718
AMRU_Ao_TAAGCGTGTCGGCTCA	AMRU	Ao	7868	PvP01_09_v1_685_-_PVP01_0905800_-1	0.190585
AMRU_Ao_TAAGTGCAGGTTACCT	AMRU	Ao	5369	PvP01_09_v1_685_-_PVP01_0905800_-1	0.428229
AMRU_Ao_TAAGTGCAGTGAACGC	AMRU	Ao	3529	PvP01_09_v1_685_-_PVP01_0905800_-1	0.120885
AMRU_Ao_TAAGTGCTCAGAGCTT	AMRU	Ao	725	PvP01_09_v1_685_-_PVP01_0905800_-1	0.185977
AMRU_Ao_TAAGTGCTCCCTGACT	AMRU	Ao	1575	PvP01_09_v1_685_-_PVP01_0905800_-1	0.140726
AMRU_Ao_TACACGACACCAGCAC	AMRU	Ao	1621	PvP01_09_v1_685_-_PVP01_0905800_-1	0.156568
AMRU_Ao_TACAGTGAGAAACGAG	AMRU	Ao	5331	PvP01_09_v1_685_-_PVP01_0905800_-1	0
AMRU_Ao_TACAGTGTCCTCATTA	AMRU	Ao	2293	PvP01_09_v1_685_-_PVP01_0905800_-1	0.112733
AMRU_Ao_TACAGTGTCCTGCAGG	AMRU	Ao	1485	PvP01_09_v1_685_-_PVP01_0905800_-1	0.0690846
AMRU_Ao_TACCTATAGAGTTGGC	AMRU	Ao	8603	PvP01_09_v1_685_-_PVP01_0905800_-1	0.159898
AMRU_Ao_TACCTTAAGCTCCTCT	AMRU	Ao	7480	PvP01_09_v1_685_-_PVP01_0905800_-1	0
AMRU_Ao_TACCTTACAAATTGCC	AMRU	Ao	6641	PvP01_09_v1_685_-_PVP01_0905800_-1	0.40971
AMRU_Ao_TACCTTATCAGCACAT	AMRU	Ao	3638	PvP01_09_v1_685_-_PVP01_0905800_-1	0.358551
AMRU_Ao_TACCTTATCTGCCAGG	AMRU	Ao	8303	PvP01_09_v1_685_-_PVP01_0905800_-1	0.0939091
AMRU_Ao_TACGGATAGTGCCAGA	AMRU	Ao	7991	PvP01_09_v1_685_-_PVP01_0905800_-1	0.111086
AMRU_Ao_TACGGATCAGTTCCCT	AMRU	Ao	5072	PvP01_09_v1_685_-_PVP01_0905800_-1	1.288
AMRU_Ao_TACGGATGTTTGACAC	AMRU	Ao	8684	PvP01_09_v1_685_-_PVP01_0905800_-1	0.157841
AMRU_Ao_TACGGATTCACCGTAA	AMRU	Ao	4811	PvP01_09_v1_685_-_PVP01_0905800_-1	0.566974
AMRU_Ao_TACGGGCAGCGATAGC	AMRU	Ao	4118	PvP01_09_v1_685_-_PVP01_0905800_-1	0.187196
AMRU_Ao_TACGGGCCAAGGACAC	AMRU	Ao	2512	PvP01_09_v1_685_-_PVP01_0905800_-1	0
AMRU_Ao_TACGGGCCACTGAAGG	AMRU	Ao	6409	PvP01_09_v1_685_-_PVP01_0905800_-1	0.700804
AMRU_Ao_TACGGGCGTCGTCTTC	AMRU	Ao	8951	PvP01_09_v1_685_-_PVP01_0905800_-1	0
AMRU_Ao_TACGGGCGTGCAGACA	AMRU	Ao	3580	PvP01_09_v1_685_-_PVP01_0905800_-1	0.23729
AMRU_Ao_TACGGGCGTTGTACAC	AMRU	Ao	2770	PvP01_09_v1_685_-_PVP01_0905800_-1	0.0402447
AMRU_Ao_TACGGTAAGAGGGCTT	AMRU	Ao	3067	PvP01_09_v1_685_-_PVP01_0905800_-1	0.257025
AMRU_Ao_TACGGTAAGGTGCTAG	AMRU	Ao	2221	PvP01_09_v1_685_-_PVP01_0905800_-1	0.175485
AMRU_Ao_TACGGTAAGTGTCCAT	AMRU	Ao	5675	PvP01_09_v1_685_-_PVP01_0905800_-1	0.587783
AMRU_Ao_TACGGTATCATGCTCC	AMRU	Ao	6672	PvP01_09_v1_685_-_PVP01_0905800_-1	0.429969
AMRU_Ao_TACTCATAGTGGAGAA	AMRU	Ao	5212	PvP01_09_v1_685_-_PVP01_0905800_-1	1.47037
AMRU_Ao_TACTCATGTGCAGGTA	AMRU	Ao	8371	PvP01_09_v1_685_-_PVP01_0905800_-1	0.0904875
AMRU_Ao_TACTCGCGTCCAGTGC	AMRU	Ao	8859	PvP01_09_v1_685_-_PVP01_0905800_-1	0.121945
AMRU_Ao_TACTCGCTCGATAGAA	AMRU	Ao	7296	PvP01_09_v1_685_-_PVP01_0905800_-1	0
AMRU_Ao_TACTCGCTCGGAAACG	AMRU	Ao	4840	PvP01_09_v1_685_-_PVP01_0905800_-1	0.454623
AMRU_Ao_TACTTACGTCATCCCT	AMRU	Ao	266	PvP01_09_v1_685_-_PVP01_0905800_-1	0
AMRU_Ao_TACTTGTAGGCCGAAT	AMRU	Ao	5276	PvP01_09_v1_685_-_PVP01_0905800_-1	0.329986
AMRU_Ao_TACTTGTAGTGGTAGC	AMRU	Ao	2959	PvP01_09_v1_685_-_PVP01_0905800_-1	0
AMRU_Ao_TACTTGTGTAAAGGAG	AMRU	Ao	3097	PvP01_09_v1_685_-_PVP01_0905800_-1	0
AMRU_Ao_TACTTGTGTCCGTTAA	AMRU	Ao	3739	PvP01_09_v1_685_-_PVP01_0905800_-1	0.0969791
AMRU_Ao_TACTTGTTCACCTTAT	AMRU	Ao	4236	PvP01_09_v1_685_-_PVP01_0905800_-1	0.118708
AMRU_Ao_TAGACCACAATTCCTT	AMRU	Ao	1459	PvP01_09_v1_685_-_PVP01_0905800_-1	0.297903
AMRU_Ao_TAGAGCTGTCGAAAGC	AMRU	Ao	7130	PvP01_09_v1_685_-_PVP01_0905800_-1	0
AMRU_Ao_TAGAGCTGTCTCTTTA	AMRU	Ao	2665	PvP01_09_v1_685_-_PVP01_0905800_-1	0.0490701
AMRU_Ao_TAGCCGGAGCGTTGCC	AMRU	Ao	7684	PvP01_09_v1_685_-_PVP01_0905800_-1	0
AMRU_Ao_TAGCCGGAGTACACCT	AMRU	Ao	3027	PvP01_09_v1_685_-_PVP01_0905800_-1	0
AMRU_Ao_TAGCCGGGTAGCTTGT	AMRU	Ao	4763	PvP01_09_v1_685_-_PVP01_0905800_-1	0.605427
AMRU_Ao_TAGCCGGGTCATCCCT	AMRU	Ao	5696	PvP01_09_v1_685_-_PVP01_0905800_-1	0.966626
AMRU_Ao_TAGCCGGGTTTGTGTG	AMRU	Ao	3934	PvP01_09_v1_685_-_PVP01_0905800_-1	0.296223
AMRU_Ao_TAGCCGGTCATAGCAC	AMRU	Ao	3526	PvP01_09_v1_685_-_PVP01_0905800_-1	0.138571
AMRU_Ao_TAGCCGGTCCTTGCCA	AMRU	Ao	5100	PvP01_09_v1_685_-_PVP01_0905800_-1	0.424577
AMRU_Ao_TAGGCATAGCGGATCA	AMRU	Ao	4785	PvP01_09_v1_685_-_PVP01_0905800_-1	1.23136
AMRU_Ao_TAGGCATGTAGCTTGT	AMRU	Ao	4645	PvP01_09_v1_685_-_PVP01_0905800_-1	0.212965
AMRU_Ao_TAGTGGTAGGGCTTCC	AMRU	Ao	3410	PvP01_09_v1_685_-_PVP01_0905800_-1	0.0795735
AMRU_Ao_TAGTGGTGTTAGGGTG	AMRU	Ao	2743	PvP01_09_v1_685_-_PVP01_0905800_-1	0.257776
AMRU_Ao_TAGTGGTTCGAATCCA	AMRU	Ao	3141	PvP01_09_v1_685_-_PVP01_0905800_-1	0.68918
AMRU_Ao_TAGTTGGGTTGTCGCG	AMRU	Ao	3667	PvP01_09_v1_685_-_PVP01_0905800_-1	0
AMRU_Ao_TAGTTGGTCTCGCTTG	AMRU	Ao	4394	PvP01_09_v1_685_-_PVP01_0905800_-1	0
AMRU_Ao_TATCAGGAGTCGTACT	AMRU	Ao	3320	PvP01_09_v1_685_-_PVP01_0905800_-1	0.518457
AMRU_Ao_TATCAGGCAGTCGATT	AMRU	Ao	2191	PvP01_09_v1_685_-_PVP01_0905800_-1	0.119424
AMRU_Ao_TATCAGGGTATGGTTC	AMRU	Ao	8888	PvP01_09_v1_685_-_PVP01_0905800_-1	0
AMRU_Ao_TATCAGGGTCTCCCTA	AMRU	Ao	3279	PvP01_09_v1_685_-_PVP01_0905800_-1	0
AMRU_Ao_TATCTCAAGGTGGGTT	AMRU	Ao	5644	PvP01_09_v1_685_-_PVP01_0905800_-1	0.570125
AMRU_Ao_TATCTCACAAAGGAAG	AMRU	Ao	3920	PvP01_09_v1_685_-_PVP01_0905800_-1	0.201613
AMRU_Ao_TATCTCACACAGCGTC	AMRU	Ao	5092	PvP01_09_v1_685_-_PVP01_0905800_-1	0.121788
AMRU_Ao_TATCTCACAGTGGGAT	AMRU	Ao	7893	PvP01_09_v1_685_-_PVP01_0905800_-1	0.0597872
AMRU_Ao_TATCTCAGTCGCGGTT	AMRU	Ao	2471	PvP01_09_v1_685_-_PVP01_0905800_-1	0.203321
AMRU_Ao_TATGCCCAGTGTACGG	AMRU	Ao	8750	PvP01_09_v1_685_-_PVP01_0905800_-1	0.0486429
AMRU_Ao_TATGCCCCACTTACGA	AMRU	Ao	6432	PvP01_09_v1_685_-_PVP01_0905800_-1	0.529101
AMRU_Ao_TATGCCCTCAACACGT	AMRU	Ao	35	PvP01_09_v1_685_-_PVP01_0905800_-1	0
AMRU_Ao_TATTACCCAAGTCTAC	AMRU	Ao	4844	PvP01_09_v1_685_-_PVP01_0905800_-1	0.614358
AMRU_Ao_TCAACGAAGTCCTCCT	AMRU	Ao	3681	PvP01_09_v1_685_-_PVP01_0905800_-1	0.31864
AMRU_Ao_TCAACGATCCCGACTT	AMRU	Ao	4737	PvP01_09_v1_685_-_PVP01_0905800_-1	0.586396
AMRU_Ao_TCAACGATCTTTAGTC	AMRU	Ao	2455	PvP01_09_v1_685_-_PVP01_0905800_-1	0
AMRU_Ao_TCAATCTCACCGTTGG	AMRU	Ao	3395	PvP01_09_v1_685_-_PVP01_0905800_-1	0.249913
AMRU_Ao_TCAATCTCAGACAGGT	AMRU	Ao	4310	PvP01_09_v1_685_-_PVP01_0905800_-1	0.728029
AMRU_Ao_TCAATCTCATCCCATC	AMRU	Ao	2556	PvP01_09_v1_685_-_PVP01_0905800_-1	0.198557
AMRU_Ao_TCAATCTTCTATCGCC	AMRU	Ao	5491	PvP01_09_v1_685_-_PVP01_0905800_-1	0.553272
AMRU_Ao_TCAATCTTCTGGTTCC	AMRU	Ao	3488	PvP01_09_v1_685_-_PVP01_0905800_-1	0.0620617
AMRU_Ao_TCACAAGCATCAGTCA	AMRU	Ao	3675	PvP01_09_v1_685_-_PVP01_0905800_-1	0.281468
AMRU_Ao_TCACAAGGTAGCTTGT	AMRU	Ao	8134	PvP01_09_v1_685_-_PVP01_0905800_-1	0.0630756
AMRU_Ao_TCACAAGGTTGAGTTC	AMRU	Ao	4243	PvP01_09_v1_685_-_PVP01_0905800_-1	0.41206
AMRU_Ao_TCACAAGTCCCTTGTG	AMRU	Ao	5839	PvP01_09_v1_685_-_PVP01_0905800_-1	0.842993
AMRU_Ao_TCACAAGTCTGATACG	AMRU	Ao	4928	PvP01_09_v1_685_-_PVP01_0905800_-1	0.216844
AMRU_Ao_TCACGAAAGTGTGAAT	AMRU	Ao	2401	PvP01_09_v1_685_-_PVP01_0905800_-1	0.351617
AMRU_Ao_TCACGAACATTCTTAC	AMRU	Ao	5520	PvP01_09_v1_685_-_PVP01_0905800_-1	0.249917
AMRU_Ao_TCACGAATCTTGCAAG	AMRU	Ao	8093	PvP01_09_v1_685_-_PVP01_0905800_-1	0.123808
AMRU_Ao_TCAGATGGTAGAGCTG	AMRU	Ao	4291	PvP01_09_v1_685_-_PVP01_0905800_-1	0.096768
AMRU_Ao_TCAGATGTCTTCGAGA	AMRU	Ao	5218	PvP01_09_v1_685_-_PVP01_0905800_-1	1.51315
AMRU_Ao_TCAGCAAAGACGACGT	AMRU	Ao	7617	PvP01_09_v1_685_-_PVP01_0905800_-1	0
AMRU_Ao_TCAGCAACATACTCTT	AMRU	Ao	3984	PvP01_09_v1_685_-_PVP01_0905800_-1	0.167056
AMRU_Ao_TCAGCAAGTACTTAGC	AMRU	Ao	5630	PvP01_09_v1_685_-_PVP01_0905800_-1	0.565904
AMRU_Ao_TCAGCTCAGACTACAA	AMRU	Ao	4691	PvP01_09_v1_685_-_PVP01_0905800_-1	0.299431
AMRU_Ao_TCAGCTCCACGGCGTT	AMRU	Ao	3294	PvP01_09_v1_685_-_PVP01_0905800_-1	0.329381
AMRU_Ao_TCAGCTCGTCATCGGC	AMRU	Ao	7422	PvP01_09_v1_685_-_PVP01_0905800_-1	0
AMRU_Ao_TCAGCTCGTGGTTTCA	AMRU	Ao	2754	PvP01_09_v1_685_-_PVP01_0905800_-1	0.110742
AMRU_Ao_TCAGGATTCTGATACG	AMRU	Ao	1177	PvP01_09_v1_685_-_PVP01_0905800_-1	0.0761789
AMRU_Ao_TCAGGATTCTTCTGGC	AMRU	Ao	3391	PvP01_09_v1_685_-_PVP01_0905800_-1	0.0643998
AMRU_Ao_TCATTACGTTAGAACA	AMRU	Ao	5231	PvP01_09_v1_685_-_PVP01_0905800_-1	0.534188
AMRU_Ao_TCATTACTCAACGAAA	AMRU	Ao	4108	PvP01_09_v1_685_-_PVP01_0905800_-1	0.0388546
AMRU_Ao_TCATTTGAGCACCGTC	AMRU	Ao	3887	PvP01_09_v1_685_-_PVP01_0905800_-1	0
AMRU_Ao_TCATTTGAGCCGGTAA	AMRU	Ao	4739	PvP01_09_v1_685_-_PVP01_0905800_-1	0.556741
AMRU_Ao_TCATTTGAGGATGTAT	AMRU	Ao	6669	PvP01_09_v1_685_-_PVP01_0905800_-1	0.12335
AMRU_Ao_TCCACACCAAATCCGT	AMRU	Ao	8756	PvP01_09_v1_685_-_PVP01_0905800_-1	0.0277123
AMRU_Ao_TCCACACCACGTCAGC	AMRU	Ao	3892	PvP01_09_v1_685_-_PVP01_0905800_-1	0.458821
AMRU_Ao_TCCACACTCTGCCAGG	AMRU	Ao	2823	PvP01_09_v1_685_-_PVP01_0905800_-1	0.158378
AMRU_Ao_TCCCGATCAAGTAGTA	AMRU	Ao	4462	PvP01_09_v1_685_-_PVP01_0905800_-1	1.10271
AMRU_Ao_TCCCGATCATAAGACA	AMRU	Ao	1506	PvP01_09_v1_685_-_PVP01_0905800_-1	0.110717
AMRU_Ao_TCCCGATGTACGAAAT	AMRU	Ao	8279	PvP01_09_v1_685_-_PVP01_0905800_-1	0.10979
AMRU_Ao_TCCCGATGTCGACTGC	AMRU	Ao	1589	PvP01_09_v1_685_-_PVP01_0905800_-1	0.172157
AMRU_Ao_TCGCGAGGTCTAAACC	AMRU	Ao	4839	PvP01_09_v1_685_-_PVP01_0905800_-1	0.398001
AMRU_Ao_TCGCGTTAGCTAGTGG	AMRU	Ao	3489	PvP01_09_v1_685_-_PVP01_0905800_-1	0
AMRU_Ao_TCGCGTTCATCATCCC	AMRU	Ao	4133	PvP01_09_v1_685_-_PVP01_0905800_-1	0.337553
AMRU_Ao_TCGCGTTTCAAGGCTT	AMRU	Ao	8092	PvP01_09_v1_685_-_PVP01_0905800_-1	0.0935716
AMRU_Ao_TCGGGACAGTCCCACG	AMRU	Ao	8641	PvP01_09_v1_685_-_PVP01_0905800_-1	0.0518417
AMRU_Ao_TCGGGACAGTTATCGC	AMRU	Ao	5402	PvP01_09_v1_685_-_PVP01_0905800_-1	0.0847565
AMRU_Ao_TCGGGACCAGTATAAG	AMRU	Ao	5552	PvP01_09_v1_685_-_PVP01_0905800_-1	0.110254
AMRU_Ao_TCGGGACGTCATATGC	AMRU	Ao	3891	PvP01_09_v1_685_-_PVP01_0905800_-1	0.11084
AMRU_Ao_TCGGGACTCATCACCC	AMRU	Ao	2300	PvP01_09_v1_685_-_PVP01_0905800_-1	0.0554785
AMRU_Ao_TCGGGACTCTTAGAGC	AMRU	Ao	2706	PvP01_09_v1_685_-_PVP01_0905800_-1	0.051913
AMRU_Ao_TCGGTAACACAGACTT	AMRU	Ao	2841	PvP01_09_v1_685_-_PVP01_0905800_-1	0.0540336
AMRU_Ao_TCGGTAAGTAAACGCG	AMRU	Ao	3058	PvP01_09_v1_685_-_PVP01_0905800_-1	0
AMRU_Ao_TCGGTAAGTCACACGC	AMRU	Ao	5414	PvP01_09_v1_685_-_PVP01_0905800_-1	0.539568
AMRU_Ao_TCGGTAAGTTAAGGGC	AMRU	Ao	3732	PvP01_09_v1_685_-_PVP01_0905800_-1	0.189729
AMRU_Ao_TCGTACCCAGCGTCCA	AMRU	Ao	5126	PvP01_09_v1_685_-_PVP01_0905800_-1	0.633948
AMRU_Ao_TCGTACCCATATACCG	AMRU	Ao	1644	PvP01_09_v1_685_-_PVP01_0905800_-1	0.136968
AMRU_Ao_TCGTACCGTTCAGTAC	AMRU	Ao	1693	PvP01_09_v1_685_-_PVP01_0905800_-1	0
AMRU_Ao_TCGTACCTCAAACAAG	AMRU	Ao	8157	PvP01_09_v1_685_-_PVP01_0905800_-1	0.283809
AMRU_Ao_TCGTAGAGTCCAGTAT	AMRU	Ao	2078	PvP01_09_v1_685_-_PVP01_0905800_-1	0.300752
AMRU_Ao_TCGTAGATCCGTCAAA	AMRU	Ao	1605	PvP01_09_v1_685_-_PVP01_0905800_-1	0
AMRU_Ao_TCGTAGATCGCTTGTC	AMRU	Ao	7636	PvP01_09_v1_685_-_PVP01_0905800_-1	0
AMRU_Ao_TCGTAGATCTACTATC	AMRU	Ao	6475	PvP01_09_v1_685_-_PVP01_0905800_-1	0.750443
AMRU_Ao_TCGTAGATCTTGTCAT	AMRU	Ao	3872	PvP01_09_v1_685_-_PVP01_0905800_-1	0.0700452
AMRU_Ao_TCTATTGAGGAACTGC	AMRU	Ao	5623	PvP01_09_v1_685_-_PVP01_0905800_-1	1.12218
AMRU_Ao_TCTATTGAGTGAATTG	AMRU	Ao	4518	PvP01_09_v1_685_-_PVP01_0905800_-1	0.0976849
AMRU_Ao_TCTATTGCAAATACAG	AMRU	Ao	2142	PvP01_09_v1_685_-_PVP01_0905800_-1	0.123663
AMRU_Ao_TCTATTGCAATCGGTT	AMRU	Ao	2346	PvP01_09_v1_685_-_PVP01_0905800_-1	0.541301
AMRU_Ao_TCTATTGCATGGTCAT	AMRU	Ao	2464	PvP01_09_v1_685_-_PVP01_0905800_-1	0.0597122
AMRU_Ao_TCTATTGGTCCGTCAG	AMRU	Ao	2554	PvP01_09_v1_685_-_PVP01_0905800_-1	0
AMRU_Ao_TCTATTGGTCTGCAAT	AMRU	Ao	3846	PvP01_09_v1_685_-_PVP01_0905800_-1	0.0685307
AMRU_Ao_TCTATTGGTTCACCTC	AMRU	Ao	2042	PvP01_09_v1_685_-_PVP01_0905800_-1	0
AMRU_Ao_TCTATTGTCTCCAGGG	AMRU	Ao	4267	PvP01_09_v1_685_-_PVP01_0905800_-1	0.0882223
AMRU_Ao_TCTATTGTCTCGTTTA	AMRU	Ao	9068	PvP01_09_v1_685_-_PVP01_0905800_-1	0.120715
AMRU_Ao_TCTCATACAGTCGTGC	AMRU	Ao	1720	PvP01_09_v1_685_-_PVP01_0905800_-1	0.10009
AMRU_Ao_TCTCATAGTTTGGGCC	AMRU	Ao	4531	PvP01_09_v1_685_-_PVP01_0905800_-1	0.264215
AMRU_Ao_TCTCATATCTAACGGT	AMRU	Ao	2257	PvP01_09_v1_685_-_PVP01_0905800_-1	0.171674
AMRU_Ao_TCTCTAAAGTCATGCT	AMRU	Ao	5132	PvP01_09_v1_685_-_PVP01_0905800_-1	0
AMRU_Ao_TCTGAGAGTGACGCCT	AMRU	Ao	8160	PvP01_09_v1_685_-_PVP01_0905800_-1	0.114534
AMRU_Ao_TCTGAGATCATAAAGG	AMRU	Ao	4713	PvP01_09_v1_685_-_PVP01_0905800_-1	0.752106
AMRU_Ao_TCTGGAAAGCGTAGTG	AMRU	Ao	6907	PvP01_09_v1_685_-_PVP01_0905800_-1	0.340483
AMRU_Ao_TCTGGAAGTCTGGTCG	AMRU	Ao	2322	PvP01_09_v1_685_-_PVP01_0905800_-1	0
AMRU_Ao_TCTTCGGAGCGATATA	AMRU	Ao	7920	PvP01_09_v1_685_-_PVP01_0905800_-1	0
AMRU_Ao_TCTTCGGAGCTATGCT	AMRU	Ao	9164	PvP01_09_v1_685_-_PVP01_0905800_-1	0
AMRU_Ao_TCTTCGGCATGAGCGA	AMRU	Ao	4898	PvP01_09_v1_685_-_PVP01_0905800_-1	0.319652
AMRU_Ao_TCTTCGGTCAACCAAC	AMRU	Ao	6425	PvP01_09_v1_685_-_PVP01_0905800_-1	0.643211
AMRU_Ao_TCTTTCCAGGGTGTGT	AMRU	Ao	5104	PvP01_09_v1_685_-_PVP01_0905800_-1	0.633744
AMRU_Ao_TCTTTCCCACCCATTC	AMRU	Ao	4210	PvP01_09_v1_685_-_PVP01_0905800_-1	0.371126
AMRU_Ao_TGAAAGACACGGTGTC	AMRU	Ao	2869	PvP01_09_v1_685_-_PVP01_0905800_-1	0
AMRU_Ao_TGAAAGACAGCCTGTG	AMRU	Ao	8308	PvP01_09_v1_685_-_PVP01_0905800_-1	0.226578
AMRU_Ao_TGAAAGACATCCCACT	AMRU	Ao	6431	PvP01_09_v1_685_-_PVP01_0905800_-1	0.277633
AMRU_Ao_TGAAAGATCCTCGCAT	AMRU	Ao	4164	PvP01_09_v1_685_-_PVP01_0905800_-1	0.124224
AMRU_Ao_TGACAACAGTTCGCGC	AMRU	Ao	4950	PvP01_09_v1_685_-_PVP01_0905800_-1	0.0551511
AMRU_Ao_TGACAACTCATTCACT	AMRU	Ao	5703	PvP01_09_v1_685_-_PVP01_0905800_-1	0.787836
AMRU_Ao_TGACAACTCCCTAACC	AMRU	Ao	8687	PvP01_09_v1_685_-_PVP01_0905800_-1	0.140934
AMRU_Ao_TGACGGCAGACAATAC	AMRU	Ao	4545	PvP01_09_v1_685_-_PVP01_0905800_-1	1.64806
AMRU_Ao_TGACGGCAGCTAAACA	AMRU	Ao	4620	PvP01_09_v1_685_-_PVP01_0905800_-1	0.79652
AMRU_Ao_TGACGGCAGTCGATAA	AMRU	Ao	2811	PvP01_09_v1_685_-_PVP01_0905800_-1	0.0572508
AMRU_Ao_TGACGGCGTGGGTATG	AMRU	Ao	8080	PvP01_09_v1_685_-_PVP01_0905800_-1	0.313709
AMRU_Ao_TGACTAGTCGCGCCAA	AMRU	Ao	2358	PvP01_09_v1_685_-_PVP01_0905800_-1	0.0695604
AMRU_Ao_TGACTTTTCGTAGGTT	AMRU	Ao	3810	PvP01_09_v1_685_-_PVP01_0905800_-1	0
AMRU_Ao_TGAGAGGCATCCCATC	AMRU	Ao	3330	PvP01_09_v1_685_-_PVP01_0905800_-1	0.190718
AMRU_Ao_TGAGAGGGTGACAAAT	AMRU	Ao	3868	PvP01_09_v1_685_-_PVP01_0905800_-1	0
AMRU_Ao_TGAGCATAGGAGTTTA	AMRU	Ao	5321	PvP01_09_v1_685_-_PVP01_0905800_-1	0.471254
AMRU_Ao_TGAGCATCACCCATTC	AMRU	Ao	2937	PvP01_09_v1_685_-_PVP01_0905800_-1	0.075861
AMRU_Ao_TGAGCATCAGCGTCCA	AMRU	Ao	6197	PvP01_09_v1_685_-_PVP01_0905800_-1	0.736341
AMRU_Ao_TGAGCATGTAGCTCCG	AMRU	Ao	9159	PvP01_09_v1_685_-_PVP01_0905800_-1	0
AMRU_Ao_TGAGCATGTTGCGTTA	AMRU	Ao	4044	PvP01_09_v1_685_-_PVP01_0905800_-1	0.204179
AMRU_Ao_TGAGCATTCGTTGCCT	AMRU	Ao	6415	PvP01_09_v1_685_-_PVP01_0905800_-1	0.978675
AMRU_Ao_TGAGCCGCAATAGCGG	AMRU	Ao	3552	PvP01_09_v1_685_-_PVP01_0905800_-1	0
AMRU_Ao_TGAGCCGGTCGCTTTC	AMRU	Ao	300	PvP01_09_v1_685_-_PVP01_0905800_-1	0
AMRU_Ao_TGAGCCGGTGAGTATA	AMRU	Ao	8882	PvP01_09_v1_685_-_PVP01_0905800_-1	0.0987459
AMRU_Ao_TGAGGGATCACATACG	AMRU	Ao	3811	PvP01_09_v1_685_-_PVP01_0905800_-1	1.08401
AMRU_Ao_TGAGGGATCTTGGGTA	AMRU	Ao	5166	PvP01_09_v1_685_-_PVP01_0905800_-1	0.543237
AMRU_Ao_TGATTTCTCACAAACC	AMRU	Ao	8897	PvP01_09_v1_685_-_PVP01_0905800_-1	0.302638
AMRU_Ao_TGATTTCTCTCCAACC	AMRU	Ao	4888	PvP01_09_v1_685_-_PVP01_0905800_-1	0.761963
AMRU_Ao_TGATTTCTCTGCAAGT	AMRU	Ao	3851	PvP01_09_v1_685_-_PVP01_0905800_-1	0.0498132
AMRU_Ao_TGCACCTAGACGACGT	AMRU	Ao	114	PvP01_09_v1_685_-_PVP01_0905800_-1	0
AMRU_Ao_TGCACCTAGCTTCGCG	AMRU	Ao	3832	PvP01_09_v1_685_-_PVP01_0905800_-1	0.144009
AMRU_Ao_TGCACCTAGGCTCTTA	AMRU	Ao	8013	PvP01_09_v1_685_-_PVP01_0905800_-1	0.0375333
AMRU_Ao_TGCACCTGTGCAGACA	AMRU	Ao	5601	PvP01_09_v1_685_-_PVP01_0905800_-1	1.16291
AMRU_Ao_TGCACCTTCTTCTGGC	AMRU	Ao	7952	PvP01_09_v1_685_-_PVP01_0905800_-1	0.154823
AMRU_Ao_TGCCAAAAGCGATTCT	AMRU	Ao	4115	PvP01_09_v1_685_-_PVP01_0905800_-1	0.466517
AMRU_Ao_TGCCCATAGATCGATA	AMRU	Ao	5313	PvP01_09_v1_685_-_PVP01_0905800_-1	0.291361
AMRU_Ao_TGCCCATAGCCGATTT	AMRU	Ao	108	PvP01_09_v1_685_-_PVP01_0905800_-1	0
AMRU_Ao_TGCCCATCAGACGCCT	AMRU	Ao	3576	PvP01_09_v1_685_-_PVP01_0905800_-1	0.477685
AMRU_Ao_TGCCCATGTAGGAGTC	AMRU	Ao	2595	PvP01_09_v1_685_-_PVP01_0905800_-1	0
AMRU_Ao_TGCCCATGTCTAACGT	AMRU	Ao	4390	PvP01_09_v1_685_-_PVP01_0905800_-1	0.299555
AMRU_Ao_TGCCCATGTTCGCTAA	AMRU	Ao	5539	PvP01_09_v1_685_-_PVP01_0905800_-1	0.965531
AMRU_Ao_TGCCCTAAGGATGGAA	AMRU	Ao	340	PvP01_09_v1_685_-_PVP01_0905800_-1	0
AMRU_Ao_TGCCCTACAAGCGCTC	AMRU	Ao	8436	PvP01_09_v1_685_-_PVP01_0905800_-1	0.229956
AMRU_Ao_TGCCCTACACTCTGTC	AMRU	Ao	8611	PvP01_09_v1_685_-_PVP01_0905800_-1	0.186335
AMRU_Ao_TGCCCTACATGGTTGT	AMRU	Ao	8941	PvP01_09_v1_685_-_PVP01_0905800_-1	0
AMRU_Ao_TGCCCTAGTTAAGATG	AMRU	Ao	330	PvP01_09_v1_685_-_PVP01_0905800_-1	0
AMRU_Ao_TGCGCAGAGGCGACAT	AMRU	Ao	8212	PvP01_09_v1_685_-_PVP01_0905800_-1	0.114859
AMRU_Ao_TGCGCAGCAAGTCTAC	AMRU	Ao	1561	PvP01_09_v1_685_-_PVP01_0905800_-1	0.0793021
AMRU_Ao_TGCGCAGCATGAAGTA	AMRU	Ao	2347	PvP01_09_v1_685_-_PVP01_0905800_-1	0.414365
AMRU_Ao_TGCGCAGGTAATAGCA	AMRU	Ao	5145	PvP01_09_v1_685_-_PVP01_0905800_-1	0.435557
AMRU_Ao_TGCGCAGTCAGGATCT	AMRU	Ao	7874	PvP01_09_v1_685_-_PVP01_0905800_-1	0.0438616
AMRU_Ao_TGCGCAGTCCAGATCA	AMRU	Ao	4787	PvP01_09_v1_685_-_PVP01_0905800_-1	1.45762
AMRU_Ao_TGCGCAGTCGGCGCTA	AMRU	Ao	4741	PvP01_09_v1_685_-_PVP01_0905800_-1	0.299088
AMRU_Ao_TGCGCAGTCTCGCATC	AMRU	Ao	1389	PvP01_09_v1_685_-_PVP01_0905800_-1	0
AMRU_Ao_TGCGGGTAGCGCCTCA	AMRU	Ao	5515	PvP01_09_v1_685_-_PVP01_0905800_-1	0.38916
AMRU_Ao_TGCGTGGAGAAGGACA	AMRU	Ao	8680	PvP01_09_v1_685_-_PVP01_0905800_-1	0.0831439
AMRU_Ao_TGCGTGGAGCTAACAA	AMRU	Ao	351	PvP01_09_v1_685_-_PVP01_0905800_-1	0
AMRU_Ao_TGCGTGGAGTATTGGA	AMRU	Ao	2682	PvP01_09_v1_685_-_PVP01_0905800_-1	0
AMRU_Ao_TGCGTGGCACGTTGGC	AMRU	Ao	2769	PvP01_09_v1_685_-_PVP01_0905800_-1	0.20887
AMRU_Ao_TGCGTGGTCATGCTCC	AMRU	Ao	5987	PvP01_09_v1_685_-_PVP01_0905800_-1	1.03426
AMRU_Ao_TGCTACCAGTCCAGGA	AMRU	Ao	6037	PvP01_09_v1_685_-_PVP01_0905800_-1	1.63858
AMRU_Ao_TGCTACCCAATAACGA	AMRU	Ao	8862	PvP01_09_v1_685_-_PVP01_0905800_-1	0.042489
AMRU_Ao_TGCTACCCACTCAGGC	AMRU	Ao	8339	PvP01_09_v1_685_-_PVP01_0905800_-1	0.0674203
AMRU_Ao_TGCTACCCAGATCGGA	AMRU	Ao	9073	PvP01_09_v1_685_-_PVP01_0905800_-1	0.0851136
AMRU_Ao_TGCTACCGTTCACGGC	AMRU	Ao	4167	PvP01_09_v1_685_-_PVP01_0905800_-1	0.75815
AMRU_Ao_TGCTACCTCACAAACC	AMRU	Ao	6310	PvP01_09_v1_685_-_PVP01_0905800_-1	1.25379
AMRU_Ao_TGCTACCTCTGGTTCC	AMRU	Ao	3471	PvP01_09_v1_685_-_PVP01_0905800_-1	0.408886
AMRU_Ao_TGCTGCTGTCCCTACT	AMRU	Ao	1777	PvP01_09_v1_685_-_PVP01_0905800_-1	0
AMRU_Ao_TGCTGCTGTCTGCAAT	AMRU	Ao	3932	PvP01_09_v1_685_-_PVP01_0905800_-1	0.570071
AMRU_Ao_TGCTGCTGTCTGCCAG	AMRU	Ao	5315	PvP01_09_v1_685_-_PVP01_0905800_-1	0.23655
AMRU_Ao_TGCTGCTTCCGCAAGC	AMRU	Ao	5197	PvP01_09_v1_685_-_PVP01_0905800_-1	0.861772
AMRU_Ao_TGGACGCAGTGAAGAG	AMRU	Ao	8786	PvP01_09_v1_685_-_PVP01_0905800_-1	0.0866802
AMRU_Ao_TGGACGCTCAGTGCAT	AMRU	Ao	8625	PvP01_09_v1_685_-_PVP01_0905800_-1	0.126173
AMRU_Ao_TGGCCAGAGAGCCCAA	AMRU	Ao	2854	PvP01_09_v1_685_-_PVP01_0905800_-1	0
AMRU_Ao_TGGCCAGAGGGCTTGA	AMRU	Ao	4784	PvP01_09_v1_685_-_PVP01_0905800_-1	0.364668
AMRU_Ao_TGGCCAGGTGCTTCTC	AMRU	Ao	7945	PvP01_09_v1_685_-_PVP01_0905800_-1	0.0480446
AMRU_Ao_TGGCCAGGTTAAGTAG	AMRU	Ao	4084	PvP01_09_v1_685_-_PVP01_0905800_-1	0
AMRU_Ao_TGGCGCAGTTTGCATG	AMRU	Ao	5025	PvP01_09_v1_685_-_PVP01_0905800_-1	0.53042
AMRU_Ao_TGGCGCATCTGTTGAG	AMRU	Ao	8219	PvP01_09_v1_685_-_PVP01_0905800_-1	0.21913
AMRU_Ao_TGGCTGGAGAACTGTA	AMRU	Ao	5906	PvP01_09_v1_685_-_PVP01_0905800_-1	0.621029
AMRU_Ao_TGGCTGGAGATAGGAG	AMRU	Ao	984	PvP01_09_v1_685_-_PVP01_0905800_-1	0
AMRU_Ao_TGGCTGGAGGATATAC	AMRU	Ao	318	PvP01_09_v1_685_-_PVP01_0905800_-1	0.168833
AMRU_Ao_TGGCTGGGTAAACACA	AMRU	Ao	3187	PvP01_09_v1_685_-_PVP01_0905800_-1	0.176991
AMRU_Ao_TGGCTGGTCCTATTCA	AMRU	Ao	3334	PvP01_09_v1_685_-_PVP01_0905800_-1	0
AMRU_Ao_TGGCTGGTCTACTCAT	AMRU	Ao	6631	PvP01_09_v1_685_-_PVP01_0905800_-1	0.335828
AMRU_Ao_TGGGAAGAGGCTATCT	AMRU	Ao	4272	PvP01_09_v1_685_-_PVP01_0905800_-1	0.144078
AMRU_Ao_TGGGAAGTCAGGTAAA	AMRU	Ao	5260	PvP01_09_v1_685_-_PVP01_0905800_-1	0.0980633
AMRU_Ao_TGGGAAGTCATAACCG	AMRU	Ao	3017	PvP01_09_v1_685_-_PVP01_0905800_-1	0.3174
AMRU_Ao_TGGGAAGTCATTATCC	AMRU	Ao	2205	PvP01_09_v1_685_-_PVP01_0905800_-1	0.100528
AMRU_Ao_TGGGAAGTCTGCTGCT	AMRU	Ao	8068	PvP01_09_v1_685_-_PVP01_0905800_-1	0.152042
AMRU_Ao_TGGGCGTCAGCTGTAT	AMRU	Ao	2167	PvP01_09_v1_685_-_PVP01_0905800_-1	0.122242
AMRU_Ao_TGGGCGTCATTCCTGC	AMRU	Ao	5238	PvP01_09_v1_685_-_PVP01_0905800_-1	0.780363
AMRU_Ao_TGGGCGTTCCGCATAA	AMRU	Ao	3961	PvP01_09_v1_685_-_PVP01_0905800_-1	0
AMRU_Ao_TGGTTAGAGGCTCTTA	AMRU	Ao	8938	PvP01_09_v1_685_-_PVP01_0905800_-1	0.0968078
AMRU_Ao_TGGTTAGAGTATCTCG	AMRU	Ao	5227	PvP01_09_v1_685_-_PVP01_0905800_-1	1.56654
AMRU_Ao_TGGTTAGAGTCAATAG	AMRU	Ao	4140	PvP01_09_v1_685_-_PVP01_0905800_-1	0
AMRU_Ao_TGGTTAGCAAGTACCT	AMRU	Ao	6317	PvP01_09_v1_685_-_PVP01_0905800_-1	0.485882
AMRU_Ao_TGGTTAGTCAGGTTCA	AMRU	Ao	2721	PvP01_09_v1_685_-_PVP01_0905800_-1	0
AMRU_Ao_TGGTTAGTCCGTCATC	AMRU	Ao	3068	PvP01_09_v1_685_-_PVP01_0905800_-1	0.404592
AMRU_Ao_TGGTTAGTCGGTGTTA	AMRU	Ao	96	PvP01_09_v1_685_-_PVP01_0905800_-1	0
AMRU_Ao_TGGTTCCCACATCTTT	AMRU	Ao	4297	PvP01_09_v1_685_-_PVP01_0905800_-1	0
AMRU_Ao_TGTATTCGTCAAAGAT	AMRU	Ao	1942	PvP01_09_v1_685_-_PVP01_0905800_-1	0.0660677
AMRU_Ao_TGTATTCGTCCGTGAC	AMRU	Ao	5801	PvP01_09_v1_685_-_PVP01_0905800_-1	1.31954
AMRU_Ao_TGTATTCGTTCAGACT	AMRU	Ao	8699	PvP01_09_v1_685_-_PVP01_0905800_-1	0.0428908
AMRU_Ao_TGTATTCTCCGTTGTC	AMRU	Ao	4086	PvP01_09_v1_685_-_PVP01_0905800_-1	0.209366
AMRU_Ao_TGTATTCTCCTGTACC	AMRU	Ao	4526	PvP01_09_v1_685_-_PVP01_0905800_-1	0.576502
AMRU_Ao_TGTCCCAAGACAAGCC	AMRU	Ao	3619	PvP01_09_v1_685_-_PVP01_0905800_-1	0.559945
AMRU_Ao_TGTCCCAAGGTGATTA	AMRU	Ao	7749	PvP01_09_v1_685_-_PVP01_0905800_-1	0.184894
AMRU_Ao_TGTCCCACAAGCCGTC	AMRU	Ao	3812	PvP01_09_v1_685_-_PVP01_0905800_-1	0.180305
AMRU_Ao_TGTCCCATCCGTCAAA	AMRU	Ao	3931	PvP01_09_v1_685_-_PVP01_0905800_-1	0.403388
AMRU_Ao_TGTGGTACATGCATGT	AMRU	Ao	4130	PvP01_09_v1_685_-_PVP01_0905800_-1	0.138026
AMRU_Ao_TGTGGTAGTCTAGAGG	AMRU	Ao	4404	PvP01_09_v1_685_-_PVP01_0905800_-1	0.720202
AMRU_Ao_TGTGTTTAGAGACTTA	AMRU	Ao	4557	PvP01_09_v1_685_-_PVP01_0905800_-1	0.400053
AMRU_Ao_TGTGTTTCAGTCACTA	AMRU	Ao	2534	PvP01_09_v1_685_-_PVP01_0905800_-1	0
AMRU_Ao_TGTGTTTCAGTCCTTC	AMRU	Ao	2514	PvP01_09_v1_685_-_PVP01_0905800_-1	0.234412
AMRU_Ao_TGTGTTTCAGTCGTGC	AMRU	Ao	5580	PvP01_09_v1_685_-_PVP01_0905800_-1	0.34344
AMRU_Ao_TGTGTTTCAGTTTACG	AMRU	Ao	3724	PvP01_09_v1_685_-_PVP01_0905800_-1	0.5003
AMRU_Ao_TGTGTTTGTGGCCCTA	AMRU	Ao	3180	PvP01_09_v1_685_-_PVP01_0905800_-1	0
AMRU_Ao_TGTGTTTGTGTTTGGT	AMRU	Ao	6177	PvP01_09_v1_685_-_PVP01_0905800_-1	0.548276
AMRU_Ao_TGTGTTTTCACTTACT	AMRU	Ao	7873	PvP01_09_v1_685_-_PVP01_0905800_-1	1.0649
AMRU_Ao_TGTGTTTTCAGATAAG	AMRU	Ao	7716	PvP01_09_v1_685_-_PVP01_0905800_-1	0.291503
AMRU_Ao_TGTGTTTTCATCGATG	AMRU	Ao	8892	PvP01_09_v1_685_-_PVP01_0905800_-1	0.0835608
AMRU_Ao_TGTTCCGCAGCGATCC	AMRU	Ao	5084	PvP01_09_v1_685_-_PVP01_0905800_-1	0.473968
AMRU_Ao_TGTTCCGTCATTATCC	AMRU	Ao	3907	PvP01_09_v1_685_-_PVP01_0905800_-1	0.318776
AMRU_Ao_TGTTCCGTCCGGGTGT	AMRU	Ao	8587	PvP01_09_v1_685_-_PVP01_0905800_-1	0.021542
AMRU_Ao_TGTTCCGTCTTAGCCC	AMRU	Ao	3392	PvP01_09_v1_685_-_PVP01_0905800_-1	0
AMRU_Ao_TTAACTCAGAGGGCTT	AMRU	Ao	4049	PvP01_09_v1_685_-_PVP01_0905800_-1	0.0473015
AMRU_Ao_TTAACTCAGTCCCACG	AMRU	Ao	4605	PvP01_09_v1_685_-_PVP01_0905800_-1	0.0487543
AMRU_Ao_TTAACTCCAGTGGAGT	AMRU	Ao	8780	PvP01_09_v1_685_-_PVP01_0905800_-1	0.0369331
AMRU_Ao_TTAACTCGTAGTGAAT	AMRU	Ao	4570	PvP01_09_v1_685_-_PVP01_0905800_-1	0.372887
AMRU_Ao_TTAACTCGTCGACTGC	AMRU	Ao	5807	PvP01_09_v1_685_-_PVP01_0905800_-1	1.36268
AMRU_Ao_TTAACTCTCCAAACAC	AMRU	Ao	1225	PvP01_09_v1_685_-_PVP01_0905800_-1	0
AMRU_Ao_TTAGGACAGGTGATTA	AMRU	Ao	5303	PvP01_09_v1_685_-_PVP01_0905800_-1	0.498405
AMRU_Ao_TTAGGACCAAACTGTC	AMRU	Ao	8917	PvP01_09_v1_685_-_PVP01_0905800_-1	0.0500776
AMRU_Ao_TTAGGACCAACACGCC	AMRU	Ao	4132	PvP01_09_v1_685_-_PVP01_0905800_-1	0.325972
AMRU_Ao_TTAGGACTCAACGCTA	AMRU	Ao	4690	PvP01_09_v1_685_-_PVP01_0905800_-1	0.273658
AMRU_Ao_TTAGGCAAGAAACGCC	AMRU	Ao	3976	PvP01_09_v1_685_-_PVP01_0905800_-1	0.294826
AMRU_Ao_TTAGGCAGTCCTGCTT	AMRU	Ao	2952	PvP01_09_v1_685_-_PVP01_0905800_-1	0.0587544
AMRU_Ao_TTAGTTCAGTGTCCAT	AMRU	Ao	2193	PvP01_09_v1_685_-_PVP01_0905800_-1	0.0637227
AMRU_Ao_TTAGTTCGTGGCGAAT	AMRU	Ao	1088	PvP01_09_v1_685_-_PVP01_0905800_-1	0
AMRU_Ao_TTAGTTCTCCGAACGC	AMRU	Ao	5079	PvP01_09_v1_685_-_PVP01_0905800_-1	0.536865
AMRU_Ao_TTATGCTAGTAGTGCG	AMRU	Ao	2176	PvP01_09_v1_685_-_PVP01_0905800_-1	0.0934536
AMRU_Ao_TTATGCTCATTCCTCG	AMRU	Ao	5240	PvP01_09_v1_685_-_PVP01_0905800_-1	1.20048
AMRU_Ao_TTCCCAGAGATGGGTC	AMRU	Ao	8734	PvP01_09_v1_685_-_PVP01_0905800_-1	0.0789308
AMRU_Ao_TTCCCAGAGCCGTCGT	AMRU	Ao	3778	PvP01_09_v1_685_-_PVP01_0905800_-1	0
AMRU_Ao_TTCCCAGAGGGATCTG	AMRU	Ao	5056	PvP01_09_v1_685_-_PVP01_0905800_-1	0.820176
AMRU_Ao_TTCCCAGGTCCGACGT	AMRU	Ao	2447	PvP01_09_v1_685_-_PVP01_0905800_-1	0.673344
AMRU_Ao_TTCGAAGCAAATACAG	AMRU	Ao	2886	PvP01_09_v1_685_-_PVP01_0905800_-1	0.267142
AMRU_Ao_TTCGAAGCACGGCGTT	AMRU	Ao	8563	PvP01_09_v1_685_-_PVP01_0905800_-1	0.0598767
AMRU_Ao_TTCGAAGGTGCTCTTC	AMRU	Ao	5645	PvP01_09_v1_685_-_PVP01_0905800_-1	0.925831
AMRU_Ao_TTCGAAGGTTACTGAC	AMRU	Ao	2780	PvP01_09_v1_685_-_PVP01_0905800_-1	0.0517598
AMRU_Ao_TTCGAAGTCGGTGTCG	AMRU	Ao	433	PvP01_09_v1_685_-_PVP01_0905800_-1	0
AMRU_Ao_TTCGGTCCACACATGT	AMRU	Ao	5251	PvP01_09_v1_685_-_PVP01_0905800_-1	1.35318
AMRU_Ao_TTCGGTCCACTGAAGG	AMRU	Ao	4859	PvP01_09_v1_685_-_PVP01_0905800_-1	0.177873
AMRU_Ao_TTCGGTCCATGACATC	AMRU	Ao	4508	PvP01_09_v1_685_-_PVP01_0905800_-1	1.23153
AMRU_Ao_TTCGGTCTCGTCTGAA	AMRU	Ao	4912	PvP01_09_v1_685_-_PVP01_0905800_-1	0.456704
AMRU_Ao_TTCGGTCTCTGTGCAA	AMRU	Ao	9072	PvP01_09_v1_685_-_PVP01_0905800_-1	0
AMRU_Ao_TTCTACAGTTCCCGAG	AMRU	Ao	2906	PvP01_09_v1_685_-_PVP01_0905800_-1	0.314743
AMRU_Ao_TTCTACATCACGATGT	AMRU	Ao	3114	PvP01_09_v1_685_-_PVP01_0905800_-1	0.0603865
AMRU_Ao_TTCTACATCGTTGACA	AMRU	Ao	6852	PvP01_09_v1_685_-_PVP01_0905800_-1	0.0666933
AMRU_Ao_TTCTACATCTCAAGTG	AMRU	Ao	7769	PvP01_09_v1_685_-_PVP01_0905800_-1	0
AMRU_Ao_TTCTACATCTCGAGTA	AMRU	Ao	6123	PvP01_09_v1_685_-_PVP01_0905800_-1	0.765078
AMRU_Ao_TTCTCAACAAGAGGCT	AMRU	Ao	3843	PvP01_09_v1_685_-_PVP01_0905800_-1	0.158384
AMRU_Ao_TTCTCAAGTGTGAATA	AMRU	Ao	6424	PvP01_09_v1_685_-_PVP01_0905800_-1	0.296209
AMRU_Ao_TTCTCAAGTTGCGCAC	AMRU	Ao	1740	PvP01_09_v1_685_-_PVP01_0905800_-1	0.153139
AMRU_Ao_TTCTCAATCCGTTGTC	AMRU	Ao	4790	PvP01_09_v1_685_-_PVP01_0905800_-1	0.933101
AMRU_Ao_TTCTCCTTCGATAGAA	AMRU	Ao	4046	PvP01_09_v1_685_-_PVP01_0905800_-1	0.109824
AMRU_Ao_TTCTCCTTCTCATTCA	AMRU	Ao	1828	PvP01_09_v1_685_-_PVP01_0905800_-1	0.168947
AMRU_Ao_TTCTCCTTCTTCAACT	AMRU	Ao	2967	PvP01_09_v1_685_-_PVP01_0905800_-1	0.237178
AMRU_Ao_TTCTTAGAGACAAAGG	AMRU	Ao	3650	PvP01_09_v1_685_-_PVP01_0905800_-1	0
AMRU_Ao_TTCTTAGAGCACCGCT	AMRU	Ao	4470	PvP01_09_v1_685_-_PVP01_0905800_-1	0.254431
AMRU_Ao_TTCTTAGAGGTGATAT	AMRU	Ao	5194	PvP01_09_v1_685_-_PVP01_0905800_-1	0.325385
AMRU_Ao_TTCTTAGCAGTCAGCC	AMRU	Ao	3919	PvP01_09_v1_685_-_PVP01_0905800_-1	0.362024
AMRU_Ao_TTCTTAGCATCCGTGG	AMRU	Ao	8863	PvP01_09_v1_685_-_PVP01_0905800_-1	0.163261
AMRU_Ao_TTCTTAGGTACGCACC	AMRU	Ao	4387	PvP01_09_v1_685_-_PVP01_0905800_-1	0.228606
AMRU_Ao_TTCTTAGTCAACACCA	AMRU	Ao	1432	PvP01_09_v1_685_-_PVP01_0905800_-1	0
AMRU_Ao_TTGAACGAGGATGCGT	AMRU	Ao	3282	PvP01_09_v1_685_-_PVP01_0905800_-1	0.348408
AMRU_Ao_TTGAACGGTGAGCGAT	AMRU	Ao	5434	PvP01_09_v1_685_-_PVP01_0905800_-1	0.907338
AMRU_Ao_TTGAACGGTTTCCACC	AMRU	Ao	2004	PvP01_09_v1_685_-_PVP01_0905800_-1	0.168095
AMRU_Ao_TTGAACGTCACGACTA	AMRU	Ao	5284	PvP01_09_v1_685_-_PVP01_0905800_-1	0
AMRU_Ao_TTGACTTCAAGCCATT	AMRU	Ao	3323	PvP01_09_v1_685_-_PVP01_0905800_-1	0.309534
AMRU_Ao_TTGACTTCATGAACCT	AMRU	Ao	7702	PvP01_09_v1_685_-_PVP01_0905800_-1	0
AMRU_Ao_TTGACTTGTCAGTGGA	AMRU	Ao	3509	PvP01_09_v1_685_-_PVP01_0905800_-1	0.206612
AMRU_Ao_TTGCCGTAGTATCGAA	AMRU	Ao	4488	PvP01_09_v1_685_-_PVP01_0905800_-1	0.163452
AMRU_Ao_TTGCCGTGTCAACATC	AMRU	Ao	1469	PvP01_09_v1_685_-_PVP01_0905800_-1	0.0818063
AMRU_Ao_TTGCCGTGTGAAAGAG	AMRU	Ao	88	PvP01_09_v1_685_-_PVP01_0905800_-1	0
AMRU_Ao_TTGCCGTTCTTATCTG	AMRU	Ao	5091	PvP01_09_v1_685_-_PVP01_0905800_-1	0.18703
AMRU_Ao_TTGCGTCTCCATGCTC	AMRU	Ao	5309	PvP01_09_v1_685_-_PVP01_0905800_-1	0.392607
AMRU_Ao_TTGGAACCACGTCAGC	AMRU	Ao	5360	PvP01_09_v1_685_-_PVP01_0905800_-1	0.192715
AMRU_Ao_TTGGCAAAGCCTTGAT	AMRU	Ao	3238	PvP01_09_v1_685_-_PVP01_0905800_-1	0.150482
AMRU_Ao_TTGGCAACAACACCTA	AMRU	Ao	1988	PvP01_09_v1_685_-_PVP01_0905800_-1	0
AMRU_Ao_TTGGCAAGTCTTGTCC	AMRU	Ao	1423	PvP01_09_v1_685_-_PVP01_0905800_-1	0
AMRU_Ao_TTGGCAATCAACACCA	AMRU	Ao	2289	PvP01_09_v1_685_-_PVP01_0905800_-1	0.234146
AMRU_Ao_TTGTAGGAGGGCTTCC	AMRU	Ao	4205	PvP01_09_v1_685_-_PVP01_0905800_-1	0.47824
AMRU_Ao_TTTACTGAGTCGAGTG	AMRU	Ao	3765	PvP01_09_v1_685_-_PVP01_0905800_-1	0.0631552
AMRU_Ao_TTTACTGCACAAGACG	AMRU	Ao	4989	PvP01_09_v1_685_-_PVP01_0905800_-1	0.62383
AMRU_Ao_TTTACTGCACAAGCCC	AMRU	Ao	5160	PvP01_09_v1_685_-_PVP01_0905800_-1	0.472227
AMRU_Ao_TTTACTGTCATGCTCC	AMRU	Ao	2934	PvP01_09_v1_685_-_PVP01_0905800_-1	0.173958
AMRU_Ao_TTTATGCAGCAATCTC	AMRU	Ao	8704	PvP01_09_v1_685_-_PVP01_0905800_-1	0.131288
AMRU_Ao_TTTCCTCGTCTGCCAG	AMRU	Ao	2547	PvP01_09_v1_685_-_PVP01_0905800_-1	0.261247
AMRU_Ao_TTTGCGCAGGAGCGAG	AMRU	Ao	4522	PvP01_09_v1_685_-_PVP01_0905800_-1	0.525762
AMRU_Ao_TTTGCGCAGGCGACAT	AMRU	Ao	3702	PvP01_09_v1_685_-_PVP01_0905800_-1	0.0915835
AMRU_Ao_TTTGCGCCACAACTGT	AMRU	Ao	3135	PvP01_09_v1_685_-_PVP01_0905800_-1	0.060698
AMRU_Ao_TTTGCGCGTAACGCGA	AMRU	Ao	1819	PvP01_09_v1_685_-_PVP01_0905800_-1	0
AMRU_Ao_TTTGCGCGTATCACCA	AMRU	Ao	6712	PvP01_09_v1_685_-_PVP01_0905800_-1	0
AMRU_Ao_TTTGCGCGTTCTGGTA	AMRU	Ao	5608	PvP01_09_v1_685_-_PVP01_0905800_-1	0.839429
AMRU_Ao_TTTGGTTAGTGGGCTA	AMRU	Ao	4979	PvP01_09_v1_685_-_PVP01_0905800_-1	0.526719
AMRU_Ao_TTTGTCAAGATGCCAG	AMRU	Ao	6851	PvP01_09_v1_685_-_PVP01_0905800_-1	0.146177
AMRU_Ao_TTTGTCACAGTATAAG	AMRU	Ao	4486	PvP01_09_v1_685_-_PVP01_0905800_-1	0.456934
AMRU_Ao_TTTGTCAGTCCCGACA	AMRU	Ao	3505	PvP01_09_v1_685_-_PVP01_0905800_-1	0.322234
AMRU_CQ_AAACCTGAGGGAACGG	AMRU	CQ	2594	PvP01_09_v1_685_-_PVP01_0905800_-1	0.0624649
AMRU_CQ_AAACCTGCATCGGGTC	AMRU	CQ	1653	PvP01_09_v1_685_-_PVP01_0905800_-1	0
AMRU_CQ_AAACCTGTCGTCCAGG	AMRU	CQ	3140	PvP01_09_v1_685_-_PVP01_0905800_-1	0.599431
AMRU_CQ_AAACGGGAGTGCAAGC	AMRU	CQ	2429	PvP01_09_v1_685_-_PVP01_0905800_-1	0.516693
AMRU_CQ_AAACGGGCATGGGACA	AMRU	CQ	1212	PvP01_09_v1_685_-_PVP01_0905800_-1	0.0707064
AMRU_CQ_AAACGGGGTGAAGGCT	AMRU	CQ	3736	PvP01_09_v1_685_-_PVP01_0905800_-1	0.572902
AMRU_CQ_AAACGGGTCGCATGGC	AMRU	CQ	2374	PvP01_09_v1_685_-_PVP01_0905800_-1	0
AMRU_CQ_AAACGGGTCGCCTGTT	AMRU	CQ	3473	PvP01_09_v1_685_-_PVP01_0905800_-1	2.44681
AMRU_CQ_AAAGATGAGAAGATTC	AMRU	CQ	2798	PvP01_09_v1_685_-_PVP01_0905800_-1	0.323389
AMRU_CQ_AAAGATGCACTGTTAG	AMRU	CQ	7810	PvP01_09_v1_685_-_PVP01_0905800_-1	0.0622278
AMRU_CQ_AAAGATGCAGACGCTC	AMRU	CQ	7310	PvP01_09_v1_685_-_PVP01_0905800_-1	0
AMRU_CQ_AAAGATGGTCCATCCT	AMRU	CQ	2428	PvP01_09_v1_685_-_PVP01_0905800_-1	0.445633
AMRU_CQ_AAAGATGGTGTATGGG	AMRU	CQ	2274	PvP01_09_v1_685_-_PVP01_0905800_-1	0.557276
AMRU_CQ_AAAGATGTCTGTTGAG	AMRU	CQ	1484	PvP01_09_v1_685_-_PVP01_0905800_-1	0.804074
AMRU_CQ_AAAGCAAAGATCGGGT	AMRU	CQ	2135	PvP01_09_v1_685_-_PVP01_0905800_-1	0.0842318
AMRU_CQ_AAAGCAAAGGCTAGCA	AMRU	CQ	2699	PvP01_09_v1_685_-_PVP01_0905800_-1	0.425144
AMRU_CQ_AAAGCAAAGTACACCT	AMRU	CQ	2957	PvP01_09_v1_685_-_PVP01_0905800_-1	0.235073
AMRU_CQ_AAAGCAAGTTGACGTT	AMRU	CQ	3635	PvP01_09_v1_685_-_PVP01_0905800_-1	0.87778
AMRU_CQ_AAAGTAGGTCTGCGGT	AMRU	CQ	2369	PvP01_09_v1_685_-_PVP01_0905800_-1	0.442439
AMRU_CQ_AAAGTAGTCGCGTAGC	AMRU	CQ	1685	PvP01_09_v1_685_-_PVP01_0905800_-1	0.325733
AMRU_CQ_AAAGTAGTCTCTGCTG	AMRU	CQ	2704	PvP01_09_v1_685_-_PVP01_0905800_-1	0.549602
AMRU_CQ_AAATGCCAGACTAAGT	AMRU	CQ	1913	PvP01_09_v1_685_-_PVP01_0905800_-1	1.15566
AMRU_CQ_AACACGTAGAACTGTA	AMRU	CQ	2525	PvP01_09_v1_685_-_PVP01_0905800_-1	0.139749
AMRU_CQ_AACACGTAGTGCAAGC	AMRU	CQ	3604	PvP01_09_v1_685_-_PVP01_0905800_-1	0.550444
AMRU_CQ_AACACGTCAAGCTGTT	AMRU	CQ	2115	PvP01_09_v1_685_-_PVP01_0905800_-1	0.207211
AMRU_CQ_AACACGTCATGGTTGT	AMRU	CQ	3189	PvP01_09_v1_685_-_PVP01_0905800_-1	0.830996
AMRU_CQ_AACACGTGTCTCAACA	AMRU	CQ	1703	PvP01_09_v1_685_-_PVP01_0905800_-1	0.216462
AMRU_CQ_AACCATGAGTTGCAGG	AMRU	CQ	2217	PvP01_09_v1_685_-_PVP01_0905800_-1	0.109081
AMRU_CQ_AACCATGCAATCAGAA	AMRU	CQ	8231	PvP01_09_v1_685_-_PVP01_0905800_-1	0.164339
AMRU_CQ_AACCATGCACCTATCC	AMRU	CQ	3000	PvP01_09_v1_685_-_PVP01_0905800_-1	0.573559
AMRU_CQ_AACCATGCAGGCTGAA	AMRU	CQ	2776	PvP01_09_v1_685_-_PVP01_0905800_-1	0.459841
AMRU_CQ_AACCATGGTAGAGGAA	AMRU	CQ	1055	PvP01_09_v1_685_-_PVP01_0905800_-1	0
AMRU_CQ_AACCATGGTCGAATCT	AMRU	CQ	1783	PvP01_09_v1_685_-_PVP01_0905800_-1	0
AMRU_CQ_AACCGCGTCAACCATG	AMRU	CQ	1782	PvP01_09_v1_685_-_PVP01_0905800_-1	0.291886
AMRU_CQ_AACGTTGAGACCTTTG	AMRU	CQ	872	PvP01_09_v1_685_-_PVP01_0905800_-1	0.182665
AMRU_CQ_AACGTTGAGTGTCTCA	AMRU	CQ	7384	PvP01_09_v1_685_-_PVP01_0905800_-1	0.0567247
AMRU_CQ_AACGTTGGTTCCATGA	AMRU	CQ	3348	PvP01_09_v1_685_-_PVP01_0905800_-1	0.477327
AMRU_CQ_AACTCAGAGGTTCCTA	AMRU	CQ	3938	PvP01_09_v1_685_-_PVP01_0905800_-1	0.438943
AMRU_CQ_AACTCAGAGTGTCCCG	AMRU	CQ	9079	PvP01_09_v1_685_-_PVP01_0905800_-1	0.109975
AMRU_CQ_AACTCAGCATGCAATC	AMRU	CQ	4342	PvP01_09_v1_685_-_PVP01_0905800_-1	0.731886
AMRU_CQ_AACTCAGGTCGGCTCA	AMRU	CQ	3897	PvP01_09_v1_685_-_PVP01_0905800_-1	0
AMRU_CQ_AACTCAGTCACCGGGT	AMRU	CQ	6934	PvP01_09_v1_685_-_PVP01_0905800_-1	0.370679
AMRU_CQ_AACTCAGTCCTACAGA	AMRU	CQ	3224	PvP01_09_v1_685_-_PVP01_0905800_-1	0.490597
AMRU_CQ_AACTCCCAGATGTCGG	AMRU	CQ	1902	PvP01_09_v1_685_-_PVP01_0905800_-1	0.690369
AMRU_CQ_AACTCCCAGGGCTTCC	AMRU	CQ	2955	PvP01_09_v1_685_-_PVP01_0905800_-1	1.27077
AMRU_CQ_AACTCCCCATACCATG	AMRU	CQ	2468	PvP01_09_v1_685_-_PVP01_0905800_-1	0.335876
AMRU_CQ_AACTCCCGTAAGTTCC	AMRU	CQ	1927	PvP01_09_v1_685_-_PVP01_0905800_-1	0.501337
AMRU_CQ_AACTCCCGTGTCAATC	AMRU	CQ	2873	PvP01_09_v1_685_-_PVP01_0905800_-1	0.864922
AMRU_CQ_AACTCTTAGCAGACTG	AMRU	CQ	3874	PvP01_09_v1_685_-_PVP01_0905800_-1	0.968758
AMRU_CQ_AACTCTTAGCTTCGCG	AMRU	CQ	3081	PvP01_09_v1_685_-_PVP01_0905800_-1	0.15758
AMRU_CQ_AACTCTTCACCGTTGG	AMRU	CQ	2334	PvP01_09_v1_685_-_PVP01_0905800_-1	0.264145
AMRU_CQ_AACTCTTCATCGGAAG	AMRU	CQ	2774	PvP01_09_v1_685_-_PVP01_0905800_-1	0
AMRU_CQ_AACTCTTTCAGCTGGC	AMRU	CQ	2344	PvP01_09_v1_685_-_PVP01_0905800_-1	0.808059
AMRU_CQ_AACTCTTTCCAGAAGG	AMRU	CQ	4052	PvP01_09_v1_685_-_PVP01_0905800_-1	0.813008
AMRU_CQ_AACTCTTTCCGAGCCA	AMRU	CQ	1738	PvP01_09_v1_685_-_PVP01_0905800_-1	0.0545494
AMRU_CQ_AACTGGTAGCCTTGAT	AMRU	CQ	2331	PvP01_09_v1_685_-_PVP01_0905800_-1	0.229634
AMRU_CQ_AACTGGTAGCGTAATA	AMRU	CQ	4285	PvP01_09_v1_685_-_PVP01_0905800_-1	0.547895
AMRU_CQ_AACTGGTAGGAGCGAG	AMRU	CQ	3229	PvP01_09_v1_685_-_PVP01_0905800_-1	0
AMRU_CQ_AACTGGTCACCTGGTG	AMRU	CQ	7662	PvP01_09_v1_685_-_PVP01_0905800_-1	1.29342
AMRU_CQ_AACTGGTCATCTCCCA	AMRU	CQ	1990	PvP01_09_v1_685_-_PVP01_0905800_-1	0.481253
AMRU_CQ_AACTGGTGTAAACACA	AMRU	CQ	2591	PvP01_09_v1_685_-_PVP01_0905800_-1	0.410223
AMRU_CQ_AACTTTCAGACCTTTG	AMRU	CQ	3514	PvP01_09_v1_685_-_PVP01_0905800_-1	1.28143
AMRU_CQ_AACTTTCCATCGACGC	AMRU	CQ	1627	PvP01_09_v1_685_-_PVP01_0905800_-1	0.100271
AMRU_CQ_AACTTTCGTTCAGACT	AMRU	CQ	1973	PvP01_09_v1_685_-_PVP01_0905800_-1	0
AMRU_CQ_AACTTTCTCTAACCGA	AMRU	CQ	2655	PvP01_09_v1_685_-_PVP01_0905800_-1	0.694927
AMRU_CQ_AAGACCTAGAGCCTAG	AMRU	CQ	1612	PvP01_09_v1_685_-_PVP01_0905800_-1	0.125055
AMRU_CQ_AAGACCTCAACTGGCC	AMRU	CQ	4111	PvP01_09_v1_685_-_PVP01_0905800_-1	0.419933
AMRU_CQ_AAGACCTGTCTAGGTT	AMRU	CQ	3716	PvP01_09_v1_685_-_PVP01_0905800_-1	0.24566
AMRU_CQ_AAGCCGCAGACCACGA	AMRU	CQ	237	PvP01_09_v1_685_-_PVP01_0905800_-1	0
AMRU_CQ_AAGCCGCAGAGTACAT	AMRU	CQ	2218	PvP01_09_v1_685_-_PVP01_0905800_-1	0.0553495
AMRU_CQ_AAGCCGCAGCTCCTTC	AMRU	CQ	2684	PvP01_09_v1_685_-_PVP01_0905800_-1	0.287233
AMRU_CQ_AAGCCGCGTAGCTGCC	AMRU	CQ	1962	PvP01_09_v1_685_-_PVP01_0905800_-1	0.364804
AMRU_CQ_AAGCCGCTCCCTGACT	AMRU	CQ	1466	PvP01_09_v1_685_-_PVP01_0905800_-1	0.672533
AMRU_CQ_AAGGAGCAGCGGATCA	AMRU	CQ	3678	PvP01_09_v1_685_-_PVP01_0905800_-1	0.506868
AMRU_CQ_AAGGAGCAGTGGGTTG	AMRU	CQ	4563	PvP01_09_v1_685_-_PVP01_0905800_-1	0.527079
AMRU_CQ_AAGGAGCCAGACAAGC	AMRU	CQ	2805	PvP01_09_v1_685_-_PVP01_0905800_-1	0.334416
AMRU_CQ_AAGGAGCCATACGCCG	AMRU	CQ	1412	PvP01_09_v1_685_-_PVP01_0905800_-1	0.309351
AMRU_CQ_AAGGAGCTCAGGCGAA	AMRU	CQ	1090	PvP01_09_v1_685_-_PVP01_0905800_-1	0.140371
AMRU_CQ_AAGGCAGAGGAATTAC	AMRU	CQ	3076	PvP01_09_v1_685_-_PVP01_0905800_-1	0.424468
AMRU_CQ_AAGGCAGCAGTCGTGC	AMRU	CQ	2502	PvP01_09_v1_685_-_PVP01_0905800_-1	0.207577
AMRU_CQ_AAGGCAGGTACAGCAG	AMRU	CQ	3696	PvP01_09_v1_685_-_PVP01_0905800_-1	0.751759
AMRU_CQ_AAGGCAGTCAAGGCTT	AMRU	CQ	8304	PvP01_09_v1_685_-_PVP01_0905800_-1	0
AMRU_CQ_AAGGTTCCACGGATAG	AMRU	CQ	1074	PvP01_09_v1_685_-_PVP01_0905800_-1	0
AMRU_CQ_AAGGTTCTCAGCTCGG	AMRU	CQ	3997	PvP01_09_v1_685_-_PVP01_0905800_-1	0.186463
AMRU_CQ_AAGGTTCTCAGGCCCA	AMRU	CQ	2667	PvP01_09_v1_685_-_PVP01_0905800_-1	0.382765
AMRU_CQ_AAGTCTGAGTACACCT	AMRU	CQ	8350	PvP01_09_v1_685_-_PVP01_0905800_-1	0.181703
AMRU_CQ_AAGTCTGGTTCTGGTA	AMRU	CQ	4726	PvP01_09_v1_685_-_PVP01_0905800_-1	0.711744
AMRU_CQ_AATCCAGCACACATGT	AMRU	CQ	4101	PvP01_09_v1_685_-_PVP01_0905800_-1	0.560224
AMRU_CQ_AATCCAGCACGACTCG	AMRU	CQ	3727	PvP01_09_v1_685_-_PVP01_0905800_-1	0.787014
AMRU_CQ_AATCCAGGTAAGTGGC	AMRU	CQ	2678	PvP01_09_v1_685_-_PVP01_0905800_-1	0.243161
AMRU_CQ_AATCCAGGTATCGCAT	AMRU	CQ	2711	PvP01_09_v1_685_-_PVP01_0905800_-1	0.45683
AMRU_CQ_AATCCAGTCGCTAGCG	AMRU	CQ	1760	PvP01_09_v1_685_-_PVP01_0905800_-1	0.545375
AMRU_CQ_AATCGGTAGCTAAACA	AMRU	CQ	3429	PvP01_09_v1_685_-_PVP01_0905800_-1	0.242994
AMRU_CQ_AATCGGTCATATACCG	AMRU	CQ	1837	PvP01_09_v1_685_-_PVP01_0905800_-1	0
AMRU_CQ_AATCGGTGTTCCGTCT	AMRU	CQ	3161	PvP01_09_v1_685_-_PVP01_0905800_-1	0.19998
AMRU_CQ_ACACCAAAGCTCTCGG	AMRU	CQ	3020	PvP01_09_v1_685_-_PVP01_0905800_-1	0.249076
AMRU_CQ_ACACCAATCTCAACTT	AMRU	CQ	1859	PvP01_09_v1_685_-_PVP01_0905800_-1	0.239292
AMRU_CQ_ACACCCTAGGAGCGAG	AMRU	CQ	1950	PvP01_09_v1_685_-_PVP01_0905800_-1	0.185977
AMRU_CQ_ACACCCTAGTTACCCA	AMRU	CQ	2518	PvP01_09_v1_685_-_PVP01_0905800_-1	0.339443
AMRU_CQ_ACACCCTCAGCTGTAT	AMRU	CQ	4608	PvP01_09_v1_685_-_PVP01_0905800_-1	2.49626
AMRU_CQ_ACACCCTTCATGTCTT	AMRU	CQ	6044	PvP01_09_v1_685_-_PVP01_0905800_-1	4.14914
AMRU_CQ_ACACCGGCATGGTCAT	AMRU	CQ	3658	PvP01_09_v1_685_-_PVP01_0905800_-1	0.340329
AMRU_CQ_ACACCGGGTATAATGG	AMRU	CQ	2676	PvP01_09_v1_685_-_PVP01_0905800_-1	0.149963
AMRU_CQ_ACACCGGGTCTAGTCA	AMRU	CQ	2669	PvP01_09_v1_685_-_PVP01_0905800_-1	1.29247
AMRU_CQ_ACACCGGGTCTAGTGT	AMRU	CQ	2349	PvP01_09_v1_685_-_PVP01_0905800_-1	0.101322
AMRU_CQ_ACACCGGGTGGTACAG	AMRU	CQ	2409	PvP01_09_v1_685_-_PVP01_0905800_-1	0.261192
AMRU_CQ_ACACCGGGTTATTCTC	AMRU	CQ	1914	PvP01_09_v1_685_-_PVP01_0905800_-1	0.540443
AMRU_CQ_ACACCGGTCTGCGTAA	AMRU	CQ	2299	PvP01_09_v1_685_-_PVP01_0905800_-1	0.885347
AMRU_CQ_ACACTGAGTAGCGCAA	AMRU	CQ	4349	PvP01_09_v1_685_-_PVP01_0905800_-1	0.196812
AMRU_CQ_ACAGCCGCAAGACACG	AMRU	CQ	1771	PvP01_09_v1_685_-_PVP01_0905800_-1	0.164267
AMRU_CQ_ACAGCCGCAGTAAGAT	AMRU	CQ	4038	PvP01_09_v1_685_-_PVP01_0905800_-1	1.16048
AMRU_CQ_ACAGCCGCATATGAGA	AMRU	CQ	2474	PvP01_09_v1_685_-_PVP01_0905800_-1	0
AMRU_CQ_ACAGCCGGTCTAACGT	AMRU	CQ	8071	PvP01_09_v1_685_-_PVP01_0905800_-1	0
AMRU_CQ_ACAGCCGTCTGTTTGT	AMRU	CQ	4190	PvP01_09_v1_685_-_PVP01_0905800_-1	0.610701
AMRU_CQ_ACAGCTAAGACTAGGC	AMRU	CQ	1886	PvP01_09_v1_685_-_PVP01_0905800_-1	0.55699
AMRU_CQ_ACAGCTACAAAGGCGT	AMRU	CQ	2114	PvP01_09_v1_685_-_PVP01_0905800_-1	0.148075
AMRU_CQ_ACATACGAGCCGATTT	AMRU	CQ	1894	PvP01_09_v1_685_-_PVP01_0905800_-1	0.331411
AMRU_CQ_ACATACGAGCGTAATA	AMRU	CQ	2159	PvP01_09_v1_685_-_PVP01_0905800_-1	0.737765
AMRU_CQ_ACATACGCATCTATGG	AMRU	CQ	3457	PvP01_09_v1_685_-_PVP01_0905800_-1	0.353904
AMRU_CQ_ACATACGGTCACAAGG	AMRU	CQ	1137	PvP01_09_v1_685_-_PVP01_0905800_-1	0.465962
AMRU_CQ_ACATACGGTTTGCATG	AMRU	CQ	2145	PvP01_09_v1_685_-_PVP01_0905800_-1	0
AMRU_CQ_ACATCAGAGATCGATA	AMRU	CQ	3779	PvP01_09_v1_685_-_PVP01_0905800_-1	0.335844
AMRU_CQ_ACATCAGGTTAAGTAG	AMRU	CQ	2315	PvP01_09_v1_685_-_PVP01_0905800_-1	0.08088
AMRU_CQ_ACATGGTAGAACTGTA	AMRU	CQ	1481	PvP01_09_v1_685_-_PVP01_0905800_-1	0.0955749
AMRU_CQ_ACATGGTAGACTGGGT	AMRU	CQ	3246	PvP01_09_v1_685_-_PVP01_0905800_-1	0.471054
AMRU_CQ_ACATGGTAGATAGCAT	AMRU	CQ	924	PvP01_09_v1_685_-_PVP01_0905800_-1	0.434292
AMRU_CQ_ACATGGTAGTCAATAG	AMRU	CQ	1597	PvP01_09_v1_685_-_PVP01_0905800_-1	0
AMRU_CQ_ACATGGTCAAGCCCAC	AMRU	CQ	2686	PvP01_09_v1_685_-_PVP01_0905800_-1	0.620117
AMRU_CQ_ACATGGTCACCAGGTC	AMRU	CQ	2261	PvP01_09_v1_685_-_PVP01_0905800_-1	0.161996
AMRU_CQ_ACATGGTGTCTTCAAG	AMRU	CQ	2181	PvP01_09_v1_685_-_PVP01_0905800_-1	0.349977
AMRU_CQ_ACATGGTGTGCAGACA	AMRU	CQ	256	PvP01_09_v1_685_-_PVP01_0905800_-1	0.539423
AMRU_CQ_ACCAGTAAGATCGATA	AMRU	CQ	4018	PvP01_09_v1_685_-_PVP01_0905800_-1	0.399078
AMRU_CQ_ACCAGTAAGCCTCGTG	AMRU	CQ	1408	PvP01_09_v1_685_-_PVP01_0905800_-1	0
AMRU_CQ_ACCAGTAGTAGCGTAG	AMRU	CQ	2971	PvP01_09_v1_685_-_PVP01_0905800_-1	0.180527
AMRU_CQ_ACCAGTATCCTTTACA	AMRU	CQ	1736	PvP01_09_v1_685_-_PVP01_0905800_-1	0
AMRU_CQ_ACCAGTATCTCGCTTG	AMRU	CQ	2462	PvP01_09_v1_685_-_PVP01_0905800_-1	0.752729
AMRU_CQ_ACCCACTAGACTAGGC	AMRU	CQ	1707	PvP01_09_v1_685_-_PVP01_0905800_-1	0.345781
AMRU_CQ_ACCCACTGTACCATCA	AMRU	CQ	1163	PvP01_09_v1_685_-_PVP01_0905800_-1	0
AMRU_CQ_ACCGTAATCCGAACGC	AMRU	CQ	1908	PvP01_09_v1_685_-_PVP01_0905800_-1	0.31321
AMRU_CQ_ACCTTTACAGGTGGAT	AMRU	CQ	3010	PvP01_09_v1_685_-_PVP01_0905800_-1	0
AMRU_CQ_ACCTTTAGTCAGAATA	AMRU	CQ	2137	PvP01_09_v1_685_-_PVP01_0905800_-1	0.102859
AMRU_CQ_ACCTTTAGTGTTTGTG	AMRU	CQ	4431	PvP01_09_v1_685_-_PVP01_0905800_-1	0.716589
AMRU_CQ_ACGAGCCAGGTGATAT	AMRU	CQ	1733	PvP01_09_v1_685_-_PVP01_0905800_-1	0.455823
AMRU_CQ_ACGAGCCCACTTCTGC	AMRU	CQ	3625	PvP01_09_v1_685_-_PVP01_0905800_-1	0.452723
AMRU_CQ_ACGAGCCGTTTGTGTG	AMRU	CQ	1279	PvP01_09_v1_685_-_PVP01_0905800_-1	0.304994
AMRU_CQ_ACGAGGACATGTCGAT	AMRU	CQ	2604	PvP01_09_v1_685_-_PVP01_0905800_-1	0.0588651
AMRU_CQ_ACGAGGAGTCAGAAGC	AMRU	CQ	1829	PvP01_09_v1_685_-_PVP01_0905800_-1	0.140538
AMRU_CQ_ACGAGGATCACCCGAG	AMRU	CQ	2372	PvP01_09_v1_685_-_PVP01_0905800_-1	0.119947
AMRU_CQ_ACGAGGATCAGTGCAT	AMRU	CQ	1961	PvP01_09_v1_685_-_PVP01_0905800_-1	0.324823
AMRU_CQ_ACGATACTCTCTAGGA	AMRU	CQ	1673	PvP01_09_v1_685_-_PVP01_0905800_-1	0
AMRU_CQ_ACGATGTCATCACCCT	AMRU	CQ	4361	PvP01_09_v1_685_-_PVP01_0905800_-1	0.490629
AMRU_CQ_ACGATGTTCAACTCTT	AMRU	CQ	1663	PvP01_09_v1_685_-_PVP01_0905800_-1	0.182598
AMRU_CQ_ACGATGTTCAGTGTTG	AMRU	CQ	2189	PvP01_09_v1_685_-_PVP01_0905800_-1	0.285796
AMRU_CQ_ACGCAGCCAAGAGTCG	AMRU	CQ	1549	PvP01_09_v1_685_-_PVP01_0905800_-1	0.127959
AMRU_CQ_ACGCAGCCATTACGAC	AMRU	CQ	3730	PvP01_09_v1_685_-_PVP01_0905800_-1	0.245459
AMRU_CQ_ACGCAGCGTTCCTCCA	AMRU	CQ	3079	PvP01_09_v1_685_-_PVP01_0905800_-1	0.849428
AMRU_CQ_ACGCCAGCACTGCCAG	AMRU	CQ	2368	PvP01_09_v1_685_-_PVP01_0905800_-1	0.0939673
AMRU_CQ_ACGCCAGGTAACGCGA	AMRU	CQ	6286	PvP01_09_v1_685_-_PVP01_0905800_-1	5.20291
AMRU_CQ_ACGCCGACAAGACACG	AMRU	CQ	1278	PvP01_09_v1_685_-_PVP01_0905800_-1	0.15213
AMRU_CQ_ACGCCGACAATAGAGT	AMRU	CQ	1763	PvP01_09_v1_685_-_PVP01_0905800_-1	0.432938
AMRU_CQ_ACGCCGACACCAGGCT	AMRU	CQ	1602	PvP01_09_v1_685_-_PVP01_0905800_-1	0.194751
AMRU_CQ_ACGCCGATCTGAGTGT	AMRU	CQ	8029	PvP01_09_v1_685_-_PVP01_0905800_-1	0.32538
AMRU_CQ_ACGGAGAGTCAATACC	AMRU	CQ	2874	PvP01_09_v1_685_-_PVP01_0905800_-1	0.231932
AMRU_CQ_ACGGAGAGTCGAACAG	AMRU	CQ	1923	PvP01_09_v1_685_-_PVP01_0905800_-1	0
AMRU_CQ_ACGGAGATCGTGGACC	AMRU	CQ	1227	PvP01_09_v1_685_-_PVP01_0905800_-1	0.180777
AMRU_CQ_ACGGCCAAGCTATGCT	AMRU	CQ	3169	PvP01_09_v1_685_-_PVP01_0905800_-1	0.863869
AMRU_CQ_ACGGGCTGTCCGTCAG	AMRU	CQ	2848	PvP01_09_v1_685_-_PVP01_0905800_-1	0
AMRU_CQ_ACGGGCTGTCGAACAG	AMRU	CQ	3144	PvP01_09_v1_685_-_PVP01_0905800_-1	0.049687
AMRU_CQ_ACGGGTCAGGCTCTTA	AMRU	CQ	2926	PvP01_09_v1_685_-_PVP01_0905800_-1	0.537779
AMRU_CQ_ACGGGTCAGGGCACTA	AMRU	CQ	1422	PvP01_09_v1_685_-_PVP01_0905800_-1	0
AMRU_CQ_ACGGGTCCAGTTTACG	AMRU	CQ	3624	PvP01_09_v1_685_-_PVP01_0905800_-1	0.354778
AMRU_CQ_ACGGGTCTCAAAGACA	AMRU	CQ	5001	PvP01_09_v1_685_-_PVP01_0905800_-1	3.55191
AMRU_CQ_ACGTCAAAGAGAACAG	AMRU	CQ	3375	PvP01_09_v1_685_-_PVP01_0905800_-1	0.0673718
AMRU_CQ_ACGTCAATCATGTGGT	AMRU	CQ	4200	PvP01_09_v1_685_-_PVP01_0905800_-1	0.0621157
AMRU_CQ_ACGTCAATCCGAATGT	AMRU	CQ	2348	PvP01_09_v1_685_-_PVP01_0905800_-1	0.648719
AMRU_CQ_ACGTCAATCTGTCAAG	AMRU	CQ	3854	PvP01_09_v1_685_-_PVP01_0905800_-1	1.00816
AMRU_CQ_ACTATCTAGAGCTGGT	AMRU	CQ	3437	PvP01_09_v1_685_-_PVP01_0905800_-1	0.400107
AMRU_CQ_ACTATCTAGTACGTAA	AMRU	CQ	2124	PvP01_09_v1_685_-_PVP01_0905800_-1	0.537924
AMRU_CQ_ACTATCTAGTGCGTGA	AMRU	CQ	5036	PvP01_09_v1_685_-_PVP01_0905800_-1	1.54874
AMRU_CQ_ACTATCTTCCAGAAGG	AMRU	CQ	2351	PvP01_09_v1_685_-_PVP01_0905800_-1	0.0925754
AMRU_CQ_ACTATCTTCCTGCTTG	AMRU	CQ	2876	PvP01_09_v1_685_-_PVP01_0905800_-1	0.658959
AMRU_CQ_ACTATCTTCTTTAGGG	AMRU	CQ	4129	PvP01_09_v1_685_-_PVP01_0905800_-1	0.95344
AMRU_CQ_ACTGAACAGCTCTCGG	AMRU	CQ	1712	PvP01_09_v1_685_-_PVP01_0905800_-1	0.718047
AMRU_CQ_ACTGAACAGGCAGGTT	AMRU	CQ	3683	PvP01_09_v1_685_-_PVP01_0905800_-1	0.417079
AMRU_CQ_ACTGAACTCGTACGGC	AMRU	CQ	3545	PvP01_09_v1_685_-_PVP01_0905800_-1	0.371816
AMRU_CQ_ACTGAGTAGACCACGA	AMRU	CQ	922	PvP01_09_v1_685_-_PVP01_0905800_-1	0.384074
AMRU_CQ_ACTGAGTAGCTTATCG	AMRU	CQ	1592	PvP01_09_v1_685_-_PVP01_0905800_-1	0.212029
AMRU_CQ_ACTGAGTCAGCCTGTG	AMRU	CQ	1525	PvP01_09_v1_685_-_PVP01_0905800_-1	0
AMRU_CQ_ACTGAGTTCAAGCCTA	AMRU	CQ	1906	PvP01_09_v1_685_-_PVP01_0905800_-1	0.402924
AMRU_CQ_ACTGATGCAGGATCGA	AMRU	CQ	2422	PvP01_09_v1_685_-_PVP01_0905800_-1	0.146149
AMRU_CQ_ACTGATGGTTGTGGCC	AMRU	CQ	2516	PvP01_09_v1_685_-_PVP01_0905800_-1	0
AMRU_CQ_ACTGATGTCATAACCG	AMRU	CQ	2089	PvP01_09_v1_685_-_PVP01_0905800_-1	0.119389
AMRU_CQ_ACTGCTCGTAAGAGAG	AMRU	CQ	1964	PvP01_09_v1_685_-_PVP01_0905800_-1	0.348675
AMRU_CQ_ACTGCTCGTTGTGGCC	AMRU	CQ	2268	PvP01_09_v1_685_-_PVP01_0905800_-1	0.16243
AMRU_CQ_ACTGCTCTCCAAACAC	AMRU	CQ	4417	PvP01_09_v1_685_-_PVP01_0905800_-1	0.775344
AMRU_CQ_ACTGTCCAGTCTTGCA	AMRU	CQ	1153	PvP01_09_v1_685_-_PVP01_0905800_-1	0.462214
AMRU_CQ_ACTGTCCAGTGAAGAG	AMRU	CQ	8544	PvP01_09_v1_685_-_PVP01_0905800_-1	0.0752748
AMRU_CQ_ACTGTCCCATTATCTC	AMRU	CQ	3307	PvP01_09_v1_685_-_PVP01_0905800_-1	0.363844
AMRU_CQ_ACTGTCCGTTATTCTC	AMRU	CQ	1216	PvP01_09_v1_685_-_PVP01_0905800_-1	0.201025
AMRU_CQ_ACTGTCCGTTCGTCTC	AMRU	CQ	2936	PvP01_09_v1_685_-_PVP01_0905800_-1	0.744085
AMRU_CQ_ACTTACTAGTGTTTGC	AMRU	CQ	1475	PvP01_09_v1_685_-_PVP01_0905800_-1	0.081493
AMRU_CQ_ACTTACTCAGTGGGAT	AMRU	CQ	1920	PvP01_09_v1_685_-_PVP01_0905800_-1	0.143792
AMRU_CQ_ACTTACTGTTCCTCCA	AMRU	CQ	1151	PvP01_09_v1_685_-_PVP01_0905800_-1	0.413018
AMRU_CQ_ACTTGTTCAGGGTTAG	AMRU	CQ	4029	PvP01_09_v1_685_-_PVP01_0905800_-1	0.73416
AMRU_CQ_ACTTGTTGTAGAGGAA	AMRU	CQ	2173	PvP01_09_v1_685_-_PVP01_0905800_-1	0.220604
AMRU_CQ_ACTTGTTTCCGTACAA	AMRU	CQ	2032	PvP01_09_v1_685_-_PVP01_0905800_-1	0.702023
AMRU_CQ_ACTTGTTTCGCACTCT	AMRU	CQ	2479	PvP01_09_v1_685_-_PVP01_0905800_-1	0.527183
AMRU_CQ_ACTTTCAAGAAACCTA	AMRU	CQ	2227	PvP01_09_v1_685_-_PVP01_0905800_-1	0.460246
AMRU_CQ_ACTTTCAGTGCGGTAA	AMRU	CQ	2269	PvP01_09_v1_685_-_PVP01_0905800_-1	0.106
AMRU_CQ_ACTTTCATCCGGGTGT	AMRU	CQ	2864	PvP01_09_v1_685_-_PVP01_0905800_-1	0.858369
AMRU_CQ_AGAATAGAGACAGACC	AMRU	CQ	2753	PvP01_09_v1_685_-_PVP01_0905800_-1	0.158353
AMRU_CQ_AGAATAGAGTCCATAC	AMRU	CQ	3101	PvP01_09_v1_685_-_PVP01_0905800_-1	0.140072
AMRU_CQ_AGAATAGCAGGTCTCG	AMRU	CQ	1729	PvP01_09_v1_685_-_PVP01_0905800_-1	0
AMRU_CQ_AGAATAGCATGGGAAC	AMRU	CQ	1011	PvP01_09_v1_685_-_PVP01_0905800_-1	0
AMRU_CQ_AGAATAGCATGGTTGT	AMRU	CQ	1201	PvP01_09_v1_685_-_PVP01_0905800_-1	0.110169
AMRU_CQ_AGAATAGGTAAACACA	AMRU	CQ	3621	PvP01_09_v1_685_-_PVP01_0905800_-1	1.20669
AMRU_CQ_AGAATAGTCCCTCAGT	AMRU	CQ	1430	PvP01_09_v1_685_-_PVP01_0905800_-1	0.340646
AMRU_CQ_AGAATAGTCGATAGAA	AMRU	CQ	4483	PvP01_09_v1_685_-_PVP01_0905800_-1	0.325283
AMRU_CQ_AGACGTTAGATCGATA	AMRU	CQ	1826	PvP01_09_v1_685_-_PVP01_0905800_-1	0.335402
AMRU_CQ_AGACGTTGTAAACACA	AMRU	CQ	1390	PvP01_09_v1_685_-_PVP01_0905800_-1	0.0660197
AMRU_CQ_AGACGTTGTAGTACCT	AMRU	CQ	1701	PvP01_09_v1_685_-_PVP01_0905800_-1	0
AMRU_CQ_AGAGCGAAGGACTGGT	AMRU	CQ	1558	PvP01_09_v1_685_-_PVP01_0905800_-1	0.144833
AMRU_CQ_AGAGCGACAATGGACG	AMRU	CQ	2420	PvP01_09_v1_685_-_PVP01_0905800_-1	0.295072
AMRU_CQ_AGAGCGACACGTTGGC	AMRU	CQ	4933	PvP01_09_v1_685_-_PVP01_0905800_-1	1.9807
AMRU_CQ_AGAGCGACAGCTTAAC	AMRU	CQ	1499	PvP01_09_v1_685_-_PVP01_0905800_-1	0.0478629
AMRU_CQ_AGAGCGATCAACTCTT	AMRU	CQ	3354	PvP01_09_v1_685_-_PVP01_0905800_-1	0.916849
AMRU_CQ_AGAGCGATCCTAGAAC	AMRU	CQ	1796	PvP01_09_v1_685_-_PVP01_0905800_-1	0.259353
AMRU_CQ_AGAGCTTCACGAAATA	AMRU	CQ	2320	PvP01_09_v1_685_-_PVP01_0905800_-1	0.455166
AMRU_CQ_AGAGCTTCAGCCTTTC	AMRU	CQ	2852	PvP01_09_v1_685_-_PVP01_0905800_-1	0.177952
AMRU_CQ_AGAGCTTGTACTCTCC	AMRU	CQ	3003	PvP01_09_v1_685_-_PVP01_0905800_-1	0.211349
AMRU_CQ_AGAGCTTTCAACGGGA	AMRU	CQ	2249	PvP01_09_v1_685_-_PVP01_0905800_-1	0.797448
AMRU_CQ_AGAGCTTTCGTGGTCG	AMRU	CQ	2276	PvP01_09_v1_685_-_PVP01_0905800_-1	0.574845
AMRU_CQ_AGAGTGGAGACTAGAT	AMRU	CQ	2788	PvP01_09_v1_685_-_PVP01_0905800_-1	1.7298
AMRU_CQ_AGAGTGGCAGTATCTG	AMRU	CQ	1385	PvP01_09_v1_685_-_PVP01_0905800_-1	0.227842
AMRU_CQ_AGAGTGGGTGAGCGAT	AMRU	CQ	3575	PvP01_09_v1_685_-_PVP01_0905800_-1	0.446503
AMRU_CQ_AGAGTGGGTGGTAACG	AMRU	CQ	1577	PvP01_09_v1_685_-_PVP01_0905800_-1	0.118127
AMRU_CQ_AGAGTGGTCAGAGGTG	AMRU	CQ	2839	PvP01_09_v1_685_-_PVP01_0905800_-1	0
AMRU_CQ_AGATCTGAGTATTGGA	AMRU	CQ	3194	PvP01_09_v1_685_-_PVP01_0905800_-1	0.696335
AMRU_CQ_AGATCTGTCCAAACAC	AMRU	CQ	1438	PvP01_09_v1_685_-_PVP01_0905800_-1	0.29347
AMRU_CQ_AGATTGCTCTTGCAAG	AMRU	CQ	4234	PvP01_09_v1_685_-_PVP01_0905800_-1	0.753343
AMRU_CQ_AGCAGCCAGTAGATGT	AMRU	CQ	3452	PvP01_09_v1_685_-_PVP01_0905800_-1	0
AMRU_CQ_AGCAGCCAGTCGAGTG	AMRU	CQ	2663	PvP01_09_v1_685_-_PVP01_0905800_-1	0.463564
AMRU_CQ_AGCAGCCTCCCACTTG	AMRU	CQ	4469	PvP01_09_v1_685_-_PVP01_0905800_-1	0.158303
AMRU_CQ_AGCATACGTAGAAGGA	AMRU	CQ	4092	PvP01_09_v1_685_-_PVP01_0905800_-1	0.81103
AMRU_CQ_AGCATACGTCCGACGT	AMRU	CQ	1721	PvP01_09_v1_685_-_PVP01_0905800_-1	0.125573
AMRU_CQ_AGCATACTCAAAGACA	AMRU	CQ	2487	PvP01_09_v1_685_-_PVP01_0905800_-1	0.27465
AMRU_CQ_AGCATACTCGCTGATA	AMRU	CQ	2166	PvP01_09_v1_685_-_PVP01_0905800_-1	0.325653
AMRU_CQ_AGCCTAACACCGTTGG	AMRU	CQ	2362	PvP01_09_v1_685_-_PVP01_0905800_-1	0.099985
AMRU_CQ_AGCGGTCAGCGTCTAT	AMRU	CQ	1276	PvP01_09_v1_685_-_PVP01_0905800_-1	0.27907
AMRU_CQ_AGCGGTCAGCTAGTCT	AMRU	CQ	3092	PvP01_09_v1_685_-_PVP01_0905800_-1	0.370634
AMRU_CQ_AGCGGTCCACTGTCGG	AMRU	CQ	3053	PvP01_09_v1_685_-_PVP01_0905800_-1	0.642742
AMRU_CQ_AGCGGTCTCCCGACTT	AMRU	CQ	3274	PvP01_09_v1_685_-_PVP01_0905800_-1	0.850721
AMRU_CQ_AGCGTATAGGCAAAGA	AMRU	CQ	4094	PvP01_09_v1_685_-_PVP01_0905800_-1	0.362932
AMRU_CQ_AGCGTATGTAGCTGCC	AMRU	CQ	1888	PvP01_09_v1_685_-_PVP01_0905800_-1	0.565036
AMRU_CQ_AGCGTATGTTGGTTTG	AMRU	CQ	2262	PvP01_09_v1_685_-_PVP01_0905800_-1	0.737852
AMRU_CQ_AGCGTCGAGGCATTGG	AMRU	CQ	8119	PvP01_09_v1_685_-_PVP01_0905800_-1	0.718133
AMRU_CQ_AGCGTCGGTCACAAGG	AMRU	CQ	2140	PvP01_09_v1_685_-_PVP01_0905800_-1	0.152462
AMRU_CQ_AGCGTCGTCTGGTATG	AMRU	CQ	3841	PvP01_09_v1_685_-_PVP01_0905800_-1	1.84316
AMRU_CQ_AGCTCCTAGCTAAACA	AMRU	CQ	2935	PvP01_09_v1_685_-_PVP01_0905800_-1	0.605174
AMRU_CQ_AGCTCCTAGGGAGTAA	AMRU	CQ	2435	PvP01_09_v1_685_-_PVP01_0905800_-1	0.474058
AMRU_CQ_AGCTCCTTCCACTCCA	AMRU	CQ	3336	PvP01_09_v1_685_-_PVP01_0905800_-1	0.623933
AMRU_CQ_AGCTCCTTCCCGGATG	AMRU	CQ	3836	PvP01_09_v1_685_-_PVP01_0905800_-1	0.200844
AMRU_CQ_AGCTCCTTCGATGAGG	AMRU	CQ	3021	PvP01_09_v1_685_-_PVP01_0905800_-1	1.26601
AMRU_CQ_AGCTCCTTCGGCCGAT	AMRU	CQ	4688	PvP01_09_v1_685_-_PVP01_0905800_-1	2.7907
AMRU_CQ_AGCTCTCAGGATTCGG	AMRU	CQ	3462	PvP01_09_v1_685_-_PVP01_0905800_-1	0.164177
AMRU_CQ_AGCTCTCCAGTTAACC	AMRU	CQ	2175	PvP01_09_v1_685_-_PVP01_0905800_-1	0.731844
AMRU_CQ_AGCTCTCTCGAGGTAG	AMRU	CQ	878	PvP01_09_v1_685_-_PVP01_0905800_-1	0.0619694
AMRU_CQ_AGCTTGAAGAAGAAGC	AMRU	CQ	4391	PvP01_09_v1_685_-_PVP01_0905800_-1	0.331418
AMRU_CQ_AGCTTGAAGAGCTATA	AMRU	CQ	2337	PvP01_09_v1_685_-_PVP01_0905800_-1	0.185995
AMRU_CQ_AGCTTGAGTCTAGAGG	AMRU	CQ	8356	PvP01_09_v1_685_-_PVP01_0905800_-1	0.22786
AMRU_CQ_AGCTTGATCTGGTGTA	AMRU	CQ	3013	PvP01_09_v1_685_-_PVP01_0905800_-1	0.537412
AMRU_CQ_AGGCCACCAGCATGAG	AMRU	CQ	1978	PvP01_09_v1_685_-_PVP01_0905800_-1	0.354904
AMRU_CQ_AGGCCACGTCATTAGC	AMRU	CQ	3128	PvP01_09_v1_685_-_PVP01_0905800_-1	0.0781922
AMRU_CQ_AGGCCACGTCGACTAT	AMRU	CQ	1876	PvP01_09_v1_685_-_PVP01_0905800_-1	0.348614
AMRU_CQ_AGGCCACTCCCAAGAT	AMRU	CQ	3802	PvP01_09_v1_685_-_PVP01_0905800_-1	0.289251
AMRU_CQ_AGGCCGTAGTGCCAGA	AMRU	CQ	8205	PvP01_09_v1_685_-_PVP01_0905800_-1	0.157159
AMRU_CQ_AGGCCGTAGTTAAGTG	AMRU	CQ	2720	PvP01_09_v1_685_-_PVP01_0905800_-1	0.191727
AMRU_CQ_AGGCCGTGTCTGATTG	AMRU	CQ	3475	PvP01_09_v1_685_-_PVP01_0905800_-1	0.166486
AMRU_CQ_AGGCCGTGTTAGATGA	AMRU	CQ	3458	PvP01_09_v1_685_-_PVP01_0905800_-1	0.238124
AMRU_CQ_AGGCCGTTCCTAGTGA	AMRU	CQ	1890	PvP01_09_v1_685_-_PVP01_0905800_-1	0.552334
AMRU_CQ_AGGGAGTCACACAGAG	AMRU	CQ	4511	PvP01_09_v1_685_-_PVP01_0905800_-1	0.0863856
AMRU_CQ_AGGGATGAGATGGCGT	AMRU	CQ	3834	PvP01_09_v1_685_-_PVP01_0905800_-1	1.25907
AMRU_CQ_AGGGATGAGTCTCCTC	AMRU	CQ	4036	PvP01_09_v1_685_-_PVP01_0905800_-1	0.743969
AMRU_CQ_AGGGATGCACGCGAAA	AMRU	CQ	2800	PvP01_09_v1_685_-_PVP01_0905800_-1	0.409189
AMRU_CQ_AGGGATGCAGCTATTG	AMRU	CQ	3445	PvP01_09_v1_685_-_PVP01_0905800_-1	1.07478
AMRU_CQ_AGGGATGGTGGTTTCA	AMRU	CQ	1809	PvP01_09_v1_685_-_PVP01_0905800_-1	0.224568
AMRU_CQ_AGGGTGAAGAAACGAG	AMRU	CQ	3115	PvP01_09_v1_685_-_PVP01_0905800_-1	0.277285
AMRU_CQ_AGGGTGAAGAGCTTCT	AMRU	CQ	1934	PvP01_09_v1_685_-_PVP01_0905800_-1	0.355345
AMRU_CQ_AGGGTGAAGCTAAGAT	AMRU	CQ	2520	PvP01_09_v1_685_-_PVP01_0905800_-1	0.148368
AMRU_CQ_AGGGTGACAATCCGAT	AMRU	CQ	4329	PvP01_09_v1_685_-_PVP01_0905800_-1	0
[truncated: 7,216 more rows]

## Sheet: data19B
GEM	Strain	Monkey	Rank	Window	Expr
AMRU_Ao_AAACCTGAGCTCAACT	AMRU	Ao	1414	PvP01_10_v1_2721_-_PVP01_1031700_3	0
AMRU_Ao_AAACCTGAGTTGAGAT	AMRU	Ao	4806	PvP01_10_v1_2721_-_PVP01_1031700_3	0
AMRU_Ao_AAACCTGGTCAATACC	AMRU	Ao	2836	PvP01_10_v1_2721_-_PVP01_1031700_3	0
AMRU_Ao_AAACCTGGTCATATCG	AMRU	Ao	165	PvP01_10_v1_2721_-_PVP01_1031700_3	0
AMRU_Ao_AAACCTGTCTCGAGTA	AMRU	Ao	4004	PvP01_10_v1_2721_-_PVP01_1031700_3	0.0467968
AMRU_Ao_AAACGGGGTTACGGAG	AMRU	Ao	7193	PvP01_10_v1_2721_-_PVP01_1031700_3	0
AMRU_Ao_AAACGGGGTTATCCGA	AMRU	Ao	36	PvP01_10_v1_2721_-_PVP01_1031700_3	0
AMRU_Ao_AAAGATGAGGTGCACA	AMRU	Ao	4375	PvP01_10_v1_2721_-_PVP01_1031700_3	0
AMRU_Ao_AAAGATGCAGTCGATT	AMRU	Ao	2336	PvP01_10_v1_2721_-_PVP01_1031700_3	0
AMRU_Ao_AAAGATGCATCGTCGG	AMRU	Ao	4878	PvP01_10_v1_2721_-_PVP01_1031700_3	0.0538039
AMRU_Ao_AAAGATGCATGGATGG	AMRU	Ao	1248	PvP01_10_v1_2721_-_PVP01_1031700_3	0
AMRU_Ao_AAAGATGGTGCTCTTC	AMRU	Ao	8874	PvP01_10_v1_2721_-_PVP01_1031700_3	0
AMRU_Ao_AAAGATGTCATGCTCC	AMRU	Ao	8388	PvP01_10_v1_2721_-_PVP01_1031700_3	0
AMRU_Ao_AAAGATGTCTCCTATA	AMRU	Ao	8794	PvP01_10_v1_2721_-_PVP01_1031700_3	0
AMRU_Ao_AAAGCAAAGACACTAA	AMRU	Ao	4505	PvP01_10_v1_2721_-_PVP01_1031700_3	0.151783
AMRU_Ao_AAAGCAAGTTAAGTAG	AMRU	Ao	8767	PvP01_10_v1_2721_-_PVP01_1031700_3	0
AMRU_Ao_AAAGCAATCATCTGCC	AMRU	Ao	3377	PvP01_10_v1_2721_-_PVP01_1031700_3	0
AMRU_Ao_AAAGTAGAGCTACCGC	AMRU	Ao	5164	PvP01_10_v1_2721_-_PVP01_1031700_3	0
AMRU_Ao_AAAGTAGGTGGCAAAC	AMRU	Ao	8613	PvP01_10_v1_2721_-_PVP01_1031700_3	0
AMRU_Ao_AAAGTAGGTGTCAATC	AMRU	Ao	4659	PvP01_10_v1_2721_-_PVP01_1031700_3	0
AMRU_Ao_AAATGCCAGCCAGGAT	AMRU	Ao	2439	PvP01_10_v1_2721_-_PVP01_1031700_3	0
AMRU_Ao_AAATGCCCATAGACTC	AMRU	Ao	5947	PvP01_10_v1_2721_-_PVP01_1031700_3	0.0805672
AMRU_Ao_AAATGCCGTAGGCTGA	AMRU	Ao	5388	PvP01_10_v1_2721_-_PVP01_1031700_3	0
AMRU_Ao_AAATGCCGTCCCTTGT	AMRU	Ao	6020	PvP01_10_v1_2721_-_PVP01_1031700_3	0
AMRU_Ao_AAATGCCGTTGTGGCC	AMRU	Ao	3957	PvP01_10_v1_2721_-_PVP01_1031700_3	0
AMRU_Ao_AAATGCCTCGGTCTAA	AMRU	Ao	644	PvP01_10_v1_2721_-_PVP01_1031700_3	0
AMRU_Ao_AACACGTAGATATGGT	AMRU	Ao	1437	PvP01_10_v1_2721_-_PVP01_1031700_3	0
AMRU_Ao_AACACGTAGGTAGCCA	AMRU	Ao	6963	PvP01_10_v1_2721_-_PVP01_1031700_3	0
AMRU_Ao_AACACGTAGTCACGCC	AMRU	Ao	4636	PvP01_10_v1_2721_-_PVP01_1031700_3	0.0640615
AMRU_Ao_AACACGTGTCGGCACT	AMRU	Ao	6259	PvP01_10_v1_2721_-_PVP01_1031700_3	0
AMRU_Ao_AACACGTGTGTGGCTC	AMRU	Ao	4102	PvP01_10_v1_2721_-_PVP01_1031700_3	0
AMRU_Ao_AACACGTTCCAGTAGT	AMRU	Ao	3441	PvP01_10_v1_2721_-_PVP01_1031700_3	0.046408
AMRU_Ao_AACACGTTCGTCCGTT	AMRU	Ao	4598	PvP01_10_v1_2721_-_PVP01_1031700_3	0.0948137
AMRU_Ao_AACCATGAGTTTAGGA	AMRU	Ao	39	PvP01_10_v1_2721_-_PVP01_1031700_3	0
AMRU_Ao_AACCATGCACGAAACG	AMRU	Ao	3715	PvP01_10_v1_2721_-_PVP01_1031700_3	0
AMRU_Ao_AACCGCGAGATATACG	AMRU	Ao	3216	PvP01_10_v1_2721_-_PVP01_1031700_3	0
AMRU_Ao_AACCGCGCATGCTAGT	AMRU	Ao	7387	PvP01_10_v1_2721_-_PVP01_1031700_3	0
AMRU_Ao_AACGTTGAGTGTCTCA	AMRU	Ao	8805	PvP01_10_v1_2721_-_PVP01_1031700_3	0
AMRU_Ao_AACTCCCCACCGAAAG	AMRU	Ao	7650	PvP01_10_v1_2721_-_PVP01_1031700_3	0
AMRU_Ao_AACTCCCGTATAGGGC	AMRU	Ao	3112	PvP01_10_v1_2721_-_PVP01_1031700_3	0
AMRU_Ao_AACTCCCTCACATGCA	AMRU	Ao	5200	PvP01_10_v1_2721_-_PVP01_1031700_3	0
AMRU_Ao_AACTCTTCAACTGCTA	AMRU	Ao	5029	PvP01_10_v1_2721_-_PVP01_1031700_3	0.108436
AMRU_Ao_AACTCTTTCACTATTC	AMRU	Ao	3408	PvP01_10_v1_2721_-_PVP01_1031700_3	0
AMRU_Ao_AACTGGTCAAGCTGAG	AMRU	Ao	2477	PvP01_10_v1_2721_-_PVP01_1031700_3	0
AMRU_Ao_AACTGGTGTGCGAAAC	AMRU	Ao	1386	PvP01_10_v1_2721_-_PVP01_1031700_3	0
AMRU_Ao_AACTGGTGTGTGACCC	AMRU	Ao	1184	PvP01_10_v1_2721_-_PVP01_1031700_3	0
AMRU_Ao_AACTGGTTCATGCTCC	AMRU	Ao	3022	PvP01_10_v1_2721_-_PVP01_1031700_3	0
AMRU_Ao_AACTGGTTCTGCGACG	AMRU	Ao	4121	PvP01_10_v1_2721_-_PVP01_1031700_3	0
AMRU_Ao_AACTGGTTCTGTCAAG	AMRU	Ao	8455	PvP01_10_v1_2721_-_PVP01_1031700_3	0
AMRU_Ao_AACTTTCAGGTGATTA	AMRU	Ao	4177	PvP01_10_v1_2721_-_PVP01_1031700_3	0.0527649
AMRU_Ao_AACTTTCCAATCTACG	AMRU	Ao	5004	PvP01_10_v1_2721_-_PVP01_1031700_3	0
AMRU_Ao_AACTTTCCATATGAGA	AMRU	Ao	3390	PvP01_10_v1_2721_-_PVP01_1031700_3	0
AMRU_Ao_AAGACCTAGGAGTACC	AMRU	Ao	2872	PvP01_10_v1_2721_-_PVP01_1031700_3	0
AMRU_Ao_AAGACCTCACTTAAGC	AMRU	Ao	8467	PvP01_10_v1_2721_-_PVP01_1031700_3	0
AMRU_Ao_AAGACCTCATCCCATC	AMRU	Ao	5285	PvP01_10_v1_2721_-_PVP01_1031700_3	0
AMRU_Ao_AAGACCTCATTCCTGC	AMRU	Ao	8850	PvP01_10_v1_2721_-_PVP01_1031700_3	0
AMRU_Ao_AAGACCTTCAGCGATT	AMRU	Ao	8096	PvP01_10_v1_2721_-_PVP01_1031700_3	0
AMRU_Ao_AAGCCGCAGCCGGTAA	AMRU	Ao	3072	PvP01_10_v1_2721_-_PVP01_1031700_3	0
AMRU_Ao_AAGCCGCTCAAGATCC	AMRU	Ao	2884	PvP01_10_v1_2721_-_PVP01_1031700_3	0
AMRU_Ao_AAGCCGCTCGCCAAAT	AMRU	Ao	5175	PvP01_10_v1_2721_-_PVP01_1031700_3	0.0342161
AMRU_Ao_AAGGAGCAGGTCGGAT	AMRU	Ao	3607	PvP01_10_v1_2721_-_PVP01_1031700_3	0
AMRU_Ao_AAGGAGCCAAGGTTTC	AMRU	Ao	3160	PvP01_10_v1_2721_-_PVP01_1031700_3	0
AMRU_Ao_AAGGAGCTCCCAAGAT	AMRU	Ao	4056	PvP01_10_v1_2721_-_PVP01_1031700_3	0
AMRU_Ao_AAGGCAGAGTGCCATT	AMRU	Ao	6038	PvP01_10_v1_2721_-_PVP01_1031700_3	0
AMRU_Ao_AAGGCAGGTCCGAACC	AMRU	Ao	8723	PvP01_10_v1_2721_-_PVP01_1031700_3	0
AMRU_Ao_AAGGCAGGTCCGAAGA	AMRU	Ao	2786	PvP01_10_v1_2721_-_PVP01_1031700_3	0
AMRU_Ao_AAGGTTCAGAAACCTA	AMRU	Ao	5908	PvP01_10_v1_2721_-_PVP01_1031700_3	0
AMRU_Ao_AAGGTTCAGCACACAG	AMRU	Ao	3785	PvP01_10_v1_2721_-_PVP01_1031700_3	0
AMRU_Ao_AAGGTTCGTCACACGC	AMRU	Ao	6994	PvP01_10_v1_2721_-_PVP01_1031700_3	0
AMRU_Ao_AAGGTTCTCAGTCAGT	AMRU	Ao	5059	PvP01_10_v1_2721_-_PVP01_1031700_3	0
AMRU_Ao_AAGGTTCTCCGAAGAG	AMRU	Ao	4416	PvP01_10_v1_2721_-_PVP01_1031700_3	0.0958038
AMRU_Ao_AAGGTTCTCGACCAGC	AMRU	Ao	3992	PvP01_10_v1_2721_-_PVP01_1031700_3	0
AMRU_Ao_AAGTCTGAGACTGGGT	AMRU	Ao	4837	PvP01_10_v1_2721_-_PVP01_1031700_3	0
AMRU_Ao_AAGTCTGGTCAATGTC	AMRU	Ao	3168	PvP01_10_v1_2721_-_PVP01_1031700_3	0
AMRU_Ao_AAGTCTGTCGCGTTTC	AMRU	Ao	4340	PvP01_10_v1_2721_-_PVP01_1031700_3	0
AMRU_Ao_AAGTCTGTCGTTGCCT	AMRU	Ao	2531	PvP01_10_v1_2721_-_PVP01_1031700_3	0
AMRU_Ao_AAGTCTGTCTACTCAT	AMRU	Ao	8501	PvP01_10_v1_2721_-_PVP01_1031700_3	0
AMRU_Ao_AATCCAGAGGGTTCCC	AMRU	Ao	7687	PvP01_10_v1_2721_-_PVP01_1031700_3	0
AMRU_Ao_AATCCAGAGTAGCCGA	AMRU	Ao	3573	PvP01_10_v1_2721_-_PVP01_1031700_3	0
AMRU_Ao_AATCCAGGTTACTGAC	AMRU	Ao	4799	PvP01_10_v1_2721_-_PVP01_1031700_3	0
AMRU_Ao_AATCCAGTCAACCAAC	AMRU	Ao	5033	PvP01_10_v1_2721_-_PVP01_1031700_3	0
AMRU_Ao_AATCCAGTCAATCACG	AMRU	Ao	8666	PvP01_10_v1_2721_-_PVP01_1031700_3	0
AMRU_Ao_AATCGGTGTACCCAAT	AMRU	Ao	3617	PvP01_10_v1_2721_-_PVP01_1031700_3	0
AMRU_Ao_ACACCAACAGCGAACA	AMRU	Ao	5038	PvP01_10_v1_2721_-_PVP01_1031700_3	0
AMRU_Ao_ACACCAATCACTTCAT	AMRU	Ao	6962	PvP01_10_v1_2721_-_PVP01_1031700_3	0
AMRU_Ao_ACACCAATCATATCGG	AMRU	Ao	4277	PvP01_10_v1_2721_-_PVP01_1031700_3	0
AMRU_Ao_ACACCGGAGTGTCCCG	AMRU	Ao	4005	PvP01_10_v1_2721_-_PVP01_1031700_3	0
AMRU_Ao_ACACCGGCACGAGGTA	AMRU	Ao	4223	PvP01_10_v1_2721_-_PVP01_1031700_3	0
AMRU_Ao_ACACCGGTCCGCAGTG	AMRU	Ao	45	PvP01_10_v1_2721_-_PVP01_1031700_3	0
AMRU_Ao_ACACTGACACCACGTG	AMRU	Ao	6267	PvP01_10_v1_2721_-_PVP01_1031700_3	0
AMRU_Ao_ACACTGAGTGGTACAG	AMRU	Ao	4819	PvP01_10_v1_2721_-_PVP01_1031700_3	0.0457603
AMRU_Ao_ACACTGATCCGAACGC	AMRU	Ao	4980	PvP01_10_v1_2721_-_PVP01_1031700_3	0.0504261
AMRU_Ao_ACACTGATCGCTAGCG	AMRU	Ao	4434	PvP01_10_v1_2721_-_PVP01_1031700_3	0
AMRU_Ao_ACACTGATCTGTGCAA	AMRU	Ao	8721	PvP01_10_v1_2721_-_PVP01_1031700_3	0
AMRU_Ao_ACAGCCGAGCCAGAAC	AMRU	Ao	4591	PvP01_10_v1_2721_-_PVP01_1031700_3	0
AMRU_Ao_ACAGCCGCAATGGATA	AMRU	Ao	6858	PvP01_10_v1_2721_-_PVP01_1031700_3	0
AMRU_Ao_ACAGCCGCACCAGGTC	AMRU	Ao	3316	PvP01_10_v1_2721_-_PVP01_1031700_3	0
AMRU_Ao_ACAGCCGGTTCAGTAC	AMRU	Ao	9161	PvP01_10_v1_2721_-_PVP01_1031700_3	0
AMRU_Ao_ACAGCTAAGCTGCCCA	AMRU	Ao	367	PvP01_10_v1_2721_-_PVP01_1031700_3	0
AMRU_Ao_ACAGCTACACCACGTG	AMRU	Ao	1498	PvP01_10_v1_2721_-_PVP01_1031700_3	0
AMRU_Ao_ACATACGCACGCTTTC	AMRU	Ao	5135	PvP01_10_v1_2721_-_PVP01_1031700_3	0
AMRU_Ao_ACATACGTCATCGGAT	AMRU	Ao	2436	PvP01_10_v1_2721_-_PVP01_1031700_3	0
AMRU_Ao_ACATCAGAGAGTCTGG	AMRU	Ao	8748	PvP01_10_v1_2721_-_PVP01_1031700_3	0
AMRU_Ao_ACATCAGGTCGACTAT	AMRU	Ao	8810	PvP01_10_v1_2721_-_PVP01_1031700_3	0
AMRU_Ao_ACATCAGTCCATGAAC	AMRU	Ao	4214	PvP01_10_v1_2721_-_PVP01_1031700_3	0
AMRU_Ao_ACATCAGTCTACTTAC	AMRU	Ao	4430	PvP01_10_v1_2721_-_PVP01_1031700_3	0
AMRU_Ao_ACATGGTAGTACATGA	AMRU	Ao	312	PvP01_10_v1_2721_-_PVP01_1031700_3	0
AMRU_Ao_ACATGGTCAACACGCC	AMRU	Ao	7011	PvP01_10_v1_2721_-_PVP01_1031700_3	0
AMRU_Ao_ACATGGTGTAGCGCAA	AMRU	Ao	8300	PvP01_10_v1_2721_-_PVP01_1031700_3	0
AMRU_Ao_ACATGGTTCCAATGGT	AMRU	Ao	26	PvP01_10_v1_2721_-_PVP01_1031700_3	0
AMRU_Ao_ACCAGTACAGCTGTTA	AMRU	Ao	4500	PvP01_10_v1_2721_-_PVP01_1031700_3	0.0394594
AMRU_Ao_ACCAGTATCACATACG	AMRU	Ao	1359	PvP01_10_v1_2721_-_PVP01_1031700_3	0
AMRU_Ao_ACCCACTCACCGATAT	AMRU	Ao	8105	PvP01_10_v1_2721_-_PVP01_1031700_3	0
AMRU_Ao_ACCCACTTCAAACCAC	AMRU	Ao	8782	PvP01_10_v1_2721_-_PVP01_1031700_3	0
AMRU_Ao_ACCCACTTCAACACGT	AMRU	Ao	2740	PvP01_10_v1_2721_-_PVP01_1031700_3	0
AMRU_Ao_ACCCACTTCTTAACCT	AMRU	Ao	8752	PvP01_10_v1_2721_-_PVP01_1031700_3	0
AMRU_Ao_ACCGTAAAGGCTCTTA	AMRU	Ao	8663	PvP01_10_v1_2721_-_PVP01_1031700_3	0
AMRU_Ao_ACCGTAACAGTGGAGT	AMRU	Ao	3484	PvP01_10_v1_2721_-_PVP01_1031700_3	0
AMRU_Ao_ACCGTAAGTGTATGGG	AMRU	Ao	4930	PvP01_10_v1_2721_-_PVP01_1031700_3	0.0734754
AMRU_Ao_ACCTTTAAGGACAGCT	AMRU	Ao	4372	PvP01_10_v1_2721_-_PVP01_1031700_3	0
AMRU_Ao_ACCTTTAGTCTTCAAG	AMRU	Ao	222	PvP01_10_v1_2721_-_PVP01_1031700_3	0
AMRU_Ao_ACCTTTATCCACGTTC	AMRU	Ao	8851	PvP01_10_v1_2721_-_PVP01_1031700_3	0
AMRU_Ao_ACGAGCCAGATGTCGG	AMRU	Ao	3669	PvP01_10_v1_2721_-_PVP01_1031700_3	0.104362
AMRU_Ao_ACGAGCCTCGCAAACT	AMRU	Ao	8978	PvP01_10_v1_2721_-_PVP01_1031700_3	0
AMRU_Ao_ACGAGGAAGTAAGTAC	AMRU	Ao	1696	PvP01_10_v1_2721_-_PVP01_1031700_3	0
AMRU_Ao_ACGAGGACAAACTGCT	AMRU	Ao	5436	PvP01_10_v1_2721_-_PVP01_1031700_3	0
AMRU_Ao_ACGAGGAGTGTGAATA	AMRU	Ao	8567	PvP01_10_v1_2721_-_PVP01_1031700_3	0
AMRU_Ao_ACGATACAGCCGATTT	AMRU	Ao	4730	PvP01_10_v1_2721_-_PVP01_1031700_3	0
AMRU_Ao_ACGATACCACAGCCCA	AMRU	Ao	2675	PvP01_10_v1_2721_-_PVP01_1031700_3	0
AMRU_Ao_ACGATACCACGGTGTC	AMRU	Ao	5499	PvP01_10_v1_2721_-_PVP01_1031700_3	0
AMRU_Ao_ACGATACGTAGGGTAC	AMRU	Ao	4854	PvP01_10_v1_2721_-_PVP01_1031700_3	0
AMRU_Ao_ACGATACGTTACGCGC	AMRU	Ao	2438	PvP01_10_v1_2721_-_PVP01_1031700_3	0
AMRU_Ao_ACGATGTGTGTTTGGT	AMRU	Ao	4644	PvP01_10_v1_2721_-_PVP01_1031700_3	0
AMRU_Ao_ACGCAGCCAAGGCTCC	AMRU	Ao	175	PvP01_10_v1_2721_-_PVP01_1031700_3	0
AMRU_Ao_ACGCAGCCACGGACAA	AMRU	Ao	3871	PvP01_10_v1_2721_-_PVP01_1031700_3	0
AMRU_Ao_ACGCCAGCAGTTAACC	AMRU	Ao	814	PvP01_10_v1_2721_-_PVP01_1031700_3	0
AMRU_Ao_ACGCCAGGTTCGTGAT	AMRU	Ao	2792	PvP01_10_v1_2721_-_PVP01_1031700_3	0
AMRU_Ao_ACGCCAGTCAACCATG	AMRU	Ao	1226	PvP01_10_v1_2721_-_PVP01_1031700_3	0
AMRU_Ao_ACGCCGAAGAAACCGC	AMRU	Ao	5108	PvP01_10_v1_2721_-_PVP01_1031700_3	0
AMRU_Ao_ACGCCGAAGTGGGATC	AMRU	Ao	3366	PvP01_10_v1_2721_-_PVP01_1031700_3	0
AMRU_Ao_ACGCCGATCATGCATG	AMRU	Ao	8779	PvP01_10_v1_2721_-_PVP01_1031700_3	0
AMRU_Ao_ACGGAGAAGCAGACTG	AMRU	Ao	8769	PvP01_10_v1_2721_-_PVP01_1031700_3	0
AMRU_Ao_ACGGAGAGTCTCATCC	AMRU	Ao	2256	PvP01_10_v1_2721_-_PVP01_1031700_3	0
AMRU_Ao_ACGGAGAGTGGTCCGT	AMRU	Ao	463	PvP01_10_v1_2721_-_PVP01_1031700_3	0
AMRU_Ao_ACGGAGAGTTCGAATC	AMRU	Ao	4091	PvP01_10_v1_2721_-_PVP01_1031700_3	0
AMRU_Ao_ACGGAGATCAGTTCGA	AMRU	Ao	4487	PvP01_10_v1_2721_-_PVP01_1031700_3	0.0820816
AMRU_Ao_ACGGAGATCCGCAAGC	AMRU	Ao	3827	PvP01_10_v1_2721_-_PVP01_1031700_3	0.0617246
AMRU_Ao_ACGGAGATCTCTGCTG	AMRU	Ao	4141	PvP01_10_v1_2721_-_PVP01_1031700_3	0
AMRU_Ao_ACGGCCAAGATCCCAT	AMRU	Ao	4298	PvP01_10_v1_2721_-_PVP01_1031700_3	0
AMRU_Ao_ACGGCCACAAAGGCGT	AMRU	Ao	8703	PvP01_10_v1_2721_-_PVP01_1031700_3	0
AMRU_Ao_ACGGCCACATCCGTGG	AMRU	Ao	5629	PvP01_10_v1_2721_-_PVP01_1031700_3	0
AMRU_Ao_ACGGCCACATGGTAGG	AMRU	Ao	6339	PvP01_10_v1_2721_-_PVP01_1031700_3	0.0372232
AMRU_Ao_ACGGCCAGTGAGCGAT	AMRU	Ao	3304	PvP01_10_v1_2721_-_PVP01_1031700_3	0
AMRU_Ao_ACGGCCATCGGCGGTT	AMRU	Ao	5400	PvP01_10_v1_2721_-_PVP01_1031700_3	0.0556081
AMRU_Ao_ACGGGCTAGACTAGAT	AMRU	Ao	4161	PvP01_10_v1_2721_-_PVP01_1031700_3	0.11936
AMRU_Ao_ACGGGCTAGCTAACAA	AMRU	Ao	5215	PvP01_10_v1_2721_-_PVP01_1031700_3	0.101092
AMRU_Ao_ACGGGCTAGTCTTGCA	AMRU	Ao	4956	PvP01_10_v1_2721_-_PVP01_1031700_3	0
AMRU_Ao_ACGGGCTCACCGATAT	AMRU	Ao	1852	PvP01_10_v1_2721_-_PVP01_1031700_3	0
AMRU_Ao_ACGGGCTGTATTCGTG	AMRU	Ao	3434	PvP01_10_v1_2721_-_PVP01_1031700_3	0
AMRU_Ao_ACGGGCTTCATGTGGT	AMRU	Ao	3771	PvP01_10_v1_2721_-_PVP01_1031700_3	0
AMRU_Ao_ACGGGTCAGGTGATAT	AMRU	Ao	5352	PvP01_10_v1_2721_-_PVP01_1031700_3	0.170155
AMRU_Ao_ACGGGTCCACGTAAGG	AMRU	Ao	3029	PvP01_10_v1_2721_-_PVP01_1031700_3	0
AMRU_Ao_ACGGGTCTCGGAATCT	AMRU	Ao	4795	PvP01_10_v1_2721_-_PVP01_1031700_3	0
AMRU_Ao_ACGTCAAAGACTTTCG	AMRU	Ao	4575	PvP01_10_v1_2721_-_PVP01_1031700_3	0
AMRU_Ao_ACGTCAAAGCACCGTC	AMRU	Ao	8342	PvP01_10_v1_2721_-_PVP01_1031700_3	0
AMRU_Ao_ACGTCAAAGCTGCCCA	AMRU	Ao	4197	PvP01_10_v1_2721_-_PVP01_1031700_3	0
AMRU_Ao_ACGTCAACATGTTCCC	AMRU	Ao	1562	PvP01_10_v1_2721_-_PVP01_1031700_3	0
AMRU_Ao_ACTATCTGTGCACTTA	AMRU	Ao	4731	PvP01_10_v1_2721_-_PVP01_1031700_3	0
AMRU_Ao_ACTATCTTCCGTAGTA	AMRU	Ao	2267	PvP01_10_v1_2721_-_PVP01_1031700_3	0
AMRU_Ao_ACTGAACCAATAGAGT	AMRU	Ao	2016	PvP01_10_v1_2721_-_PVP01_1031700_3	0
AMRU_Ao_ACTGAACGTACTCAAC	AMRU	Ao	3689	PvP01_10_v1_2721_-_PVP01_1031700_3	0.05003
AMRU_Ao_ACTGAGTAGAGCAATT	AMRU	Ao	7695	PvP01_10_v1_2721_-_PVP01_1031700_3	0
AMRU_Ao_ACTGAGTAGATATACG	AMRU	Ao	3555	PvP01_10_v1_2721_-_PVP01_1031700_3	0
AMRU_Ao_ACTGAGTAGCAAATCA	AMRU	Ao	4319	PvP01_10_v1_2721_-_PVP01_1031700_3	0
AMRU_Ao_ACTGAGTCAAAGGCGT	AMRU	Ao	6008	PvP01_10_v1_2721_-_PVP01_1031700_3	0
AMRU_Ao_ACTGCTCAGACGACGT	AMRU	Ao	2335	PvP01_10_v1_2721_-_PVP01_1031700_3	0
AMRU_Ao_ACTGCTCCAGGATCGA	AMRU	Ao	3547	PvP01_10_v1_2721_-_PVP01_1031700_3	0
AMRU_Ao_ACTGCTCCAGTCTTCC	AMRU	Ao	391	PvP01_10_v1_2721_-_PVP01_1031700_3	0
AMRU_Ao_ACTGTCCAGCTGGAAC	AMRU	Ao	1449	PvP01_10_v1_2721_-_PVP01_1031700_3	0
AMRU_Ao_ACTGTCCCACGTGAGA	AMRU	Ao	8200	PvP01_10_v1_2721_-_PVP01_1031700_3	0
AMRU_Ao_ACTGTCCCATTCGACA	AMRU	Ao	4293	PvP01_10_v1_2721_-_PVP01_1031700_3	0
AMRU_Ao_ACTGTCCTCCTACAGA	AMRU	Ao	8835	PvP01_10_v1_2721_-_PVP01_1031700_3	0.0225327
AMRU_Ao_ACTGTCCTCCTGCTTG	AMRU	Ao	5900	PvP01_10_v1_2721_-_PVP01_1031700_3	0
AMRU_Ao_ACTGTCCTCGCCAAAT	AMRU	Ao	3510	PvP01_10_v1_2721_-_PVP01_1031700_3	0
AMRU_Ao_ACTTACTAGAAGAAGC	AMRU	Ao	8354	PvP01_10_v1_2721_-_PVP01_1031700_3	0
AMRU_Ao_ACTTACTCAGATCCAT	AMRU	Ao	1812	PvP01_10_v1_2721_-_PVP01_1031700_3	0
AMRU_Ao_ACTTACTCATGAACCT	AMRU	Ao	6192	PvP01_10_v1_2721_-_PVP01_1031700_3	0
AMRU_Ao_ACTTACTGTCCCTTGT	AMRU	Ao	51	PvP01_10_v1_2721_-_PVP01_1031700_3	0
AMRU_Ao_ACTTGTTAGTTTGCGT	AMRU	Ao	3071	PvP01_10_v1_2721_-_PVP01_1031700_3	0
AMRU_Ao_ACTTGTTGTGCAGTAG	AMRU	Ao	7782	PvP01_10_v1_2721_-_PVP01_1031700_3	0
AMRU_Ao_ACTTGTTTCACCATAG	AMRU	Ao	2467	PvP01_10_v1_2721_-_PVP01_1031700_3	0
AMRU_Ao_ACTTGTTTCCTAGAAC	AMRU	Ao	2953	PvP01_10_v1_2721_-_PVP01_1031700_3	0
AMRU_Ao_ACTTTCAAGAAGGGTA	AMRU	Ao	5105	PvP01_10_v1_2721_-_PVP01_1031700_3	0
AMRU_Ao_ACTTTCAAGCGCTCCA	AMRU	Ao	4343	PvP01_10_v1_2721_-_PVP01_1031700_3	0
AMRU_Ao_ACTTTCACATTACGAC	AMRU	Ao	3515	PvP01_10_v1_2721_-_PVP01_1031700_3	0
AMRU_Ao_ACTTTCAGTAAATGAC	AMRU	Ao	8655	PvP01_10_v1_2721_-_PVP01_1031700_3	0
AMRU_Ao_ACTTTCAGTACATGTC	AMRU	Ao	2877	PvP01_10_v1_2721_-_PVP01_1031700_3	0
AMRU_Ao_AGAATAGAGGCCCTTG	AMRU	Ao	1715	PvP01_10_v1_2721_-_PVP01_1031700_3	0
AMRU_Ao_AGAATAGAGGGATGGG	AMRU	Ao	4796	PvP01_10_v1_2721_-_PVP01_1031700_3	0
AMRU_Ao_AGAATAGAGGGCATGT	AMRU	Ao	1013	PvP01_10_v1_2721_-_PVP01_1031700_3	0
AMRU_Ao_AGACGTTGTCACACGC	AMRU	Ao	7255	PvP01_10_v1_2721_-_PVP01_1031700_3	0
AMRU_Ao_AGACGTTTCGGTGTCG	AMRU	Ao	5564	PvP01_10_v1_2721_-_PVP01_1031700_3	0.111669
AMRU_Ao_AGAGCGAAGAGAACAG	AMRU	Ao	1271	PvP01_10_v1_2721_-_PVP01_1031700_3	0
AMRU_Ao_AGAGCGAAGCGTGTCC	AMRU	Ao	9160	PvP01_10_v1_2721_-_PVP01_1031700_3	0
AMRU_Ao_AGAGCGACATGCTAGT	AMRU	Ao	4524	PvP01_10_v1_2721_-_PVP01_1031700_3	0.0917515
AMRU_Ao_AGAGCGAGTTCCACGG	AMRU	Ao	5189	PvP01_10_v1_2721_-_PVP01_1031700_3	0.0391206
AMRU_Ao_AGAGCGATCGCCTGTT	AMRU	Ao	2007	PvP01_10_v1_2721_-_PVP01_1031700_3	0
AMRU_Ao_AGAGCTTAGTGAAGAG	AMRU	Ao	6506	PvP01_10_v1_2721_-_PVP01_1031700_3	0
AMRU_Ao_AGAGCTTCACCATGTA	AMRU	Ao	7950	PvP01_10_v1_2721_-_PVP01_1031700_3	0
AMRU_Ao_AGAGCTTCATCTCCCA	AMRU	Ao	2670	PvP01_10_v1_2721_-_PVP01_1031700_3	0
AMRU_Ao_AGAGCTTTCATCGCTC	AMRU	Ao	3994	PvP01_10_v1_2721_-_PVP01_1031700_3	0
AMRU_Ao_AGAGTGGCAAGCGTAG	AMRU	Ao	4578	PvP01_10_v1_2721_-_PVP01_1031700_3	0.0677277
AMRU_Ao_AGAGTGGCACAGGTTT	AMRU	Ao	5224	PvP01_10_v1_2721_-_PVP01_1031700_3	0.0715103
AMRU_Ao_AGAGTGGCAGCCTGTG	AMRU	Ao	4890	PvP01_10_v1_2721_-_PVP01_1031700_3	0.0454463
AMRU_Ao_AGAGTGGGTATAGGTA	AMRU	Ao	4347	PvP01_10_v1_2721_-_PVP01_1031700_3	0
AMRU_Ao_AGAGTGGGTCCAGTGC	AMRU	Ao	7573	PvP01_10_v1_2721_-_PVP01_1031700_3	0
AMRU_Ao_AGAGTGGTCACAAACC	AMRU	Ao	3842	PvP01_10_v1_2721_-_PVP01_1031700_3	0.0682734
AMRU_Ao_AGAGTGGTCACTTACT	AMRU	Ao	5632	PvP01_10_v1_2721_-_PVP01_1031700_3	0.144061
AMRU_Ao_AGAGTGGTCGTACCGG	AMRU	Ao	6171	PvP01_10_v1_2721_-_PVP01_1031700_3	0
AMRU_Ao_AGATCTGAGACTGGGT	AMRU	Ao	8972	PvP01_10_v1_2721_-_PVP01_1031700_3	0
AMRU_Ao_AGATCTGAGCTAACTC	AMRU	Ao	4475	PvP01_10_v1_2721_-_PVP01_1031700_3	0
AMRU_Ao_AGATCTGCATTAACCG	AMRU	Ao	5371	PvP01_10_v1_2721_-_PVP01_1031700_3	0.0901469
AMRU_Ao_AGATCTGGTCGCGAAA	AMRU	Ao	47	PvP01_10_v1_2721_-_PVP01_1031700_3	0
AMRU_Ao_AGATTGCCAATGGACG	AMRU	Ao	9066	PvP01_10_v1_2721_-_PVP01_1031700_3	0
AMRU_Ao_AGATTGCGTTTGCATG	AMRU	Ao	8052	PvP01_10_v1_2721_-_PVP01_1031700_3	0
AMRU_Ao_AGATTGCTCACCCGAG	AMRU	Ao	7933	PvP01_10_v1_2721_-_PVP01_1031700_3	0
AMRU_Ao_AGATTGCTCACGGTTA	AMRU	Ao	8731	PvP01_10_v1_2721_-_PVP01_1031700_3	0
AMRU_Ao_AGCAGCCGTCAGAAGC	AMRU	Ao	8113	PvP01_10_v1_2721_-_PVP01_1031700_3	0
AMRU_Ao_AGCAGCCGTGCAGGTA	AMRU	Ao	5335	PvP01_10_v1_2721_-_PVP01_1031700_3	0.0411726
AMRU_Ao_AGCATACAGAATAGGG	AMRU	Ao	4668	PvP01_10_v1_2721_-_PVP01_1031700_3	0.0416719
AMRU_Ao_AGCATACAGAGAGCTC	AMRU	Ao	1804	PvP01_10_v1_2721_-_PVP01_1031700_3	0
AMRU_Ao_AGCATACCATACGCCG	AMRU	Ao	4165	PvP01_10_v1_2721_-_PVP01_1031700_3	0
AMRU_Ao_AGCATACGTCGCGTGT	AMRU	Ao	1556	PvP01_10_v1_2721_-_PVP01_1031700_3	0
AMRU_Ao_AGCATACGTGCAACGA	AMRU	Ao	7678	PvP01_10_v1_2721_-_PVP01_1031700_3	0
AMRU_Ao_AGCATACTCTCCGGTT	AMRU	Ao	2134	PvP01_10_v1_2721_-_PVP01_1031700_3	0
AMRU_Ao_AGCCTAAAGCGTTGCC	AMRU	Ao	3343	PvP01_10_v1_2721_-_PVP01_1031700_3	0
AMRU_Ao_AGCCTAACACGCGAAA	AMRU	Ao	3061	PvP01_10_v1_2721_-_PVP01_1031700_3	0
AMRU_Ao_AGCCTAATCTTGACGA	AMRU	Ao	28	PvP01_10_v1_2721_-_PVP01_1031700_3	0
AMRU_Ao_AGCGGTCAGTTCGATC	AMRU	Ao	4907	PvP01_10_v1_2721_-_PVP01_1031700_3	0
AMRU_Ao_AGCGGTCCACACATGT	AMRU	Ao	5940	PvP01_10_v1_2721_-_PVP01_1031700_3	0.0499027
AMRU_Ao_AGCGGTCTCTGCGTAA	AMRU	Ao	8363	PvP01_10_v1_2721_-_PVP01_1031700_3	0
AMRU_Ao_AGCGTATAGTGTTTGC	AMRU	Ao	6254	PvP01_10_v1_2721_-_PVP01_1031700_3	0.0644164
AMRU_Ao_AGCGTATGTACTTGAC	AMRU	Ao	4230	PvP01_10_v1_2721_-_PVP01_1031700_3	0
AMRU_Ao_AGCGTATTCAGATAAG	AMRU	Ao	4362	PvP01_10_v1_2721_-_PVP01_1031700_3	0
AMRU_Ao_AGCGTCGAGGGATCTG	AMRU	Ao	3757	PvP01_10_v1_2721_-_PVP01_1031700_3	0
AMRU_Ao_AGCGTCGTCGTCACGG	AMRU	Ao	6270	PvP01_10_v1_2721_-_PVP01_1031700_3	0.108448
AMRU_Ao_AGCGTCGTCGTTTGCC	AMRU	Ao	4357	PvP01_10_v1_2721_-_PVP01_1031700_3	0
AMRU_Ao_AGCTCCTAGATGCGAC	AMRU	Ao	4681	PvP01_10_v1_2721_-_PVP01_1031700_3	0
AMRU_Ao_AGCTCCTAGGGTCGAT	AMRU	Ao	4815	PvP01_10_v1_2721_-_PVP01_1031700_3	0.0494267
AMRU_Ao_AGCTCCTCAATGAAAC	AMRU	Ao	4830	PvP01_10_v1_2721_-_PVP01_1031700_3	0.0668516
AMRU_Ao_AGCTCCTGTCTGGAGA	AMRU	Ao	5944	PvP01_10_v1_2721_-_PVP01_1031700_3	0.0512873
AMRU_Ao_AGCTCCTGTTCCCTTG	AMRU	Ao	7717	PvP01_10_v1_2721_-_PVP01_1031700_3	0
AMRU_Ao_AGCTCCTTCCAGAGGA	AMRU	Ao	5662	PvP01_10_v1_2721_-_PVP01_1031700_3	0
AMRU_Ao_AGCTCCTTCGCCTGAG	AMRU	Ao	4672	PvP01_10_v1_2721_-_PVP01_1031700_3	0
AMRU_Ao_AGCTCCTTCTTGCATT	AMRU	Ao	4068	PvP01_10_v1_2721_-_PVP01_1031700_3	0
AMRU_Ao_AGCTCTCCAGATCTGT	AMRU	Ao	5578	PvP01_10_v1_2721_-_PVP01_1031700_3	0
AMRU_Ao_AGCTCTCGTTACGCGC	AMRU	Ao	4027	PvP01_10_v1_2721_-_PVP01_1031700_3	0
AMRU_Ao_AGCTTGACAACACCCG	AMRU	Ao	3569	PvP01_10_v1_2721_-_PVP01_1031700_3	0
AMRU_Ao_AGCTTGATCGAATGGG	AMRU	Ao	6497	PvP01_10_v1_2721_-_PVP01_1031700_3	0
AMRU_Ao_AGGCCACAGCCCAACC	AMRU	Ao	4078	PvP01_10_v1_2721_-_PVP01_1031700_3	0
AMRU_Ao_AGGCCACAGCTGCAAG	AMRU	Ao	2461	PvP01_10_v1_2721_-_PVP01_1031700_3	0
AMRU_Ao_AGGCCACCACCCATTC	AMRU	Ao	3628	PvP01_10_v1_2721_-_PVP01_1031700_3	0
AMRU_Ao_AGGCCGTAGCTCTCGG	AMRU	Ao	5864	PvP01_10_v1_2721_-_PVP01_1031700_3	0.0964041
AMRU_Ao_AGGGAGTAGCTCCTCT	AMRU	Ao	5676	PvP01_10_v1_2721_-_PVP01_1031700_3	0
AMRU_Ao_AGGGAGTCATAAAGGT	AMRU	Ao	2072	PvP01_10_v1_2721_-_PVP01_1031700_3	0
AMRU_Ao_AGGGAGTGTTTAAGCC	AMRU	Ao	8846	PvP01_10_v1_2721_-_PVP01_1031700_3	0
AMRU_Ao_AGGGAGTTCTTACCTA	AMRU	Ao	3837	PvP01_10_v1_2721_-_PVP01_1031700_3	0
AMRU_Ao_AGGGATGAGAGGTTGC	AMRU	Ao	1697	PvP01_10_v1_2721_-_PVP01_1031700_3	0
AMRU_Ao_AGGGATGCAATCGGTT	AMRU	Ao	2446	PvP01_10_v1_2721_-_PVP01_1031700_3	0
AMRU_Ao_AGGGATGCAGCGTCCA	AMRU	Ao	2434	PvP01_10_v1_2721_-_PVP01_1031700_3	0
AMRU_Ao_AGGGATGCATCGATTG	AMRU	Ao	4406	PvP01_10_v1_2721_-_PVP01_1031700_3	0.0456997
AMRU_Ao_AGGGATGTCTCTGAGA	AMRU	Ao	7624	PvP01_10_v1_2721_-_PVP01_1031700_3	0
AMRU_Ao_AGGGTGACACATTTCT	AMRU	Ao	4597	PvP01_10_v1_2721_-_PVP01_1031700_3	0
AMRU_Ao_AGGGTGAGTTAGGGTG	AMRU	Ao	7968	PvP01_10_v1_2721_-_PVP01_1031700_3	0
AMRU_Ao_AGGTCATAGATGAGAG	AMRU	Ao	6455	PvP01_10_v1_2721_-_PVP01_1031700_3	0.0383333
AMRU_Ao_AGGTCATGTAAGAGAG	AMRU	Ao	8932	PvP01_10_v1_2721_-_PVP01_1031700_3	0
AMRU_Ao_AGGTCCGCAATCTACG	AMRU	Ao	5705	PvP01_10_v1_2721_-_PVP01_1031700_3	0.0790389
AMRU_Ao_AGGTCCGCATGGGAAC	AMRU	Ao	6356	PvP01_10_v1_2721_-_PVP01_1031700_3	0.0756029
AMRU_Ao_AGGTCCGGTTTGTGTG	AMRU	Ao	8929	PvP01_10_v1_2721_-_PVP01_1031700_3	0
AMRU_Ao_AGTAGTCCAGGCAGTA	AMRU	Ao	8624	PvP01_10_v1_2721_-_PVP01_1031700_3	0
AMRU_Ao_AGTAGTCCAGTATAAG	AMRU	Ao	7935	PvP01_10_v1_2721_-_PVP01_1031700_3	0
AMRU_Ao_AGTAGTCGTGTATGGG	AMRU	Ao	4630	PvP01_10_v1_2721_-_PVP01_1031700_3	0
AMRU_Ao_AGTAGTCTCACAGGCC	AMRU	Ao	4747	PvP01_10_v1_2721_-_PVP01_1031700_3	0
AMRU_Ao_AGTCTTTAGAGTAAGG	AMRU	Ao	1975	PvP01_10_v1_2721_-_PVP01_1031700_3	0
AMRU_Ao_AGTCTTTTCATTTGGG	AMRU	Ao	6705	PvP01_10_v1_2721_-_PVP01_1031700_3	0.0863856
AMRU_Ao_AGTCTTTTCTATCCTA	AMRU	Ao	3043	PvP01_10_v1_2721_-_PVP01_1031700_3	0
AMRU_Ao_AGTGAGGAGAAACCTA	AMRU	Ao	5759	PvP01_10_v1_2721_-_PVP01_1031700_3	0
AMRU_Ao_AGTGAGGTCAGCTCGG	AMRU	Ao	2571	PvP01_10_v1_2721_-_PVP01_1031700_3	0
AMRU_Ao_AGTGAGGTCATGTAGC	AMRU	Ao	8239	PvP01_10_v1_2721_-_PVP01_1031700_3	0
AMRU_Ao_AGTGGGAAGCTAAGAT	AMRU	Ao	2900	PvP01_10_v1_2721_-_PVP01_1031700_3	0
AMRU_Ao_AGTGGGACAGTCAGCC	AMRU	Ao	3055	PvP01_10_v1_2721_-_PVP01_1031700_3	0
AMRU_Ao_AGTGGGAGTGCACCAC	AMRU	Ao	1107	PvP01_10_v1_2721_-_PVP01_1031700_3	0
AMRU_Ao_AGTGGGATCATTGCCC	AMRU	Ao	8754	PvP01_10_v1_2721_-_PVP01_1031700_3	0
AMRU_Ao_AGTGTCAAGGTCATCT	AMRU	Ao	4855	PvP01_10_v1_2721_-_PVP01_1031700_3	0
AMRU_Ao_AGTGTCAGTACTTAGC	AMRU	Ao	4585	PvP01_10_v1_2721_-_PVP01_1031700_3	0
AMRU_Ao_AGTGTCATCCTTGGTC	AMRU	Ao	7604	PvP01_10_v1_2721_-_PVP01_1031700_3	0
AMRU_Ao_AGTTGGTAGAATTCCC	AMRU	Ao	3818	PvP01_10_v1_2721_-_PVP01_1031700_3	0
AMRU_Ao_AGTTGGTAGATCCCAT	AMRU	Ao	3943	PvP01_10_v1_2721_-_PVP01_1031700_3	0
AMRU_Ao_AGTTGGTCAGAGTGTG	AMRU	Ao	2778	PvP01_10_v1_2721_-_PVP01_1031700_3	0
AMRU_Ao_AGTTGGTCAGTTCATG	AMRU	Ao	2108	PvP01_10_v1_2721_-_PVP01_1031700_3	0
AMRU_Ao_AGTTGGTGTCCAGTGC	AMRU	Ao	3520	PvP01_10_v1_2721_-_PVP01_1031700_3	0
AMRU_Ao_ATAACGCCAGGACCCT	AMRU	Ao	3438	PvP01_10_v1_2721_-_PVP01_1031700_3	0
AMRU_Ao_ATAACGCCAGTATCTG	AMRU	Ao	6990	PvP01_10_v1_2721_-_PVP01_1031700_3	0
AMRU_Ao_ATAACGCGTTATGCGT	AMRU	Ao	8646	PvP01_10_v1_2721_-_PVP01_1031700_3	0
AMRU_Ao_ATAACGCTCAGCTGGC	AMRU	Ao	2207	PvP01_10_v1_2721_-_PVP01_1031700_3	0
AMRU_Ao_ATAACGCTCCGCGCAA	AMRU	Ao	1336	PvP01_10_v1_2721_-_PVP01_1031700_3	0
AMRU_Ao_ATAACGCTCTGTCTAT	AMRU	Ao	6470	PvP01_10_v1_2721_-_PVP01_1031700_3	0.0936505
AMRU_Ao_ATAAGAGAGATGCCTT	AMRU	Ao	8250	PvP01_10_v1_2721_-_PVP01_1031700_3	0
AMRU_Ao_ATAAGAGGTAGATTAG	AMRU	Ao	3485	PvP01_10_v1_2721_-_PVP01_1031700_3	0
AMRU_Ao_ATAAGAGTCAATCACG	AMRU	Ao	4144	PvP01_10_v1_2721_-_PVP01_1031700_3	0
AMRU_Ao_ATAGACCCATGGAATA	AMRU	Ao	2058	PvP01_10_v1_2721_-_PVP01_1031700_3	0
AMRU_Ao_ATAGACCGTGCAACTT	AMRU	Ao	1345	PvP01_10_v1_2721_-_PVP01_1031700_3	0
AMRU_Ao_ATAGACCGTTAAGAAC	AMRU	Ao	1155	PvP01_10_v1_2721_-_PVP01_1031700_3	0
AMRU_Ao_ATCACGAAGATAGGAG	AMRU	Ao	4054	PvP01_10_v1_2721_-_PVP01_1031700_3	0
AMRU_Ao_ATCACGATCTACTTAC	AMRU	Ao	3284	PvP01_10_v1_2721_-_PVP01_1031700_3	0
AMRU_Ao_ATCATCTAGAGCTATA	AMRU	Ao	692	PvP01_10_v1_2721_-_PVP01_1031700_3	0
AMRU_Ao_ATCATCTCACATTTCT	AMRU	Ao	6619	PvP01_10_v1_2721_-_PVP01_1031700_3	0.0950119
AMRU_Ao_ATCATCTCAGGGATTG	AMRU	Ao	5836	PvP01_10_v1_2721_-_PVP01_1031700_3	0
AMRU_Ao_ATCATCTTCGTCACGG	AMRU	Ao	2111	PvP01_10_v1_2721_-_PVP01_1031700_3	0
AMRU_Ao_ATCATGGCAATGGAGC	AMRU	Ao	8397	PvP01_10_v1_2721_-_PVP01_1031700_3	0
AMRU_Ao_ATCATGGGTGACGGTA	AMRU	Ao	4246	PvP01_10_v1_2721_-_PVP01_1031700_3	0
AMRU_Ao_ATCATGGGTGCATCTA	AMRU	Ao	8073	PvP01_10_v1_2721_-_PVP01_1031700_3	0
AMRU_Ao_ATCCACCAGTCTCCTC	AMRU	Ao	8336	PvP01_10_v1_2721_-_PVP01_1031700_3	0
AMRU_Ao_ATCCACCTCGGCTACG	AMRU	Ao	4738	PvP01_10_v1_2721_-_PVP01_1031700_3	0
AMRU_Ao_ATCCACCTCTTAGCCC	AMRU	Ao	4039	PvP01_10_v1_2721_-_PVP01_1031700_3	0
AMRU_Ao_ATCCGAAAGCACACAG	AMRU	Ao	4447	PvP01_10_v1_2721_-_PVP01_1031700_3	0
AMRU_Ao_ATCCGAACACTGAAGG	AMRU	Ao	8425	PvP01_10_v1_2721_-_PVP01_1031700_3	0
AMRU_Ao_ATCCGAACATGCCTTC	AMRU	Ao	5582	PvP01_10_v1_2721_-_PVP01_1031700_3	0.0350373
AMRU_Ao_ATCCGAATCCCAACGG	AMRU	Ao	7830	PvP01_10_v1_2721_-_PVP01_1031700_3	0
AMRU_Ao_ATCCGAATCCTCCTAG	AMRU	Ao	4752	PvP01_10_v1_2721_-_PVP01_1031700_3	0
AMRU_Ao_ATCCGAATCTACCAGA	AMRU	Ao	8832	PvP01_10_v1_2721_-_PVP01_1031700_3	0
AMRU_Ao_ATCCGAATCTGTCCGT	AMRU	Ao	6206	PvP01_10_v1_2721_-_PVP01_1031700_3	0
AMRU_Ao_ATCGAGTAGCTAGCCC	AMRU	Ao	3821	PvP01_10_v1_2721_-_PVP01_1031700_3	0
AMRU_Ao_ATCGAGTCATCTGGTA	AMRU	Ao	7157	PvP01_10_v1_2721_-_PVP01_1031700_3	0
AMRU_Ao_ATCGAGTGTGAAATCA	AMRU	Ao	5784	PvP01_10_v1_2721_-_PVP01_1031700_3	0.051843
AMRU_Ao_ATCGAGTGTTTGTGTG	AMRU	Ao	8217	PvP01_10_v1_2721_-_PVP01_1031700_3	0
AMRU_Ao_ATCGAGTTCAACACCA	AMRU	Ao	8453	PvP01_10_v1_2721_-_PVP01_1031700_3	0
AMRU_Ao_ATCTACTAGGCCGAAT	AMRU	Ao	1467	PvP01_10_v1_2721_-_PVP01_1031700_3	0
AMRU_Ao_ATCTACTCAATCCGAT	AMRU	Ao	8733	PvP01_10_v1_2721_-_PVP01_1031700_3	0
AMRU_Ao_ATCTACTCAGGTGGAT	AMRU	Ao	8495	PvP01_10_v1_2721_-_PVP01_1031700_3	0
AMRU_Ao_ATCTACTGTAAACACA	AMRU	Ao	1164	PvP01_10_v1_2721_-_PVP01_1031700_3	0
AMRU_Ao_ATCTACTGTACCGGCT	AMRU	Ao	3989	PvP01_10_v1_2721_-_PVP01_1031700_3	0.0512926
AMRU_Ao_ATCTACTGTCTAGCCG	AMRU	Ao	2310	PvP01_10_v1_2721_-_PVP01_1031700_3	0
AMRU_Ao_ATCTACTTCGCATGGC	AMRU	Ao	1472	PvP01_10_v1_2721_-_PVP01_1031700_3	0
AMRU_Ao_ATCTGCCAGACCGGAT	AMRU	Ao	6828	PvP01_10_v1_2721_-_PVP01_1031700_3	0
AMRU_Ao_ATCTGCCAGCGAGAAA	AMRU	Ao	5140	PvP01_10_v1_2721_-_PVP01_1031700_3	0
AMRU_Ao_ATCTGCCGTGATGTCT	AMRU	Ao	611	PvP01_10_v1_2721_-_PVP01_1031700_3	0
AMRU_Ao_ATGAGGGAGGATGGAA	AMRU	Ao	8875	PvP01_10_v1_2721_-_PVP01_1031700_3	0
AMRU_Ao_ATGAGGGCATATGGTC	AMRU	Ao	1068	PvP01_10_v1_2721_-_PVP01_1031700_3	0
AMRU_Ao_ATGAGGGGTGAGGGAG	AMRU	Ao	5101	PvP01_10_v1_2721_-_PVP01_1031700_3	0
AMRU_Ao_ATGAGGGGTGTGGTTT	AMRU	Ao	4761	PvP01_10_v1_2721_-_PVP01_1031700_3	0
AMRU_Ao_ATGAGGGTCCAGAGGA	AMRU	Ao	8297	PvP01_10_v1_2721_-_PVP01_1031700_3	0
AMRU_Ao_ATGCGATAGTACGCGA	AMRU	Ao	3671	PvP01_10_v1_2721_-_PVP01_1031700_3	0
AMRU_Ao_ATGCGATGTAGCAAAT	AMRU	Ao	3535	PvP01_10_v1_2721_-_PVP01_1031700_3	0
AMRU_Ao_ATGGGAGAGCACCGTC	AMRU	Ao	5006	PvP01_10_v1_2721_-_PVP01_1031700_3	0
AMRU_Ao_ATGGGAGCACGCTTTC	AMRU	Ao	3876	PvP01_10_v1_2721_-_PVP01_1031700_3	0
AMRU_Ao_ATGGGAGCATACAGCT	AMRU	Ao	4562	PvP01_10_v1_2721_-_PVP01_1031700_3	0
AMRU_Ao_ATGGGAGTCCACGCAG	AMRU	Ao	3944	PvP01_10_v1_2721_-_PVP01_1031700_3	0
AMRU_Ao_ATGTGTGAGGGCTCTC	AMRU	Ao	2949	PvP01_10_v1_2721_-_PVP01_1031700_3	0
AMRU_Ao_ATGTGTGCAAGAAAGG	AMRU	Ao	5422	PvP01_10_v1_2721_-_PVP01_1031700_3	0
AMRU_Ao_ATGTGTGCACCAGCAC	AMRU	Ao	5713	PvP01_10_v1_2721_-_PVP01_1031700_3	0
AMRU_Ao_ATTATCCAGGATGTAT	AMRU	Ao	2148	PvP01_10_v1_2721_-_PVP01_1031700_3	0
AMRU_Ao_ATTATCCAGTGCCAGA	AMRU	Ao	8207	PvP01_10_v1_2721_-_PVP01_1031700_3	0
AMRU_Ao_ATTATCCCATCACAAC	AMRU	Ao	4257	PvP01_10_v1_2721_-_PVP01_1031700_3	0
AMRU_Ao_ATTATCCTCACGCGGT	AMRU	Ao	4558	PvP01_10_v1_2721_-_PVP01_1031700_3	0
AMRU_Ao_ATTCTACCAACGATGG	AMRU	Ao	5791	PvP01_10_v1_2721_-_PVP01_1031700_3	0
AMRU_Ao_ATTCTACCATGTTCCC	AMRU	Ao	3768	PvP01_10_v1_2721_-_PVP01_1031700_3	0
AMRU_Ao_ATTCTACGTTCCACAA	AMRU	Ao	8739	PvP01_10_v1_2721_-_PVP01_1031700_3	0
AMRU_Ao_ATTCTACTCGTTGCCT	AMRU	Ao	3967	PvP01_10_v1_2721_-_PVP01_1031700_3	0
AMRU_Ao_ATTGGACAGACACTAA	AMRU	Ao	3381	PvP01_10_v1_2721_-_PVP01_1031700_3	0
AMRU_Ao_ATTGGACAGGAATTAC	AMRU	Ao	1586	PvP01_10_v1_2721_-_PVP01_1031700_3	0
AMRU_Ao_ATTGGACGTCCTCTTG	AMRU	Ao	4776	PvP01_10_v1_2721_-_PVP01_1031700_3	0
AMRU_Ao_ATTGGACTCTGCTGCT	AMRU	Ao	2932	PvP01_10_v1_2721_-_PVP01_1031700_3	0
AMRU_Ao_ATTGGACTCTTCGAGA	AMRU	Ao	6015	PvP01_10_v1_2721_-_PVP01_1031700_3	0.0615574
AMRU_Ao_ATTGGACTCTTGTTTG	AMRU	Ao	3794	PvP01_10_v1_2721_-_PVP01_1031700_3	0
AMRU_Ao_ATTGGTGCACGGATAG	AMRU	Ao	6664	PvP01_10_v1_2721_-_PVP01_1031700_3	0
AMRU_Ao_ATTGGTGCAGACAAGC	AMRU	Ao	4926	PvP01_10_v1_2721_-_PVP01_1031700_3	0.168209
AMRU_Ao_ATTGGTGGTCTAAACC	AMRU	Ao	2542	PvP01_10_v1_2721_-_PVP01_1031700_3	0
AMRU_Ao_ATTGGTGGTTTAGCTG	AMRU	Ao	3783	PvP01_10_v1_2721_-_PVP01_1031700_3	0
AMRU_Ao_ATTTCTGCACTACAGT	AMRU	Ao	3525	PvP01_10_v1_2721_-_PVP01_1031700_3	0
AMRU_Ao_ATTTCTGCAGGTCTCG	AMRU	Ao	6938	PvP01_10_v1_2721_-_PVP01_1031700_3	0
AMRU_Ao_ATTTCTGGTCAGGACA	AMRU	Ao	1754	PvP01_10_v1_2721_-_PVP01_1031700_3	0
AMRU_Ao_ATTTCTGGTCCGTGAC	AMRU	Ao	1197	PvP01_10_v1_2721_-_PVP01_1031700_3	0
AMRU_Ao_ATTTCTGGTCTCAACA	AMRU	Ao	7608	PvP01_10_v1_2721_-_PVP01_1031700_3	0
AMRU_Ao_ATTTCTGTCCCAGGTG	AMRU	Ao	4220	PvP01_10_v1_2721_-_PVP01_1031700_3	0
AMRU_Ao_ATTTCTGTCTACCTGC	AMRU	Ao	2737	PvP01_10_v1_2721_-_PVP01_1031700_3	0
AMRU_Ao_CAACCAAAGAAACGAG	AMRU	Ao	4105	PvP01_10_v1_2721_-_PVP01_1031700_3	0
AMRU_Ao_CAACCAAGTAGCTTGT	AMRU	Ao	6519	PvP01_10_v1_2721_-_PVP01_1031700_3	0.0959049
AMRU_Ao_CAACCAAGTCGGCTCA	AMRU	Ao	97	PvP01_10_v1_2721_-_PVP01_1031700_3	0
AMRU_Ao_CAACCAAGTCTAGTGT	AMRU	Ao	4117	PvP01_10_v1_2721_-_PVP01_1031700_3	0
AMRU_Ao_CAACCAATCAGTGCAT	AMRU	Ao	5964	PvP01_10_v1_2721_-_PVP01_1031700_3	0
AMRU_Ao_CAACCTCCACCGAAAG	AMRU	Ao	2916	PvP01_10_v1_2721_-_PVP01_1031700_3	0
AMRU_Ao_CAACCTCGTATCACCA	AMRU	Ao	4972	PvP01_10_v1_2721_-_PVP01_1031700_3	0
AMRU_Ao_CAACCTCGTTAGAACA	AMRU	Ao	2165	PvP01_10_v1_2721_-_PVP01_1031700_3	0
AMRU_Ao_CAACTAGAGCGATAGC	AMRU	Ao	2726	PvP01_10_v1_2721_-_PVP01_1031700_3	0
AMRU_Ao_CAAGAAACACTAGTAC	AMRU	Ao	8370	PvP01_10_v1_2721_-_PVP01_1031700_3	0
AMRU_Ao_CAAGAAAGTTGAGGTG	AMRU	Ao	5728	PvP01_10_v1_2721_-_PVP01_1031700_3	0.0525652
AMRU_Ao_CAAGATCAGTGAACGC	AMRU	Ao	2427	PvP01_10_v1_2721_-_PVP01_1031700_3	0
AMRU_Ao_CAAGATCCACATGTGT	AMRU	Ao	5241	PvP01_10_v1_2721_-_PVP01_1031700_3	0
AMRU_Ao_CAAGATCGTACCGGCT	AMRU	Ao	3777	PvP01_10_v1_2721_-_PVP01_1031700_3	0
AMRU_Ao_CAAGATCGTCATATCG	AMRU	Ao	5340	PvP01_10_v1_2721_-_PVP01_1031700_3	0
AMRU_Ao_CAAGATCGTCCCGACA	AMRU	Ao	4249	PvP01_10_v1_2721_-_PVP01_1031700_3	0
AMRU_Ao_CAAGATCTCTATGTGG	AMRU	Ao	6744	PvP01_10_v1_2721_-_PVP01_1031700_3	0.0464317
AMRU_Ao_CAAGGCCAGACGCTTT	AMRU	Ao	8216	PvP01_10_v1_2721_-_PVP01_1031700_3	0
AMRU_Ao_CAAGGCCTCAGGTAAA	AMRU	Ao	3643	PvP01_10_v1_2721_-_PVP01_1031700_3	0
AMRU_Ao_CAAGGCCTCCGTCAAA	AMRU	Ao	5618	PvP01_10_v1_2721_-_PVP01_1031700_3	0
AMRU_Ao_CAAGTTGAGGCATGTG	AMRU	Ao	7164	PvP01_10_v1_2721_-_PVP01_1031700_3	0
AMRU_Ao_CAAGTTGTCCTTGGTC	AMRU	Ao	4158	PvP01_10_v1_2721_-_PVP01_1031700_3	0
AMRU_Ao_CACAAACAGAATGTGT	AMRU	Ao	3001	PvP01_10_v1_2721_-_PVP01_1031700_3	0.108589
AMRU_Ao_CACAAACCATGATCCA	AMRU	Ao	4173	PvP01_10_v1_2721_-_PVP01_1031700_3	0
AMRU_Ao_CACAAACGTTCGCGAC	AMRU	Ao	2889	PvP01_10_v1_2721_-_PVP01_1031700_3	0
AMRU_Ao_CACAAACTCGCTTGTC	AMRU	Ao	8206	PvP01_10_v1_2721_-_PVP01_1031700_3	0
AMRU_Ao_CACAAACTCTTCTGGC	AMRU	Ao	1834	PvP01_10_v1_2721_-_PVP01_1031700_3	0
AMRU_Ao_CACACAAAGAGTCGGT	AMRU	Ao	3062	PvP01_10_v1_2721_-_PVP01_1031700_3	0
AMRU_Ao_CACACAAAGTCCGGTC	AMRU	Ao	5933	PvP01_10_v1_2721_-_PVP01_1031700_3	0
AMRU_Ao_CACACAAAGTGGACGT	AMRU	Ao	1983	PvP01_10_v1_2721_-_PVP01_1031700_3	0
AMRU_Ao_CACACAACATTGGGCC	AMRU	Ao	2028	PvP01_10_v1_2721_-_PVP01_1031700_3	0
AMRU_Ao_CACACTCCAGCCTGTG	AMRU	Ao	4437	PvP01_10_v1_2721_-_PVP01_1031700_3	0
AMRU_Ao_CACAGGCAGGCGACAT	AMRU	Ao	6168	PvP01_10_v1_2721_-_PVP01_1031700_3	0
AMRU_Ao_CACAGGCGTCTGGAGA	AMRU	Ao	5464	PvP01_10_v1_2721_-_PVP01_1031700_3	0
AMRU_Ao_CACATAGGTACTCGCG	AMRU	Ao	6456	PvP01_10_v1_2721_-_PVP01_1031700_3	0.101379
AMRU_Ao_CACATAGTCCAAACTG	AMRU	Ao	29	PvP01_10_v1_2721_-_PVP01_1031700_3	0
AMRU_Ao_CACATTTGTTAGTGGG	AMRU	Ao	4724	PvP01_10_v1_2721_-_PVP01_1031700_3	0.0930189
AMRU_Ao_CACATTTTCAATCACG	AMRU	Ao	2330	PvP01_10_v1_2721_-_PVP01_1031700_3	0
AMRU_Ao_CACCACTCATCACGAT	AMRU	Ao	1270	PvP01_10_v1_2721_-_PVP01_1031700_3	0
AMRU_Ao_CACCACTGTAGCCTCG	AMRU	Ao	3350	PvP01_10_v1_2721_-_PVP01_1031700_3	0
AMRU_Ao_CACCACTTCCTGTAGA	AMRU	Ao	3729	PvP01_10_v1_2721_-_PVP01_1031700_3	0
AMRU_Ao_CACCAGGAGTGGGCTA	AMRU	Ao	2020	PvP01_10_v1_2721_-_PVP01_1031700_3	0
AMRU_Ao_CACCAGGGTGAAAGAG	AMRU	Ao	3605	PvP01_10_v1_2721_-_PVP01_1031700_3	0
AMRU_Ao_CACCTTGAGCTAACAA	AMRU	Ao	4680	PvP01_10_v1_2721_-_PVP01_1031700_3	0.0459517
AMRU_Ao_CACCTTGTCGTATCAG	AMRU	Ao	4528	PvP01_10_v1_2721_-_PVP01_1031700_3	0
AMRU_Ao_CACCTTGTCTTGGGTA	AMRU	Ao	2001	PvP01_10_v1_2721_-_PVP01_1031700_3	0
AMRU_Ao_CACTCCAAGCTTCGCG	AMRU	Ao	4226	PvP01_10_v1_2721_-_PVP01_1031700_3	0.066212
AMRU_Ao_CACTCCATCAAACCGT	AMRU	Ao	1431	PvP01_10_v1_2721_-_PVP01_1031700_3	0
AMRU_Ao_CAGAATCAGCGATTCT	AMRU	Ao	2895	PvP01_10_v1_2721_-_PVP01_1031700_3	0
AMRU_Ao_CAGAATCAGGACACCA	AMRU	Ao	7925	PvP01_10_v1_2721_-_PVP01_1031700_3	0
AMRU_Ao_CAGAATCAGGCTCTTA	AMRU	Ao	2835	PvP01_10_v1_2721_-_PVP01_1031700_3	0
AMRU_Ao_CAGAATCTCGATCCCT	AMRU	Ao	2152	PvP01_10_v1_2721_-_PVP01_1031700_3	0
AMRU_Ao_CAGAGAGCAGACGCCT	AMRU	Ao	3861	PvP01_10_v1_2721_-_PVP01_1031700_3	0
AMRU_Ao_CAGAGAGCATCACGAT	AMRU	Ao	1821	PvP01_10_v1_2721_-_PVP01_1031700_3	0
AMRU_Ao_CAGAGAGCATGAGCGA	AMRU	Ao	8949	PvP01_10_v1_2721_-_PVP01_1031700_3	0
AMRU_Ao_CAGAGAGTCCACTCCA	AMRU	Ao	31	PvP01_10_v1_2721_-_PVP01_1031700_3	0
AMRU_Ao_CAGAGAGTCCCAACGG	AMRU	Ao	1503	PvP01_10_v1_2721_-_PVP01_1031700_3	0
AMRU_Ao_CAGATCAAGCTAAGAT	AMRU	Ao	2012	PvP01_10_v1_2721_-_PVP01_1031700_3	0
AMRU_Ao_CAGATCAAGGCTCATT	AMRU	Ao	8826	PvP01_10_v1_2721_-_PVP01_1031700_3	0
AMRU_Ao_CAGATCAGTACACCGC	AMRU	Ao	7855	PvP01_10_v1_2721_-_PVP01_1031700_3	0
AMRU_Ao_CAGATCAGTTCAGGCC	AMRU	Ao	9062	PvP01_10_v1_2721_-_PVP01_1031700_3	0
AMRU_Ao_CAGATCATCCCACTTG	AMRU	Ao	3202	PvP01_10_v1_2721_-_PVP01_1031700_3	0
AMRU_Ao_CAGATCATCCTATGTT	AMRU	Ao	4516	PvP01_10_v1_2721_-_PVP01_1031700_3	0
AMRU_Ao_CAGCAGCAGATCGATA	AMRU	Ao	2560	PvP01_10_v1_2721_-_PVP01_1031700_3	0.0805283
AMRU_Ao_CAGCAGCGTATAGGTA	AMRU	Ao	8345	PvP01_10_v1_2721_-_PVP01_1031700_3	0
AMRU_Ao_CAGCAGCGTGTGACCC	AMRU	Ao	5133	PvP01_10_v1_2721_-_PVP01_1031700_3	0.0948092
AMRU_Ao_CAGCATAAGTCAATAG	AMRU	Ao	3156	PvP01_10_v1_2721_-_PVP01_1031700_3	0
AMRU_Ao_CAGCATAAGTGCTGCC	AMRU	Ao	2323	PvP01_10_v1_2721_-_PVP01_1031700_3	0
AMRU_Ao_CAGCCGAAGCGTGAGT	AMRU	Ao	3991	PvP01_10_v1_2721_-_PVP01_1031700_3	0
AMRU_Ao_CAGCCGACAAAGGAAG	AMRU	Ao	735	PvP01_10_v1_2721_-_PVP01_1031700_3	0
AMRU_Ao_CAGCCGAGTCCTGCTT	AMRU	Ao	8743	PvP01_10_v1_2721_-_PVP01_1031700_3	0
AMRU_Ao_CAGCGACCACCGATAT	AMRU	Ao	8899	PvP01_10_v1_2721_-_PVP01_1031700_3	0
AMRU_Ao_CAGCGACCAGGTCTCG	AMRU	Ao	6698	PvP01_10_v1_2721_-_PVP01_1031700_3	0.125094
AMRU_Ao_CAGCGACGTAGGCATG	AMRU	Ao	4635	PvP01_10_v1_2721_-_PVP01_1031700_3	0
AMRU_Ao_CAGCGACTCACCCGAG	AMRU	Ao	5007	PvP01_10_v1_2721_-_PVP01_1031700_3	0.129271
AMRU_Ao_CAGCGACTCCATGCTC	AMRU	Ao	2599	PvP01_10_v1_2721_-_PVP01_1031700_3	0
AMRU_Ao_CAGCGACTCGACGGAA	AMRU	Ao	177	PvP01_10_v1_2721_-_PVP01_1031700_3	0
AMRU_Ao_CAGCTAAAGACCGGAT	AMRU	Ao	1989	PvP01_10_v1_2721_-_PVP01_1031700_3	0
AMRU_Ao_CAGCTAAAGTGTGAAT	AMRU	Ao	4393	PvP01_10_v1_2721_-_PVP01_1031700_3	0
AMRU_Ao_CAGCTAACAAACCCAT	AMRU	Ao	2110	PvP01_10_v1_2721_-_PVP01_1031700_3	0
AMRU_Ao_CAGCTAAGTAAGGGCT	AMRU	Ao	2742	PvP01_10_v1_2721_-_PVP01_1031700_3	0
AMRU_Ao_CAGCTAAGTACCTACA	AMRU	Ao	4594	PvP01_10_v1_2721_-_PVP01_1031700_3	0
AMRU_Ao_CAGCTAATCTTCATGT	AMRU	Ao	3093	PvP01_10_v1_2721_-_PVP01_1031700_3	0
AMRU_Ao_CAGCTGGAGGAGCGAG	AMRU	Ao	8774	PvP01_10_v1_2721_-_PVP01_1031700_3	0
AMRU_Ao_CAGCTGGAGTGTACCT	AMRU	Ao	4632	PvP01_10_v1_2721_-_PVP01_1031700_3	0
AMRU_Ao_CAGCTGGCATCTATGG	AMRU	Ao	5518	PvP01_10_v1_2721_-_PVP01_1031700_3	0.0463607
AMRU_Ao_CAGCTGGTCAACGCTA	AMRU	Ao	3037	PvP01_10_v1_2721_-_PVP01_1031700_3	0
AMRU_Ao_CAGGTGCAGATCGGGT	AMRU	Ao	3723	PvP01_10_v1_2721_-_PVP01_1031700_3	0
AMRU_Ao_CAGGTGCCAATAGCAA	AMRU	Ao	4074	PvP01_10_v1_2721_-_PVP01_1031700_3	0
AMRU_Ao_CAGGTGCCACGAGGTA	AMRU	Ao	8693	PvP01_10_v1_2721_-_PVP01_1031700_3	0
AMRU_Ao_CAGGTGCCATGACGGA	AMRU	Ao	2305	PvP01_10_v1_2721_-_PVP01_1031700_3	0
AMRU_Ao_CAGGTGCGTACACCGC	AMRU	Ao	4750	PvP01_10_v1_2721_-_PVP01_1031700_3	0
AMRU_Ao_CAGGTGCGTTCAACCA	AMRU	Ao	3293	PvP01_10_v1_2721_-_PVP01_1031700_3	0
AMRU_Ao_CAGGTGCGTTGCGCAC	AMRU	Ao	8069	PvP01_10_v1_2721_-_PVP01_1031700_3	0
AMRU_Ao_CAGTAACCACTATCTT	AMRU	Ao	4300	PvP01_10_v1_2721_-_PVP01_1031700_3	0
AMRU_Ao_CAGTAACTCAGGCAAG	AMRU	Ao	3351	PvP01_10_v1_2721_-_PVP01_1031700_3	0
AMRU_Ao_CAGTCCTAGTGTCCCG	AMRU	Ao	8487	PvP01_10_v1_2721_-_PVP01_1031700_3	0
AMRU_Ao_CAGTCCTCAATCGGTT	AMRU	Ao	3780	PvP01_10_v1_2721_-_PVP01_1031700_3	0
AMRU_Ao_CAGTCCTGTCTGCCAG	AMRU	Ao	6305	PvP01_10_v1_2721_-_PVP01_1031700_3	0.0517411
AMRU_Ao_CAGTCCTTCGCCAAAT	AMRU	Ao	5378	PvP01_10_v1_2721_-_PVP01_1031700_3	0
AMRU_Ao_CAGTCCTTCGGCGCTA	AMRU	Ao	3565	PvP01_10_v1_2721_-_PVP01_1031700_3	0
AMRU_Ao_CATATGGAGTGAAGAG	AMRU	Ao	3923	PvP01_10_v1_2721_-_PVP01_1031700_3	0
AMRU_Ao_CATATGGCAAACAACA	AMRU	Ao	4016	PvP01_10_v1_2721_-_PVP01_1031700_3	0
AMRU_Ao_CATATTCAGAAGCCCA	AMRU	Ao	7852	PvP01_10_v1_2721_-_PVP01_1031700_3	0
AMRU_Ao_CATATTCAGCGGCTTC	AMRU	Ao	8904	PvP01_10_v1_2721_-_PVP01_1031700_3	0
AMRU_Ao_CATATTCAGGCTCAGA	AMRU	Ao	8332	PvP01_10_v1_2721_-_PVP01_1031700_3	0
AMRU_Ao_CATATTCCAAACCCAT	AMRU	Ao	2969	PvP01_10_v1_2721_-_PVP01_1031700_3	0
AMRU_Ao_CATATTCCATCCCATC	AMRU	Ao	4060	PvP01_10_v1_2721_-_PVP01_1031700_3	0
AMRU_Ao_CATATTCGTAACGTTC	AMRU	Ao	8153	PvP01_10_v1_2721_-_PVP01_1031700_3	0
AMRU_Ao_CATATTCGTATCTGCA	AMRU	Ao	2378	PvP01_10_v1_2721_-_PVP01_1031700_3	0
AMRU_Ao_CATATTCTCAGTACGT	AMRU	Ao	3411	PvP01_10_v1_2721_-_PVP01_1031700_3	0
AMRU_Ao_CATCAAGAGAAGATTC	AMRU	Ao	8146	PvP01_10_v1_2721_-_PVP01_1031700_3	0
AMRU_Ao_CATCAAGAGAATGTGT	AMRU	Ao	8895	PvP01_10_v1_2721_-_PVP01_1031700_3	0
AMRU_Ao_CATCAAGAGCACAGGT	AMRU	Ao	7965	PvP01_10_v1_2721_-_PVP01_1031700_3	0
AMRU_Ao_CATCAAGCAATGGTCT	AMRU	Ao	4495	PvP01_10_v1_2721_-_PVP01_1031700_3	0.127578
AMRU_Ao_CATCAAGGTCACACGC	AMRU	Ao	3562	PvP01_10_v1_2721_-_PVP01_1031700_3	0
AMRU_Ao_CATCAAGGTGTAAGTA	AMRU	Ao	9165	PvP01_10_v1_2721_-_PVP01_1031700_3	0
AMRU_Ao_CATCAGAAGCTAGGCA	AMRU	Ao	3009	PvP01_10_v1_2721_-_PVP01_1031700_3	0
AMRU_Ao_CATCAGACAGCATGAG	AMRU	Ao	7848	PvP01_10_v1_2721_-_PVP01_1031700_3	0
AMRU_Ao_CATCAGATCCAGAGGA	AMRU	Ao	3652	PvP01_10_v1_2721_-_PVP01_1031700_3	0
AMRU_Ao_CATCCACAGATCCCGC	AMRU	Ao	2723	PvP01_10_v1_2721_-_PVP01_1031700_3	0
AMRU_Ao_CATCCACCACAACGCC	AMRU	Ao	3941	PvP01_10_v1_2721_-_PVP01_1031700_3	0
AMRU_Ao_CATCGAACAGGACCCT	AMRU	Ao	6082	PvP01_10_v1_2721_-_PVP01_1031700_3	0
AMRU_Ao_CATCGAACAGGTCCAC	AMRU	Ao	3710	PvP01_10_v1_2721_-_PVP01_1031700_3	0
AMRU_Ao_CATCGAAGTCCGACGT	AMRU	Ao	4371	PvP01_10_v1_2721_-_PVP01_1031700_3	0
AMRU_Ao_CATCGAAGTGCGCTTG	AMRU	Ao	5794	PvP01_10_v1_2721_-_PVP01_1031700_3	0
AMRU_Ao_CATCGGGAGCTTTGGT	AMRU	Ao	9065	PvP01_10_v1_2721_-_PVP01_1031700_3	0
AMRU_Ao_CATCGGGCAGATTGCT	AMRU	Ao	2813	PvP01_10_v1_2721_-_PVP01_1031700_3	0
AMRU_Ao_CATCGGGCATCTGGTA	AMRU	Ao	2116	PvP01_10_v1_2721_-_PVP01_1031700_3	0
AMRU_Ao_CATCGGGGTCTAACGT	AMRU	Ao	3404	PvP01_10_v1_2721_-_PVP01_1031700_3	0
AMRU_Ao_CATCGGGGTCTAGCCG	AMRU	Ao	5154	PvP01_10_v1_2721_-_PVP01_1031700_3	0.0672314
AMRU_Ao_CATCGGGGTTCAGACT	AMRU	Ao	3126	PvP01_10_v1_2721_-_PVP01_1031700_3	0
AMRU_Ao_CATGACAAGGATGCGT	AMRU	Ao	3639	PvP01_10_v1_2721_-_PVP01_1031700_3	0
AMRU_Ao_CATGACACAGACGCAA	AMRU	Ao	5745	PvP01_10_v1_2721_-_PVP01_1031700_3	0
AMRU_Ao_CATGACAGTAGGCTGA	AMRU	Ao	6041	PvP01_10_v1_2721_-_PVP01_1031700_3	0.0431258
AMRU_Ao_CATGACATCATCGCTC	AMRU	Ao	4087	PvP01_10_v1_2721_-_PVP01_1031700_3	0.0982704
AMRU_Ao_CATGCCTAGAGTGAGA	AMRU	Ao	6348	PvP01_10_v1_2721_-_PVP01_1031700_3	0.0498828
AMRU_Ao_CATGCCTAGTTACGGG	AMRU	Ao	44	PvP01_10_v1_2721_-_PVP01_1031700_3	0
AMRU_Ao_CATGCCTGTATTCTCT	AMRU	Ao	4596	PvP01_10_v1_2721_-_PVP01_1031700_3	0.050035
AMRU_Ao_CATGGCGCAGTAAGCG	AMRU	Ao	4328	PvP01_10_v1_2721_-_PVP01_1031700_3	0
AMRU_Ao_CATGGCGGTCAACATC	AMRU	Ao	5153	PvP01_10_v1_2721_-_PVP01_1031700_3	0
AMRU_Ao_CATGGCGTCAACGGGA	AMRU	Ao	2715	PvP01_10_v1_2721_-_PVP01_1031700_3	0
AMRU_Ao_CATGGCGTCCATGCTC	AMRU	Ao	6768	PvP01_10_v1_2721_-_PVP01_1031700_3	0
AMRU_Ao_CATGGCGTCCCACTTG	AMRU	Ao	2685	PvP01_10_v1_2721_-_PVP01_1031700_3	0
AMRU_Ao_CATTATCAGATAGCAT	AMRU	Ao	2163	PvP01_10_v1_2721_-_PVP01_1031700_3	0
AMRU_Ao_CATTATCCAATCACAC	AMRU	Ao	2644	PvP01_10_v1_2721_-_PVP01_1031700_3	0
AMRU_Ao_CATTATCCAGGACCCT	AMRU	Ao	8815	PvP01_10_v1_2721_-_PVP01_1031700_3	0
AMRU_Ao_CATTATCCAGGGTACA	AMRU	Ao	2480	PvP01_10_v1_2721_-_PVP01_1031700_3	0
AMRU_Ao_CATTATCTCATGGTCA	AMRU	Ao	6979	PvP01_10_v1_2721_-_PVP01_1031700_3	0
AMRU_Ao_CATTATCTCCAGTAGT	AMRU	Ao	4940	PvP01_10_v1_2721_-_PVP01_1031700_3	0
AMRU_Ao_CATTATCTCGGCGGTT	AMRU	Ao	68	PvP01_10_v1_2721_-_PVP01_1031700_3	0
AMRU_Ao_CATTCGCCAAGCCGCT	AMRU	Ao	5081	PvP01_10_v1_2721_-_PVP01_1031700_3	0
AMRU_Ao_CATTCGCCATCAGTAC	AMRU	Ao	3257	PvP01_10_v1_2721_-_PVP01_1031700_3	0.0489285
AMRU_Ao_CATTCGCCATGTAAGA	AMRU	Ao	2646	PvP01_10_v1_2721_-_PVP01_1031700_3	0
AMRU_Ao_CATTCGCGTGCCTGCA	AMRU	Ao	3402	PvP01_10_v1_2721_-_PVP01_1031700_3	0
AMRU_Ao_CATTCGCTCAAACGGG	AMRU	Ao	2444	PvP01_10_v1_2721_-_PVP01_1031700_3	0
AMRU_Ao_CCAATCCAGTCAATAG	AMRU	Ao	3889	PvP01_10_v1_2721_-_PVP01_1031700_3	0
AMRU_Ao_CCAATCCGTACCATCA	AMRU	Ao	8737	PvP01_10_v1_2721_-_PVP01_1031700_3	0
AMRU_Ao_CCAATCCGTTGCTCCT	AMRU	Ao	5471	PvP01_10_v1_2721_-_PVP01_1031700_3	0.0481928
AMRU_Ao_CCACCTAAGCCAACAG	AMRU	Ao	4037	PvP01_10_v1_2721_-_PVP01_1031700_3	0
AMRU_Ao_CCACCTAGTGACAAAT	AMRU	Ao	8202	PvP01_10_v1_2721_-_PVP01_1031700_3	0
AMRU_Ao_CCACCTAGTTGTTTGG	AMRU	Ao	4955	PvP01_10_v1_2721_-_PVP01_1031700_3	0
AMRU_Ao_CCACCTATCAACCAAC	AMRU	Ao	9067	PvP01_10_v1_2721_-_PVP01_1031700_3	0
AMRU_Ao_CCACCTATCCTCAATT	AMRU	Ao	8933	PvP01_10_v1_2721_-_PVP01_1031700_3	0
AMRU_Ao_CCACGGAAGAGACTAT	AMRU	Ao	364	PvP01_10_v1_2721_-_PVP01_1031700_3	0
AMRU_Ao_CCACGGACACAACGCC	AMRU	Ao	7362	PvP01_10_v1_2721_-_PVP01_1031700_3	0
AMRU_Ao_CCACGGACACCAACCG	AMRU	Ao	5171	PvP01_10_v1_2721_-_PVP01_1031700_3	0
AMRU_Ao_CCACGGAGTTCTCATT	AMRU	Ao	2283	PvP01_10_v1_2721_-_PVP01_1031700_3	0
AMRU_Ao_CCACTACCAACAACCT	AMRU	Ao	8692	PvP01_10_v1_2721_-_PVP01_1031700_3	0
AMRU_Ao_CCACTACGTGCCTGGT	AMRU	Ao	3647	PvP01_10_v1_2721_-_PVP01_1031700_3	0
AMRU_Ao_CCACTACTCTATCCTA	AMRU	Ao	4268	PvP01_10_v1_2721_-_PVP01_1031700_3	0
AMRU_Ao_CCAGCGAAGAGCAATT	AMRU	Ao	3773	PvP01_10_v1_2721_-_PVP01_1031700_3	0
AMRU_Ao_CCAGCGAGTAAGGGCT	AMRU	Ao	400	PvP01_10_v1_2721_-_PVP01_1031700_3	0
AMRU_Ao_CCAGCGAGTCGGATCC	AMRU	Ao	4185	PvP01_10_v1_2721_-_PVP01_1031700_3	0
AMRU_Ao_CCATGTCGTGCGATAG	AMRU	Ao	2209	PvP01_10_v1_2721_-_PVP01_1031700_3	0
AMRU_Ao_CCATGTCTCCAACCAA	AMRU	Ao	7808	PvP01_10_v1_2721_-_PVP01_1031700_3	0
AMRU_Ao_CCATGTCTCCGCATCT	AMRU	Ao	4099	PvP01_10_v1_2721_-_PVP01_1031700_3	0
AMRU_Ao_CCATTCGAGTGTCCCG	AMRU	Ao	4576	PvP01_10_v1_2721_-_PVP01_1031700_3	0.0425586
AMRU_Ao_CCATTCGCAGTGAGTG	AMRU	Ao	8437	PvP01_10_v1_2721_-_PVP01_1031700_3	0
AMRU_Ao_CCATTCGGTTATGCGT	AMRU	Ao	5242	PvP01_10_v1_2721_-_PVP01_1031700_3	0
AMRU_Ao_CCATTCGTCGTTGACA	AMRU	Ao	1878	PvP01_10_v1_2721_-_PVP01_1031700_3	0
AMRU_Ao_CCCAATCAGCGTCAAG	AMRU	Ao	2284	PvP01_10_v1_2721_-_PVP01_1031700_3	0
AMRU_Ao_CCCAATCCACGACTCG	AMRU	Ao	8764	PvP01_10_v1_2721_-_PVP01_1031700_3	0.023016
AMRU_Ao_CCCAATCGTCAATGTC	AMRU	Ao	2996	PvP01_10_v1_2721_-_PVP01_1031700_3	0
AMRU_Ao_CCCAATCGTTCCTCCA	AMRU	Ao	3497	PvP01_10_v1_2721_-_PVP01_1031700_3	0
AMRU_Ao_CCCAATCTCCGCGCAA	AMRU	Ao	4464	PvP01_10_v1_2721_-_PVP01_1031700_3	0
AMRU_Ao_CCCAATCTCTACCTGC	AMRU	Ao	6045	PvP01_10_v1_2721_-_PVP01_1031700_3	0.0569541
AMRU_Ao_CCCATACCAGATCTGT	AMRU	Ao	4567	PvP01_10_v1_2721_-_PVP01_1031700_3	0.0616599
AMRU_Ao_CCCATACCAGCCTTGG	AMRU	Ao	7534	PvP01_10_v1_2721_-_PVP01_1031700_3	0
AMRU_Ao_CCCATACGTAGGACAC	AMRU	Ao	20	PvP01_10_v1_2721_-_PVP01_1031700_3	0
AMRU_Ao_CCCATACTCTGAAAGA	AMRU	Ao	5039	PvP01_10_v1_2721_-_PVP01_1031700_3	0
AMRU_Ao_CCCATACTCTTGTTTG	AMRU	Ao	4641	PvP01_10_v1_2721_-_PVP01_1031700_3	0.0528905
AMRU_Ao_CCCTCCTTCAAGAAGT	AMRU	Ao	6898	PvP01_10_v1_2721_-_PVP01_1031700_3	0
AMRU_Ao_CCCTCCTTCGGAAACG	AMRU	Ao	7984	PvP01_10_v1_2721_-_PVP01_1031700_3	0
AMRU_Ao_CCCTCCTTCTATCCTA	AMRU	Ao	5559	PvP01_10_v1_2721_-_PVP01_1031700_3	0.0783546
AMRU_Ao_CCCTCCTTCTCAAACG	AMRU	Ao	3214	PvP01_10_v1_2721_-_PVP01_1031700_3	0.0352783
AMRU_Ao_CCCTCCTTCTTATCTG	AMRU	Ao	6255	PvP01_10_v1_2721_-_PVP01_1031700_3	0
AMRU_Ao_CCGGGATAGCGTTCCG	AMRU	Ao	7612	PvP01_10_v1_2721_-_PVP01_1031700_3	0
AMRU_Ao_CCGGGATAGTACGCCC	AMRU	Ao	2033	PvP01_10_v1_2721_-_PVP01_1031700_3	0
AMRU_Ao_CCGGGATCAACTTGAC	AMRU	Ao	6240	PvP01_10_v1_2721_-_PVP01_1031700_3	0.0931185
AMRU_Ao_CCGGGATCAGCCTTGG	AMRU	Ao	5615	PvP01_10_v1_2721_-_PVP01_1031700_3	0
AMRU_Ao_CCGGGATCATAAGACA	AMRU	Ao	3823	PvP01_10_v1_2721_-_PVP01_1031700_3	0
AMRU_Ao_CCGGGATGTTCGAATC	AMRU	Ao	3318	PvP01_10_v1_2721_-_PVP01_1031700_3	0
AMRU_Ao_CCGGGATTCATAAAGG	AMRU	Ao	2830	PvP01_10_v1_2721_-_PVP01_1031700_3	0
AMRU_Ao_CCGGGATTCCATGAAC	AMRU	Ao	707	PvP01_10_v1_2721_-_PVP01_1031700_3	0
AMRU_Ao_CCGGGATTCTTGTCAT	AMRU	Ao	382	PvP01_10_v1_2721_-_PVP01_1031700_3	0
AMRU_Ao_CCGGTAGTCTTTCCTC	AMRU	Ao	8738	PvP01_10_v1_2721_-_PVP01_1031700_3	0
AMRU_Ao_CCGTACTCAGTGGGAT	AMRU	Ao	6	PvP01_10_v1_2721_-_PVP01_1031700_3	0
AMRU_Ao_CCGTACTCATACAGCT	AMRU	Ao	2459	PvP01_10_v1_2721_-_PVP01_1031700_3	0
AMRU_Ao_CCGTACTGTGAAATCA	AMRU	Ao	8319	PvP01_10_v1_2721_-_PVP01_1031700_3	0
AMRU_Ao_CCGTGGAAGCGTTTAC	AMRU	Ao	5469	PvP01_10_v1_2721_-_PVP01_1031700_3	0
AMRU_Ao_CCGTGGAAGCTGAACG	AMRU	Ao	2908	PvP01_10_v1_2721_-_PVP01_1031700_3	0
AMRU_Ao_CCGTGGAAGTCACGCC	AMRU	Ao	4561	PvP01_10_v1_2721_-_PVP01_1031700_3	0
AMRU_Ao_CCGTGGACAGACAAGC	AMRU	Ao	4095	PvP01_10_v1_2721_-_PVP01_1031700_3	0
AMRU_Ao_CCGTGGAGTTGTCTTT	AMRU	Ao	8369	PvP01_10_v1_2721_-_PVP01_1031700_3	0
AMRU_Ao_CCGTGGATCAGTGTTG	AMRU	Ao	5	PvP01_10_v1_2721_-_PVP01_1031700_3	0
AMRU_Ao_CCGTGGATCGCACTCT	AMRU	Ao	8890	PvP01_10_v1_2721_-_PVP01_1031700_3	0
AMRU_Ao_CCGTTCAAGCGTAGTG	AMRU	Ao	2532	PvP01_10_v1_2721_-_PVP01_1031700_3	0
AMRU_Ao_CCGTTCAAGGTCATCT	AMRU	Ao	4756	PvP01_10_v1_2721_-_PVP01_1031700_3	0
AMRU_Ao_CCGTTCAAGGTTACCT	AMRU	Ao	3630	PvP01_10_v1_2721_-_PVP01_1031700_3	0
AMRU_Ao_CCGTTCAGTATCTGCA	AMRU	Ao	7651	PvP01_10_v1_2721_-_PVP01_1031700_3	0
AMRU_Ao_CCGTTCAGTTCCACAA	AMRU	Ao	4481	PvP01_10_v1_2721_-_PVP01_1031700_3	0
AMRU_Ao_CCGTTCATCAGCTGGC	AMRU	Ao	8776	PvP01_10_v1_2721_-_PVP01_1031700_3	0
AMRU_Ao_CCGTTCATCCATGAAC	AMRU	Ao	3387	PvP01_10_v1_2721_-_PVP01_1031700_3	0
AMRU_Ao_CCTAAAGAGAGCCTAG	AMRU	Ao	6140	PvP01_10_v1_2721_-_PVP01_1031700_3	0.0677094
AMRU_Ao_CCTAAAGCACCCTATC	AMRU	Ao	2080	PvP01_10_v1_2721_-_PVP01_1031700_3	0
AMRU_Ao_CCTAAAGCATGGGAAC	AMRU	Ao	660	PvP01_10_v1_2721_-_PVP01_1031700_3	0
AMRU_Ao_CCTACACAGTAATCCC	AMRU	Ao	2180	PvP01_10_v1_2721_-_PVP01_1031700_3	0
AMRU_Ao_CCTACACAGTACGCGA	AMRU	Ao	5191	PvP01_10_v1_2721_-_PVP01_1031700_3	0.0485484
AMRU_Ao_CCTACACTCGAACGGA	AMRU	Ao	3985	PvP01_10_v1_2721_-_PVP01_1031700_3	0
AMRU_Ao_CCTACCAAGAGTAATC	AMRU	Ao	1982	PvP01_10_v1_2721_-_PVP01_1031700_3	0
AMRU_Ao_CCTACCAGTGTGGTTT	AMRU	Ao	3618	PvP01_10_v1_2721_-_PVP01_1031700_3	0
AMRU_Ao_CCTAGCTGTAGGCTGA	AMRU	Ao	3692	PvP01_10_v1_2721_-_PVP01_1031700_3	0.0513136
AMRU_Ao_CCTATTAGTGCAGTAG	AMRU	Ao	7820	PvP01_10_v1_2721_-_PVP01_1031700_3	0
AMRU_Ao_CCTATTATCCAAGTAC	AMRU	Ao	5325	PvP01_10_v1_2721_-_PVP01_1031700_3	0
AMRU_Ao_CCTATTATCGCATGGC	AMRU	Ao	99	PvP01_10_v1_2721_-_PVP01_1031700_3	0
AMRU_Ao_CCTCAGTAGAGAGCTC	AMRU	Ao	2978	PvP01_10_v1_2721_-_PVP01_1031700_3	0
AMRU_Ao_CCTCAGTGTAAGTGTA	AMRU	Ao	4281	PvP01_10_v1_2721_-_PVP01_1031700_3	0
AMRU_Ao_CCTCAGTGTACGCACC	AMRU	Ao	5411	PvP01_10_v1_2721_-_PVP01_1031700_3	0.0354597
AMRU_Ao_CCTCTGAAGCCAGAAC	AMRU	Ao	7858	PvP01_10_v1_2721_-_PVP01_1031700_3	0
AMRU_Ao_CCTCTGAAGTGTCCCG	AMRU	Ao	5827	PvP01_10_v1_2721_-_PVP01_1031700_3	0
AMRU_Ao_CCTCTGAGTCAAGCGA	AMRU	Ao	32	PvP01_10_v1_2721_-_PVP01_1031700_3	0
AMRU_Ao_CCTCTGATCATCGATG	AMRU	Ao	3752	PvP01_10_v1_2721_-_PVP01_1031700_3	0
AMRU_Ao_CCTTACGAGAAGATTC	AMRU	Ao	7972	PvP01_10_v1_2721_-_PVP01_1031700_3	0
AMRU_Ao_CCTTACGCAATACGCT	AMRU	Ao	5485	PvP01_10_v1_2721_-_PVP01_1031700_3	0
AMRU_Ao_CCTTACGGTTATCACG	AMRU	Ao	9071	PvP01_10_v1_2721_-_PVP01_1031700_3	0
AMRU_Ao_CCTTACGTCAGTTAGC	AMRU	Ao	5409	PvP01_10_v1_2721_-_PVP01_1031700_3	0.210881
AMRU_Ao_CCTTACGTCATGTCCC	AMRU	Ao	8478	PvP01_10_v1_2721_-_PVP01_1031700_3	0
AMRU_Ao_CCTTCCCGTGGCCCTA	AMRU	Ao	6269	PvP01_10_v1_2721_-_PVP01_1031700_3	0.0404106
AMRU_Ao_CCTTCGAAGGAGCGTT	AMRU	Ao	8833	PvP01_10_v1_2721_-_PVP01_1031700_3	0
AMRU_Ao_CCTTTCTAGTGTTAGA	AMRU	Ao	5207	PvP01_10_v1_2721_-_PVP01_1031700_3	0
AMRU_Ao_CCTTTCTGTTCCAACA	AMRU	Ao	2507	PvP01_10_v1_2721_-_PVP01_1031700_3	0.0793273
AMRU_Ao_CCTTTCTGTTGATTGC	AMRU	Ao	4455	PvP01_10_v1_2721_-_PVP01_1031700_3	0
AMRU_Ao_CGAACATAGTAGGTGC	AMRU	Ao	2473	PvP01_10_v1_2721_-_PVP01_1031700_3	0
AMRU_Ao_CGAACATCAAGCCGCT	AMRU	Ao	3295	PvP01_10_v1_2721_-_PVP01_1031700_3	0
AMRU_Ao_CGAACATGTTACCAGT	AMRU	Ao	4306	PvP01_10_v1_2721_-_PVP01_1031700_3	0
AMRU_Ao_CGAACATTCTGTCTCG	AMRU	Ao	733	PvP01_10_v1_2721_-_PVP01_1031700_3	0
AMRU_Ao_CGAATGTCAGTAAGCG	AMRU	Ao	5142	PvP01_10_v1_2721_-_PVP01_1031700_3	0
AMRU_Ao_CGAATGTGTCGAAAGC	AMRU	Ao	4301	PvP01_10_v1_2721_-_PVP01_1031700_3	0
AMRU_Ao_CGAATGTTCGAGGTAG	AMRU	Ao	5383	PvP01_10_v1_2721_-_PVP01_1031700_3	0.0969227
AMRU_Ao_CGACCTTAGAAGGGTA	AMRU	Ao	6342	PvP01_10_v1_2721_-_PVP01_1031700_3	0
AMRU_Ao_CGACCTTAGGACAGAA	AMRU	Ao	8020	PvP01_10_v1_2721_-_PVP01_1031700_3	0
AMRU_Ao_CGACCTTGTCAACATC	AMRU	Ao	105	PvP01_10_v1_2721_-_PVP01_1031700_3	0
AMRU_Ao_CGACCTTGTCCAACTA	AMRU	Ao	8908	PvP01_10_v1_2721_-_PVP01_1031700_3	0
AMRU_Ao_CGACCTTGTGTAATGA	AMRU	Ao	2562	PvP01_10_v1_2721_-_PVP01_1031700_3	0
AMRU_Ao_CGAGAAGCAAGCCGTC	AMRU	Ao	3094	PvP01_10_v1_2721_-_PVP01_1031700_3	0
AMRU_Ao_CGAGAAGCAATCGAAA	AMRU	Ao	5823	PvP01_10_v1_2721_-_PVP01_1031700_3	0
AMRU_Ao_CGAGCACCACAACGTT	AMRU	Ao	6125	PvP01_10_v1_2721_-_PVP01_1031700_3	0
AMRU_Ao_CGAGCACTCCATGAGT	AMRU	Ao	1334	PvP01_10_v1_2721_-_PVP01_1031700_3	0
AMRU_Ao_CGAGCACTCTCGCATC	AMRU	Ao	8775	PvP01_10_v1_2721_-_PVP01_1031700_3	0.0265407
AMRU_Ao_CGAGCCAAGAGACGAA	AMRU	Ao	4097	PvP01_10_v1_2721_-_PVP01_1031700_3	0
AMRU_Ao_CGAGCCAAGGGAGTAA	AMRU	Ao	1494	PvP01_10_v1_2721_-_PVP01_1031700_3	0
AMRU_Ao_CGAGCCACAAGAAAGG	AMRU	Ao	3996	PvP01_10_v1_2721_-_PVP01_1031700_3	0
AMRU_Ao_CGAGCCAGTTGTGGCC	AMRU	Ao	5382	PvP01_10_v1_2721_-_PVP01_1031700_3	0
AMRU_Ao_CGAGCCATCTACCAGA	AMRU	Ao	2488	PvP01_10_v1_2721_-_PVP01_1031700_3	0
AMRU_Ao_CGATCGGCAAGCCTAT	AMRU	Ao	3069	PvP01_10_v1_2721_-_PVP01_1031700_3	0
AMRU_Ao_CGATCGGGTAGCGATG	AMRU	Ao	6103	PvP01_10_v1_2721_-_PVP01_1031700_3	0.0963438
AMRU_Ao_CGATCGGGTGTAACGG	AMRU	Ao	8601	PvP01_10_v1_2721_-_PVP01_1031700_3	0
AMRU_Ao_CGATCGGTCATTCACT	AMRU	Ao	3654	PvP01_10_v1_2721_-_PVP01_1031700_3	0
AMRU_Ao_CGATCGGTCCAGTAGT	AMRU	Ao	6967	PvP01_10_v1_2721_-_PVP01_1031700_3	0.0598838
AMRU_Ao_CGATGGCAGACCGGAT	AMRU	Ao	4033	PvP01_10_v1_2721_-_PVP01_1031700_3	0.129032
AMRU_Ao_CGATGGCAGATACACA	AMRU	Ao	8618	PvP01_10_v1_2721_-_PVP01_1031700_3	0
AMRU_Ao_CGATGGCCACAACGCC	AMRU	Ao	2015	PvP01_10_v1_2721_-_PVP01_1031700_3	0
AMRU_Ao_CGATGGCCAGGGTATG	AMRU	Ao	244	PvP01_10_v1_2721_-_PVP01_1031700_3	0
AMRU_Ao_CGATGGCCAGTCTTCC	AMRU	Ao	2414	PvP01_10_v1_2721_-_PVP01_1031700_3	0
AMRU_Ao_CGATGGCTCAGGTAAA	AMRU	Ao	7038	PvP01_10_v1_2721_-_PVP01_1031700_3	0
AMRU_Ao_CGATGGCTCATTTGGG	AMRU	Ao	4155	PvP01_10_v1_2721_-_PVP01_1031700_3	0
AMRU_Ao_CGATGTAAGGAGCGTT	AMRU	Ao	3487	PvP01_10_v1_2721_-_PVP01_1031700_3	0
AMRU_Ao_CGATGTACAGGAATGC	AMRU	Ao	4723	PvP01_10_v1_2721_-_PVP01_1031700_3	0
AMRU_Ao_CGATGTACAGGATTGG	AMRU	Ao	3162	PvP01_10_v1_2721_-_PVP01_1031700_3	0
AMRU_Ao_CGATGTATCGGTTCGG	AMRU	Ao	8447	PvP01_10_v1_2721_-_PVP01_1031700_3	0
AMRU_Ao_CGATTGAAGAAAGTGG	AMRU	Ao	427	PvP01_10_v1_2721_-_PVP01_1031700_3	0
AMRU_Ao_CGATTGAAGGCGCTCT	AMRU	Ao	8622	PvP01_10_v1_2721_-_PVP01_1031700_3	0
AMRU_Ao_CGATTGAAGTGAACGC	AMRU	Ao	2999	PvP01_10_v1_2721_-_PVP01_1031700_3	0
AMRU_Ao_CGATTGATCGAATGGG	AMRU	Ao	2425	PvP01_10_v1_2721_-_PVP01_1031700_3	0
AMRU_Ao_CGATTGATCGCCATAA	AMRU	Ao	3034	PvP01_10_v1_2721_-_PVP01_1031700_3	0
AMRU_Ao_CGCCAAGAGCGCCTTG	AMRU	Ao	8099	PvP01_10_v1_2721_-_PVP01_1031700_3	0
AMRU_Ao_CGCGGTAAGGGCATGT	AMRU	Ao	8757	PvP01_10_v1_2721_-_PVP01_1031700_3	0
AMRU_Ao_CGCGGTAAGTACGCGA	AMRU	Ao	8198	PvP01_10_v1_2721_-_PVP01_1031700_3	0
AMRU_Ao_CGCGGTAGTCGCCATG	AMRU	Ao	3953	PvP01_10_v1_2721_-_PVP01_1031700_3	0
AMRU_Ao_CGCGGTAGTTCACCTC	AMRU	Ao	3684	PvP01_10_v1_2721_-_PVP01_1031700_3	0.088269
AMRU_Ao_CGCGTTTCACGAAATA	AMRU	Ao	4923	PvP01_10_v1_2721_-_PVP01_1031700_3	0
AMRU_Ao_CGCGTTTCAGTTTACG	AMRU	Ao	8710	PvP01_10_v1_2721_-_PVP01_1031700_3	0
AMRU_Ao_CGCTATCAGCAGACTG	AMRU	Ao	2915	PvP01_10_v1_2721_-_PVP01_1031700_3	0
AMRU_Ao_CGCTATCCAACCGCCA	AMRU	Ao	6966	PvP01_10_v1_2721_-_PVP01_1031700_3	0
AMRU_Ao_CGCTATCGTACATCCA	AMRU	Ao	5288	PvP01_10_v1_2721_-_PVP01_1031700_3	0.0387207
AMRU_Ao_CGCTGGAAGGCTAGGT	AMRU	Ao	740	PvP01_10_v1_2721_-_PVP01_1031700_3	0
AMRU_Ao_CGCTGGACAGCTGGCT	AMRU	Ao	4201	PvP01_10_v1_2721_-_PVP01_1031700_3	0
AMRU_Ao_CGCTGGATCTAGAGTC	AMRU	Ao	8235	PvP01_10_v1_2721_-_PVP01_1031700_3	0.0247225
AMRU_Ao_CGCTTCACAGCGATCC	AMRU	Ao	4090	PvP01_10_v1_2721_-_PVP01_1031700_3	0
AMRU_Ao_CGCTTCAGTCAACTGT	AMRU	Ao	5353	PvP01_10_v1_2721_-_PVP01_1031700_3	0
AMRU_Ao_CGCTTCAGTCACAAGG	AMRU	Ao	1308	PvP01_10_v1_2721_-_PVP01_1031700_3	0
AMRU_Ao_CGCTTCATCCGCTGTT	AMRU	Ao	2318	PvP01_10_v1_2721_-_PVP01_1031700_3	0
AMRU_Ao_CGGACACAGACAGGCT	AMRU	Ao	7184	PvP01_10_v1_2721_-_PVP01_1031700_3	0
AMRU_Ao_CGGACACGTTCCACGG	AMRU	Ao	2373	PvP01_10_v1_2721_-_PVP01_1031700_3	0
AMRU_Ao_CGGACACGTTTAAGCC	AMRU	Ao	4513	PvP01_10_v1_2721_-_PVP01_1031700_3	0
AMRU_Ao_CGGACACTCTTGCAAG	AMRU	Ao	8893	PvP01_10_v1_2721_-_PVP01_1031700_3	0
AMRU_Ao_CGGACGTGTGCACGAA	AMRU	Ao	4142	PvP01_10_v1_2721_-_PVP01_1031700_3	0
AMRU_Ao_CGGACGTGTGCGGTAA	AMRU	Ao	4389	PvP01_10_v1_2721_-_PVP01_1031700_3	0
AMRU_Ao_CGGAGCTAGTATTGGA	AMRU	Ao	5047	PvP01_10_v1_2721_-_PVP01_1031700_3	0
AMRU_Ao_CGGAGCTGTAAATGTG	AMRU	Ao	4147	PvP01_10_v1_2721_-_PVP01_1031700_3	0
AMRU_Ao_CGGAGCTGTCTCGTTC	AMRU	Ao	8040	PvP01_10_v1_2721_-_PVP01_1031700_3	0
AMRU_Ao_CGGAGCTGTGAAAGAG	AMRU	Ao	3908	PvP01_10_v1_2721_-_PVP01_1031700_3	0.0413582
AMRU_Ao_CGGAGCTTCATCATTC	AMRU	Ao	4077	PvP01_10_v1_2721_-_PVP01_1031700_3	0
AMRU_Ao_CGGAGCTTCTCTGTCG	AMRU	Ao	8652	PvP01_10_v1_2721_-_PVP01_1031700_3	0
AMRU_Ao_CGGCTAGAGAGTAAGG	AMRU	Ao	1636	PvP01_10_v1_2721_-_PVP01_1031700_3	0
AMRU_Ao_CGGCTAGAGTATCGAA	AMRU	Ao	1393	PvP01_10_v1_2721_-_PVP01_1031700_3	0
AMRU_Ao_CGGCTAGGTATGAATG	AMRU	Ao	8870	PvP01_10_v1_2721_-_PVP01_1031700_3	0
AMRU_Ao_CGGGTCAAGGTTCCTA	AMRU	Ao	8968	PvP01_10_v1_2721_-_PVP01_1031700_3	0
AMRU_Ao_CGGGTCAAGTGTACGG	AMRU	Ao	2668	PvP01_10_v1_2721_-_PVP01_1031700_3	0
AMRU_Ao_CGGGTCACAACCGCCA	AMRU	Ao	3598	PvP01_10_v1_2721_-_PVP01_1031700_3	0
AMRU_Ao_CGGGTCACAACTTGAC	AMRU	Ao	838	PvP01_10_v1_2721_-_PVP01_1031700_3	0
AMRU_Ao_CGGGTCACAGTGGGAT	AMRU	Ao	3746	PvP01_10_v1_2721_-_PVP01_1031700_3	0
AMRU_Ao_CGGGTCAGTTAGATGA	AMRU	Ao	2867	PvP01_10_v1_2721_-_PVP01_1031700_3	0
AMRU_Ao_CGTAGCGAGGTGCACA	AMRU	Ao	4554	PvP01_10_v1_2721_-_PVP01_1031700_3	0
AMRU_Ao_CGTAGCGAGTACCGGA	AMRU	Ao	5327	PvP01_10_v1_2721_-_PVP01_1031700_3	0
AMRU_Ao_CGTAGCGCAATCGAAA	AMRU	Ao	6779	PvP01_10_v1_2721_-_PVP01_1031700_3	0
AMRU_Ao_CGTAGCGTCACCACCT	AMRU	Ao	8393	PvP01_10_v1_2721_-_PVP01_1031700_3	0
AMRU_Ao_CGTAGCGTCCACGTTC	AMRU	Ao	4555	PvP01_10_v1_2721_-_PVP01_1031700_3	0
AMRU_Ao_CGTAGCGTCCATGAAC	AMRU	Ao	4253	PvP01_10_v1_2721_-_PVP01_1031700_3	0
AMRU_Ao_CGTAGCGTCCCGGATG	AMRU	Ao	8243	PvP01_10_v1_2721_-_PVP01_1031700_3	0.0205825
AMRU_Ao_CGTAGCGTCGGATGGA	AMRU	Ao	5074	PvP01_10_v1_2721_-_PVP01_1031700_3	0.168962
AMRU_Ao_CGTAGGCAGACCTTTG	AMRU	Ao	3305	PvP01_10_v1_2721_-_PVP01_1031700_3	0
AMRU_Ao_CGTAGGCCAGGATTGG	AMRU	Ao	4453	PvP01_10_v1_2721_-_PVP01_1031700_3	0
AMRU_Ao_CGTCACTCAGGCTCAC	AMRU	Ao	5330	PvP01_10_v1_2721_-_PVP01_1031700_3	0
AMRU_Ao_CGTCACTGTCTGATTG	AMRU	Ao	6537	PvP01_10_v1_2721_-_PVP01_1031700_3	0
AMRU_Ao_CGTCACTGTGCATCTA	AMRU	Ao	4937	PvP01_10_v1_2721_-_PVP01_1031700_3	0
AMRU_Ao_CGTCAGGAGCTAACAA	AMRU	Ao	4536	PvP01_10_v1_2721_-_PVP01_1031700_3	0.096103
AMRU_Ao_CGTCAGGCACGCCAGT	AMRU	Ao	3911	PvP01_10_v1_2721_-_PVP01_1031700_3	0
AMRU_Ao_CGTCAGGCACTGCCAG	AMRU	Ao	8831	PvP01_10_v1_2721_-_PVP01_1031700_3	0
AMRU_Ao_CGTCAGGGTACGAAAT	AMRU	Ao	5834	PvP01_10_v1_2721_-_PVP01_1031700_3	0.0613008
AMRU_Ao_CGTCAGGGTTCGAATC	AMRU	Ao	1916	PvP01_10_v1_2721_-_PVP01_1031700_3	0
AMRU_Ao_CGTCCATAGAACTGTA	AMRU	Ao	4492	PvP01_10_v1_2721_-_PVP01_1031700_3	0
AMRU_Ao_CGTCCATAGGTGCACA	AMRU	Ao	5466	PvP01_10_v1_2721_-_PVP01_1031700_3	0
AMRU_Ao_CGTCCATCAAGTTAAG	AMRU	Ao	3965	PvP01_10_v1_2721_-_PVP01_1031700_3	0
AMRU_Ao_CGTCCATGTGTTTGGT	AMRU	Ao	3772	PvP01_10_v1_2721_-_PVP01_1031700_3	0
AMRU_Ao_CGTCTACAGAGTAAGG	AMRU	Ao	4883	PvP01_10_v1_2721_-_PVP01_1031700_3	0.0479846
AMRU_Ao_CGTCTACCAAGCGAGT	AMRU	Ao	1907	PvP01_10_v1_2721_-_PVP01_1031700_3	0
AMRU_Ao_CGTGAGCAGTCTCGGC	AMRU	Ao	8524	PvP01_10_v1_2721_-_PVP01_1031700_3	0
AMRU_Ao_CGTGAGCAGTGCGTGA	AMRU	Ao	2223	PvP01_10_v1_2721_-_PVP01_1031700_3	0
AMRU_Ao_CGTGAGCGTATCTGCA	AMRU	Ao	2870	PvP01_10_v1_2721_-_PVP01_1031700_3	0.0498927
AMRU_Ao_CGTGAGCGTGCATCTA	AMRU	Ao	72	PvP01_10_v1_2721_-_PVP01_1031700_3	0
AMRU_Ao_CGTGAGCTCCTTGCCA	AMRU	Ao	4290	PvP01_10_v1_2721_-_PVP01_1031700_3	0
AMRU_Ao_CGTGTAAAGTGCCAGA	AMRU	Ao	6183	PvP01_10_v1_2721_-_PVP01_1031700_3	0.183301
AMRU_Ao_CGTGTAAGTCAGAATA	AMRU	Ao	4727	PvP01_10_v1_2721_-_PVP01_1031700_3	0
AMRU_Ao_CGTGTCTTCCAAATGC	AMRU	Ao	4820	PvP01_10_v1_2721_-_PVP01_1031700_3	0.113282
AMRU_Ao_CGTTAGAAGGACGAAA	AMRU	Ao	4124	PvP01_10_v1_2721_-_PVP01_1031700_3	0
AMRU_Ao_CGTTAGATCACCATAG	AMRU	Ao	2913	PvP01_10_v1_2721_-_PVP01_1031700_3	0
AMRU_Ao_CGTTCTGCAGTACACT	AMRU	Ao	8867	PvP01_10_v1_2721_-_PVP01_1031700_3	0
AMRU_Ao_CGTTGGGCACTTAAGC	AMRU	Ao	4963	PvP01_10_v1_2721_-_PVP01_1031700_3	0
AMRU_Ao_CGTTGGGGTCCCGACA	AMRU	Ao	8193	PvP01_10_v1_2721_-_PVP01_1031700_3	0
AMRU_Ao_CGTTGGGTCACCGGGT	AMRU	Ao	8902	PvP01_10_v1_2721_-_PVP01_1031700_3	0
AMRU_Ao_CTAACTTCAAACAACA	AMRU	Ao	4261	PvP01_10_v1_2721_-_PVP01_1031700_3	0
AMRU_Ao_CTAACTTCACGTCTCT	AMRU	Ao	8162	PvP01_10_v1_2721_-_PVP01_1031700_3	0
AMRU_Ao_CTAACTTCACTTCTGC	AMRU	Ao	1877	PvP01_10_v1_2721_-_PVP01_1031700_3	0
AMRU_Ao_CTAAGACGTAGGCTGA	AMRU	Ao	8765	PvP01_10_v1_2721_-_PVP01_1031700_3	0.0316006
AMRU_Ao_CTAATGGAGATATGCA	AMRU	Ao	7803	PvP01_10_v1_2721_-_PVP01_1031700_3	0
AMRU_Ao_CTAATGGCAGATGGCA	AMRU	Ao	8662	PvP01_10_v1_2721_-_PVP01_1031700_3	0
AMRU_Ao_CTAATGGCAGGGTTAG	AMRU	Ao	2442	PvP01_10_v1_2721_-_PVP01_1031700_3	0
AMRU_Ao_CTAATGGGTAGCTCCG	AMRU	Ao	7809	PvP01_10_v1_2721_-_PVP01_1031700_3	0
AMRU_Ao_CTAATGGTCTCTTATG	AMRU	Ao	8847	PvP01_10_v1_2721_-_PVP01_1031700_3	0
AMRU_Ao_CTACACCCACCGAATT	AMRU	Ao	3594	PvP01_10_v1_2721_-_PVP01_1031700_3	0
AMRU_Ao_CTACACCCACTATCTT	AMRU	Ao	3792	PvP01_10_v1_2721_-_PVP01_1031700_3	0
AMRU_Ao_CTACATTAGTGCCAGA	AMRU	Ao	4028	PvP01_10_v1_2721_-_PVP01_1031700_3	0
AMRU_Ao_CTACATTCAAGCCTAT	AMRU	Ao	2757	PvP01_10_v1_2721_-_PVP01_1031700_3	0
AMRU_Ao_CTACATTCACAGTCGC	AMRU	Ao	3879	PvP01_10_v1_2721_-_PVP01_1031700_3	0.0646747
AMRU_Ao_CTACATTGTCTGATTG	AMRU	Ao	6271	PvP01_10_v1_2721_-_PVP01_1031700_3	0
AMRU_Ao_CTACATTTCACCTCGT	AMRU	Ao	8825	PvP01_10_v1_2721_-_PVP01_1031700_3	0
AMRU_Ao_CTACATTTCAGCTGGC	AMRU	Ao	3095	PvP01_10_v1_2721_-_PVP01_1031700_3	0
AMRU_Ao_CTACCCAAGATGAGAG	AMRU	Ao	2097	PvP01_10_v1_2721_-_PVP01_1031700_3	0
AMRU_Ao_CTACCCACAAGACACG	AMRU	Ao	3905	PvP01_10_v1_2721_-_PVP01_1031700_3	0
AMRU_Ao_CTACCCATCACCAGGC	AMRU	Ao	7351	PvP01_10_v1_2721_-_PVP01_1031700_3	0
AMRU_Ao_CTACCCATCATTCACT	AMRU	Ao	3759	PvP01_10_v1_2721_-_PVP01_1031700_3	0
AMRU_Ao_CTACGTCAGTTATCGC	AMRU	Ao	7094	PvP01_10_v1_2721_-_PVP01_1031700_3	0
AMRU_Ao_CTACGTCCACAACTGT	AMRU	Ao	4918	PvP01_10_v1_2721_-_PVP01_1031700_3	0
AMRU_Ao_CTACGTCGTTCAGCGC	AMRU	Ao	8177	PvP01_10_v1_2721_-_PVP01_1031700_3	0
AMRU_Ao_CTACGTCGTTGCCTCT	AMRU	Ao	1545	PvP01_10_v1_2721_-_PVP01_1031700_3	0
AMRU_Ao_CTACGTCTCGTAGGTT	AMRU	Ao	3717	PvP01_10_v1_2721_-_PVP01_1031700_3	0
AMRU_Ao_CTAGAGTGTCCGTGAC	AMRU	Ao	7354	PvP01_10_v1_2721_-_PVP01_1031700_3	0
AMRU_Ao_CTAGCCTAGCCAGTAG	AMRU	Ao	3824	PvP01_10_v1_2721_-_PVP01_1031700_3	0.0531152
AMRU_Ao_CTAGCCTAGTACCGGA	AMRU	Ao	7816	PvP01_10_v1_2721_-_PVP01_1031700_3	0
AMRU_Ao_CTAGCCTCAGCGTTCG	AMRU	Ao	5557	PvP01_10_v1_2721_-_PVP01_1031700_3	0
AMRU_Ao_CTAGCCTTCTTGTATC	AMRU	Ao	200	PvP01_10_v1_2721_-_PVP01_1031700_3	0
AMRU_Ao_CTAGTGAAGAGAGCTC	AMRU	Ao	4217	PvP01_10_v1_2721_-_PVP01_1031700_3	0
AMRU_Ao_CTAGTGAAGATGCCTT	AMRU	Ao	4143	PvP01_10_v1_2721_-_PVP01_1031700_3	0.107562
AMRU_Ao_CTAGTGACAGCTGTAT	AMRU	Ao	3428	PvP01_10_v1_2721_-_PVP01_1031700_3	0
AMRU_Ao_CTAGTGATCACTGGGC	AMRU	Ao	2583	PvP01_10_v1_2721_-_PVP01_1031700_3	0
AMRU_Ao_CTAGTGATCTGTCCGT	AMRU	Ao	4419	PvP01_10_v1_2721_-_PVP01_1031700_3	0
AMRU_Ao_CTCACACCAGCCTATA	AMRU	Ao	3748	PvP01_10_v1_2721_-_PVP01_1031700_3	0.0534331
AMRU_Ao_CTCAGAAAGAGGGCTT	AMRU	Ao	8315	PvP01_10_v1_2721_-_PVP01_1031700_3	0
AMRU_Ao_CTCAGAAAGGTGCAAC	AMRU	Ao	8811	PvP01_10_v1_2721_-_PVP01_1031700_3	0
AMRU_Ao_CTCAGAACAACGATCT	AMRU	Ao	3324	PvP01_10_v1_2721_-_PVP01_1031700_3	0
AMRU_Ao_CTCAGAACATCTCCCA	AMRU	Ao	8236	PvP01_10_v1_2721_-_PVP01_1031700_3	0
AMRU_Ao_CTCAGAACATCTCGCT	AMRU	Ao	3640	PvP01_10_v1_2721_-_PVP01_1031700_3	0.0416077
AMRU_Ao_CTCAGAAGTAAGTTCC	AMRU	Ao	3894	PvP01_10_v1_2721_-_PVP01_1031700_3	0.050888
AMRU_Ao_CTCAGAAGTAGCGTCC	AMRU	Ao	9163	PvP01_10_v1_2721_-_PVP01_1031700_3	0
AMRU_Ao_CTCAGAAGTGAGTGAC	AMRU	Ao	2443	PvP01_10_v1_2721_-_PVP01_1031700_3	0
AMRU_Ao_CTCATTACAACGATCT	AMRU	Ao	6127	PvP01_10_v1_2721_-_PVP01_1031700_3	0.0947508
AMRU_Ao_CTCATTACAGTTCATG	AMRU	Ao	8658	PvP01_10_v1_2721_-_PVP01_1031700_3	0.0230431
AMRU_Ao_CTCATTAGTACAGACG	AMRU	Ao	3912	PvP01_10_v1_2721_-_PVP01_1031700_3	0
AMRU_Ao_CTCATTATCCGCGTTT	AMRU	Ao	3311	PvP01_10_v1_2721_-_PVP01_1031700_3	0
AMRU_Ao_CTCATTATCGGAAATA	AMRU	Ao	1272	PvP01_10_v1_2721_-_PVP01_1031700_3	0
AMRU_Ao_CTCCTAGCAAATACAG	AMRU	Ao	8022	PvP01_10_v1_2721_-_PVP01_1031700_3	0
AMRU_Ao_CTCCTAGGTCCGAACC	AMRU	Ao	3926	PvP01_10_v1_2721_-_PVP01_1031700_3	0.042735
AMRU_Ao_CTCCTAGTCACTTCAT	AMRU	Ao	8579	PvP01_10_v1_2721_-_PVP01_1031700_3	0
AMRU_Ao_CTCCTAGTCGTTGACA	AMRU	Ao	5326	PvP01_10_v1_2721_-_PVP01_1031700_3	0.0392265
AMRU_Ao_CTCGAAACAATGTAAG	AMRU	Ao	8330	PvP01_10_v1_2721_-_PVP01_1031700_3	0
AMRU_Ao_CTCGAAACACAGTCGC	AMRU	Ao	5507	PvP01_10_v1_2721_-_PVP01_1031700_3	0.0364684
AMRU_Ao_CTCGAAATCGATCCCT	AMRU	Ao	2993	PvP01_10_v1_2721_-_PVP01_1031700_3	0
AMRU_Ao_CTCGAGGGTGAACCTT	AMRU	Ao	6655	PvP01_10_v1_2721_-_PVP01_1031700_3	0
AMRU_Ao_CTCGAGGGTTGGAGGT	AMRU	Ao	3685	PvP01_10_v1_2721_-_PVP01_1031700_3	0
AMRU_Ao_CTCGAGGTCAGTTAGC	AMRU	Ao	1455	PvP01_10_v1_2721_-_PVP01_1031700_3	0
AMRU_Ao_CTCGGAGAGGCAATTA	AMRU	Ao	5919	PvP01_10_v1_2721_-_PVP01_1031700_3	0
AMRU_Ao_CTCGGAGGTAGCGCTC	AMRU	Ao	2301	PvP01_10_v1_2721_-_PVP01_1031700_3	0
AMRU_Ao_CTCGGAGGTTTGGGCC	AMRU	Ao	5393	PvP01_10_v1_2721_-_PVP01_1031700_3	0.0961677
AMRU_Ao_CTCGGGATCGCGGATC	AMRU	Ao	7219	PvP01_10_v1_2721_-_PVP01_1031700_3	0
AMRU_Ao_CTCGTACAGGGAAACA	AMRU	Ao	8490	PvP01_10_v1_2721_-_PVP01_1031700_3	0
AMRU_Ao_CTCGTACCACAACGCC	AMRU	Ao	1486	PvP01_10_v1_2721_-_PVP01_1031700_3	0
AMRU_Ao_CTCGTCAGTTCGGGCT	AMRU	Ao	3448	PvP01_10_v1_2721_-_PVP01_1031700_3	0
AMRU_Ao_CTCGTCATCCTCTAGC	AMRU	Ao	3633	PvP01_10_v1_2721_-_PVP01_1031700_3	0
AMRU_Ao_CTCGTCATCGCTAGCG	AMRU	Ao	4278	PvP01_10_v1_2721_-_PVP01_1031700_3	0
AMRU_Ao_CTCTAATAGCAATATG	AMRU	Ao	9064	PvP01_10_v1_2721_-_PVP01_1031700_3	0
AMRU_Ao_CTCTAATAGTAGCGGT	AMRU	Ao	5803	PvP01_10_v1_2721_-_PVP01_1031700_3	0
AMRU_Ao_CTCTAATGTCCAGTAT	AMRU	Ao	8866	PvP01_10_v1_2721_-_PVP01_1031700_3	0
AMRU_Ao_CTCTACGAGACTGTAA	AMRU	Ao	19	PvP01_10_v1_2721_-_PVP01_1031700_3	0
AMRU_Ao_CTCTACGCAAAGGCGT	AMRU	Ao	215	PvP01_10_v1_2721_-_PVP01_1031700_3	0
AMRU_Ao_CTCTACGCAATGTTGC	AMRU	Ao	3918	PvP01_10_v1_2721_-_PVP01_1031700_3	0
AMRU_Ao_CTCTACGGTAGGCATG	AMRU	Ao	3615	PvP01_10_v1_2721_-_PVP01_1031700_3	0
AMRU_Ao_CTCTGGTCAGTGGGAT	AMRU	Ao	4993	PvP01_10_v1_2721_-_PVP01_1031700_3	0.0497587
AMRU_Ao_CTGAAACAGTCATCCA	AMRU	Ao	16	PvP01_10_v1_2721_-_PVP01_1031700_3	0
AMRU_Ao_CTGAAACAGTTAACGA	AMRU	Ao	2729	PvP01_10_v1_2721_-_PVP01_1031700_3	0
AMRU_Ao_CTGAAACCACGAAGCA	AMRU	Ao	4595	PvP01_10_v1_2721_-_PVP01_1031700_3	0
AMRU_Ao_CTGAAACCAGCTGTGC	AMRU	Ao	3329	PvP01_10_v1_2721_-_PVP01_1031700_3	0
AMRU_Ao_CTGAAACCAGTCGATT	AMRU	Ao	4196	PvP01_10_v1_2721_-_PVP01_1031700_3	0
AMRU_Ao_CTGAAACGTCAGATAA	AMRU	Ao	5775	PvP01_10_v1_2721_-_PVP01_1031700_3	0.0784929
AMRU_Ao_CTGAAACTCGGGAGTA	AMRU	Ao	3506	PvP01_10_v1_2721_-_PVP01_1031700_3	0
AMRU_Ao_CTGAAGTCACACCGAC	AMRU	Ao	4219	PvP01_10_v1_2721_-_PVP01_1031700_3	0
AMRU_Ao_CTGAAGTCACAGCCCA	AMRU	Ao	4658	PvP01_10_v1_2721_-_PVP01_1031700_3	0
AMRU_Ao_CTGAAGTTCACTGGGC	AMRU	Ao	6278	PvP01_10_v1_2721_-_PVP01_1031700_3	0.0948722
AMRU_Ao_CTGATAGAGATATGCA	AMRU	Ao	4460	PvP01_10_v1_2721_-_PVP01_1031700_3	0
AMRU_Ao_CTGATAGAGCTCCTTC	AMRU	Ao	6000	PvP01_10_v1_2721_-_PVP01_1031700_3	0
AMRU_Ao_CTGATAGGTACGCACC	AMRU	Ao	5581	PvP01_10_v1_2721_-_PVP01_1031700_3	0.0320349
AMRU_Ao_CTGATAGGTATTCGTG	AMRU	Ao	5097	PvP01_10_v1_2721_-_PVP01_1031700_3	0
AMRU_Ao_CTGATCCGTAACGACG	AMRU	Ao	5788	PvP01_10_v1_2721_-_PVP01_1031700_3	0
AMRU_Ao_CTGATCCGTACGCTGC	AMRU	Ao	8551	PvP01_10_v1_2721_-_PVP01_1031700_3	0
AMRU_Ao_CTGATCCGTTGAACTC	AMRU	Ao	3499	PvP01_10_v1_2721_-_PVP01_1031700_3	0
AMRU_Ao_CTGATCCTCTGCTGTC	AMRU	Ao	6405	PvP01_10_v1_2721_-_PVP01_1031700_3	0.11241
AMRU_Ao_CTGCCTAAGCACCGCT	AMRU	Ao	2899	PvP01_10_v1_2721_-_PVP01_1031700_3	0
AMRU_Ao_CTGCCTAAGCTGCAAG	AMRU	Ao	4265	PvP01_10_v1_2721_-_PVP01_1031700_3	0
AMRU_Ao_CTGCCTACAGGCTGAA	AMRU	Ao	3653	PvP01_10_v1_2721_-_PVP01_1031700_3	0.0443794
AMRU_Ao_CTGCGGAAGAATTCCC	AMRU	Ao	3922	PvP01_10_v1_2721_-_PVP01_1031700_3	0
AMRU_Ao_CTGCTGTGTATAGGGC	AMRU	Ao	3476	PvP01_10_v1_2721_-_PVP01_1031700_3	0
AMRU_Ao_CTGCTGTGTATGGTTC	AMRU	Ao	8591	PvP01_10_v1_2721_-_PVP01_1031700_3	0
AMRU_Ao_CTGCTGTTCGTGGACC	AMRU	Ao	8574	PvP01_10_v1_2721_-_PVP01_1031700_3	0
AMRU_Ao_CTGGTCTCACCCTATC	AMRU	Ao	4227	PvP01_10_v1_2721_-_PVP01_1031700_3	0
AMRU_Ao_CTGGTCTGTCGTCTTC	AMRU	Ao	2984	PvP01_10_v1_2721_-_PVP01_1031700_3	0
AMRU_Ao_CTGTGCTAGGCACATG	AMRU	Ao	6612	PvP01_10_v1_2721_-_PVP01_1031700_3	0.0473732
AMRU_Ao_CTGTGCTAGTTAAGTG	AMRU	Ao	12	PvP01_10_v1_2721_-_PVP01_1031700_3	0
AMRU_Ao_CTGTGCTGTGGCAAAC	AMRU	Ao	3930	PvP01_10_v1_2721_-_PVP01_1031700_3	0.0598176
AMRU_Ao_CTGTGCTTCGGAGCAA	AMRU	Ao	2577	PvP01_10_v1_2721_-_PVP01_1031700_3	0
AMRU_Ao_CTGTTTAAGTCTCGGC	AMRU	Ao	3451	PvP01_10_v1_2721_-_PVP01_1031700_3	0
AMRU_Ao_CTGTTTACAGCTCCGA	AMRU	Ao	3129	PvP01_10_v1_2721_-_PVP01_1031700_3	0
AMRU_Ao_CTGTTTAGTATGAAAC	AMRU	Ao	5751	PvP01_10_v1_2721_-_PVP01_1031700_3	0
AMRU_Ao_CTGTTTAGTCTAGAGG	AMRU	Ao	3884	PvP01_10_v1_2721_-_PVP01_1031700_3	0
AMRU_Ao_CTGTTTAGTGCCTTGG	AMRU	Ao	3706	PvP01_10_v1_2721_-_PVP01_1031700_3	0
AMRU_Ao_CTGTTTATCCGGGTGT	AMRU	Ao	3523	PvP01_10_v1_2721_-_PVP01_1031700_3	0
AMRU_Ao_CTGTTTATCTGCAGTA	AMRU	Ao	3315	PvP01_10_v1_2721_-_PVP01_1031700_3	0
AMRU_Ao_CTTAACTAGAGCTGGT	AMRU	Ao	1118	PvP01_10_v1_2721_-_PVP01_1031700_3	0
AMRU_Ao_CTTAACTTCACATGCA	AMRU	Ao	8320	PvP01_10_v1_2721_-_PVP01_1031700_3	0
AMRU_Ao_CTTAACTTCTACTATC	AMRU	Ao	6895	PvP01_10_v1_2721_-_PVP01_1031700_3	0.0827061
AMRU_Ao_CTTACCGAGCCGCCTA	AMRU	Ao	1987	PvP01_10_v1_2721_-_PVP01_1031700_3	0
AMRU_Ao_CTTACCGCACTCAGGC	AMRU	Ao	4762	PvP01_10_v1_2721_-_PVP01_1031700_3	0
AMRU_Ao_CTTACCGTCACAATGC	AMRU	Ao	4667	PvP01_10_v1_2721_-_PVP01_1031700_3	0
AMRU_Ao_CTTACCGTCCCTGACT	AMRU	Ao	3731	PvP01_10_v1_2721_-_PVP01_1031700_3	0
AMRU_Ao_CTTAGGATCTTCTGGC	AMRU	Ao	5785	PvP01_10_v1_2721_-_PVP01_1031700_3	0
AMRU_Ao_CTTCTCTGTAGAGCTG	AMRU	Ao	5269	PvP01_10_v1_2721_-_PVP01_1031700_3	0.104337
AMRU_Ao_CTTCTCTGTGTCAATC	AMRU	Ao	6639	PvP01_10_v1_2721_-_PVP01_1031700_3	0.0741455
AMRU_Ao_CTTGGCTAGACGACGT	AMRU	Ao	7226	PvP01_10_v1_2721_-_PVP01_1031700_3	0
AMRU_Ao_CTTGGCTAGTCCATAC	AMRU	Ao	8817	PvP01_10_v1_2721_-_PVP01_1031700_3	0
AMRU_Ao_CTTGGCTCAACTGCGC	AMRU	Ao	2309	PvP01_10_v1_2721_-_PVP01_1031700_3	0
AMRU_Ao_CTTGGCTGTAGTACCT	AMRU	Ao	2405	PvP01_10_v1_2721_-_PVP01_1031700_3	0
AMRU_Ao_CTTGGCTGTCGAATCT	AMRU	Ao	2703	PvP01_10_v1_2721_-_PVP01_1031700_3	0
AMRU_Ao_CTTGGCTGTCGACTAT	AMRU	Ao	2151	PvP01_10_v1_2721_-_PVP01_1031700_3	0
AMRU_Ao_CTTGGCTGTTAAAGAC	AMRU	Ao	5498	PvP01_10_v1_2721_-_PVP01_1031700_3	0
AMRU_Ao_CTTGGCTTCAGTTTGG	AMRU	Ao	801	PvP01_10_v1_2721_-_PVP01_1031700_3	0
AMRU_Ao_CTTGGCTTCCGTTGTC	AMRU	Ao	4686	PvP01_10_v1_2721_-_PVP01_1031700_3	0
AMRU_Ao_CTTTGCGAGTGTCCAT	AMRU	Ao	3504	PvP01_10_v1_2721_-_PVP01_1031700_3	0
AMRU_Ao_CTTTGCGCAGTGACAG	AMRU	Ao	5239	PvP01_10_v1_2721_-_PVP01_1031700_3	0
AMRU_Ao_CTTTGCGGTAATTGGA	AMRU	Ao	5023	PvP01_10_v1_2721_-_PVP01_1031700_3	0.197355
AMRU_Ao_CTTTGCGTCTCTGCTG	AMRU	Ao	7120	PvP01_10_v1_2721_-_PVP01_1031700_3	0
AMRU_Ao_GAAACTCAGAGGTAGA	AMRU	Ao	3430	PvP01_10_v1_2721_-_PVP01_1031700_3	0.0474406
AMRU_Ao_GAAACTCAGTACGATA	AMRU	Ao	8548	PvP01_10_v1_2721_-_PVP01_1031700_3	0
AMRU_Ao_GAAACTCAGTGTCCAT	AMRU	Ao	4906	PvP01_10_v1_2721_-_PVP01_1031700_3	0
AMRU_Ao_GAAACTCCACACATGT	AMRU	Ao	4006	PvP01_10_v1_2721_-_PVP01_1031700_3	0
AMRU_Ao_GAAACTCGTCGCGGTT	AMRU	Ao	3530	PvP01_10_v1_2721_-_PVP01_1031700_3	0
AMRU_Ao_GAAACTCGTTAAGATG	AMRU	Ao	2607	PvP01_10_v1_2721_-_PVP01_1031700_3	0
AMRU_Ao_GAAATGACACAGGTTT	AMRU	Ao	4954	PvP01_10_v1_2721_-_PVP01_1031700_3	0
AMRU_Ao_GAAATGACAGATTGCT	AMRU	Ao	3147	PvP01_10_v1_2721_-_PVP01_1031700_3	0
AMRU_Ao_GAAATGAGTACAGCAG	AMRU	Ao	3969	PvP01_10_v1_2721_-_PVP01_1031700_3	0
AMRU_Ao_GAAATGATCGTGACAT	AMRU	Ao	3855	PvP01_10_v1_2721_-_PVP01_1031700_3	0
AMRU_Ao_GAACATCAGAAGGGTA	AMRU	Ao	124	PvP01_10_v1_2721_-_PVP01_1031700_3	0
AMRU_Ao_GAACATCAGGATCGCA	AMRU	Ao	2039	PvP01_10_v1_2721_-_PVP01_1031700_3	0
AMRU_Ao_GAACATCCAGTATGCT	AMRU	Ao	2220	PvP01_10_v1_2721_-_PVP01_1031700_3	0
AMRU_Ao_GAACATCGTCCCTTGT	AMRU	Ao	8915	PvP01_10_v1_2721_-_PVP01_1031700_3	0
AMRU_Ao_GAACATCTCGCCAAAT	AMRU	Ao	5021	PvP01_10_v1_2721_-_PVP01_1031700_3	0
AMRU_Ao_GAACCTAAGCCTATGT	AMRU	Ao	5329	PvP01_10_v1_2721_-_PVP01_1031700_3	0
AMRU_Ao_GAACCTACAAAGAATC	AMRU	Ao	4604	PvP01_10_v1_2721_-_PVP01_1031700_3	0
AMRU_Ao_GAACCTACAAGTCTGT	AMRU	Ao	3373	PvP01_10_v1_2721_-_PVP01_1031700_3	0
AMRU_Ao_GAACCTACATGCTAGT	AMRU	Ao	6466	PvP01_10_v1_2721_-_PVP01_1031700_3	0
AMRU_Ao_GAACGGAAGTTCGATC	AMRU	Ao	6666	PvP01_10_v1_2721_-_PVP01_1031700_3	0
AMRU_Ao_GAACGGACAAGCCCAC	AMRU	Ao	1022	PvP01_10_v1_2721_-_PVP01_1031700_3	0
AMRU_Ao_GAACGGACAAGGTTCT	AMRU	Ao	8430	PvP01_10_v1_2721_-_PVP01_1031700_3	0
AMRU_Ao_GAACGGACACAGGTTT	AMRU	Ao	5020	PvP01_10_v1_2721_-_PVP01_1031700_3	0
AMRU_Ao_GAACGGAGTGAGTGAC	AMRU	Ao	4589	PvP01_10_v1_2721_-_PVP01_1031700_3	0.053888
AMRU_Ao_GAAGCAGAGACTCGGA	AMRU	Ao	4706	PvP01_10_v1_2721_-_PVP01_1031700_3	0
AMRU_Ao_GAAGCAGAGGCGTACA	AMRU	Ao	1614	PvP01_10_v1_2721_-_PVP01_1031700_3	0
AMRU_Ao_GAAGCAGAGTGGTAGC	AMRU	Ao	6202	PvP01_10_v1_2721_-_PVP01_1031700_3	0
AMRU_Ao_GAAGCAGCACTGTTAG	AMRU	Ao	1326	PvP01_10_v1_2721_-_PVP01_1031700_3	0
AMRU_Ao_GAAGCAGCAGTCACTA	AMRU	Ao	2961	PvP01_10_v1_2721_-_PVP01_1031700_3	0
AMRU_Ao_GAAGCAGTCAGCTCTC	AMRU	Ao	8522	PvP01_10_v1_2721_-_PVP01_1031700_3	0
AMRU_Ao_GAAGCAGTCTTGACGA	AMRU	Ao	5086	PvP01_10_v1_2721_-_PVP01_1031700_3	0
AMRU_Ao_GAATAAGGTACTCAAC	AMRU	Ao	5022	PvP01_10_v1_2721_-_PVP01_1031700_3	0
AMRU_Ao_GAATAAGGTAGCAAAT	AMRU	Ao	9158	PvP01_10_v1_2721_-_PVP01_1031700_3	0
AMRU_Ao_GAATGAAAGCTCCTCT	AMRU	Ao	6977	PvP01_10_v1_2721_-_PVP01_1031700_3	0
AMRU_Ao_GAATGAAAGTGGTAAT	AMRU	Ao	1626	PvP01_10_v1_2721_-_PVP01_1031700_3	0
AMRU_Ao_GAATGAACACGGATAG	AMRU	Ao	4974	PvP01_10_v1_2721_-_PVP01_1031700_3	0
AMRU_Ao_GAATGAACATCCAACA	AMRU	Ao	7300	PvP01_10_v1_2721_-_PVP01_1031700_3	0
AMRU_Ao_GAATGAATCACAACGT	AMRU	Ao	2871	PvP01_10_v1_2721_-_PVP01_1031700_3	0
AMRU_Ao_GACACGCAGGCGATAC	AMRU	Ao	2077	PvP01_10_v1_2721_-_PVP01_1031700_3	0
AMRU_Ao_GACACGCCATGCCCGA	AMRU	Ao	2504	PvP01_10_v1_2721_-_PVP01_1031700_3	0
AMRU_Ao_GACACGCCATTACCTT	AMRU	Ao	8255	PvP01_10_v1_2721_-_PVP01_1031700_3	0
AMRU_Ao_GACACGCGTTACAGAA	AMRU	Ao	8676	PvP01_10_v1_2721_-_PVP01_1031700_3	0
AMRU_Ao_GACACGCTCGCCTGAG	AMRU	Ao	832	PvP01_10_v1_2721_-_PVP01_1031700_3	0
AMRU_Ao_GACAGAGTCGTACCGG	AMRU	Ao	4162	PvP01_10_v1_2721_-_PVP01_1031700_3	0
AMRU_Ao_GACCAATCACGAAACG	AMRU	Ao	2589	PvP01_10_v1_2721_-_PVP01_1031700_3	0
AMRU_Ao_GACCAATCATGTAAGA	AMRU	Ao	4621	PvP01_10_v1_2721_-_PVP01_1031700_3	0
AMRU_Ao_GACCAATGTAGCGTAG	AMRU	Ao	3754	PvP01_10_v1_2721_-_PVP01_1031700_3	0
AMRU_Ao_GACCTGGAGACAAGCC	AMRU	Ao	5078	PvP01_10_v1_2721_-_PVP01_1031700_3	0
AMRU_Ao_GACCTGGAGACATAAC	AMRU	Ao	8766	PvP01_10_v1_2721_-_PVP01_1031700_3	0
AMRU_Ao_GACCTGGAGCGACGTA	AMRU	Ao	4079	PvP01_10_v1_2721_-_PVP01_1031700_3	0
AMRU_Ao_GACCTGGAGTGGTAAT	AMRU	Ao	4358	PvP01_10_v1_2721_-_PVP01_1031700_3	0
AMRU_Ao_GACCTGGGTATAAACG	AMRU	Ao	4777	PvP01_10_v1_2721_-_PVP01_1031700_3	0
AMRU_Ao_GACCTGGGTTGCCTCT	AMRU	Ao	8149	PvP01_10_v1_2721_-_PVP01_1031700_3	0
AMRU_Ao_GACGCGTGTCGGATCC	AMRU	Ao	8667	PvP01_10_v1_2721_-_PVP01_1031700_3	0
AMRU_Ao_GACGCGTGTGAAAGAG	AMRU	Ao	5065	PvP01_10_v1_2721_-_PVP01_1031700_3	0.0586304
AMRU_Ao_GACGCGTGTGATAAGT	AMRU	Ao	8672	PvP01_10_v1_2721_-_PVP01_1031700_3	0
AMRU_Ao_GACGCGTTCATCTGTT	AMRU	Ao	4180	PvP01_10_v1_2721_-_PVP01_1031700_3	0
AMRU_Ao_GACGGCTAGGGATGGG	AMRU	Ao	8715	PvP01_10_v1_2721_-_PVP01_1031700_3	0
AMRU_Ao_GACGGCTAGGTCGGAT	AMRU	Ao	8353	PvP01_10_v1_2721_-_PVP01_1031700_3	0
AMRU_Ao_GACGGCTAGTGGACGT	AMRU	Ao	2448	PvP01_10_v1_2721_-_PVP01_1031700_3	0
AMRU_Ao_GACGGCTCACATCTTT	AMRU	Ao	5562	PvP01_10_v1_2721_-_PVP01_1031700_3	0.114863
AMRU_Ao_GACGGCTTCCGCAAGC	AMRU	Ao	3546	PvP01_10_v1_2721_-_PVP01_1031700_3	0
AMRU_Ao_GACGGCTTCTGGTATG	AMRU	Ao	8629	PvP01_10_v1_2721_-_PVP01_1031700_3	0
AMRU_Ao_GACGTGCAGTGAAGTT	AMRU	Ao	3412	PvP01_10_v1_2721_-_PVP01_1031700_3	0.132732
AMRU_Ao_GACGTGCCATTGTGCA	AMRU	Ao	2359	PvP01_10_v1_2721_-_PVP01_1031700_3	0
AMRU_Ao_GACGTGCGTACACCGC	AMRU	Ao	4685	PvP01_10_v1_2721_-_PVP01_1031700_3	0
AMRU_Ao_GACGTGCTCAGAGGTG	AMRU	Ao	8857	PvP01_10_v1_2721_-_PVP01_1031700_3	0
AMRU_Ao_GACGTTACAAGGTTTC	AMRU	Ao	2752	PvP01_10_v1_2721_-_PVP01_1031700_3	0
AMRU_Ao_GACGTTACAATGGATA	AMRU	Ao	1898	PvP01_10_v1_2721_-_PVP01_1031700_3	0
AMRU_Ao_GACGTTATCACCCTCA	AMRU	Ao	4770	PvP01_10_v1_2721_-_PVP01_1031700_3	0
AMRU_Ao_GACGTTATCCTGCTTG	AMRU	Ao	1885	PvP01_10_v1_2721_-_PVP01_1031700_3	0
AMRU_Ao_GACGTTATCTGAGGGA	AMRU	Ao	688	PvP01_10_v1_2721_-_PVP01_1031700_3	0
AMRU_Ao_GACGTTATCTGCCAGG	AMRU	Ao	3593	PvP01_10_v1_2721_-_PVP01_1031700_3	0
AMRU_Ao_GACTAACAGGCAGGTT	AMRU	Ao	8423	PvP01_10_v1_2721_-_PVP01_1031700_3	0
AMRU_Ao_GACTAACAGGCTAGCA	AMRU	Ao	6997	PvP01_10_v1_2721_-_PVP01_1031700_3	0
AMRU_Ao_GACTAACCACGAAACG	AMRU	Ao	4225	PvP01_10_v1_2721_-_PVP01_1031700_3	0
AMRU_Ao_GACTACAAGAAACGAG	AMRU	Ao	6607	PvP01_10_v1_2721_-_PVP01_1031700_3	0
AMRU_Ao_GACTACAAGATTACCC	AMRU	Ao	954	PvP01_10_v1_2721_-_PVP01_1031700_3	0
AMRU_Ao_GACTACATCAGGCAAG	AMRU	Ao	5916	PvP01_10_v1_2721_-_PVP01_1031700_3	0.0506611
AMRU_Ao_GACTACATCCCAAGAT	AMRU	Ao	2389	PvP01_10_v1_2721_-_PVP01_1031700_3	0
AMRU_Ao_GACTGCGAGCATGGCA	AMRU	Ao	3844	PvP01_10_v1_2721_-_PVP01_1031700_3	0
AMRU_Ao_GACTGCGGTGCACCAC	AMRU	Ao	5450	PvP01_10_v1_2721_-_PVP01_1031700_3	0
AMRU_Ao_GACTGCGTCCTGCCAT	AMRU	Ao	6933	PvP01_10_v1_2721_-_PVP01_1031700_3	0
AMRU_Ao_GAGCAGAAGAAGAAGC	AMRU	Ao	8377	PvP01_10_v1_2721_-_PVP01_1031700_3	0
AMRU_Ao_GAGCAGAAGTATTGGA	AMRU	Ao	7929	PvP01_10_v1_2721_-_PVP01_1031700_3	0
AMRU_Ao_GAGCAGACAAGGACTG	AMRU	Ao	358	PvP01_10_v1_2721_-_PVP01_1031700_3	0
AMRU_Ao_GAGCAGACAATGGACG	AMRU	Ao	3472	PvP01_10_v1_2721_-_PVP01_1031700_3	0
AMRU_Ao_GAGCAGATCAGAGCTT	AMRU	Ao	6546	PvP01_10_v1_2721_-_PVP01_1031700_3	0
AMRU_Ao_GAGCAGATCGGTCCGA	AMRU	Ao	3100	PvP01_10_v1_2721_-_PVP01_1031700_3	0
AMRU_Ao_GAGGTGAAGAGTAAGG	AMRU	Ao	4415	PvP01_10_v1_2721_-_PVP01_1031700_3	0
AMRU_Ao_GAGGTGAAGTGAACAT	AMRU	Ao	4751	PvP01_10_v1_2721_-_PVP01_1031700_3	0
AMRU_Ao_GAGGTGACACTAAGTC	AMRU	Ao	8079	PvP01_10_v1_2721_-_PVP01_1031700_3	0.0280662
AMRU_Ao_GAGGTGACAGACAGGT	AMRU	Ao	409	PvP01_10_v1_2721_-_PVP01_1031700_3	0
AMRU_Ao_GAGGTGAGTAGCGCAA	AMRU	Ao	5322	PvP01_10_v1_2721_-_PVP01_1031700_3	0
AMRU_Ao_GAGGTGAGTCACCTAA	AMRU	Ao	3830	PvP01_10_v1_2721_-_PVP01_1031700_3	0
AMRU_Ao_GAGTCCGAGGTTACCT	AMRU	Ao	4303	PvP01_10_v1_2721_-_PVP01_1031700_3	0
AMRU_Ao_GAGTCCGCAGCGTAAG	AMRU	Ao	2123	PvP01_10_v1_2721_-_PVP01_1031700_3	0
AMRU_Ao_GAGTCCGGTTCGGGCT	AMRU	Ao	8379	PvP01_10_v1_2721_-_PVP01_1031700_3	0
AMRU_Ao_GATCAGTAGCATCATC	AMRU	Ao	6594	PvP01_10_v1_2721_-_PVP01_1031700_3	0.0460045
AMRU_Ao_GATCAGTGTTAGGGTG	AMRU	Ao	7196	PvP01_10_v1_2721_-_PVP01_1031700_3	0
AMRU_Ao_GATCGATGTAGGACAC	AMRU	Ao	4472	PvP01_10_v1_2721_-_PVP01_1031700_3	0
AMRU_Ao_GATCGCGGTTAAAGAC	AMRU	Ao	5755	PvP01_10_v1_2721_-_PVP01_1031700_3	0
AMRU_Ao_GATCGCGTCCCGGATG	AMRU	Ao	7152	PvP01_10_v1_2721_-_PVP01_1031700_3	0
AMRU_Ao_GATCGTAAGTCATGCT	AMRU	Ao	5049	PvP01_10_v1_2721_-_PVP01_1031700_3	0
AMRU_Ao_GATCGTACAAACCTAC	AMRU	Ao	8509	PvP01_10_v1_2721_-_PVP01_1031700_3	0
AMRU_Ao_GATCGTACAGGTCTCG	AMRU	Ao	4715	PvP01_10_v1_2721_-_PVP01_1031700_3	0
AMRU_Ao_GATCGTAGTGAGGCTA	AMRU	Ao	7775	PvP01_10_v1_2721_-_PVP01_1031700_3	0
AMRU_Ao_GATCTAGCAAGTAATG	AMRU	Ao	1808	PvP01_10_v1_2721_-_PVP01_1031700_3	0
AMRU_Ao_GATCTAGCAGTCGTGC	AMRU	Ao	4619	PvP01_10_v1_2721_-_PVP01_1031700_3	0
AMRU_Ao_GATCTAGTCAAACGGG	AMRU	Ao	169	PvP01_10_v1_2721_-_PVP01_1031700_3	0
AMRU_Ao_GATCTAGTCTACCAGA	AMRU	Ao	8224	PvP01_10_v1_2721_-_PVP01_1031700_3	0
AMRU_Ao_GATGAAACAATCTGCA	AMRU	Ao	7664	PvP01_10_v1_2721_-_PVP01_1031700_3	0
AMRU_Ao_GATGAAACAGACGTAG	AMRU	Ao	1261	PvP01_10_v1_2721_-_PVP01_1031700_3	0
AMRU_Ao_GATGAAAGTAAAGGAG	AMRU	Ao	3556	PvP01_10_v1_2721_-_PVP01_1031700_3	0
AMRU_Ao_GATGAAAGTGAGTGAC	AMRU	Ao	1879	PvP01_10_v1_2721_-_PVP01_1031700_3	0
AMRU_Ao_GATGAAAGTTCGGGCT	AMRU	Ao	119	PvP01_10_v1_2721_-_PVP01_1031700_3	0
AMRU_Ao_GATGAAATCACTTACT	AMRU	Ao	3686	PvP01_10_v1_2721_-_PVP01_1031700_3	0
AMRU_Ao_GATGAAATCGTCTGCT	AMRU	Ao	3288	PvP01_10_v1_2721_-_PVP01_1031700_3	0
AMRU_Ao_GATGAAATCTATCCCG	AMRU	Ao	3360	PvP01_10_v1_2721_-_PVP01_1031700_3	0.125068
AMRU_Ao_GATGAGGCAGACAAAT	AMRU	Ao	7	PvP01_10_v1_2721_-_PVP01_1031700_3	0
AMRU_Ao_GATGAGGCATATGCTG	AMRU	Ao	3393	PvP01_10_v1_2721_-_PVP01_1031700_3	0
AMRU_Ao_GATGAGGGTTAGTGGG	AMRU	Ao	3407	PvP01_10_v1_2721_-_PVP01_1031700_3	0
AMRU_Ao_GATGCTAAGTACGACG	AMRU	Ao	4939	PvP01_10_v1_2721_-_PVP01_1031700_3	0.0386593
AMRU_Ao_GATGCTACAAGAAAGG	AMRU	Ao	3582	PvP01_10_v1_2721_-_PVP01_1031700_3	0
AMRU_Ao_GATGCTACACGAGAGT	AMRU	Ao	3795	PvP01_10_v1_2721_-_PVP01_1031700_3	0
AMRU_Ao_GATGCTAGTACAGTTC	AMRU	Ao	4640	PvP01_10_v1_2721_-_PVP01_1031700_3	0.0450146
AMRU_Ao_GATGCTATCACATGCA	AMRU	Ao	79	PvP01_10_v1_2721_-_PVP01_1031700_3	0
AMRU_Ao_GATTCAGAGTATTGGA	AMRU	Ao	8586	PvP01_10_v1_2721_-_PVP01_1031700_3	0
AMRU_Ao_GCAAACTAGCGTAGTG	AMRU	Ao	3204	PvP01_10_v1_2721_-_PVP01_1031700_3	0
AMRU_Ao_GCAAACTCAGTAACGG	AMRU	Ao	4788	PvP01_10_v1_2721_-_PVP01_1031700_3	0
AMRU_Ao_GCAAACTCATGCGCAC	AMRU	Ao	3465	PvP01_10_v1_2721_-_PVP01_1031700_3	0
AMRU_Ao_GCAAACTTCATAGCAC	AMRU	Ao	3866	PvP01_10_v1_2721_-_PVP01_1031700_3	0.0469439
AMRU_Ao_GCAAACTTCGAGGTAG	AMRU	Ao	1875	PvP01_10_v1_2721_-_PVP01_1031700_3	0
AMRU_Ao_GCAAACTTCGTGGACC	AMRU	Ao	6688	PvP01_10_v1_2721_-_PVP01_1031700_3	0
AMRU_Ao_GCAATCACAACCGCCA	AMRU	Ao	8909	PvP01_10_v1_2721_-_PVP01_1031700_3	0.0488556
AMRU_Ao_GCAATCATCCGTTGTC	AMRU	Ao	3893	PvP01_10_v1_2721_-_PVP01_1031700_3	0
AMRU_Ao_GCACATAAGCAGGTCA	AMRU	Ao	5323	PvP01_10_v1_2721_-_PVP01_1031700_3	0.101225
AMRU_Ao_GCACATAAGCGATAGC	AMRU	Ao	4280	PvP01_10_v1_2721_-_PVP01_1031700_3	0
AMRU_Ao_GCACATACATCGACGC	AMRU	Ao	1911	PvP01_10_v1_2721_-_PVP01_1031700_3	0
AMRU_Ao_GCACATAGTAATAGCA	AMRU	Ao	4856	PvP01_10_v1_2721_-_PVP01_1031700_3	0.0838785
AMRU_Ao_GCACATAGTACCAGTT	AMRU	Ao	7700	PvP01_10_v1_2721_-_PVP01_1031700_3	0
AMRU_Ao_GCACATAGTCTTGTCC	AMRU	Ao	4238	PvP01_10_v1_2721_-_PVP01_1031700_3	0
AMRU_Ao_GCACTCTCACCATCCT	AMRU	Ao	5811	PvP01_10_v1_2721_-_PVP01_1031700_3	0
AMRU_Ao_GCAGCCATCTTCTGGC	AMRU	Ao	6029	PvP01_10_v1_2721_-_PVP01_1031700_3	0
AMRU_Ao_GCAGTTATCCGTCATC	AMRU	Ao	5621	PvP01_10_v1_2721_-_PVP01_1031700_3	0.0377003
AMRU_Ao_GCATACACACCATCCT	AMRU	Ao	4199	PvP01_10_v1_2721_-_PVP01_1031700_3	0.0471565
AMRU_Ao_GCATGATCACTATCTT	AMRU	Ao	436	PvP01_10_v1_2721_-_PVP01_1031700_3	0
AMRU_Ao_GCATGATTCTCGAGTA	AMRU	Ao	8242	PvP01_10_v1_2721_-_PVP01_1031700_3	0
AMRU_Ao_GCATGATTCTTAGAGC	AMRU	Ao	4176	PvP01_10_v1_2721_-_PVP01_1031700_3	0
AMRU_Ao_GCATGCGAGAGCTGGT	AMRU	Ao	4872	PvP01_10_v1_2721_-_PVP01_1031700_3	0.0387537
AMRU_Ao_GCATGCGGTAAGTTCC	AMRU	Ao	1960	PvP01_10_v1_2721_-_PVP01_1031700_3	0
AMRU_Ao_GCATGCGGTTGAACTC	AMRU	Ao	1569	PvP01_10_v1_2721_-_PVP01_1031700_3	0
AMRU_Ao_GCATGCGGTTTAAGCC	AMRU	Ao	5387	PvP01_10_v1_2721_-_PVP01_1031700_3	0
AMRU_Ao_GCATGTAAGCTGTCTA	AMRU	Ao	1827	PvP01_10_v1_2721_-_PVP01_1031700_3	0
AMRU_Ao_GCATGTACACAACGCC	AMRU	Ao	4915	PvP01_10_v1_2721_-_PVP01_1031700_3	0
AMRU_Ao_GCATGTATCTTGACGA	AMRU	Ao	80	PvP01_10_v1_2721_-_PVP01_1031700_3	0
AMRU_Ao_GCCAAATAGCACGCCT	AMRU	Ao	4834	PvP01_10_v1_2721_-_PVP01_1031700_3	0
AMRU_Ao_GCCAAATTCAGAAATG	AMRU	Ao	5778	PvP01_10_v1_2721_-_PVP01_1031700_3	0.0543478
AMRU_Ao_GCCTCTACAGACGCAA	AMRU	Ao	4286	PvP01_10_v1_2721_-_PVP01_1031700_3	0
AMRU_Ao_GCCTCTACATGCTAGT	AMRU	Ao	6554	PvP01_10_v1_2721_-_PVP01_1031700_3	0.169991
AMRU_Ao_GCCTCTAGTTCAGCGC	AMRU	Ao	1691	PvP01_10_v1_2721_-_PVP01_1031700_3	0
AMRU_Ao_GCGACCACATCGTCGG	AMRU	Ao	5011	PvP01_10_v1_2721_-_PVP01_1031700_3	0.0526732
AMRU_Ao_GCGACCAGTCAGATAA	AMRU	Ao	3149	PvP01_10_v1_2721_-_PVP01_1031700_3	0
AMRU_Ao_GCGACCAGTCCCGACA	AMRU	Ao	3558	PvP01_10_v1_2721_-_PVP01_1031700_3	0
AMRU_Ao_GCGACCAGTGTCAATC	AMRU	Ao	7623	PvP01_10_v1_2721_-_PVP01_1031700_3	0
AMRU_Ao_GCGAGAACAGACACTT	AMRU	Ao	8713	PvP01_10_v1_2721_-_PVP01_1031700_3	0
AMRU_Ao_GCGAGAAGTCGGGTCT	AMRU	Ao	2381	PvP01_10_v1_2721_-_PVP01_1031700_3	0
AMRU_Ao_GCGAGAATCTTCCTTC	AMRU	Ao	2951	PvP01_10_v1_2721_-_PVP01_1031700_3	0
AMRU_Ao_GCGCAACAGCCACCTG	AMRU	Ao	5887	PvP01_10_v1_2721_-_PVP01_1031700_3	0
AMRU_Ao_GCGCAACAGTCCGTAT	AMRU	Ao	1099	PvP01_10_v1_2721_-_PVP01_1031700_3	0
AMRU_Ao_GCGCAGTAGGCAAAGA	AMRU	Ao	3211	PvP01_10_v1_2721_-_PVP01_1031700_3	0
AMRU_Ao_GCGCAGTCAATGGAGC	AMRU	Ao	3637	PvP01_10_v1_2721_-_PVP01_1031700_3	0
AMRU_Ao_GCGCAGTGTCGCTTTC	AMRU	Ao	8417	PvP01_10_v1_2721_-_PVP01_1031700_3	0
AMRU_Ao_GCGCCAAAGGCTAGAC	AMRU	Ao	3952	PvP01_10_v1_2721_-_PVP01_1031700_3	0
AMRU_Ao_GCGCCAACACAAGACG	AMRU	Ao	1925	PvP01_10_v1_2721_-_PVP01_1031700_3	0
AMRU_Ao_GCGCGATAGAAGATTC	AMRU	Ao	3109	PvP01_10_v1_2721_-_PVP01_1031700_3	0
AMRU_Ao_GCGCGATAGTGAAGAG	AMRU	Ao	1598	PvP01_10_v1_2721_-_PVP01_1031700_3	0
AMRU_Ao_GCGCGATCAGTCCTTC	AMRU	Ao	5901	PvP01_10_v1_2721_-_PVP01_1031700_3	0.0673718
AMRU_Ao_GCGCGATGTCGGCTCA	AMRU	Ao	8077	PvP01_10_v1_2721_-_PVP01_1031700_3	0
AMRU_Ao_GCGCGATTCACAGTAC	AMRU	Ao	8806	PvP01_10_v1_2721_-_PVP01_1031700_3	0
AMRU_Ao_GCGGGTTAGCAACGGT	AMRU	Ao	4110	PvP01_10_v1_2721_-_PVP01_1031700_3	0.145624
AMRU_Ao_GCGGGTTAGGGTGTGT	AMRU	Ao	2966	PvP01_10_v1_2721_-_PVP01_1031700_3	0
AMRU_Ao_GCGGGTTGTATGAATG	AMRU	Ao	3679	PvP01_10_v1_2721_-_PVP01_1031700_3	0
AMRU_Ao_GCGGGTTTCAGCCTAA	AMRU	Ao	3833	PvP01_10_v1_2721_-_PVP01_1031700_3	0
AMRU_Ao_GCGGGTTTCAGGCCCA	AMRU	Ao	4284	PvP01_10_v1_2721_-_PVP01_1031700_3	0
AMRU_Ao_GCGGGTTTCCAAACTG	AMRU	Ao	8853	PvP01_10_v1_2721_-_PVP01_1031700_3	0
AMRU_Ao_GCTCCTAGTAACGTTC	AMRU	Ao	8476	PvP01_10_v1_2721_-_PVP01_1031700_3	0
AMRU_Ao_GCTCCTAGTGTGTGCC	AMRU	Ao	4476	PvP01_10_v1_2721_-_PVP01_1031700_3	0.0339294
AMRU_Ao_GCTCCTATCAATACCG	AMRU	Ao	1893	PvP01_10_v1_2721_-_PVP01_1031700_3	0
AMRU_Ao_GCTCCTATCACGACTA	AMRU	Ao	5700	PvP01_10_v1_2721_-_PVP01_1031700_3	0
AMRU_Ao_GCTCCTATCCTGTAGA	AMRU	Ao	4628	PvP01_10_v1_2721_-_PVP01_1031700_3	0
AMRU_Ao_GCTCTGTCATCAGTCA	AMRU	Ao	4245	PvP01_10_v1_2721_-_PVP01_1031700_3	0
AMRU_Ao_GCTCTGTGTGCAGGTA	AMRU	Ao	2024	PvP01_10_v1_2721_-_PVP01_1031700_3	0
AMRU_Ao_GCTGCAGCAGGACCCT	AMRU	Ao	5483	PvP01_10_v1_2721_-_PVP01_1031700_3	0.0709774
AMRU_Ao_GCTGCAGGTAGCTGCC	AMRU	Ao	5508	PvP01_10_v1_2721_-_PVP01_1031700_3	0.0693433
AMRU_Ao_GCTGCAGGTCTACCTC	AMRU	Ao	6229	PvP01_10_v1_2721_-_PVP01_1031700_3	0
AMRU_Ao_GCTGCAGGTCTCATCC	AMRU	Ao	1744	PvP01_10_v1_2721_-_PVP01_1031700_3	0
AMRU_Ao_GCTGCAGTCAATACCG	AMRU	Ao	3306	PvP01_10_v1_2721_-_PVP01_1031700_3	0
AMRU_Ao_GCTGCAGTCCTCAATT	AMRU	Ao	6287	PvP01_10_v1_2721_-_PVP01_1031700_3	0.0488043
AMRU_Ao_GCTGCAGTCCTTAATC	AMRU	Ao	2879	PvP01_10_v1_2721_-_PVP01_1031700_3	0
AMRU_Ao_GCTGCGAAGCAATATG	AMRU	Ao	3775	PvP01_10_v1_2721_-_PVP01_1031700_3	0
AMRU_Ao_GCTGCGACACCGGAAA	AMRU	Ao	4736	PvP01_10_v1_2721_-_PVP01_1031700_3	0
AMRU_Ao_GCTGCGACATGCATGT	AMRU	Ao	5161	PvP01_10_v1_2721_-_PVP01_1031700_3	0
AMRU_Ao_GCTGCGATCATTGCGA	AMRU	Ao	1871	PvP01_10_v1_2721_-_PVP01_1031700_3	0
AMRU_Ao_GCTGCGATCCCTGACT	AMRU	Ao	2735	PvP01_10_v1_2721_-_PVP01_1031700_3	0
AMRU_Ao_GCTGCGATCTTACCGC	AMRU	Ao	5918	PvP01_10_v1_2721_-_PVP01_1031700_3	0
AMRU_Ao_GCTGCTTGTTCGTCTC	AMRU	Ao	6220	PvP01_10_v1_2721_-_PVP01_1031700_3	0.0521295
AMRU_Ao_GCTGCTTTCATCATTC	AMRU	Ao	8616	PvP01_10_v1_2721_-_PVP01_1031700_3	0.026718
AMRU_Ao_GCTGCTTTCCTGCAGG	AMRU	Ao	2795	PvP01_10_v1_2721_-_PVP01_1031700_3	0
AMRU_Ao_GCTGCTTTCTCTGCTG	AMRU	Ao	7713	PvP01_10_v1_2721_-_PVP01_1031700_3	0
AMRU_Ao_GCTGGGTAGAGTACCG	AMRU	Ao	3592	PvP01_10_v1_2721_-_PVP01_1031700_3	0
AMRU_Ao_GCTGGGTTCCTTTACA	AMRU	Ao	6372	PvP01_10_v1_2721_-_PVP01_1031700_3	0
AMRU_Ao_GCTTCCAAGATAGGAG	AMRU	Ao	3950	PvP01_10_v1_2721_-_PVP01_1031700_3	0
AMRU_Ao_GCTTCCAAGGACGAAA	AMRU	Ao	4482	PvP01_10_v1_2721_-_PVP01_1031700_3	0.0520481
AMRU_Ao_GCTTCCACAAAGGTGC	AMRU	Ao	4572	PvP01_10_v1_2721_-_PVP01_1031700_3	0
AMRU_Ao_GCTTCCACACCATGTA	AMRU	Ao	7515	PvP01_10_v1_2721_-_PVP01_1031700_3	0
AMRU_Ao_GCTTCCACACCGCTAG	AMRU	Ao	3886	PvP01_10_v1_2721_-_PVP01_1031700_3	0.0362634
AMRU_Ao_GCTTCCAGTTTAGGAA	AMRU	Ao	5439	PvP01_10_v1_2721_-_PVP01_1031700_3	0
AMRU_Ao_GCTTCCATCCTAGTGA	AMRU	Ao	5793	PvP01_10_v1_2721_-_PVP01_1031700_3	1.43253
AMRU_Ao_GCTTGAATCGGCCGAT	AMRU	Ao	5959	PvP01_10_v1_2721_-_PVP01_1031700_3	0
AMRU_Ao_GCTTGAATCGGTCCGA	AMRU	Ao	4082	PvP01_10_v1_2721_-_PVP01_1031700_3	0
AMRU_Ao_GGAAAGCAGGCTAGCA	AMRU	Ao	8777	PvP01_10_v1_2721_-_PVP01_1031700_3	0
AMRU_Ao_GGAAAGCGTGCCTGTG	AMRU	Ao	6203	PvP01_10_v1_2721_-_PVP01_1031700_3	0
AMRU_Ao_GGAACTTAGACCTTTG	AMRU	Ao	4209	PvP01_10_v1_2721_-_PVP01_1031700_3	0
AMRU_Ao_GGAACTTAGCAACGGT	AMRU	Ao	8326	PvP01_10_v1_2721_-_PVP01_1031700_3	0
AMRU_Ao_GGAACTTAGTGGTAGC	AMRU	Ao	7402	PvP01_10_v1_2721_-_PVP01_1031700_3	0
AMRU_Ao_GGAACTTGTCACTGGC	AMRU	Ao	4057	PvP01_10_v1_2721_-_PVP01_1031700_3	0
AMRU_Ao_GGAACTTTCGTTGACA	AMRU	Ao	296	PvP01_10_v1_2721_-_PVP01_1031700_3	0
AMRU_Ao_GGAATAAAGGGCATGT	AMRU	Ao	3321	PvP01_10_v1_2721_-_PVP01_1031700_3	0
AMRU_Ao_GGAATAAAGTACGTTC	AMRU	Ao	8836	PvP01_10_v1_2721_-_PVP01_1031700_3	0
AMRU_Ao_GGAATAAGTCGCGGTT	AMRU	Ao	1496	PvP01_10_v1_2721_-_PVP01_1031700_3	0
AMRU_Ao_GGAATAATCTCGCATC	AMRU	Ao	4112	PvP01_10_v1_2721_-_PVP01_1031700_3	0.0501404
AMRU_Ao_GGACAAGCAATTGCTG	AMRU	Ao	322	PvP01_10_v1_2721_-_PVP01_1031700_3	0
AMRU_Ao_GGACAAGCAGTTAACC	AMRU	Ao	1985	PvP01_10_v1_2721_-_PVP01_1031700_3	0
AMRU_Ao_GGACAAGCATCACGAT	AMRU	Ao	2758	PvP01_10_v1_2721_-_PVP01_1031700_3	0
AMRU_Ao_GGACAAGGTCTAGTCA	AMRU	Ao	2421	PvP01_10_v1_2721_-_PVP01_1031700_3	0
AMRU_Ao_GGACAAGTCATAACCG	AMRU	Ao	4889	PvP01_10_v1_2721_-_PVP01_1031700_3	0.0491135
AMRU_Ao_GGACAGACAGGGTATG	AMRU	Ao	8537	PvP01_10_v1_2721_-_PVP01_1031700_3	0
AMRU_Ao_GGACAGATCAGGTTCA	AMRU	Ao	4331	PvP01_10_v1_2721_-_PVP01_1031700_3	0.0593401
AMRU_Ao_GGACAGATCGCGTTTC	AMRU	Ao	3137	PvP01_10_v1_2721_-_PVP01_1031700_3	0
AMRU_Ao_GGACATTAGCGCCTTG	AMRU	Ao	2431	PvP01_10_v1_2721_-_PVP01_1031700_3	0
AMRU_Ao_GGACATTGTAAACGCG	AMRU	Ao	5438	PvP01_10_v1_2721_-_PVP01_1031700_3	0.0381607
AMRU_Ao_GGACATTGTACAGCAG	AMRU	Ao	3916	PvP01_10_v1_2721_-_PVP01_1031700_3	0.116939
AMRU_Ao_GGACGTCAGCTGTTCA	AMRU	Ao	3275	PvP01_10_v1_2721_-_PVP01_1031700_3	0
AMRU_Ao_GGACGTCCAATGAATG	AMRU	Ao	4063	PvP01_10_v1_2721_-_PVP01_1031700_3	0
AMRU_Ao_GGAGCAACAGTTCCCT	AMRU	Ao	4123	PvP01_10_v1_2721_-_PVP01_1031700_3	0
AMRU_Ao_GGAGCAACATCGTCGG	AMRU	Ao	3474	PvP01_10_v1_2721_-_PVP01_1031700_3	0
AMRU_Ao_GGATGTTAGCTAGTGG	AMRU	Ao	7699	PvP01_10_v1_2721_-_PVP01_1031700_3	0
AMRU_Ao_GGATGTTCACTGTCGG	AMRU	Ao	3040	PvP01_10_v1_2721_-_PVP01_1031700_3	0
AMRU_Ao_GGATTACCAGAGTGTG	AMRU	Ao	5206	PvP01_10_v1_2721_-_PVP01_1031700_3	0
AMRU_Ao_GGATTACCATGGAATA	AMRU	Ao	9162	PvP01_10_v1_2721_-_PVP01_1031700_3	0
AMRU_Ao_GGATTACTCGGATGTT	AMRU	Ao	8771	PvP01_10_v1_2721_-_PVP01_1031700_3	0
AMRU_Ao_GGATTACTCTGCGACG	AMRU	Ao	8021	PvP01_10_v1_2721_-_PVP01_1031700_3	0
AMRU_Ao_GGCAATTAGACCCACC	AMRU	Ao	4969	PvP01_10_v1_2721_-_PVP01_1031700_3	0
AMRU_Ao_GGCAATTAGCTTCGCG	AMRU	Ao	7864	PvP01_10_v1_2721_-_PVP01_1031700_3	0
AMRU_Ao_GGCAATTCATGAGCGA	AMRU	Ao	1473	PvP01_10_v1_2721_-_PVP01_1031700_3	0
AMRU_Ao_GGCAATTGTTACGCGC	AMRU	Ao	8789	PvP01_10_v1_2721_-_PVP01_1031700_3	0
AMRU_Ao_GGCAATTTCCGGGTGT	AMRU	Ao	3666	PvP01_10_v1_2721_-_PVP01_1031700_3	0
AMRU_Ao_GGCCGATCACCTATCC	AMRU	Ao	8758	PvP01_10_v1_2721_-_PVP01_1031700_3	0
AMRU_Ao_GGCCGATCATATGCTG	AMRU	Ao	4831	PvP01_10_v1_2721_-_PVP01_1031700_3	0
AMRU_Ao_GGCCGATGTCTTTCAT	AMRU	Ao	4646	PvP01_10_v1_2721_-_PVP01_1031700_3	0
AMRU_Ao_GGCCGATTCGAGGTAG	AMRU	Ao	4429	PvP01_10_v1_2721_-_PVP01_1031700_3	0
AMRU_Ao_GGCGACTAGCGATATA	AMRU	Ao	3806	PvP01_10_v1_2721_-_PVP01_1031700_3	0
AMRU_Ao_GGCGACTAGCTCCCAG	AMRU	Ao	3705	PvP01_10_v1_2721_-_PVP01_1031700_3	0
AMRU_Ao_GGCGACTCAATGAAAC	AMRU	Ao	9069	PvP01_10_v1_2721_-_PVP01_1031700_3	0
AMRU_Ao_GGCGACTCATGCCTTC	AMRU	Ao	6623	PvP01_10_v1_2721_-_PVP01_1031700_3	0.0577968
AMRU_Ao_GGCGACTGTAATCGTC	AMRU	Ao	1396	PvP01_10_v1_2721_-_PVP01_1031700_3	0
AMRU_Ao_GGCGACTGTATCTGCA	AMRU	Ao	5390	PvP01_10_v1_2721_-_PVP01_1031700_3	0
AMRU_Ao_GGCGACTGTCCCTACT	AMRU	Ao	6355	PvP01_10_v1_2721_-_PVP01_1031700_3	0.0821828
AMRU_Ao_GGCGACTGTCGCTTTC	AMRU	Ao	2419	PvP01_10_v1_2721_-_PVP01_1031700_3	0
AMRU_Ao_GGCGACTGTCGTGGCT	AMRU	Ao	8735	PvP01_10_v1_2721_-_PVP01_1031700_3	0.0394182
AMRU_Ao_GGCGACTTCAAACGGG	AMRU	Ao	3761	PvP01_10_v1_2721_-_PVP01_1031700_3	0.064813
AMRU_Ao_GGCGACTTCCATGCTC	AMRU	Ao	4221	PvP01_10_v1_2721_-_PVP01_1031700_3	0.0976086
AMRU_Ao_GGCGTGTGTCGCTTCT	AMRU	Ao	4385	PvP01_10_v1_2721_-_PVP01_1031700_3	0
AMRU_Ao_GGCGTGTGTGGTTTCA	AMRU	Ao	8511	PvP01_10_v1_2721_-_PVP01_1031700_3	0
AMRU_Ao_GGCGTGTTCCAGTATG	AMRU	Ao	4496	PvP01_10_v1_2721_-_PVP01_1031700_3	0
AMRU_Ao_GGCGTGTTCTTATCTG	AMRU	Ao	4661	PvP01_10_v1_2721_-_PVP01_1031700_3	0.0481696
AMRU_Ao_GGCTCGAAGACTGTAA	AMRU	Ao	5123	PvP01_10_v1_2721_-_PVP01_1031700_3	0
AMRU_Ao_GGCTCGAAGTACATGA	AMRU	Ao	1665	PvP01_10_v1_2721_-_PVP01_1031700_3	0
AMRU_Ao_GGCTCGAGTCATCGGC	AMRU	Ao	8631	PvP01_10_v1_2721_-_PVP01_1031700_3	0.0592663
AMRU_Ao_GGCTCGATCCGCGGTA	AMRU	Ao	3200	PvP01_10_v1_2721_-_PVP01_1031700_3	0
AMRU_Ao_GGCTGGTAGCTCAACT	AMRU	Ao	6868	PvP01_10_v1_2721_-_PVP01_1031700_3	0.0716949
AMRU_Ao_GGCTGGTAGTGACATA	AMRU	Ao	3486	PvP01_10_v1_2721_-_PVP01_1031700_3	0
AMRU_Ao_GGCTGGTCAATGACCT	AMRU	Ao	8860	PvP01_10_v1_2721_-_PVP01_1031700_3	0
AMRU_Ao_GGCTGGTCAGTAAGCG	AMRU	Ao	8210	PvP01_10_v1_2721_-_PVP01_1031700_3	0
AMRU_Ao_GGGAATGAGATCTGAA	AMRU	Ao	4744	PvP01_10_v1_2721_-_PVP01_1031700_3	0
AMRU_Ao_GGGAATGGTATGGTTC	AMRU	Ao	4399	PvP01_10_v1_2721_-_PVP01_1031700_3	0
AMRU_Ao_GGGAATGTCGCATGAT	AMRU	Ao	4275	PvP01_10_v1_2721_-_PVP01_1031700_3	0.0473799
AMRU_Ao_GGGACCTCAATCCGAT	AMRU	Ao	8855	PvP01_10_v1_2721_-_PVP01_1031700_3	0
AMRU_Ao_GGGACCTCAGTGAGTG	AMRU	Ao	6222	PvP01_10_v1_2721_-_PVP01_1031700_3	0
AMRU_Ao_GGGACCTGTTGACGTT	AMRU	Ao	8852	PvP01_10_v1_2721_-_PVP01_1031700_3	0
AMRU_Ao_GGGACCTTCACAATGC	AMRU	Ao	4171	PvP01_10_v1_2721_-_PVP01_1031700_3	0
AMRU_Ao_GGGACCTTCTCCAACC	AMRU	Ao	3751	PvP01_10_v1_2721_-_PVP01_1031700_3	0
AMRU_Ao_GGGAGATCAGTGGGAT	AMRU	Ao	2837	PvP01_10_v1_2721_-_PVP01_1031700_3	0
AMRU_Ao_GGGATGACAGTGGAGT	AMRU	Ao	3050	PvP01_10_v1_2721_-_PVP01_1031700_3	0
AMRU_Ao_GGGCACTCACTATCTT	AMRU	Ao	4263	PvP01_10_v1_2721_-_PVP01_1031700_3	0
AMRU_Ao_GGGCACTCAGCCAATT	AMRU	Ao	4204	PvP01_10_v1_2721_-_PVP01_1031700_3	0
AMRU_Ao_GGGCACTCAGCCTATA	AMRU	Ao	3236	PvP01_10_v1_2721_-_PVP01_1031700_3	0
AMRU_Ao_GGGCACTCATGCAATC	AMRU	Ao	1884	PvP01_10_v1_2721_-_PVP01_1031700_3	0
AMRU_Ao_GGGCACTGTCCGAAGA	AMRU	Ao	4378	PvP01_10_v1_2721_-_PVP01_1031700_3	0
AMRU_Ao_GGGCACTGTTACTGAC	AMRU	Ao	5216	PvP01_10_v1_2721_-_PVP01_1031700_3	0.0967118
AMRU_Ao_GGGCACTGTTCCACAA	AMRU	Ao	7646	PvP01_10_v1_2721_-_PVP01_1031700_3	0
AMRU_Ao_GGGCATCAGAGACGAA	AMRU	Ao	5907	PvP01_10_v1_2721_-_PVP01_1031700_3	0
AMRU_Ao_GGGCATCAGCACAGGT	AMRU	Ao	6263	PvP01_10_v1_2721_-_PVP01_1031700_3	0.0463499
AMRU_Ao_GGGCATCCAAGCCGTC	AMRU	Ao	4279	PvP01_10_v1_2721_-_PVP01_1031700_3	0
AMRU_Ao_GGGCATCGTACGCTGC	AMRU	Ao	7233	PvP01_10_v1_2721_-_PVP01_1031700_3	0
AMRU_Ao_GGGCATCGTATCTGCA	AMRU	Ao	8928	PvP01_10_v1_2721_-_PVP01_1031700_3	0
AMRU_Ao_GGGCATCTCCGCGGTA	AMRU	Ao	9074	PvP01_10_v1_2721_-_PVP01_1031700_3	0
AMRU_Ao_GGGTCTGGTAGCTCCG	AMRU	Ao	1650	PvP01_10_v1_2721_-_PVP01_1031700_3	0
AMRU_Ao_GGGTCTGGTCTCAACA	AMRU	Ao	5183	PvP01_10_v1_2721_-_PVP01_1031700_3	0
AMRU_Ao_GGGTCTGTCAGCGATT	AMRU	Ao	8634	PvP01_10_v1_2721_-_PVP01_1031700_3	0.0416493
AMRU_Ao_GGGTTGCTCCGTCAAA	AMRU	Ao	1221	PvP01_10_v1_2721_-_PVP01_1031700_3	0
AMRU_Ao_GGTATTGCACCTGGTG	AMRU	Ao	3701	PvP01_10_v1_2721_-_PVP01_1031700_3	0
AMRU_Ao_GGTGAAGAGTGTCTCA	AMRU	Ao	5497	PvP01_10_v1_2721_-_PVP01_1031700_3	0
AMRU_Ao_GGTGAAGGTCAGCTAT	AMRU	Ao	3291	PvP01_10_v1_2721_-_PVP01_1031700_3	0
AMRU_Ao_GGTGAAGGTGCTCTTC	AMRU	Ao	5410	PvP01_10_v1_2721_-_PVP01_1031700_3	0
AMRU_Ao_GGTGAAGTCTGCTTGC	AMRU	Ao	4601	PvP01_10_v1_2721_-_PVP01_1031700_3	0.066507
AMRU_Ao_GGTGCGTAGAGAGCTC	AMRU	Ao	3936	PvP01_10_v1_2721_-_PVP01_1031700_3	0
AMRU_Ao_GGTGCGTCAACACCCG	AMRU	Ao	8136	PvP01_10_v1_2721_-_PVP01_1031700_3	0
AMRU_Ao_GGTGCGTTCGAATCCA	AMRU	Ao	1063	PvP01_10_v1_2721_-_PVP01_1031700_3	0
AMRU_Ao_GGTGTTAAGCGACGTA	AMRU	Ao	5219	PvP01_10_v1_2721_-_PVP01_1031700_3	0.035841
AMRU_Ao_GGTGTTAAGTGGTCCC	AMRU	Ao	4753	PvP01_10_v1_2721_-_PVP01_1031700_3	0
AMRU_Ao_GGTGTTATCTCACATT	AMRU	Ao	5156	PvP01_10_v1_2721_-_PVP01_1031700_3	0.127226
AMRU_Ao_GTAACGTCATATGAGA	AMRU	Ao	4151	PvP01_10_v1_2721_-_PVP01_1031700_3	0
AMRU_Ao_GTAACGTGTATTAGCC	AMRU	Ao	8873	PvP01_10_v1_2721_-_PVP01_1031700_3	0
AMRU_Ao_GTAACGTGTCCTCTTG	AMRU	Ao	2109	PvP01_10_v1_2721_-_PVP01_1031700_3	0
AMRU_Ao_GTAACGTGTGGTGTAG	AMRU	Ao	4523	PvP01_10_v1_2721_-_PVP01_1031700_3	0
AMRU_Ao_GTAACTGCAACAACCT	AMRU	Ao	2146	PvP01_10_v1_2721_-_PVP01_1031700_3	0
AMRU_Ao_GTAACTGTCTCTAAGG	AMRU	Ao	3672	PvP01_10_v1_2721_-_PVP01_1031700_3	0
AMRU_Ao_GTAACTGTCTTACCTA	AMRU	Ao	2986	PvP01_10_v1_2721_-_PVP01_1031700_3	0
AMRU_Ao_GTACGTAAGTGAACGC	AMRU	Ao	3835	PvP01_10_v1_2721_-_PVP01_1031700_3	0
AMRU_Ao_GTACGTACATCAGTCA	AMRU	Ao	520	PvP01_10_v1_2721_-_PVP01_1031700_3	0
AMRU_Ao_GTACGTAGTCATACTG	AMRU	Ao	5124	PvP01_10_v1_2721_-_PVP01_1031700_3	0
AMRU_Ao_GTACTCCGTAAATACG	AMRU	Ao	9070	PvP01_10_v1_2721_-_PVP01_1031700_3	0
AMRU_Ao_GTACTCCTCAGGCCCA	AMRU	Ao	3968	PvP01_10_v1_2721_-_PVP01_1031700_3	0
AMRU_Ao_GTACTTTCACAACGTT	AMRU	Ao	8318	PvP01_10_v1_2721_-_PVP01_1031700_3	0
AMRU_Ao_GTACTTTGTACCGTAT	AMRU	Ao	5613	PvP01_10_v1_2721_-_PVP01_1031700_3	0.128609
AMRU_Ao_GTACTTTGTATATGGA	AMRU	Ao	3921	PvP01_10_v1_2721_-_PVP01_1031700_3	0.057277
AMRU_Ao_GTACTTTGTGTGCCTG	AMRU	Ao	4451	PvP01_10_v1_2721_-_PVP01_1031700_3	0
AMRU_Ao_GTACTTTTCATCTGCC	AMRU	Ao	7871	PvP01_10_v1_2721_-_PVP01_1031700_3	0
AMRU_Ao_GTACTTTTCGGCGCTA	AMRU	Ao	8656	PvP01_10_v1_2721_-_PVP01_1031700_3	0
AMRU_Ao_GTAGGCCAGTCGTACT	AMRU	Ao	5245	PvP01_10_v1_2721_-_PVP01_1031700_3	0
AMRU_Ao_GTAGGCCCACTAAGTC	AMRU	Ao	4952	PvP01_10_v1_2721_-_PVP01_1031700_3	0
AMRU_Ao_GTAGGCCCAGCCTATA	AMRU	Ao	3977	PvP01_10_v1_2721_-_PVP01_1031700_3	0
AMRU_Ao_GTAGGCCCAGCTGGCT	AMRU	Ao	4333	PvP01_10_v1_2721_-_PVP01_1031700_3	0
AMRU_Ao_GTAGGCCGTTCCATGA	AMRU	Ao	4259	PvP01_10_v1_2721_-_PVP01_1031700_3	0
AMRU_Ao_GTAGGCCTCACTCCTG	AMRU	Ao	1534	PvP01_10_v1_2721_-_PVP01_1031700_3	0
AMRU_Ao_GTAGGCCTCCAGGGCT	AMRU	Ao	5274	PvP01_10_v1_2721_-_PVP01_1031700_3	0
AMRU_Ao_GTAGTCAAGGCCCTCA	AMRU	Ao	8222	PvP01_10_v1_2721_-_PVP01_1031700_3	0
AMRU_Ao_GTAGTCATCAACCAAC	AMRU	Ao	131	PvP01_10_v1_2721_-_PVP01_1031700_3	0
AMRU_Ao_GTAGTCATCCTTTCTC	AMRU	Ao	8688	PvP01_10_v1_2721_-_PVP01_1031700_3	0
AMRU_Ao_GTATCTTAGCCAGTAG	AMRU	Ao	4034	PvP01_10_v1_2721_-_PVP01_1031700_3	0
AMRU_Ao_GTATCTTAGGGTATCG	AMRU	Ao	4237	PvP01_10_v1_2721_-_PVP01_1031700_3	0
AMRU_Ao_GTATCTTTCAGTCAGT	AMRU	Ao	3252	PvP01_10_v1_2721_-_PVP01_1031700_3	0
AMRU_Ao_GTATCTTTCGCATGAT	AMRU	Ao	1229	PvP01_10_v1_2721_-_PVP01_1031700_3	0
AMRU_Ao_GTCAAGTAGGATCGCA	AMRU	Ao	4463	PvP01_10_v1_2721_-_PVP01_1031700_3	0.156323
AMRU_Ao_GTCAAGTCACGAGAGT	AMRU	Ao	2285	PvP01_10_v1_2721_-_PVP01_1031700_3	0
AMRU_Ao_GTCAAGTCAGATCGGA	AMRU	Ao	3915	PvP01_10_v1_2721_-_PVP01_1031700_3	0
AMRU_Ao_GTCACAAAGCTCCTTC	AMRU	Ao	3796	PvP01_10_v1_2721_-_PVP01_1031700_3	0.0525348
AMRU_Ao_GTCACAACAGGTTTCA	AMRU	Ao	4660	PvP01_10_v1_2721_-_PVP01_1031700_3	0
AMRU_Ao_GTCACAATCTCCCTGA	AMRU	Ao	64	PvP01_10_v1_2721_-_PVP01_1031700_3	0
AMRU_Ao_GTCACGGCAAAGTCAA	AMRU	Ao	5273	PvP01_10_v1_2721_-_PVP01_1031700_3	0
AMRU_Ao_GTCATTTAGCGTAGTG	AMRU	Ao	3110	PvP01_10_v1_2721_-_PVP01_1031700_3	0
AMRU_Ao_GTCATTTAGGCCATAG	AMRU	Ao	5275	PvP01_10_v1_2721_-_PVP01_1031700_3	0.0556297
AMRU_Ao_GTCATTTCAGTCGTGC	AMRU	Ao	5532	PvP01_10_v1_2721_-_PVP01_1031700_3	0
AMRU_Ao_GTCATTTCATCCGGGT	AMRU	Ao	4422	PvP01_10_v1_2721_-_PVP01_1031700_3	0
AMRU_Ao_GTCATTTTCTTATCTG	AMRU	Ao	4269	PvP01_10_v1_2721_-_PVP01_1031700_3	0
AMRU_Ao_GTCCTCAAGACATAAC	AMRU	Ao	78	PvP01_10_v1_2721_-_PVP01_1031700_3	0
AMRU_Ao_GTCCTCAAGCTAACTC	AMRU	Ao	1797	PvP01_10_v1_2721_-_PVP01_1031700_3	0
AMRU_Ao_GTCCTCACATGTTCCC	AMRU	Ao	5125	PvP01_10_v1_2721_-_PVP01_1031700_3	0.15015
AMRU_Ao_GTCCTCATCGTGGTCG	AMRU	Ao	4264	PvP01_10_v1_2721_-_PVP01_1031700_3	0
AMRU_Ao_GTCCTCATCTTCATGT	AMRU	Ao	3228	PvP01_10_v1_2721_-_PVP01_1031700_3	0
AMRU_Ao_GTCGGGTGTACTTGAC	AMRU	Ao	4881	PvP01_10_v1_2721_-_PVP01_1031700_3	0
AMRU_Ao_GTCGGGTGTTCGGCAC	AMRU	Ao	5064	PvP01_10_v1_2721_-_PVP01_1031700_3	0
AMRU_Ao_GTCGTAACACATGACT	AMRU	Ao	4194	PvP01_10_v1_2721_-_PVP01_1031700_3	0
AMRU_Ao_GTCGTAACAGAGTGTG	AMRU	Ao	4202	PvP01_10_v1_2721_-_PVP01_1031700_3	0
AMRU_Ao_GTCTCGTAGCGATGAC	AMRU	Ao	8659	PvP01_10_v1_2721_-_PVP01_1031700_3	0
AMRU_Ao_GTCTCGTCATTGGCGC	AMRU	Ao	3198	PvP01_10_v1_2721_-_PVP01_1031700_3	0
AMRU_Ao_GTCTCGTGTGGGTATG	AMRU	Ao	4317	PvP01_10_v1_2721_-_PVP01_1031700_3	0
AMRU_Ao_GTCTCGTGTTTGTGTG	AMRU	Ao	3614	PvP01_10_v1_2721_-_PVP01_1031700_3	0
AMRU_Ao_GTCTTCGCAATGACCT	AMRU	Ao	4509	PvP01_10_v1_2721_-_PVP01_1031700_3	0
AMRU_Ao_GTGAAGGAGCAATCTC	AMRU	Ao	4001	PvP01_10_v1_2721_-_PVP01_1031700_3	0
AMRU_Ao_GTGAAGGAGCTAGTCT	AMRU	Ao	6865	PvP01_10_v1_2721_-_PVP01_1031700_3	0
AMRU_Ao_GTGAAGGAGGCATGGT	AMRU	Ao	1482	PvP01_10_v1_2721_-_PVP01_1031700_3	0
AMRU_Ao_GTGAAGGCACAGATTC	AMRU	Ao	4153	PvP01_10_v1_2721_-_PVP01_1031700_3	0
AMRU_Ao_GTGCAGCAGTGGGCTA	AMRU	Ao	6034	PvP01_10_v1_2721_-_PVP01_1031700_3	0
AMRU_Ao_GTGCAGCGTGCTGTAT	AMRU	Ao	3548	PvP01_10_v1_2721_-_PVP01_1031700_3	0
AMRU_Ao_GTGCATAAGAGCTTCT	AMRU	Ao	4780	PvP01_10_v1_2721_-_PVP01_1031700_3	0.0276243
AMRU_Ao_GTGCATACAAGCCATT	AMRU	Ao	3693	PvP01_10_v1_2721_-_PVP01_1031700_3	0
AMRU_Ao_GTGCATACAATGAATG	AMRU	Ao	5571	PvP01_10_v1_2721_-_PVP01_1031700_3	0.140027
AMRU_Ao_GTGCATACAGCTGCTG	AMRU	Ao	8843	PvP01_10_v1_2721_-_PVP01_1031700_3	0
AMRU_Ao_GTGCATATCAATAAGG	AMRU	Ao	2697	PvP01_10_v1_2721_-_PVP01_1031700_3	0
AMRU_Ao_GTGCGGTAGCGTCTAT	AMRU	Ao	3032	PvP01_10_v1_2721_-_PVP01_1031700_3	0
AMRU_Ao_GTGCGGTCAGATTGCT	AMRU	Ao	4490	PvP01_10_v1_2721_-_PVP01_1031700_3	0
AMRU_Ao_GTGCGGTGTAAGAGGA	AMRU	Ao	4216	PvP01_10_v1_2721_-_PVP01_1031700_3	0
AMRU_Ao_GTGCGGTTCAGCTGGC	AMRU	Ao	5587	PvP01_10_v1_2721_-_PVP01_1031700_3	0.0318238
AMRU_Ao_GTGCTTCCACCGATAT	AMRU	Ao	2202	PvP01_10_v1_2721_-_PVP01_1031700_3	0
AMRU_Ao_GTGCTTCCAGCTATTG	AMRU	Ao	2394	PvP01_10_v1_2721_-_PVP01_1031700_3	0
AMRU_Ao_GTGCTTCCATCCAACA	AMRU	Ao	3929	PvP01_10_v1_2721_-_PVP01_1031700_3	0
AMRU_Ao_GTGCTTCCATTAGCCA	AMRU	Ao	7316	PvP01_10_v1_2721_-_PVP01_1031700_3	0
AMRU_Ao_GTGCTTCGTAATCACC	AMRU	Ao	4474	PvP01_10_v1_2721_-_PVP01_1031700_3	0
AMRU_Ao_GTGGGTCCACATAACC	AMRU	Ao	8549	PvP01_10_v1_2721_-_PVP01_1031700_3	0.0209736
AMRU_Ao_GTGGGTCCACATGTGT	AMRU	Ao	7073	PvP01_10_v1_2721_-_PVP01_1031700_3	0
AMRU_Ao_GTGGGTCCACGACTCG	AMRU	Ao	4211	PvP01_10_v1_2721_-_PVP01_1031700_3	0
AMRU_Ao_GTGGGTCCATTTCAGG	AMRU	Ao	4884	PvP01_10_v1_2721_-_PVP01_1031700_3	0
AMRU_Ao_GTGGGTCGTAAGGGCT	AMRU	Ao	8800	PvP01_10_v1_2721_-_PVP01_1031700_3	0
AMRU_Ao_GTGGGTCTCTGCTGCT	AMRU	Ao	4014	PvP01_10_v1_2721_-_PVP01_1031700_3	0
AMRU_Ao_GTGTGCGGTCTCTTTA	AMRU	Ao	8547	PvP01_10_v1_2721_-_PVP01_1031700_3	0.0292005
AMRU_Ao_GTGTGCGGTGTTTGGT	AMRU	Ao	4233	PvP01_10_v1_2721_-_PVP01_1031700_3	0
AMRU_Ao_GTGTTAGAGCGGATCA	AMRU	Ao	4305	PvP01_10_v1_2721_-_PVP01_1031700_3	0.0618812
AMRU_Ao_GTGTTAGCACCAACCG	AMRU	Ao	5668	PvP01_10_v1_2721_-_PVP01_1031700_3	0.0575639
AMRU_Ao_GTTAAGCAGGACTGGT	AMRU	Ao	1290	PvP01_10_v1_2721_-_PVP01_1031700_3	0
AMRU_Ao_GTTAAGCGTGACTACT	AMRU	Ao	5678	PvP01_10_v1_2721_-_PVP01_1031700_3	0.0891862
AMRU_Ao_GTTAAGCTCTGATACG	AMRU	Ao	4405	PvP01_10_v1_2721_-_PVP01_1031700_3	0
AMRU_Ao_GTTACAGAGCTAGCCC	AMRU	Ao	2418	PvP01_10_v1_2721_-_PVP01_1031700_3	0
AMRU_Ao_GTTACAGAGGGTTCCC	AMRU	Ao	4650	PvP01_10_v1_2721_-_PVP01_1031700_3	0
AMRU_Ao_GTTACAGCAGCTGCAC	AMRU	Ao	5418	PvP01_10_v1_2721_-_PVP01_1031700_3	0
AMRU_Ao_GTTACAGGTGCCTGCA	AMRU	Ao	7856	PvP01_10_v1_2721_-_PVP01_1031700_3	0
AMRU_Ao_GTTACAGTCCACGTTC	AMRU	Ao	8271	PvP01_10_v1_2721_-_PVP01_1031700_3	0
AMRU_Ao_GTTACAGTCTTAGAGC	AMRU	Ao	4007	PvP01_10_v1_2721_-_PVP01_1031700_3	0
AMRU_Ao_GTTCATTAGACTAGGC	AMRU	Ao	3623	PvP01_10_v1_2721_-_PVP01_1031700_3	0
AMRU_Ao_GTTCATTAGTCGATAA	AMRU	Ao	1416	PvP01_10_v1_2721_-_PVP01_1031700_3	0
AMRU_Ao_GTTCATTCAAACTGTC	AMRU	Ao	1578	PvP01_10_v1_2721_-_PVP01_1031700_3	0
AMRU_Ao_GTTCATTGTCTCTTAT	AMRU	Ao	1350	PvP01_10_v1_2721_-_PVP01_1031700_3	0.0935891
AMRU_Ao_GTTCATTTCGAATGCT	AMRU	Ao	4586	PvP01_10_v1_2721_-_PVP01_1031700_3	0
AMRU_Ao_GTTCATTTCTGCAAGT	AMRU	Ao	3899	PvP01_10_v1_2721_-_PVP01_1031700_3	0.0901551
AMRU_Ao_GTTCGGGAGCTATGCT	AMRU	Ao	3700	PvP01_10_v1_2721_-_PVP01_1031700_3	0
AMRU_Ao_GTTCGGGGTTGGGACA	AMRU	Ao	4732	PvP01_10_v1_2721_-_PVP01_1031700_3	0
AMRU_Ao_GTTCTCGAGGGTTCCC	AMRU	Ao	2314	PvP01_10_v1_2721_-_PVP01_1031700_3	0
AMRU_Ao_GTTCTCGCACCATCCT	AMRU	Ao	3533	PvP01_10_v1_2721_-_PVP01_1031700_3	0
AMRU_Ao_GTTCTCGGTCGACTAT	AMRU	Ao	1651	PvP01_10_v1_2721_-_PVP01_1031700_3	0
AMRU_Ao_GTTCTCGTCATCGCTC	AMRU	Ao	4235	PvP01_10_v1_2721_-_PVP01_1031700_3	0
AMRU_Ao_GTTTCTAAGCCCGAAA	AMRU	Ao	4687	PvP01_10_v1_2721_-_PVP01_1031700_3	0
AMRU_Ao_GTTTCTAAGTATCGAA	AMRU	Ao	1921	PvP01_10_v1_2721_-_PVP01_1031700_3	0
AMRU_Ao_GTTTCTAGTCCGAAGA	AMRU	Ao	3300	PvP01_10_v1_2721_-_PVP01_1031700_3	0
AMRU_Ao_GTTTCTATCGGCGGTT	AMRU	Ao	8116	PvP01_10_v1_2721_-_PVP01_1031700_3	0
AMRU_Ao_TAAACCGCAGCTGTGC	AMRU	Ao	8885	PvP01_10_v1_2721_-_PVP01_1031700_3	0
AMRU_Ao_TAAACCGCATTGAGCT	AMRU	Ao	5201	PvP01_10_v1_2721_-_PVP01_1031700_3	0.0439155
AMRU_Ao_TAAACCGGTACAGTGG	AMRU	Ao	2693	PvP01_10_v1_2721_-_PVP01_1031700_3	0
AMRU_Ao_TAAACCGGTTCACGGC	AMRU	Ao	2040	PvP01_10_v1_2721_-_PVP01_1031700_3	0
AMRU_Ao_TAAACCGTCGATGAGG	AMRU	Ao	8573	PvP01_10_v1_2721_-_PVP01_1031700_3	0
AMRU_Ao_TAAACCGTCGTACCGG	AMRU	Ao	4960	PvP01_10_v1_2721_-_PVP01_1031700_3	0.0845809
AMRU_Ao_TAAACCGTCTAAGCCA	AMRU	Ao	7294	PvP01_10_v1_2721_-_PVP01_1031700_3	0
AMRU_Ao_TAAGAGACAACAACCT	AMRU	Ao	4967	PvP01_10_v1_2721_-_PVP01_1031700_3	0
AMRU_Ao_TAAGAGACAATAACGA	AMRU	Ao	8097	PvP01_10_v1_2721_-_PVP01_1031700_3	0
AMRU_Ao_TAAGAGACATTTGCCC	AMRU	Ao	5446	PvP01_10_v1_2721_-_PVP01_1031700_3	0
AMRU_Ao_TAAGAGATCCTAGGGC	AMRU	Ao	1319	PvP01_10_v1_2721_-_PVP01_1031700_3	0
AMRU_Ao_TAAGCGTCAGCCAGAA	AMRU	Ao	4208	PvP01_10_v1_2721_-_PVP01_1031700_3	0
AMRU_Ao_TAAGCGTGTCGGCTCA	AMRU	Ao	7868	PvP01_10_v1_2721_-_PVP01_1031700_3	0
AMRU_Ao_TAAGTGCAGGTTACCT	AMRU	Ao	5369	PvP01_10_v1_2721_-_PVP01_1031700_3	0
AMRU_Ao_TAAGTGCAGTGAACGC	AMRU	Ao	3529	PvP01_10_v1_2721_-_PVP01_1031700_3	0
AMRU_Ao_TAAGTGCTCAGAGCTT	AMRU	Ao	725	PvP01_10_v1_2721_-_PVP01_1031700_3	0
AMRU_Ao_TAAGTGCTCCCTGACT	AMRU	Ao	1575	PvP01_10_v1_2721_-_PVP01_1031700_3	0
AMRU_Ao_TACACGACACCAGCAC	AMRU	Ao	1621	PvP01_10_v1_2721_-_PVP01_1031700_3	0
AMRU_Ao_TACAGTGAGAAACGAG	AMRU	Ao	5331	PvP01_10_v1_2721_-_PVP01_1031700_3	0
AMRU_Ao_TACAGTGTCCTCATTA	AMRU	Ao	2293	PvP01_10_v1_2721_-_PVP01_1031700_3	0
AMRU_Ao_TACAGTGTCCTGCAGG	AMRU	Ao	1485	PvP01_10_v1_2721_-_PVP01_1031700_3	0
AMRU_Ao_TACCTATAGAGTTGGC	AMRU	Ao	8603	PvP01_10_v1_2721_-_PVP01_1031700_3	0
AMRU_Ao_TACCTTAAGCTCCTCT	AMRU	Ao	7480	PvP01_10_v1_2721_-_PVP01_1031700_3	0
AMRU_Ao_TACCTTACAAATTGCC	AMRU	Ao	6641	PvP01_10_v1_2721_-_PVP01_1031700_3	0
AMRU_Ao_TACCTTATCAGCACAT	AMRU	Ao	3638	PvP01_10_v1_2721_-_PVP01_1031700_3	0
AMRU_Ao_TACCTTATCTGCCAGG	AMRU	Ao	8303	PvP01_10_v1_2721_-_PVP01_1031700_3	0
AMRU_Ao_TACGGATAGTGCCAGA	AMRU	Ao	7991	PvP01_10_v1_2721_-_PVP01_1031700_3	0
AMRU_Ao_TACGGATCAGTTCCCT	AMRU	Ao	5072	PvP01_10_v1_2721_-_PVP01_1031700_3	0
AMRU_Ao_TACGGATGTTTGACAC	AMRU	Ao	8684	PvP01_10_v1_2721_-_PVP01_1031700_3	0
AMRU_Ao_TACGGATTCACCGTAA	AMRU	Ao	4811	PvP01_10_v1_2721_-_PVP01_1031700_3	0
AMRU_Ao_TACGGGCAGCGATAGC	AMRU	Ao	4118	PvP01_10_v1_2721_-_PVP01_1031700_3	0.0374392
AMRU_Ao_TACGGGCCAAGGACAC	AMRU	Ao	2512	PvP01_10_v1_2721_-_PVP01_1031700_3	0
AMRU_Ao_TACGGGCCACTGAAGG	AMRU	Ao	6409	PvP01_10_v1_2721_-_PVP01_1031700_3	0.0467202
AMRU_Ao_TACGGGCGTCGTCTTC	AMRU	Ao	8951	PvP01_10_v1_2721_-_PVP01_1031700_3	0
AMRU_Ao_TACGGGCGTGCAGACA	AMRU	Ao	3580	PvP01_10_v1_2721_-_PVP01_1031700_3	0
AMRU_Ao_TACGGGCGTTGTACAC	AMRU	Ao	2770	PvP01_10_v1_2721_-_PVP01_1031700_3	0
AMRU_Ao_TACGGTAAGAGGGCTT	AMRU	Ao	3067	PvP01_10_v1_2721_-_PVP01_1031700_3	0
AMRU_Ao_TACGGTAAGGTGCTAG	AMRU	Ao	2221	PvP01_10_v1_2721_-_PVP01_1031700_3	0
AMRU_Ao_TACGGTAAGTGTCCAT	AMRU	Ao	5675	PvP01_10_v1_2721_-_PVP01_1031700_3	0.0452141
AMRU_Ao_TACGGTATCATGCTCC	AMRU	Ao	6672	PvP01_10_v1_2721_-_PVP01_1031700_3	0
AMRU_Ao_TACTCATAGTGGAGAA	AMRU	Ao	5212	PvP01_10_v1_2721_-_PVP01_1031700_3	0
AMRU_Ao_TACTCATGTGCAGGTA	AMRU	Ao	8371	PvP01_10_v1_2721_-_PVP01_1031700_3	0
AMRU_Ao_TACTCGCGTCCAGTGC	AMRU	Ao	8859	PvP01_10_v1_2721_-_PVP01_1031700_3	0
AMRU_Ao_TACTCGCTCGATAGAA	AMRU	Ao	7296	PvP01_10_v1_2721_-_PVP01_1031700_3	0
AMRU_Ao_TACTCGCTCGGAAACG	AMRU	Ao	4840	PvP01_10_v1_2721_-_PVP01_1031700_3	0
AMRU_Ao_TACTTACGTCATCCCT	AMRU	Ao	266	PvP01_10_v1_2721_-_PVP01_1031700_3	0
AMRU_Ao_TACTTGTAGGCCGAAT	AMRU	Ao	5276	PvP01_10_v1_2721_-_PVP01_1031700_3	0
AMRU_Ao_TACTTGTAGTGGTAGC	AMRU	Ao	2959	PvP01_10_v1_2721_-_PVP01_1031700_3	0
AMRU_Ao_TACTTGTGTAAAGGAG	AMRU	Ao	3097	PvP01_10_v1_2721_-_PVP01_1031700_3	0
AMRU_Ao_TACTTGTGTCCGTTAA	AMRU	Ao	3739	PvP01_10_v1_2721_-_PVP01_1031700_3	0
AMRU_Ao_TACTTGTTCACCTTAT	AMRU	Ao	4236	PvP01_10_v1_2721_-_PVP01_1031700_3	0
AMRU_Ao_TAGACCACAATTCCTT	AMRU	Ao	1459	PvP01_10_v1_2721_-_PVP01_1031700_3	0
AMRU_Ao_TAGAGCTGTCGAAAGC	AMRU	Ao	7130	PvP01_10_v1_2721_-_PVP01_1031700_3	0
AMRU_Ao_TAGAGCTGTCTCTTTA	AMRU	Ao	2665	PvP01_10_v1_2721_-_PVP01_1031700_3	0
AMRU_Ao_TAGCCGGAGCGTTGCC	AMRU	Ao	7684	PvP01_10_v1_2721_-_PVP01_1031700_3	0
AMRU_Ao_TAGCCGGAGTACACCT	AMRU	Ao	3027	PvP01_10_v1_2721_-_PVP01_1031700_3	0
AMRU_Ao_TAGCCGGGTAGCTTGT	AMRU	Ao	4763	PvP01_10_v1_2721_-_PVP01_1031700_3	0
AMRU_Ao_TAGCCGGGTCATCCCT	AMRU	Ao	5696	PvP01_10_v1_2721_-_PVP01_1031700_3	0
AMRU_Ao_TAGCCGGGTTTGTGTG	AMRU	Ao	3934	PvP01_10_v1_2721_-_PVP01_1031700_3	0.0493705
AMRU_Ao_TAGCCGGTCATAGCAC	AMRU	Ao	3526	PvP01_10_v1_2721_-_PVP01_1031700_3	0
AMRU_Ao_TAGCCGGTCCTTGCCA	AMRU	Ao	5100	PvP01_10_v1_2721_-_PVP01_1031700_3	0
AMRU_Ao_TAGGCATAGCGGATCA	AMRU	Ao	4785	PvP01_10_v1_2721_-_PVP01_1031700_3	0.136818
AMRU_Ao_TAGGCATGTAGCTTGT	AMRU	Ao	4645	PvP01_10_v1_2721_-_PVP01_1031700_3	0.0425931
AMRU_Ao_TAGTGGTAGGGCTTCC	AMRU	Ao	3410	PvP01_10_v1_2721_-_PVP01_1031700_3	0
AMRU_Ao_TAGTGGTGTTAGGGTG	AMRU	Ao	2743	PvP01_10_v1_2721_-_PVP01_1031700_3	0.0859254
AMRU_Ao_TAGTGGTTCGAATCCA	AMRU	Ao	3141	PvP01_10_v1_2721_-_PVP01_1031700_3	0
AMRU_Ao_TAGTTGGGTTGTCGCG	AMRU	Ao	3667	PvP01_10_v1_2721_-_PVP01_1031700_3	0
AMRU_Ao_TAGTTGGTCTCGCTTG	AMRU	Ao	4394	PvP01_10_v1_2721_-_PVP01_1031700_3	0
AMRU_Ao_TATCAGGAGTCGTACT	AMRU	Ao	3320	PvP01_10_v1_2721_-_PVP01_1031700_3	0
AMRU_Ao_TATCAGGCAGTCGATT	AMRU	Ao	2191	PvP01_10_v1_2721_-_PVP01_1031700_3	0
AMRU_Ao_TATCAGGGTATGGTTC	AMRU	Ao	8888	PvP01_10_v1_2721_-_PVP01_1031700_3	0
AMRU_Ao_TATCAGGGTCTCCCTA	AMRU	Ao	3279	PvP01_10_v1_2721_-_PVP01_1031700_3	0.0580552
AMRU_Ao_TATCTCAAGGTGGGTT	AMRU	Ao	5644	PvP01_10_v1_2721_-_PVP01_1031700_3	0
AMRU_Ao_TATCTCACAAAGGAAG	AMRU	Ao	3920	PvP01_10_v1_2721_-_PVP01_1031700_3	0
AMRU_Ao_TATCTCACACAGCGTC	AMRU	Ao	5092	PvP01_10_v1_2721_-_PVP01_1031700_3	0
AMRU_Ao_TATCTCACAGTGGGAT	AMRU	Ao	7893	PvP01_10_v1_2721_-_PVP01_1031700_3	0
AMRU_Ao_TATCTCAGTCGCGGTT	AMRU	Ao	2471	PvP01_10_v1_2721_-_PVP01_1031700_3	0
AMRU_Ao_TATGCCCAGTGTACGG	AMRU	Ao	8750	PvP01_10_v1_2721_-_PVP01_1031700_3	0.0243214
AMRU_Ao_TATGCCCCACTTACGA	AMRU	Ao	6432	PvP01_10_v1_2721_-_PVP01_1031700_3	0
AMRU_Ao_TATGCCCTCAACACGT	AMRU	Ao	35	PvP01_10_v1_2721_-_PVP01_1031700_3	0
AMRU_Ao_TATTACCCAAGTCTAC	AMRU	Ao	4844	PvP01_10_v1_2721_-_PVP01_1031700_3	0
AMRU_Ao_TCAACGAAGTCCTCCT	AMRU	Ao	3681	PvP01_10_v1_2721_-_PVP01_1031700_3	0.0531067
AMRU_Ao_TCAACGATCCCGACTT	AMRU	Ao	4737	PvP01_10_v1_2721_-_PVP01_1031700_3	0
AMRU_Ao_TCAACGATCTTTAGTC	AMRU	Ao	2455	PvP01_10_v1_2721_-_PVP01_1031700_3	0
AMRU_Ao_TCAATCTCACCGTTGG	AMRU	Ao	3395	PvP01_10_v1_2721_-_PVP01_1031700_3	0
AMRU_Ao_TCAATCTCAGACAGGT	AMRU	Ao	4310	PvP01_10_v1_2721_-_PVP01_1031700_3	0.0520021
AMRU_Ao_TCAATCTCATCCCATC	AMRU	Ao	2556	PvP01_10_v1_2721_-_PVP01_1031700_3	0
AMRU_Ao_TCAATCTTCTATCGCC	AMRU	Ao	5491	PvP01_10_v1_2721_-_PVP01_1031700_3	0.0790389
AMRU_Ao_TCAATCTTCTGGTTCC	AMRU	Ao	3488	PvP01_10_v1_2721_-_PVP01_1031700_3	0
AMRU_Ao_TCACAAGCATCAGTCA	AMRU	Ao	3675	PvP01_10_v1_2721_-_PVP01_1031700_3	0
AMRU_Ao_TCACAAGGTAGCTTGT	AMRU	Ao	8134	PvP01_10_v1_2721_-_PVP01_1031700_3	0
AMRU_Ao_TCACAAGGTTGAGTTC	AMRU	Ao	4243	PvP01_10_v1_2721_-_PVP01_1031700_3	0
AMRU_Ao_TCACAAGTCCCTTGTG	AMRU	Ao	5839	PvP01_10_v1_2721_-_PVP01_1031700_3	0.052687
AMRU_Ao_TCACAAGTCTGATACG	AMRU	Ao	4928	PvP01_10_v1_2721_-_PVP01_1031700_3	0
AMRU_Ao_TCACGAAAGTGTGAAT	AMRU	Ao	2401	PvP01_10_v1_2721_-_PVP01_1031700_3	0
AMRU_Ao_TCACGAACATTCTTAC	AMRU	Ao	5520	PvP01_10_v1_2721_-_PVP01_1031700_3	0
AMRU_Ao_TCACGAATCTTGCAAG	AMRU	Ao	8093	PvP01_10_v1_2721_-_PVP01_1031700_3	0
AMRU_Ao_TCAGATGGTAGAGCTG	AMRU	Ao	4291	PvP01_10_v1_2721_-_PVP01_1031700_3	0
AMRU_Ao_TCAGATGTCTTCGAGA	AMRU	Ao	5218	PvP01_10_v1_2721_-_PVP01_1031700_3	0.189143
AMRU_Ao_TCAGCAAAGACGACGT	AMRU	Ao	7617	PvP01_10_v1_2721_-_PVP01_1031700_3	0
AMRU_Ao_TCAGCAACATACTCTT	AMRU	Ao	3984	PvP01_10_v1_2721_-_PVP01_1031700_3	0.167056
AMRU_Ao_TCAGCAAGTACTTAGC	AMRU	Ao	5630	PvP01_10_v1_2721_-_PVP01_1031700_3	0.0471587
AMRU_Ao_TCAGCTCAGACTACAA	AMRU	Ao	4691	PvP01_10_v1_2721_-_PVP01_1031700_3	0
AMRU_Ao_TCAGCTCCACGGCGTT	AMRU	Ao	3294	PvP01_10_v1_2721_-_PVP01_1031700_3	0
AMRU_Ao_TCAGCTCGTCATCGGC	AMRU	Ao	7422	PvP01_10_v1_2721_-_PVP01_1031700_3	0
AMRU_Ao_TCAGCTCGTGGTTTCA	AMRU	Ao	2754	PvP01_10_v1_2721_-_PVP01_1031700_3	0
AMRU_Ao_TCAGGATTCTGATACG	AMRU	Ao	1177	PvP01_10_v1_2721_-_PVP01_1031700_3	0
AMRU_Ao_TCAGGATTCTTCTGGC	AMRU	Ao	3391	PvP01_10_v1_2721_-_PVP01_1031700_3	0
AMRU_Ao_TCATTACGTTAGAACA	AMRU	Ao	5231	PvP01_10_v1_2721_-_PVP01_1031700_3	0
AMRU_Ao_TCATTACTCAACGAAA	AMRU	Ao	4108	PvP01_10_v1_2721_-_PVP01_1031700_3	0.0777091
AMRU_Ao_TCATTTGAGCACCGTC	AMRU	Ao	3887	PvP01_10_v1_2721_-_PVP01_1031700_3	0
AMRU_Ao_TCATTTGAGCCGGTAA	AMRU	Ao	4739	PvP01_10_v1_2721_-_PVP01_1031700_3	0
AMRU_Ao_TCATTTGAGGATGTAT	AMRU	Ao	6669	PvP01_10_v1_2721_-_PVP01_1031700_3	0
AMRU_Ao_TCCACACCAAATCCGT	AMRU	Ao	8756	PvP01_10_v1_2721_-_PVP01_1031700_3	0
AMRU_Ao_TCCACACCACGTCAGC	AMRU	Ao	3892	PvP01_10_v1_2721_-_PVP01_1031700_3	0.0573526
AMRU_Ao_TCCACACTCTGCCAGG	AMRU	Ao	2823	PvP01_10_v1_2721_-_PVP01_1031700_3	0
AMRU_Ao_TCCCGATCAAGTAGTA	AMRU	Ao	4462	PvP01_10_v1_2721_-_PVP01_1031700_3	0
AMRU_Ao_TCCCGATCATAAGACA	AMRU	Ao	1506	PvP01_10_v1_2721_-_PVP01_1031700_3	0
AMRU_Ao_TCCCGATGTACGAAAT	AMRU	Ao	8279	PvP01_10_v1_2721_-_PVP01_1031700_3	0.0182983
AMRU_Ao_TCCCGATGTCGACTGC	AMRU	Ao	1589	PvP01_10_v1_2721_-_PVP01_1031700_3	0
AMRU_Ao_TCGCGAGGTCTAAACC	AMRU	Ao	4839	PvP01_10_v1_2721_-_PVP01_1031700_3	0
AMRU_Ao_TCGCGTTAGCTAGTGG	AMRU	Ao	3489	PvP01_10_v1_2721_-_PVP01_1031700_3	0
AMRU_Ao_TCGCGTTCATCATCCC	AMRU	Ao	4133	PvP01_10_v1_2721_-_PVP01_1031700_3	0
AMRU_Ao_TCGCGTTTCAAGGCTT	AMRU	Ao	8092	PvP01_10_v1_2721_-_PVP01_1031700_3	0
AMRU_Ao_TCGGGACAGTCCCACG	AMRU	Ao	8641	PvP01_10_v1_2721_-_PVP01_1031700_3	0
AMRU_Ao_TCGGGACAGTTATCGC	AMRU	Ao	5402	PvP01_10_v1_2721_-_PVP01_1031700_3	0
AMRU_Ao_TCGGGACCAGTATAAG	AMRU	Ao	5552	PvP01_10_v1_2721_-_PVP01_1031700_3	0.110254
AMRU_Ao_TCGGGACGTCATATGC	AMRU	Ao	3891	PvP01_10_v1_2721_-_PVP01_1031700_3	0
AMRU_Ao_TCGGGACTCATCACCC	AMRU	Ao	2300	PvP01_10_v1_2721_-_PVP01_1031700_3	0
AMRU_Ao_TCGGGACTCTTAGAGC	AMRU	Ao	2706	PvP01_10_v1_2721_-_PVP01_1031700_3	0
AMRU_Ao_TCGGTAACACAGACTT	AMRU	Ao	2841	PvP01_10_v1_2721_-_PVP01_1031700_3	0
AMRU_Ao_TCGGTAAGTAAACGCG	AMRU	Ao	3058	PvP01_10_v1_2721_-_PVP01_1031700_3	0
AMRU_Ao_TCGGTAAGTCACACGC	AMRU	Ao	5414	PvP01_10_v1_2721_-_PVP01_1031700_3	0
AMRU_Ao_TCGGTAAGTTAAGGGC	AMRU	Ao	3732	PvP01_10_v1_2721_-_PVP01_1031700_3	0
AMRU_Ao_TCGTACCCAGCGTCCA	AMRU	Ao	5126	PvP01_10_v1_2721_-_PVP01_1031700_3	0
AMRU_Ao_TCGTACCCATATACCG	AMRU	Ao	1644	PvP01_10_v1_2721_-_PVP01_1031700_3	0
AMRU_Ao_TCGTACCGTTCAGTAC	AMRU	Ao	1693	PvP01_10_v1_2721_-_PVP01_1031700_3	0
AMRU_Ao_TCGTACCTCAAACAAG	AMRU	Ao	8157	PvP01_10_v1_2721_-_PVP01_1031700_3	0
AMRU_Ao_TCGTAGAGTCCAGTAT	AMRU	Ao	2078	PvP01_10_v1_2721_-_PVP01_1031700_3	0
AMRU_Ao_TCGTAGATCCGTCAAA	AMRU	Ao	1605	PvP01_10_v1_2721_-_PVP01_1031700_3	0
AMRU_Ao_TCGTAGATCGCTTGTC	AMRU	Ao	7636	PvP01_10_v1_2721_-_PVP01_1031700_3	0
AMRU_Ao_TCGTAGATCTACTATC	AMRU	Ao	6475	PvP01_10_v1_2721_-_PVP01_1031700_3	0.136444
AMRU_Ao_TCGTAGATCTTGTCAT	AMRU	Ao	3872	PvP01_10_v1_2721_-_PVP01_1031700_3	0.0350226
AMRU_Ao_TCTATTGAGGAACTGC	AMRU	Ao	5623	PvP01_10_v1_2721_-_PVP01_1031700_3	0
AMRU_Ao_TCTATTGAGTGAATTG	AMRU	Ao	4518	PvP01_10_v1_2721_-_PVP01_1031700_3	0.293055
AMRU_Ao_TCTATTGCAAATACAG	AMRU	Ao	2142	PvP01_10_v1_2721_-_PVP01_1031700_3	0
AMRU_Ao_TCTATTGCAATCGGTT	AMRU	Ao	2346	PvP01_10_v1_2721_-_PVP01_1031700_3	0
AMRU_Ao_TCTATTGCATGGTCAT	AMRU	Ao	2464	PvP01_10_v1_2721_-_PVP01_1031700_3	0
AMRU_Ao_TCTATTGGTCCGTCAG	AMRU	Ao	2554	PvP01_10_v1_2721_-_PVP01_1031700_3	0
AMRU_Ao_TCTATTGGTCTGCAAT	AMRU	Ao	3846	PvP01_10_v1_2721_-_PVP01_1031700_3	0
AMRU_Ao_TCTATTGGTTCACCTC	AMRU	Ao	2042	PvP01_10_v1_2721_-_PVP01_1031700_3	0
AMRU_Ao_TCTATTGTCTCCAGGG	AMRU	Ao	4267	PvP01_10_v1_2721_-_PVP01_1031700_3	0.0882223
AMRU_Ao_TCTATTGTCTCGTTTA	AMRU	Ao	9068	PvP01_10_v1_2721_-_PVP01_1031700_3	0
AMRU_Ao_TCTCATACAGTCGTGC	AMRU	Ao	1720	PvP01_10_v1_2721_-_PVP01_1031700_3	0
AMRU_Ao_TCTCATAGTTTGGGCC	AMRU	Ao	4531	PvP01_10_v1_2721_-_PVP01_1031700_3	0.158529
AMRU_Ao_TCTCATATCTAACGGT	AMRU	Ao	2257	PvP01_10_v1_2721_-_PVP01_1031700_3	0
AMRU_Ao_TCTCTAAAGTCATGCT	AMRU	Ao	5132	PvP01_10_v1_2721_-_PVP01_1031700_3	0
AMRU_Ao_TCTGAGAGTGACGCCT	AMRU	Ao	8160	PvP01_10_v1_2721_-_PVP01_1031700_3	0
AMRU_Ao_TCTGAGATCATAAAGG	AMRU	Ao	4713	PvP01_10_v1_2721_-_PVP01_1031700_3	0
AMRU_Ao_TCTGGAAAGCGTAGTG	AMRU	Ao	6907	PvP01_10_v1_2721_-_PVP01_1031700_3	0
AMRU_Ao_TCTGGAAGTCTGGTCG	AMRU	Ao	2322	PvP01_10_v1_2721_-_PVP01_1031700_3	0.0659109
AMRU_Ao_TCTTCGGAGCGATATA	AMRU	Ao	7920	PvP01_10_v1_2721_-_PVP01_1031700_3	0
AMRU_Ao_TCTTCGGAGCTATGCT	AMRU	Ao	9164	PvP01_10_v1_2721_-_PVP01_1031700_3	0
AMRU_Ao_TCTTCGGCATGAGCGA	AMRU	Ao	4898	PvP01_10_v1_2721_-_PVP01_1031700_3	0
AMRU_Ao_TCTTCGGTCAACCAAC	AMRU	Ao	6425	PvP01_10_v1_2721_-_PVP01_1031700_3	0
AMRU_Ao_TCTTTCCAGGGTGTGT	AMRU	Ao	5104	PvP01_10_v1_2721_-_PVP01_1031700_3	0.0487496
AMRU_Ao_TCTTTCCCACCCATTC	AMRU	Ao	4210	PvP01_10_v1_2721_-_PVP01_1031700_3	0
AMRU_Ao_TGAAAGACACGGTGTC	AMRU	Ao	2869	PvP01_10_v1_2721_-_PVP01_1031700_3	0
AMRU_Ao_TGAAAGACAGCCTGTG	AMRU	Ao	8308	PvP01_10_v1_2721_-_PVP01_1031700_3	0
AMRU_Ao_TGAAAGACATCCCACT	AMRU	Ao	6431	PvP01_10_v1_2721_-_PVP01_1031700_3	0
AMRU_Ao_TGAAAGATCCTCGCAT	AMRU	Ao	4164	PvP01_10_v1_2721_-_PVP01_1031700_3	0
AMRU_Ao_TGACAACAGTTCGCGC	AMRU	Ao	4950	PvP01_10_v1_2721_-_PVP01_1031700_3	0
AMRU_Ao_TGACAACTCATTCACT	AMRU	Ao	5703	PvP01_10_v1_2721_-_PVP01_1031700_3	0
AMRU_Ao_TGACAACTCCCTAACC	AMRU	Ao	8687	PvP01_10_v1_2721_-_PVP01_1031700_3	0
AMRU_Ao_TGACGGCAGACAATAC	AMRU	Ao	4545	PvP01_10_v1_2721_-_PVP01_1031700_3	0
AMRU_Ao_TGACGGCAGCTAAACA	AMRU	Ao	4620	PvP01_10_v1_2721_-_PVP01_1031700_3	0.0612708
AMRU_Ao_TGACGGCAGTCGATAA	AMRU	Ao	2811	PvP01_10_v1_2721_-_PVP01_1031700_3	0
AMRU_Ao_TGACGGCGTGGGTATG	AMRU	Ao	8080	PvP01_10_v1_2721_-_PVP01_1031700_3	0
AMRU_Ao_TGACTAGTCGCGCCAA	AMRU	Ao	2358	PvP01_10_v1_2721_-_PVP01_1031700_3	0
AMRU_Ao_TGACTTTTCGTAGGTT	AMRU	Ao	3810	PvP01_10_v1_2721_-_PVP01_1031700_3	0
AMRU_Ao_TGAGAGGCATCCCATC	AMRU	Ao	3330	PvP01_10_v1_2721_-_PVP01_1031700_3	0
AMRU_Ao_TGAGAGGGTGACAAAT	AMRU	Ao	3868	PvP01_10_v1_2721_-_PVP01_1031700_3	0
AMRU_Ao_TGAGCATAGGAGTTTA	AMRU	Ao	5321	PvP01_10_v1_2721_-_PVP01_1031700_3	0
AMRU_Ao_TGAGCATCACCCATTC	AMRU	Ao	2937	PvP01_10_v1_2721_-_PVP01_1031700_3	0
AMRU_Ao_TGAGCATCAGCGTCCA	AMRU	Ao	6197	PvP01_10_v1_2721_-_PVP01_1031700_3	0
AMRU_Ao_TGAGCATGTAGCTCCG	AMRU	Ao	9159	PvP01_10_v1_2721_-_PVP01_1031700_3	0
AMRU_Ao_TGAGCATGTTGCGTTA	AMRU	Ao	4044	PvP01_10_v1_2721_-_PVP01_1031700_3	0
AMRU_Ao_TGAGCATTCGTTGCCT	AMRU	Ao	6415	PvP01_10_v1_2721_-_PVP01_1031700_3	0.103018
AMRU_Ao_TGAGCCGCAATAGCGG	AMRU	Ao	3552	PvP01_10_v1_2721_-_PVP01_1031700_3	0
AMRU_Ao_TGAGCCGGTCGCTTTC	AMRU	Ao	300	PvP01_10_v1_2721_-_PVP01_1031700_3	0
AMRU_Ao_TGAGCCGGTGAGTATA	AMRU	Ao	8882	PvP01_10_v1_2721_-_PVP01_1031700_3	0
AMRU_Ao_TGAGGGATCACATACG	AMRU	Ao	3811	PvP01_10_v1_2721_-_PVP01_1031700_3	0
AMRU_Ao_TGAGGGATCTTGGGTA	AMRU	Ao	5166	PvP01_10_v1_2721_-_PVP01_1031700_3	0.0493852
AMRU_Ao_TGATTTCTCACAAACC	AMRU	Ao	8897	PvP01_10_v1_2721_-_PVP01_1031700_3	0
AMRU_Ao_TGATTTCTCTCCAACC	AMRU	Ao	4888	PvP01_10_v1_2721_-_PVP01_1031700_3	0.304785
AMRU_Ao_TGATTTCTCTGCAAGT	AMRU	Ao	3851	PvP01_10_v1_2721_-_PVP01_1031700_3	0
AMRU_Ao_TGCACCTAGACGACGT	AMRU	Ao	114	PvP01_10_v1_2721_-_PVP01_1031700_3	0
AMRU_Ao_TGCACCTAGCTTCGCG	AMRU	Ao	3832	PvP01_10_v1_2721_-_PVP01_1031700_3	0.0720046
AMRU_Ao_TGCACCTAGGCTCTTA	AMRU	Ao	8013	PvP01_10_v1_2721_-_PVP01_1031700_3	0
AMRU_Ao_TGCACCTGTGCAGACA	AMRU	Ao	5601	PvP01_10_v1_2721_-_PVP01_1031700_3	0.202245
AMRU_Ao_TGCACCTTCTTCTGGC	AMRU	Ao	7952	PvP01_10_v1_2721_-_PVP01_1031700_3	0
AMRU_Ao_TGCCAAAAGCGATTCT	AMRU	Ao	4115	PvP01_10_v1_2721_-_PVP01_1031700_3	0
AMRU_Ao_TGCCCATAGATCGATA	AMRU	Ao	5313	PvP01_10_v1_2721_-_PVP01_1031700_3	0
AMRU_Ao_TGCCCATAGCCGATTT	AMRU	Ao	108	PvP01_10_v1_2721_-_PVP01_1031700_3	0
AMRU_Ao_TGCCCATCAGACGCCT	AMRU	Ao	3576	PvP01_10_v1_2721_-_PVP01_1031700_3	0
AMRU_Ao_TGCCCATGTAGGAGTC	AMRU	Ao	2595	PvP01_10_v1_2721_-_PVP01_1031700_3	0.0751936
AMRU_Ao_TGCCCATGTCTAACGT	AMRU	Ao	4390	PvP01_10_v1_2721_-_PVP01_1031700_3	0
AMRU_Ao_TGCCCATGTTCGCTAA	AMRU	Ao	5539	PvP01_10_v1_2721_-_PVP01_1031700_3	0
AMRU_Ao_TGCCCTAAGGATGGAA	AMRU	Ao	340	PvP01_10_v1_2721_-_PVP01_1031700_3	0
AMRU_Ao_TGCCCTACAAGCGCTC	AMRU	Ao	8436	PvP01_10_v1_2721_-_PVP01_1031700_3	0
AMRU_Ao_TGCCCTACACTCTGTC	AMRU	Ao	8611	PvP01_10_v1_2721_-_PVP01_1031700_3	0
AMRU_Ao_TGCCCTACATGGTTGT	AMRU	Ao	8941	PvP01_10_v1_2721_-_PVP01_1031700_3	0
AMRU_Ao_TGCCCTAGTTAAGATG	AMRU	Ao	330	PvP01_10_v1_2721_-_PVP01_1031700_3	0
AMRU_Ao_TGCGCAGAGGCGACAT	AMRU	Ao	8212	PvP01_10_v1_2721_-_PVP01_1031700_3	0
AMRU_Ao_TGCGCAGCAAGTCTAC	AMRU	Ao	1561	PvP01_10_v1_2721_-_PVP01_1031700_3	0
AMRU_Ao_TGCGCAGCATGAAGTA	AMRU	Ao	2347	PvP01_10_v1_2721_-_PVP01_1031700_3	0
AMRU_Ao_TGCGCAGGTAATAGCA	AMRU	Ao	5145	PvP01_10_v1_2721_-_PVP01_1031700_3	0.0791922
AMRU_Ao_TGCGCAGTCAGGATCT	AMRU	Ao	7874	PvP01_10_v1_2721_-_PVP01_1031700_3	0
AMRU_Ao_TGCGCAGTCCAGATCA	AMRU	Ao	4787	PvP01_10_v1_2721_-_PVP01_1031700_3	0
AMRU_Ao_TGCGCAGTCGGCGCTA	AMRU	Ao	4741	PvP01_10_v1_2721_-_PVP01_1031700_3	0.0747719
AMRU_Ao_TGCGCAGTCTCGCATC	AMRU	Ao	1389	PvP01_10_v1_2721_-_PVP01_1031700_3	0
AMRU_Ao_TGCGGGTAGCGCCTCA	AMRU	Ao	5515	PvP01_10_v1_2721_-_PVP01_1031700_3	0
AMRU_Ao_TGCGTGGAGAAGGACA	AMRU	Ao	8680	PvP01_10_v1_2721_-_PVP01_1031700_3	0
AMRU_Ao_TGCGTGGAGCTAACAA	AMRU	Ao	351	PvP01_10_v1_2721_-_PVP01_1031700_3	0
AMRU_Ao_TGCGTGGAGTATTGGA	AMRU	Ao	2682	PvP01_10_v1_2721_-_PVP01_1031700_3	0
AMRU_Ao_TGCGTGGCACGTTGGC	AMRU	Ao	2769	PvP01_10_v1_2721_-_PVP01_1031700_3	0
AMRU_Ao_TGCGTGGTCATGCTCC	AMRU	Ao	5987	PvP01_10_v1_2721_-_PVP01_1031700_3	0
AMRU_Ao_TGCTACCAGTCCAGGA	AMRU	Ao	6037	PvP01_10_v1_2721_-_PVP01_1031700_3	0
AMRU_Ao_TGCTACCCAATAACGA	AMRU	Ao	8862	PvP01_10_v1_2721_-_PVP01_1031700_3	0
AMRU_Ao_TGCTACCCACTCAGGC	AMRU	Ao	8339	PvP01_10_v1_2721_-_PVP01_1031700_3	0
AMRU_Ao_TGCTACCCAGATCGGA	AMRU	Ao	9073	PvP01_10_v1_2721_-_PVP01_1031700_3	0
AMRU_Ao_TGCTACCGTTCACGGC	AMRU	Ao	4167	PvP01_10_v1_2721_-_PVP01_1031700_3	0
AMRU_Ao_TGCTACCTCACAAACC	AMRU	Ao	6310	PvP01_10_v1_2721_-_PVP01_1031700_3	0.263957
AMRU_Ao_TGCTACCTCTGGTTCC	AMRU	Ao	3471	PvP01_10_v1_2721_-_PVP01_1031700_3	0
AMRU_Ao_TGCTGCTGTCCCTACT	AMRU	Ao	1777	PvP01_10_v1_2721_-_PVP01_1031700_3	0
AMRU_Ao_TGCTGCTGTCTGCAAT	AMRU	Ao	3932	PvP01_10_v1_2721_-_PVP01_1031700_3	0
AMRU_Ao_TGCTGCTGTCTGCCAG	AMRU	Ao	5315	PvP01_10_v1_2721_-_PVP01_1031700_3	0.101379
AMRU_Ao_TGCTGCTTCCGCAAGC	AMRU	Ao	5197	PvP01_10_v1_2721_-_PVP01_1031700_3	0.0574515
AMRU_Ao_TGGACGCAGTGAAGAG	AMRU	Ao	8786	PvP01_10_v1_2721_-_PVP01_1031700_3	0
AMRU_Ao_TGGACGCTCAGTGCAT	AMRU	Ao	8625	PvP01_10_v1_2721_-_PVP01_1031700_3	0
AMRU_Ao_TGGCCAGAGAGCCCAA	AMRU	Ao	2854	PvP01_10_v1_2721_-_PVP01_1031700_3	0
AMRU_Ao_TGGCCAGAGGGCTTGA	AMRU	Ao	4784	PvP01_10_v1_2721_-_PVP01_1031700_3	0
AMRU_Ao_TGGCCAGGTGCTTCTC	AMRU	Ao	7945	PvP01_10_v1_2721_-_PVP01_1031700_3	0
AMRU_Ao_TGGCCAGGTTAAGTAG	AMRU	Ao	4084	PvP01_10_v1_2721_-_PVP01_1031700_3	0
AMRU_Ao_TGGCGCAGTTTGCATG	AMRU	Ao	5025	PvP01_10_v1_2721_-_PVP01_1031700_3	0
AMRU_Ao_TGGCGCATCTGTTGAG	AMRU	Ao	8219	PvP01_10_v1_2721_-_PVP01_1031700_3	0
AMRU_Ao_TGGCTGGAGAACTGTA	AMRU	Ao	5906	PvP01_10_v1_2721_-_PVP01_1031700_3	0.0955429
AMRU_Ao_TGGCTGGAGATAGGAG	AMRU	Ao	984	PvP01_10_v1_2721_-_PVP01_1031700_3	0
AMRU_Ao_TGGCTGGAGGATATAC	AMRU	Ao	318	PvP01_10_v1_2721_-_PVP01_1031700_3	0
AMRU_Ao_TGGCTGGGTAAACACA	AMRU	Ao	3187	PvP01_10_v1_2721_-_PVP01_1031700_3	0
AMRU_Ao_TGGCTGGTCCTATTCA	AMRU	Ao	3334	PvP01_10_v1_2721_-_PVP01_1031700_3	0
AMRU_Ao_TGGCTGGTCTACTCAT	AMRU	Ao	6631	PvP01_10_v1_2721_-_PVP01_1031700_3	0
AMRU_Ao_TGGGAAGAGGCTATCT	AMRU	Ao	4272	PvP01_10_v1_2721_-_PVP01_1031700_3	0
AMRU_Ao_TGGGAAGTCAGGTAAA	AMRU	Ao	5260	PvP01_10_v1_2721_-_PVP01_1031700_3	0
AMRU_Ao_TGGGAAGTCATAACCG	AMRU	Ao	3017	PvP01_10_v1_2721_-_PVP01_1031700_3	0
AMRU_Ao_TGGGAAGTCATTATCC	AMRU	Ao	2205	PvP01_10_v1_2721_-_PVP01_1031700_3	0
AMRU_Ao_TGGGAAGTCTGCTGCT	AMRU	Ao	8068	PvP01_10_v1_2721_-_PVP01_1031700_3	0
AMRU_Ao_TGGGCGTCAGCTGTAT	AMRU	Ao	2167	PvP01_10_v1_2721_-_PVP01_1031700_3	0
AMRU_Ao_TGGGCGTCATTCCTGC	AMRU	Ao	5238	PvP01_10_v1_2721_-_PVP01_1031700_3	1.13507
AMRU_Ao_TGGGCGTTCCGCATAA	AMRU	Ao	3961	PvP01_10_v1_2721_-_PVP01_1031700_3	0
AMRU_Ao_TGGTTAGAGGCTCTTA	AMRU	Ao	8938	PvP01_10_v1_2721_-_PVP01_1031700_3	0
AMRU_Ao_TGGTTAGAGTATCTCG	AMRU	Ao	5227	PvP01_10_v1_2721_-_PVP01_1031700_3	0
AMRU_Ao_TGGTTAGAGTCAATAG	AMRU	Ao	4140	PvP01_10_v1_2721_-_PVP01_1031700_3	0
AMRU_Ao_TGGTTAGCAAGTACCT	AMRU	Ao	6317	PvP01_10_v1_2721_-_PVP01_1031700_3	0
AMRU_Ao_TGGTTAGTCAGGTTCA	AMRU	Ao	2721	PvP01_10_v1_2721_-_PVP01_1031700_3	0
AMRU_Ao_TGGTTAGTCCGTCATC	AMRU	Ao	3068	PvP01_10_v1_2721_-_PVP01_1031700_3	0
AMRU_Ao_TGGTTAGTCGGTGTTA	AMRU	Ao	96	PvP01_10_v1_2721_-_PVP01_1031700_3	0
AMRU_Ao_TGGTTCCCACATCTTT	AMRU	Ao	4297	PvP01_10_v1_2721_-_PVP01_1031700_3	0
AMRU_Ao_TGTATTCGTCAAAGAT	AMRU	Ao	1942	PvP01_10_v1_2721_-_PVP01_1031700_3	0
AMRU_Ao_TGTATTCGTCCGTGAC	AMRU	Ao	5801	PvP01_10_v1_2721_-_PVP01_1031700_3	0
AMRU_Ao_TGTATTCGTTCAGACT	AMRU	Ao	8699	PvP01_10_v1_2721_-_PVP01_1031700_3	0
AMRU_Ao_TGTATTCTCCGTTGTC	AMRU	Ao	4086	PvP01_10_v1_2721_-_PVP01_1031700_3	0
AMRU_Ao_TGTATTCTCCTGTACC	AMRU	Ao	4526	PvP01_10_v1_2721_-_PVP01_1031700_3	0
AMRU_Ao_TGTCCCAAGACAAGCC	AMRU	Ao	3619	PvP01_10_v1_2721_-_PVP01_1031700_3	0
AMRU_Ao_TGTCCCAAGGTGATTA	AMRU	Ao	7749	PvP01_10_v1_2721_-_PVP01_1031700_3	0
AMRU_Ao_TGTCCCACAAGCCGTC	AMRU	Ao	3812	PvP01_10_v1_2721_-_PVP01_1031700_3	0
AMRU_Ao_TGTCCCATCCGTCAAA	AMRU	Ao	3931	PvP01_10_v1_2721_-_PVP01_1031700_3	0
AMRU_Ao_TGTGGTACATGCATGT	AMRU	Ao	4130	PvP01_10_v1_2721_-_PVP01_1031700_3	0
AMRU_Ao_TGTGGTAGTCTAGAGG	AMRU	Ao	4404	PvP01_10_v1_2721_-_PVP01_1031700_3	0
AMRU_Ao_TGTGTTTAGAGACTTA	AMRU	Ao	4557	PvP01_10_v1_2721_-_PVP01_1031700_3	0
AMRU_Ao_TGTGTTTCAGTCACTA	AMRU	Ao	2534	PvP01_10_v1_2721_-_PVP01_1031700_3	0
AMRU_Ao_TGTGTTTCAGTCCTTC	AMRU	Ao	2514	PvP01_10_v1_2721_-_PVP01_1031700_3	0
AMRU_Ao_TGTGTTTCAGTCGTGC	AMRU	Ao	5580	PvP01_10_v1_2721_-_PVP01_1031700_3	0.0981258
AMRU_Ao_TGTGTTTCAGTTTACG	AMRU	Ao	3724	PvP01_10_v1_2721_-_PVP01_1031700_3	0
AMRU_Ao_TGTGTTTGTGGCCCTA	AMRU	Ao	3180	PvP01_10_v1_2721_-_PVP01_1031700_3	0
AMRU_Ao_TGTGTTTGTGTTTGGT	AMRU	Ao	6177	PvP01_10_v1_2721_-_PVP01_1031700_3	0
AMRU_Ao_TGTGTTTTCACTTACT	AMRU	Ao	7873	PvP01_10_v1_2721_-_PVP01_1031700_3	0
AMRU_Ao_TGTGTTTTCAGATAAG	AMRU	Ao	7716	PvP01_10_v1_2721_-_PVP01_1031700_3	0
AMRU_Ao_TGTGTTTTCATCGATG	AMRU	Ao	8892	PvP01_10_v1_2721_-_PVP01_1031700_3	0
AMRU_Ao_TGTTCCGCAGCGATCC	AMRU	Ao	5084	PvP01_10_v1_2721_-_PVP01_1031700_3	0.0364591
AMRU_Ao_TGTTCCGTCATTATCC	AMRU	Ao	3907	PvP01_10_v1_2721_-_PVP01_1031700_3	0
AMRU_Ao_TGTTCCGTCCGGGTGT	AMRU	Ao	8587	PvP01_10_v1_2721_-_PVP01_1031700_3	0
AMRU_Ao_TGTTCCGTCTTAGCCC	AMRU	Ao	3392	PvP01_10_v1_2721_-_PVP01_1031700_3	0
AMRU_Ao_TTAACTCAGAGGGCTT	AMRU	Ao	4049	PvP01_10_v1_2721_-_PVP01_1031700_3	0.0473015
AMRU_Ao_TTAACTCAGTCCCACG	AMRU	Ao	4605	PvP01_10_v1_2721_-_PVP01_1031700_3	0
AMRU_Ao_TTAACTCCAGTGGAGT	AMRU	Ao	8780	PvP01_10_v1_2721_-_PVP01_1031700_3	0
AMRU_Ao_TTAACTCGTAGTGAAT	AMRU	Ao	4570	PvP01_10_v1_2721_-_PVP01_1031700_3	0
AMRU_Ao_TTAACTCGTCGACTGC	AMRU	Ao	5807	PvP01_10_v1_2721_-_PVP01_1031700_3	0.136268
AMRU_Ao_TTAACTCTCCAAACAC	AMRU	Ao	1225	PvP01_10_v1_2721_-_PVP01_1031700_3	0
AMRU_Ao_TTAGGACAGGTGATTA	AMRU	Ao	5303	PvP01_10_v1_2721_-_PVP01_1031700_3	0
AMRU_Ao_TTAGGACCAAACTGTC	AMRU	Ao	8917	PvP01_10_v1_2721_-_PVP01_1031700_3	0
AMRU_Ao_TTAGGACCAACACGCC	AMRU	Ao	4132	PvP01_10_v1_2721_-_PVP01_1031700_3	0
AMRU_Ao_TTAGGACTCAACGCTA	AMRU	Ao	4690	PvP01_10_v1_2721_-_PVP01_1031700_3	0
AMRU_Ao_TTAGGCAAGAAACGCC	AMRU	Ao	3976	PvP01_10_v1_2721_-_PVP01_1031700_3	0
AMRU_Ao_TTAGGCAGTCCTGCTT	AMRU	Ao	2952	PvP01_10_v1_2721_-_PVP01_1031700_3	0.0587544
AMRU_Ao_TTAGTTCAGTGTCCAT	AMRU	Ao	2193	PvP01_10_v1_2721_-_PVP01_1031700_3	0
AMRU_Ao_TTAGTTCGTGGCGAAT	AMRU	Ao	1088	PvP01_10_v1_2721_-_PVP01_1031700_3	0
AMRU_Ao_TTAGTTCTCCGAACGC	AMRU	Ao	5079	PvP01_10_v1_2721_-_PVP01_1031700_3	0
AMRU_Ao_TTATGCTAGTAGTGCG	AMRU	Ao	2176	PvP01_10_v1_2721_-_PVP01_1031700_3	0
AMRU_Ao_TTATGCTCATTCCTCG	AMRU	Ao	5240	PvP01_10_v1_2721_-_PVP01_1031700_3	0.05002
AMRU_Ao_TTCCCAGAGATGGGTC	AMRU	Ao	8734	PvP01_10_v1_2721_-_PVP01_1031700_3	0.0263103
AMRU_Ao_TTCCCAGAGCCGTCGT	AMRU	Ao	3778	PvP01_10_v1_2721_-_PVP01_1031700_3	0
AMRU_Ao_TTCCCAGAGGGATCTG	AMRU	Ao	5056	PvP01_10_v1_2721_-_PVP01_1031700_3	0.102522
AMRU_Ao_TTCCCAGGTCCGACGT	AMRU	Ao	2447	PvP01_10_v1_2721_-_PVP01_1031700_3	0
AMRU_Ao_TTCGAAGCAAATACAG	AMRU	Ao	2886	PvP01_10_v1_2721_-_PVP01_1031700_3	0
AMRU_Ao_TTCGAAGCACGGCGTT	AMRU	Ao	8563	PvP01_10_v1_2721_-_PVP01_1031700_3	0
AMRU_Ao_TTCGAAGGTGCTCTTC	AMRU	Ao	5645	PvP01_10_v1_2721_-_PVP01_1031700_3	0
AMRU_Ao_TTCGAAGGTTACTGAC	AMRU	Ao	2780	PvP01_10_v1_2721_-_PVP01_1031700_3	0
AMRU_Ao_TTCGAAGTCGGTGTCG	AMRU	Ao	433	PvP01_10_v1_2721_-_PVP01_1031700_3	0
AMRU_Ao_TTCGGTCCACACATGT	AMRU	Ao	5251	PvP01_10_v1_2721_-_PVP01_1031700_3	0
AMRU_Ao_TTCGGTCCACTGAAGG	AMRU	Ao	4859	PvP01_10_v1_2721_-_PVP01_1031700_3	0
AMRU_Ao_TTCGGTCCATGACATC	AMRU	Ao	4508	PvP01_10_v1_2721_-_PVP01_1031700_3	0
AMRU_Ao_TTCGGTCTCGTCTGAA	AMRU	Ao	4912	PvP01_10_v1_2721_-_PVP01_1031700_3	0.0913409
AMRU_Ao_TTCGGTCTCTGTGCAA	AMRU	Ao	9072	PvP01_10_v1_2721_-_PVP01_1031700_3	0
AMRU_Ao_TTCTACAGTTCCCGAG	AMRU	Ao	2906	PvP01_10_v1_2721_-_PVP01_1031700_3	0
AMRU_Ao_TTCTACATCACGATGT	AMRU	Ao	3114	PvP01_10_v1_2721_-_PVP01_1031700_3	0
AMRU_Ao_TTCTACATCGTTGACA	AMRU	Ao	6852	PvP01_10_v1_2721_-_PVP01_1031700_3	0
AMRU_Ao_TTCTACATCTCAAGTG	AMRU	Ao	7769	PvP01_10_v1_2721_-_PVP01_1031700_3	0
AMRU_Ao_TTCTACATCTCGAGTA	AMRU	Ao	6123	PvP01_10_v1_2721_-_PVP01_1031700_3	0.0425044
AMRU_Ao_TTCTCAACAAGAGGCT	AMRU	Ao	3843	PvP01_10_v1_2721_-_PVP01_1031700_3	0.0395961
AMRU_Ao_TTCTCAAGTGTGAATA	AMRU	Ao	6424	PvP01_10_v1_2721_-_PVP01_1031700_3	0.0592417
AMRU_Ao_TTCTCAAGTTGCGCAC	AMRU	Ao	1740	PvP01_10_v1_2721_-_PVP01_1031700_3	0
AMRU_Ao_TTCTCAATCCGTTGTC	AMRU	Ao	4790	PvP01_10_v1_2721_-_PVP01_1031700_3	0
AMRU_Ao_TTCTCCTTCGATAGAA	AMRU	Ao	4046	PvP01_10_v1_2721_-_PVP01_1031700_3	0.0549119
AMRU_Ao_TTCTCCTTCTCATTCA	AMRU	Ao	1828	PvP01_10_v1_2721_-_PVP01_1031700_3	0
AMRU_Ao_TTCTCCTTCTTCAACT	AMRU	Ao	2967	PvP01_10_v1_2721_-_PVP01_1031700_3	0
AMRU_Ao_TTCTTAGAGACAAAGG	AMRU	Ao	3650	PvP01_10_v1_2721_-_PVP01_1031700_3	0
AMRU_Ao_TTCTTAGAGCACCGCT	AMRU	Ao	4470	PvP01_10_v1_2721_-_PVP01_1031700_3	0
AMRU_Ao_TTCTTAGAGGTGATAT	AMRU	Ao	5194	PvP01_10_v1_2721_-_PVP01_1031700_3	0
AMRU_Ao_TTCTTAGCAGTCAGCC	AMRU	Ao	3919	PvP01_10_v1_2721_-_PVP01_1031700_3	0
AMRU_Ao_TTCTTAGCATCCGTGG	AMRU	Ao	8863	PvP01_10_v1_2721_-_PVP01_1031700_3	0
AMRU_Ao_TTCTTAGGTACGCACC	AMRU	Ao	4387	PvP01_10_v1_2721_-_PVP01_1031700_3	0
AMRU_Ao_TTCTTAGTCAACACCA	AMRU	Ao	1432	PvP01_10_v1_2721_-_PVP01_1031700_3	0
AMRU_Ao_TTGAACGAGGATGCGT	AMRU	Ao	3282	PvP01_10_v1_2721_-_PVP01_1031700_3	0
AMRU_Ao_TTGAACGGTGAGCGAT	AMRU	Ao	5434	PvP01_10_v1_2721_-_PVP01_1031700_3	0
AMRU_Ao_TTGAACGGTTTCCACC	AMRU	Ao	2004	PvP01_10_v1_2721_-_PVP01_1031700_3	0
AMRU_Ao_TTGAACGTCACGACTA	AMRU	Ao	5284	PvP01_10_v1_2721_-_PVP01_1031700_3	0.557414
AMRU_Ao_TTGACTTCAAGCCATT	AMRU	Ao	3323	PvP01_10_v1_2721_-_PVP01_1031700_3	0
AMRU_Ao_TTGACTTCATGAACCT	AMRU	Ao	7702	PvP01_10_v1_2721_-_PVP01_1031700_3	0
AMRU_Ao_TTGACTTGTCAGTGGA	AMRU	Ao	3509	PvP01_10_v1_2721_-_PVP01_1031700_3	0
AMRU_Ao_TTGCCGTAGTATCGAA	AMRU	Ao	4488	PvP01_10_v1_2721_-_PVP01_1031700_3	0
AMRU_Ao_TTGCCGTGTCAACATC	AMRU	Ao	1469	PvP01_10_v1_2721_-_PVP01_1031700_3	0
AMRU_Ao_TTGCCGTGTGAAAGAG	AMRU	Ao	88	PvP01_10_v1_2721_-_PVP01_1031700_3	0
AMRU_Ao_TTGCCGTTCTTATCTG	AMRU	Ao	5091	PvP01_10_v1_2721_-_PVP01_1031700_3	0
AMRU_Ao_TTGCGTCTCCATGCTC	AMRU	Ao	5309	PvP01_10_v1_2721_-_PVP01_1031700_3	0.0604011
AMRU_Ao_TTGGAACCACGTCAGC	AMRU	Ao	5360	PvP01_10_v1_2721_-_PVP01_1031700_3	0.128477
AMRU_Ao_TTGGCAAAGCCTTGAT	AMRU	Ao	3238	PvP01_10_v1_2721_-_PVP01_1031700_3	0
AMRU_Ao_TTGGCAACAACACCTA	AMRU	Ao	1988	PvP01_10_v1_2721_-_PVP01_1031700_3	0
AMRU_Ao_TTGGCAAGTCTTGTCC	AMRU	Ao	1423	PvP01_10_v1_2721_-_PVP01_1031700_3	0
AMRU_Ao_TTGGCAATCAACACCA	AMRU	Ao	2289	PvP01_10_v1_2721_-_PVP01_1031700_3	0
AMRU_Ao_TTGTAGGAGGGCTTCC	AMRU	Ao	4205	PvP01_10_v1_2721_-_PVP01_1031700_3	0
AMRU_Ao_TTTACTGAGTCGAGTG	AMRU	Ao	3765	PvP01_10_v1_2721_-_PVP01_1031700_3	0
AMRU_Ao_TTTACTGCACAAGACG	AMRU	Ao	4989	PvP01_10_v1_2721_-_PVP01_1031700_3	0
AMRU_Ao_TTTACTGCACAAGCCC	AMRU	Ao	5160	PvP01_10_v1_2721_-_PVP01_1031700_3	0
AMRU_Ao_TTTACTGTCATGCTCC	AMRU	Ao	2934	PvP01_10_v1_2721_-_PVP01_1031700_3	0
AMRU_Ao_TTTATGCAGCAATCTC	AMRU	Ao	8704	PvP01_10_v1_2721_-_PVP01_1031700_3	0
AMRU_Ao_TTTCCTCGTCTGCCAG	AMRU	Ao	2547	PvP01_10_v1_2721_-_PVP01_1031700_3	0
AMRU_Ao_TTTGCGCAGGAGCGAG	AMRU	Ao	4522	PvP01_10_v1_2721_-_PVP01_1031700_3	0
AMRU_Ao_TTTGCGCAGGCGACAT	AMRU	Ao	3702	PvP01_10_v1_2721_-_PVP01_1031700_3	0
AMRU_Ao_TTTGCGCCACAACTGT	AMRU	Ao	3135	PvP01_10_v1_2721_-_PVP01_1031700_3	0
AMRU_Ao_TTTGCGCGTAACGCGA	AMRU	Ao	1819	PvP01_10_v1_2721_-_PVP01_1031700_3	0
AMRU_Ao_TTTGCGCGTATCACCA	AMRU	Ao	6712	PvP01_10_v1_2721_-_PVP01_1031700_3	0
AMRU_Ao_TTTGCGCGTTCTGGTA	AMRU	Ao	5608	PvP01_10_v1_2721_-_PVP01_1031700_3	0
AMRU_Ao_TTTGGTTAGTGGGCTA	AMRU	Ao	4979	PvP01_10_v1_2721_-_PVP01_1031700_3	0.0478835
AMRU_Ao_TTTGTCAAGATGCCAG	AMRU	Ao	6851	PvP01_10_v1_2721_-_PVP01_1031700_3	0
AMRU_Ao_TTTGTCACAGTATAAG	AMRU	Ao	4486	PvP01_10_v1_2721_-_PVP01_1031700_3	0.0571167
AMRU_Ao_TTTGTCAGTCCCGACA	AMRU	Ao	3505	PvP01_10_v1_2721_-_PVP01_1031700_3	0.0537057
AMRU_CQ_AAACCTGAGGGAACGG	AMRU	CQ	2594	PvP01_10_v1_2721_-_PVP01_1031700_3	0
AMRU_CQ_AAACCTGCATCGGGTC	AMRU	CQ	1653	PvP01_10_v1_2721_-_PVP01_1031700_3	0
AMRU_CQ_AAACCTGTCGTCCAGG	AMRU	CQ	3140	PvP01_10_v1_2721_-_PVP01_1031700_3	0.0749288
AMRU_CQ_AAACGGGAGTGCAAGC	AMRU	CQ	2429	PvP01_10_v1_2721_-_PVP01_1031700_3	0
AMRU_CQ_AAACGGGCATGGGACA	AMRU	CQ	1212	PvP01_10_v1_2721_-_PVP01_1031700_3	0
AMRU_CQ_AAACGGGGTGAAGGCT	AMRU	CQ	3736	PvP01_10_v1_2721_-_PVP01_1031700_3	0.0477418
AMRU_CQ_AAACGGGTCGCATGGC	AMRU	CQ	2374	PvP01_10_v1_2721_-_PVP01_1031700_3	0
AMRU_CQ_AAACGGGTCGCCTGTT	AMRU	CQ	3473	PvP01_10_v1_2721_-_PVP01_1031700_3	0.851064
AMRU_CQ_AAAGATGAGAAGATTC	AMRU	CQ	2798	PvP01_10_v1_2721_-_PVP01_1031700_3	0
AMRU_CQ_AAAGATGCACTGTTAG	AMRU	CQ	7810	PvP01_10_v1_2721_-_PVP01_1031700_3	0
AMRU_CQ_AAAGATGCAGACGCTC	AMRU	CQ	7310	PvP01_10_v1_2721_-_PVP01_1031700_3	0
AMRU_CQ_AAAGATGGTCCATCCT	AMRU	CQ	2428	PvP01_10_v1_2721_-_PVP01_1031700_3	0.0557041
AMRU_CQ_AAAGATGGTGTATGGG	AMRU	CQ	2274	PvP01_10_v1_2721_-_PVP01_1031700_3	0
AMRU_CQ_AAAGATGTCTGTTGAG	AMRU	CQ	1484	PvP01_10_v1_2721_-_PVP01_1031700_3	0
AMRU_CQ_AAAGCAAAGATCGGGT	AMRU	CQ	2135	PvP01_10_v1_2721_-_PVP01_1031700_3	0
AMRU_CQ_AAAGCAAAGGCTAGCA	AMRU	CQ	2699	PvP01_10_v1_2721_-_PVP01_1031700_3	0
AMRU_CQ_AAAGCAAAGTACACCT	AMRU	CQ	2957	PvP01_10_v1_2721_-_PVP01_1031700_3	0
AMRU_CQ_AAAGCAAGTTGACGTT	AMRU	CQ	3635	PvP01_10_v1_2721_-_PVP01_1031700_3	0
AMRU_CQ_AAAGTAGGTCTGCGGT	AMRU	CQ	2369	PvP01_10_v1_2721_-_PVP01_1031700_3	0
AMRU_CQ_AAAGTAGTCGCGTAGC	AMRU	CQ	1685	PvP01_10_v1_2721_-_PVP01_1031700_3	0
AMRU_CQ_AAAGTAGTCTCTGCTG	AMRU	CQ	2704	PvP01_10_v1_2721_-_PVP01_1031700_3	0
AMRU_CQ_AAATGCCAGACTAAGT	AMRU	CQ	1913	PvP01_10_v1_2721_-_PVP01_1031700_3	0
AMRU_CQ_AACACGTAGAACTGTA	AMRU	CQ	2525	PvP01_10_v1_2721_-_PVP01_1031700_3	0
AMRU_CQ_AACACGTAGTGCAAGC	AMRU	CQ	3604	PvP01_10_v1_2721_-_PVP01_1031700_3	0.0393174
AMRU_CQ_AACACGTCAAGCTGTT	AMRU	CQ	2115	PvP01_10_v1_2721_-_PVP01_1031700_3	0
AMRU_CQ_AACACGTCATGGTTGT	AMRU	CQ	3189	PvP01_10_v1_2721_-_PVP01_1031700_3	0.103875
AMRU_CQ_AACACGTGTCTCAACA	AMRU	CQ	1703	PvP01_10_v1_2721_-_PVP01_1031700_3	0
AMRU_CQ_AACCATGAGTTGCAGG	AMRU	CQ	2217	PvP01_10_v1_2721_-_PVP01_1031700_3	0
AMRU_CQ_AACCATGCAATCAGAA	AMRU	CQ	8231	PvP01_10_v1_2721_-_PVP01_1031700_3	0
AMRU_CQ_AACCATGCACCTATCC	AMRU	CQ	3000	PvP01_10_v1_2721_-_PVP01_1031700_3	0
AMRU_CQ_AACCATGCAGGCTGAA	AMRU	CQ	2776	PvP01_10_v1_2721_-_PVP01_1031700_3	0
AMRU_CQ_AACCATGGTAGAGGAA	AMRU	CQ	1055	PvP01_10_v1_2721_-_PVP01_1031700_3	0
AMRU_CQ_AACCATGGTCGAATCT	AMRU	CQ	1783	PvP01_10_v1_2721_-_PVP01_1031700_3	0
AMRU_CQ_AACCGCGTCAACCATG	AMRU	CQ	1782	PvP01_10_v1_2721_-_PVP01_1031700_3	0
AMRU_CQ_AACGTTGAGACCTTTG	AMRU	CQ	872	PvP01_10_v1_2721_-_PVP01_1031700_3	0
AMRU_CQ_AACGTTGAGTGTCTCA	AMRU	CQ	7384	PvP01_10_v1_2721_-_PVP01_1031700_3	0
AMRU_CQ_AACGTTGGTTCCATGA	AMRU	CQ	3348	PvP01_10_v1_2721_-_PVP01_1031700_3	0
AMRU_CQ_AACTCAGAGGTTCCTA	AMRU	CQ	3938	PvP01_10_v1_2721_-_PVP01_1031700_3	0
AMRU_CQ_AACTCAGAGTGTCCCG	AMRU	CQ	9079	PvP01_10_v1_2721_-_PVP01_1031700_3	0
AMRU_CQ_AACTCAGCATGCAATC	AMRU	CQ	4342	PvP01_10_v1_2721_-_PVP01_1031700_3	0.0813206
AMRU_CQ_AACTCAGGTCGGCTCA	AMRU	CQ	3897	PvP01_10_v1_2721_-_PVP01_1031700_3	0
AMRU_CQ_AACTCAGTCACCGGGT	AMRU	CQ	6934	PvP01_10_v1_2721_-_PVP01_1031700_3	0.18534
AMRU_CQ_AACTCAGTCCTACAGA	AMRU	CQ	3224	PvP01_10_v1_2721_-_PVP01_1031700_3	0
AMRU_CQ_AACTCCCAGATGTCGG	AMRU	CQ	1902	PvP01_10_v1_2721_-_PVP01_1031700_3	0
AMRU_CQ_AACTCCCAGGGCTTCC	AMRU	CQ	2955	PvP01_10_v1_2721_-_PVP01_1031700_3	0
AMRU_CQ_AACTCCCCATACCATG	AMRU	CQ	2468	PvP01_10_v1_2721_-_PVP01_1031700_3	0.0479823
AMRU_CQ_AACTCCCGTAAGTTCC	AMRU	CQ	1927	PvP01_10_v1_2721_-_PVP01_1031700_3	0
AMRU_CQ_AACTCCCGTGTCAATC	AMRU	CQ	2873	PvP01_10_v1_2721_-_PVP01_1031700_3	0
AMRU_CQ_AACTCTTAGCAGACTG	AMRU	CQ	3874	PvP01_10_v1_2721_-_PVP01_1031700_3	0
AMRU_CQ_AACTCTTAGCTTCGCG	AMRU	CQ	3081	PvP01_10_v1_2721_-_PVP01_1031700_3	0
AMRU_CQ_AACTCTTCACCGTTGG	AMRU	CQ	2334	PvP01_10_v1_2721_-_PVP01_1031700_3	0
AMRU_CQ_AACTCTTCATCGGAAG	AMRU	CQ	2774	PvP01_10_v1_2721_-_PVP01_1031700_3	0
AMRU_CQ_AACTCTTTCAGCTGGC	AMRU	CQ	2344	PvP01_10_v1_2721_-_PVP01_1031700_3	0
AMRU_CQ_AACTCTTTCCAGAAGG	AMRU	CQ	4052	PvP01_10_v1_2721_-_PVP01_1031700_3	0.250156
AMRU_CQ_AACTCTTTCCGAGCCA	AMRU	CQ	1738	PvP01_10_v1_2721_-_PVP01_1031700_3	0
AMRU_CQ_AACTGGTAGCCTTGAT	AMRU	CQ	2331	PvP01_10_v1_2721_-_PVP01_1031700_3	0
AMRU_CQ_AACTGGTAGCGTAATA	AMRU	CQ	4285	PvP01_10_v1_2721_-_PVP01_1031700_3	0.0913159
AMRU_CQ_AACTGGTAGGAGCGAG	AMRU	CQ	3229	PvP01_10_v1_2721_-_PVP01_1031700_3	0
AMRU_CQ_AACTGGTCACCTGGTG	AMRU	CQ	7662	PvP01_10_v1_2721_-_PVP01_1031700_3	0.184775
AMRU_CQ_AACTGGTCATCTCCCA	AMRU	CQ	1990	PvP01_10_v1_2721_-_PVP01_1031700_3	0
AMRU_CQ_AACTGGTGTAAACACA	AMRU	CQ	2591	PvP01_10_v1_2721_-_PVP01_1031700_3	0
AMRU_CQ_AACTTTCAGACCTTTG	AMRU	CQ	3514	PvP01_10_v1_2721_-_PVP01_1031700_3	0
AMRU_CQ_AACTTTCCATCGACGC	AMRU	CQ	1627	PvP01_10_v1_2721_-_PVP01_1031700_3	0
AMRU_CQ_AACTTTCGTTCAGACT	AMRU	CQ	1973	PvP01_10_v1_2721_-_PVP01_1031700_3	0
AMRU_CQ_AACTTTCTCTAACCGA	AMRU	CQ	2655	PvP01_10_v1_2721_-_PVP01_1031700_3	0
AMRU_CQ_AAGACCTAGAGCCTAG	AMRU	CQ	1612	PvP01_10_v1_2721_-_PVP01_1031700_3	0
AMRU_CQ_AAGACCTCAACTGGCC	AMRU	CQ	4111	PvP01_10_v1_2721_-_PVP01_1031700_3	0.0699888
AMRU_CQ_AAGACCTGTCTAGGTT	AMRU	CQ	3716	PvP01_10_v1_2721_-_PVP01_1031700_3	0
AMRU_CQ_AAGCCGCAGACCACGA	AMRU	CQ	237	PvP01_10_v1_2721_-_PVP01_1031700_3	0
AMRU_CQ_AAGCCGCAGAGTACAT	AMRU	CQ	2218	PvP01_10_v1_2721_-_PVP01_1031700_3	0
AMRU_CQ_AAGCCGCAGCTCCTTC	AMRU	CQ	2684	PvP01_10_v1_2721_-_PVP01_1031700_3	0
AMRU_CQ_AAGCCGCGTAGCTGCC	AMRU	CQ	1962	PvP01_10_v1_2721_-_PVP01_1031700_3	0
AMRU_CQ_AAGCCGCTCCCTGACT	AMRU	CQ	1466	PvP01_10_v1_2721_-_PVP01_1031700_3	0
AMRU_CQ_AAGGAGCAGCGGATCA	AMRU	CQ	3678	PvP01_10_v1_2721_-_PVP01_1031700_3	0.202747
AMRU_CQ_AAGGAGCAGTGGGTTG	AMRU	CQ	4563	PvP01_10_v1_2721_-_PVP01_1031700_3	0.13177
AMRU_CQ_AAGGAGCCAGACAAGC	AMRU	CQ	2805	PvP01_10_v1_2721_-_PVP01_1031700_3	0
AMRU_CQ_AAGGAGCCATACGCCG	AMRU	CQ	1412	PvP01_10_v1_2721_-_PVP01_1031700_3	0
AMRU_CQ_AAGGAGCTCAGGCGAA	AMRU	CQ	1090	PvP01_10_v1_2721_-_PVP01_1031700_3	0
AMRU_CQ_AAGGCAGAGGAATTAC	AMRU	CQ	3076	PvP01_10_v1_2721_-_PVP01_1031700_3	0
AMRU_CQ_AAGGCAGCAGTCGTGC	AMRU	CQ	2502	PvP01_10_v1_2721_-_PVP01_1031700_3	0.0691922
AMRU_CQ_AAGGCAGGTACAGCAG	AMRU	CQ	3696	PvP01_10_v1_2721_-_PVP01_1031700_3	0
AMRU_CQ_AAGGCAGTCAAGGCTT	AMRU	CQ	8304	PvP01_10_v1_2721_-_PVP01_1031700_3	0
AMRU_CQ_AAGGTTCCACGGATAG	AMRU	CQ	1074	PvP01_10_v1_2721_-_PVP01_1031700_3	0
AMRU_CQ_AAGGTTCTCAGCTCGG	AMRU	CQ	3997	PvP01_10_v1_2721_-_PVP01_1031700_3	0.0932314
AMRU_CQ_AAGGTTCTCAGGCCCA	AMRU	CQ	2667	PvP01_10_v1_2721_-_PVP01_1031700_3	0.0546807
AMRU_CQ_AAGTCTGAGTACACCT	AMRU	CQ	8350	PvP01_10_v1_2721_-_PVP01_1031700_3	0
AMRU_CQ_AAGTCTGGTTCTGGTA	AMRU	CQ	4726	PvP01_10_v1_2721_-_PVP01_1031700_3	0.142349
AMRU_CQ_AATCCAGCACACATGT	AMRU	CQ	4101	PvP01_10_v1_2721_-_PVP01_1031700_3	0.210084
AMRU_CQ_AATCCAGCACGACTCG	AMRU	CQ	3727	PvP01_10_v1_2721_-_PVP01_1031700_3	0.0983768
AMRU_CQ_AATCCAGGTAAGTGGC	AMRU	CQ	2678	PvP01_10_v1_2721_-_PVP01_1031700_3	0
AMRU_CQ_AATCCAGGTATCGCAT	AMRU	CQ	2711	PvP01_10_v1_2721_-_PVP01_1031700_3	0
AMRU_CQ_AATCCAGTCGCTAGCG	AMRU	CQ	1760	PvP01_10_v1_2721_-_PVP01_1031700_3	0
AMRU_CQ_AATCGGTAGCTAAACA	AMRU	CQ	3429	PvP01_10_v1_2721_-_PVP01_1031700_3	0
AMRU_CQ_AATCGGTCATATACCG	AMRU	CQ	1837	PvP01_10_v1_2721_-_PVP01_1031700_3	0
AMRU_CQ_AATCGGTGTTCCGTCT	AMRU	CQ	3161	PvP01_10_v1_2721_-_PVP01_1031700_3	0
AMRU_CQ_ACACCAAAGCTCTCGG	AMRU	CQ	3020	PvP01_10_v1_2721_-_PVP01_1031700_3	0
AMRU_CQ_ACACCAATCTCAACTT	AMRU	CQ	1859	PvP01_10_v1_2721_-_PVP01_1031700_3	0
AMRU_CQ_ACACCCTAGGAGCGAG	AMRU	CQ	1950	PvP01_10_v1_2721_-_PVP01_1031700_3	0.0619924
AMRU_CQ_ACACCCTAGTTACCCA	AMRU	CQ	2518	PvP01_10_v1_2721_-_PVP01_1031700_3	0
AMRU_CQ_ACACCCTCAGCTGTAT	AMRU	CQ	4608	PvP01_10_v1_2721_-_PVP01_1031700_3	0.332834
AMRU_CQ_ACACCCTTCATGTCTT	AMRU	CQ	6044	PvP01_10_v1_2721_-_PVP01_1031700_3	0.233754
AMRU_CQ_ACACCGGCATGGTCAT	AMRU	CQ	3658	PvP01_10_v1_2721_-_PVP01_1031700_3	0.0567215
AMRU_CQ_ACACCGGGTATAATGG	AMRU	CQ	2676	PvP01_10_v1_2721_-_PVP01_1031700_3	0
AMRU_CQ_ACACCGGGTCTAGTCA	AMRU	CQ	2669	PvP01_10_v1_2721_-_PVP01_1031700_3	0
AMRU_CQ_ACACCGGGTCTAGTGT	AMRU	CQ	2349	PvP01_10_v1_2721_-_PVP01_1031700_3	0
AMRU_CQ_ACACCGGGTGGTACAG	AMRU	CQ	2409	PvP01_10_v1_2721_-_PVP01_1031700_3	0
AMRU_CQ_ACACCGGGTTATTCTC	AMRU	CQ	1914	PvP01_10_v1_2721_-_PVP01_1031700_3	0
AMRU_CQ_ACACCGGTCTGCGTAA	AMRU	CQ	2299	PvP01_10_v1_2721_-_PVP01_1031700_3	0.073779
AMRU_CQ_ACACTGAGTAGCGCAA	AMRU	CQ	4349	PvP01_10_v1_2721_-_PVP01_1031700_3	0.0984058
AMRU_CQ_ACAGCCGCAAGACACG	AMRU	CQ	1771	PvP01_10_v1_2721_-_PVP01_1031700_3	0
AMRU_CQ_ACAGCCGCAGTAAGAT	AMRU	CQ	4038	PvP01_10_v1_2721_-_PVP01_1031700_3	0
AMRU_CQ_ACAGCCGCATATGAGA	AMRU	CQ	2474	PvP01_10_v1_2721_-_PVP01_1031700_3	0
AMRU_CQ_ACAGCCGGTCTAACGT	AMRU	CQ	8071	PvP01_10_v1_2721_-_PVP01_1031700_3	0
AMRU_CQ_ACAGCCGTCTGTTTGT	AMRU	CQ	4190	PvP01_10_v1_2721_-_PVP01_1031700_3	0.046977
AMRU_CQ_ACAGCTAAGACTAGGC	AMRU	CQ	1886	PvP01_10_v1_2721_-_PVP01_1031700_3	0
AMRU_CQ_ACAGCTACAAAGGCGT	AMRU	CQ	2114	PvP01_10_v1_2721_-_PVP01_1031700_3	0
AMRU_CQ_ACATACGAGCCGATTT	AMRU	CQ	1894	PvP01_10_v1_2721_-_PVP01_1031700_3	0
AMRU_CQ_ACATACGAGCGTAATA	AMRU	CQ	2159	PvP01_10_v1_2721_-_PVP01_1031700_3	0
AMRU_CQ_ACATACGCATCTATGG	AMRU	CQ	3457	PvP01_10_v1_2721_-_PVP01_1031700_3	0.044238
AMRU_CQ_ACATACGGTCACAAGG	AMRU	CQ	1137	PvP01_10_v1_2721_-_PVP01_1031700_3	0
AMRU_CQ_ACATACGGTTTGCATG	AMRU	CQ	2145	PvP01_10_v1_2721_-_PVP01_1031700_3	0
AMRU_CQ_ACATCAGAGATCGATA	AMRU	CQ	3779	PvP01_10_v1_2721_-_PVP01_1031700_3	0
AMRU_CQ_ACATCAGGTTAAGTAG	AMRU	CQ	2315	PvP01_10_v1_2721_-_PVP01_1031700_3	0.16176
AMRU_CQ_ACATGGTAGAACTGTA	AMRU	CQ	1481	PvP01_10_v1_2721_-_PVP01_1031700_3	0
AMRU_CQ_ACATGGTAGACTGGGT	AMRU	CQ	3246	PvP01_10_v1_2721_-_PVP01_1031700_3	0
AMRU_CQ_ACATGGTAGATAGCAT	AMRU	CQ	924	PvP01_10_v1_2721_-_PVP01_1031700_3	0
AMRU_CQ_ACATGGTAGTCAATAG	AMRU	CQ	1597	PvP01_10_v1_2721_-_PVP01_1031700_3	0
AMRU_CQ_ACATGGTCAAGCCCAC	AMRU	CQ	2686	PvP01_10_v1_2721_-_PVP01_1031700_3	0
AMRU_CQ_ACATGGTCACCAGGTC	AMRU	CQ	2261	PvP01_10_v1_2721_-_PVP01_1031700_3	0
AMRU_CQ_ACATGGTGTCTTCAAG	AMRU	CQ	2181	PvP01_10_v1_2721_-_PVP01_1031700_3	0
AMRU_CQ_ACATGGTGTGCAGACA	AMRU	CQ	256	PvP01_10_v1_2721_-_PVP01_1031700_3	0
AMRU_CQ_ACCAGTAAGATCGATA	AMRU	CQ	4018	PvP01_10_v1_2721_-_PVP01_1031700_3	0.044342
AMRU_CQ_ACCAGTAAGCCTCGTG	AMRU	CQ	1408	PvP01_10_v1_2721_-_PVP01_1031700_3	0
AMRU_CQ_ACCAGTAGTAGCGTAG	AMRU	CQ	2971	PvP01_10_v1_2721_-_PVP01_1031700_3	0
AMRU_CQ_ACCAGTATCCTTTACA	AMRU	CQ	1736	PvP01_10_v1_2721_-_PVP01_1031700_3	0
AMRU_CQ_ACCAGTATCTCGCTTG	AMRU	CQ	2462	PvP01_10_v1_2721_-_PVP01_1031700_3	0.188182
AMRU_CQ_ACCCACTAGACTAGGC	AMRU	CQ	1707	PvP01_10_v1_2721_-_PVP01_1031700_3	0
AMRU_CQ_ACCCACTGTACCATCA	AMRU	CQ	1163	PvP01_10_v1_2721_-_PVP01_1031700_3	0
AMRU_CQ_ACCGTAATCCGAACGC	AMRU	CQ	1908	PvP01_10_v1_2721_-_PVP01_1031700_3	0
AMRU_CQ_ACCTTTACAGGTGGAT	AMRU	CQ	3010	PvP01_10_v1_2721_-_PVP01_1031700_3	0.0554693
AMRU_CQ_ACCTTTAGTCAGAATA	AMRU	CQ	2137	PvP01_10_v1_2721_-_PVP01_1031700_3	0
AMRU_CQ_ACCTTTAGTGTTTGTG	AMRU	CQ	4431	PvP01_10_v1_2721_-_PVP01_1031700_3	0.716589
AMRU_CQ_ACGAGCCAGGTGATAT	AMRU	CQ	1733	PvP01_10_v1_2721_-_PVP01_1031700_3	0
AMRU_CQ_ACGAGCCCACTTCTGC	AMRU	CQ	3625	PvP01_10_v1_2721_-_PVP01_1031700_3	0.129349
AMRU_CQ_ACGAGCCGTTTGTGTG	AMRU	CQ	1279	PvP01_10_v1_2721_-_PVP01_1031700_3	0
AMRU_CQ_ACGAGGACATGTCGAT	AMRU	CQ	2604	PvP01_10_v1_2721_-_PVP01_1031700_3	0
AMRU_CQ_ACGAGGAGTCAGAAGC	AMRU	CQ	1829	PvP01_10_v1_2721_-_PVP01_1031700_3	0
AMRU_CQ_ACGAGGATCACCCGAG	AMRU	CQ	2372	PvP01_10_v1_2721_-_PVP01_1031700_3	0
AMRU_CQ_ACGAGGATCAGTGCAT	AMRU	CQ	1961	PvP01_10_v1_2721_-_PVP01_1031700_3	0
AMRU_CQ_ACGATACTCTCTAGGA	AMRU	CQ	1673	PvP01_10_v1_2721_-_PVP01_1031700_3	0
AMRU_CQ_ACGATGTCATCACCCT	AMRU	CQ	4361	PvP01_10_v1_2721_-_PVP01_1031700_3	0.0490629
AMRU_CQ_ACGATGTTCAACTCTT	AMRU	CQ	1663	PvP01_10_v1_2721_-_PVP01_1031700_3	0
AMRU_CQ_ACGATGTTCAGTGTTG	AMRU	CQ	2189	PvP01_10_v1_2721_-_PVP01_1031700_3	0
AMRU_CQ_ACGCAGCCAAGAGTCG	AMRU	CQ	1549	PvP01_10_v1_2721_-_PVP01_1031700_3	0
AMRU_CQ_ACGCAGCCATTACGAC	AMRU	CQ	3730	PvP01_10_v1_2721_-_PVP01_1031700_3	0
AMRU_CQ_ACGCAGCGTTCCTCCA	AMRU	CQ	3079	PvP01_10_v1_2721_-_PVP01_1031700_3	0
AMRU_CQ_ACGCCAGCACTGCCAG	AMRU	CQ	2368	PvP01_10_v1_2721_-_PVP01_1031700_3	0
AMRU_CQ_ACGCCAGGTAACGCGA	AMRU	CQ	6286	PvP01_10_v1_2721_-_PVP01_1031700_3	0.17343
AMRU_CQ_ACGCCGACAAGACACG	AMRU	CQ	1278	PvP01_10_v1_2721_-_PVP01_1031700_3	0
AMRU_CQ_ACGCCGACAATAGAGT	AMRU	CQ	1763	PvP01_10_v1_2721_-_PVP01_1031700_3	0
AMRU_CQ_ACGCCGACACCAGGCT	AMRU	CQ	1602	PvP01_10_v1_2721_-_PVP01_1031700_3	0
AMRU_CQ_ACGCCGATCTGAGTGT	AMRU	CQ	8029	PvP01_10_v1_2721_-_PVP01_1031700_3	0
AMRU_CQ_ACGGAGAGTCAATACC	AMRU	CQ	2874	PvP01_10_v1_2721_-_PVP01_1031700_3	0
AMRU_CQ_ACGGAGAGTCGAACAG	AMRU	CQ	1923	PvP01_10_v1_2721_-_PVP01_1031700_3	0
AMRU_CQ_ACGGAGATCGTGGACC	AMRU	CQ	1227	PvP01_10_v1_2721_-_PVP01_1031700_3	0
AMRU_CQ_ACGGCCAAGCTATGCT	AMRU	CQ	3169	PvP01_10_v1_2721_-_PVP01_1031700_3	0
AMRU_CQ_ACGGGCTGTCCGTCAG	AMRU	CQ	2848	PvP01_10_v1_2721_-_PVP01_1031700_3	0
AMRU_CQ_ACGGGCTGTCGAACAG	AMRU	CQ	3144	PvP01_10_v1_2721_-_PVP01_1031700_3	0.0993739
AMRU_CQ_ACGGGTCAGGCTCTTA	AMRU	CQ	2926	PvP01_10_v1_2721_-_PVP01_1031700_3	0
AMRU_CQ_ACGGGTCAGGGCACTA	AMRU	CQ	1422	PvP01_10_v1_2721_-_PVP01_1031700_3	0
AMRU_CQ_ACGGGTCCAGTTTACG	AMRU	CQ	3624	PvP01_10_v1_2721_-_PVP01_1031700_3	0.0591296
AMRU_CQ_ACGGGTCTCAAAGACA	AMRU	CQ	5001	PvP01_10_v1_2721_-_PVP01_1031700_3	0
AMRU_CQ_ACGTCAAAGAGAACAG	AMRU	CQ	3375	PvP01_10_v1_2721_-_PVP01_1031700_3	0
AMRU_CQ_ACGTCAATCATGTGGT	AMRU	CQ	4200	PvP01_10_v1_2721_-_PVP01_1031700_3	0
AMRU_CQ_ACGTCAATCCGAATGT	AMRU	CQ	2348	PvP01_10_v1_2721_-_PVP01_1031700_3	0
AMRU_CQ_ACGTCAATCTGTCAAG	AMRU	CQ	3854	PvP01_10_v1_2721_-_PVP01_1031700_3	0.274952
AMRU_CQ_ACTATCTAGAGCTGGT	AMRU	CQ	3437	PvP01_10_v1_2721_-_PVP01_1031700_3	0.133369
AMRU_CQ_ACTATCTAGTACGTAA	AMRU	CQ	2124	PvP01_10_v1_2721_-_PVP01_1031700_3	0
AMRU_CQ_ACTATCTAGTGCGTGA	AMRU	CQ	5036	PvP01_10_v1_2721_-_PVP01_1031700_3	0.489077
AMRU_CQ_ACTATCTTCCAGAAGG	AMRU	CQ	2351	PvP01_10_v1_2721_-_PVP01_1031700_3	0
AMRU_CQ_ACTATCTTCCTGCTTG	AMRU	CQ	2876	PvP01_10_v1_2721_-_PVP01_1031700_3	0
AMRU_CQ_ACTATCTTCTTTAGGG	AMRU	CQ	4129	PvP01_10_v1_2721_-_PVP01_1031700_3	0
AMRU_CQ_ACTGAACAGCTCTCGG	AMRU	CQ	1712	PvP01_10_v1_2721_-_PVP01_1031700_3	0
AMRU_CQ_ACTGAACAGGCAGGTT	AMRU	CQ	3683	PvP01_10_v1_2721_-_PVP01_1031700_3	0
AMRU_CQ_ACTGAACTCGTACGGC	AMRU	CQ	3545	PvP01_10_v1_2721_-_PVP01_1031700_3	0
AMRU_CQ_ACTGAGTAGACCACGA	AMRU	CQ	922	PvP01_10_v1_2721_-_PVP01_1031700_3	0
AMRU_CQ_ACTGAGTAGCTTATCG	AMRU	CQ	1592	PvP01_10_v1_2721_-_PVP01_1031700_3	0
AMRU_CQ_ACTGAGTCAGCCTGTG	AMRU	CQ	1525	PvP01_10_v1_2721_-_PVP01_1031700_3	0
AMRU_CQ_ACTGAGTTCAAGCCTA	AMRU	CQ	1906	PvP01_10_v1_2721_-_PVP01_1031700_3	0
AMRU_CQ_ACTGATGCAGGATCGA	AMRU	CQ	2422	PvP01_10_v1_2721_-_PVP01_1031700_3	0
AMRU_CQ_ACTGATGGTTGTGGCC	AMRU	CQ	2516	PvP01_10_v1_2721_-_PVP01_1031700_3	0
AMRU_CQ_ACTGATGTCATAACCG	AMRU	CQ	2089	PvP01_10_v1_2721_-_PVP01_1031700_3	0
AMRU_CQ_ACTGCTCGTAAGAGAG	AMRU	CQ	1964	PvP01_10_v1_2721_-_PVP01_1031700_3	0
AMRU_CQ_ACTGCTCGTTGTGGCC	AMRU	CQ	2268	PvP01_10_v1_2721_-_PVP01_1031700_3	0
AMRU_CQ_ACTGCTCTCCAAACAC	AMRU	CQ	4417	PvP01_10_v1_2721_-_PVP01_1031700_3	0
AMRU_CQ_ACTGTCCAGTCTTGCA	AMRU	CQ	1153	PvP01_10_v1_2721_-_PVP01_1031700_3	0
AMRU_CQ_ACTGTCCAGTGAAGAG	AMRU	CQ	8544	PvP01_10_v1_2721_-_PVP01_1031700_3	0
AMRU_CQ_ACTGTCCCATTATCTC	AMRU	CQ	3307	PvP01_10_v1_2721_-_PVP01_1031700_3	0.0519778
AMRU_CQ_ACTGTCCGTTATTCTC	AMRU	CQ	1216	PvP01_10_v1_2721_-_PVP01_1031700_3	0
AMRU_CQ_ACTGTCCGTTCGTCTC	AMRU	CQ	2936	PvP01_10_v1_2721_-_PVP01_1031700_3	0.0992113
AMRU_CQ_ACTTACTAGTGTTTGC	AMRU	CQ	1475	PvP01_10_v1_2721_-_PVP01_1031700_3	0
AMRU_CQ_ACTTACTCAGTGGGAT	AMRU	CQ	1920	PvP01_10_v1_2721_-_PVP01_1031700_3	0
AMRU_CQ_ACTTACTGTTCCTCCA	AMRU	CQ	1151	PvP01_10_v1_2721_-_PVP01_1031700_3	0
AMRU_CQ_ACTTGTTCAGGGTTAG	AMRU	CQ	4029	PvP01_10_v1_2721_-_PVP01_1031700_3	0
AMRU_CQ_ACTTGTTGTAGAGGAA	AMRU	CQ	2173	PvP01_10_v1_2721_-_PVP01_1031700_3	0
AMRU_CQ_ACTTGTTTCCGTACAA	AMRU	CQ	2032	PvP01_10_v1_2721_-_PVP01_1031700_3	0
AMRU_CQ_ACTTGTTTCGCACTCT	AMRU	CQ	2479	PvP01_10_v1_2721_-_PVP01_1031700_3	0
AMRU_CQ_ACTTTCAAGAAACCTA	AMRU	CQ	2227	PvP01_10_v1_2721_-_PVP01_1031700_3	0
AMRU_CQ_ACTTTCAGTGCGGTAA	AMRU	CQ	2269	PvP01_10_v1_2721_-_PVP01_1031700_3	0
AMRU_CQ_ACTTTCATCCGGGTGT	AMRU	CQ	2864	PvP01_10_v1_2721_-_PVP01_1031700_3	0
AMRU_CQ_AGAATAGAGACAGACC	AMRU	CQ	2753	PvP01_10_v1_2721_-_PVP01_1031700_3	0
AMRU_CQ_AGAATAGAGTCCATAC	AMRU	CQ	3101	PvP01_10_v1_2721_-_PVP01_1031700_3	0.0560287
AMRU_CQ_AGAATAGCAGGTCTCG	AMRU	CQ	1729	PvP01_10_v1_2721_-_PVP01_1031700_3	0
AMRU_CQ_AGAATAGCATGGGAAC	AMRU	CQ	1011	PvP01_10_v1_2721_-_PVP01_1031700_3	0
AMRU_CQ_AGAATAGCATGGTTGT	AMRU	CQ	1201	PvP01_10_v1_2721_-_PVP01_1031700_3	0
AMRU_CQ_AGAATAGGTAAACACA	AMRU	CQ	3621	PvP01_10_v1_2721_-_PVP01_1031700_3	0.689536
AMRU_CQ_AGAATAGTCCCTCAGT	AMRU	CQ	1430	PvP01_10_v1_2721_-_PVP01_1031700_3	0
AMRU_CQ_AGAATAGTCGATAGAA	AMRU	CQ	4483	PvP01_10_v1_2721_-_PVP01_1031700_3	0.243962
AMRU_CQ_AGACGTTAGATCGATA	AMRU	CQ	1826	PvP01_10_v1_2721_-_PVP01_1031700_3	0
AMRU_CQ_AGACGTTGTAAACACA	AMRU	CQ	1390	PvP01_10_v1_2721_-_PVP01_1031700_3	0
AMRU_CQ_AGACGTTGTAGTACCT	AMRU	CQ	1701	PvP01_10_v1_2721_-_PVP01_1031700_3	0
AMRU_CQ_AGAGCGAAGGACTGGT	AMRU	CQ	1558	PvP01_10_v1_2721_-_PVP01_1031700_3	0
AMRU_CQ_AGAGCGACAATGGACG	AMRU	CQ	2420	PvP01_10_v1_2721_-_PVP01_1031700_3	0
AMRU_CQ_AGAGCGACACGTTGGC	AMRU	CQ	4933	PvP01_10_v1_2721_-_PVP01_1031700_3	0.210713
AMRU_CQ_AGAGCGACAGCTTAAC	AMRU	CQ	1499	PvP01_10_v1_2721_-_PVP01_1031700_3	0
AMRU_CQ_AGAGCGATCAACTCTT	AMRU	CQ	3354	PvP01_10_v1_2721_-_PVP01_1031700_3	0
AMRU_CQ_AGAGCGATCCTAGAAC	AMRU	CQ	1796	PvP01_10_v1_2721_-_PVP01_1031700_3	0
AMRU_CQ_AGAGCTTCACGAAATA	AMRU	CQ	2320	PvP01_10_v1_2721_-_PVP01_1031700_3	0
AMRU_CQ_AGAGCTTCAGCCTTTC	AMRU	CQ	2852	PvP01_10_v1_2721_-_PVP01_1031700_3	0.0889759
AMRU_CQ_AGAGCTTGTACTCTCC	AMRU	CQ	3003	PvP01_10_v1_2721_-_PVP01_1031700_3	0
AMRU_CQ_AGAGCTTTCAACGGGA	AMRU	CQ	2249	PvP01_10_v1_2721_-_PVP01_1031700_3	0
AMRU_CQ_AGAGCTTTCGTGGTCG	AMRU	CQ	2276	PvP01_10_v1_2721_-_PVP01_1031700_3	0
AMRU_CQ_AGAGTGGAGACTAGAT	AMRU	CQ	2788	PvP01_10_v1_2721_-_PVP01_1031700_3	0
AMRU_CQ_AGAGTGGCAGTATCTG	AMRU	CQ	1385	PvP01_10_v1_2721_-_PVP01_1031700_3	0
AMRU_CQ_AGAGTGGGTGAGCGAT	AMRU	CQ	3575	PvP01_10_v1_2721_-_PVP01_1031700_3	0.0558129
AMRU_CQ_AGAGTGGGTGGTAACG	AMRU	CQ	1577	PvP01_10_v1_2721_-_PVP01_1031700_3	0
AMRU_CQ_AGAGTGGTCAGAGGTG	AMRU	CQ	2839	PvP01_10_v1_2721_-_PVP01_1031700_3	0
AMRU_CQ_AGATCTGAGTATTGGA	AMRU	CQ	3194	PvP01_10_v1_2721_-_PVP01_1031700_3	0
AMRU_CQ_AGATCTGTCCAAACAC	AMRU	CQ	1438	PvP01_10_v1_2721_-_PVP01_1031700_3	0
AMRU_CQ_AGATTGCTCTTGCAAG	AMRU	CQ	4234	PvP01_10_v1_2721_-_PVP01_1031700_3	0
AMRU_CQ_AGCAGCCAGTAGATGT	AMRU	CQ	3452	PvP01_10_v1_2721_-_PVP01_1031700_3	0.176694
AMRU_CQ_AGCAGCCAGTCGAGTG	AMRU	CQ	2663	PvP01_10_v1_2721_-_PVP01_1031700_3	0
AMRU_CQ_AGCAGCCTCCCACTTG	AMRU	CQ	4469	PvP01_10_v1_2721_-_PVP01_1031700_3	0.158303
AMRU_CQ_AGCATACGTAGAAGGA	AMRU	CQ	4092	PvP01_10_v1_2721_-_PVP01_1031700_3	0
AMRU_CQ_AGCATACGTCCGACGT	AMRU	CQ	1721	PvP01_10_v1_2721_-_PVP01_1031700_3	0
AMRU_CQ_AGCATACTCAAAGACA	AMRU	CQ	2487	PvP01_10_v1_2721_-_PVP01_1031700_3	0
AMRU_CQ_AGCATACTCGCTGATA	AMRU	CQ	2166	PvP01_10_v1_2721_-_PVP01_1031700_3	0
AMRU_CQ_AGCCTAACACCGTTGG	AMRU	CQ	2362	PvP01_10_v1_2721_-_PVP01_1031700_3	0
AMRU_CQ_AGCGGTCAGCGTCTAT	AMRU	CQ	1276	PvP01_10_v1_2721_-_PVP01_1031700_3	0
AMRU_CQ_AGCGGTCAGCTAGTCT	AMRU	CQ	3092	PvP01_10_v1_2721_-_PVP01_1031700_3	0.0285103
AMRU_CQ_AGCGGTCCACTGTCGG	AMRU	CQ	3053	PvP01_10_v1_2721_-_PVP01_1031700_3	0
AMRU_CQ_AGCGGTCTCCCGACTT	AMRU	CQ	3274	PvP01_10_v1_2721_-_PVP01_1031700_3	0
AMRU_CQ_AGCGTATAGGCAAAGA	AMRU	CQ	4094	PvP01_10_v1_2721_-_PVP01_1031700_3	0.0604887
AMRU_CQ_AGCGTATGTAGCTGCC	AMRU	CQ	1888	PvP01_10_v1_2721_-_PVP01_1031700_3	0
AMRU_CQ_AGCGTATGTTGGTTTG	AMRU	CQ	2262	PvP01_10_v1_2721_-_PVP01_1031700_3	0
AMRU_CQ_AGCGTCGAGGCATTGG	AMRU	CQ	8119	PvP01_10_v1_2721_-_PVP01_1031700_3	0
AMRU_CQ_AGCGTCGGTCACAAGG	AMRU	CQ	2140	PvP01_10_v1_2721_-_PVP01_1031700_3	0
AMRU_CQ_AGCGTCGTCTGGTATG	AMRU	CQ	3841	PvP01_10_v1_2721_-_PVP01_1031700_3	0.16756
AMRU_CQ_AGCTCCTAGCTAAACA	AMRU	CQ	2935	PvP01_10_v1_2721_-_PVP01_1031700_3	0
AMRU_CQ_AGCTCCTAGGGAGTAA	AMRU	CQ	2435	PvP01_10_v1_2721_-_PVP01_1031700_3	0
AMRU_CQ_AGCTCCTTCCACTCCA	AMRU	CQ	3336	PvP01_10_v1_2721_-_PVP01_1031700_3	0
AMRU_CQ_AGCTCCTTCCCGGATG	AMRU	CQ	3836	PvP01_10_v1_2721_-_PVP01_1031700_3	0.100422
AMRU_CQ_AGCTCCTTCGATGAGG	AMRU	CQ	3021	PvP01_10_v1_2721_-_PVP01_1031700_3	0
AMRU_CQ_AGCTCCTTCGGCCGAT	AMRU	CQ	4688	PvP01_10_v1_2721_-_PVP01_1031700_3	0.0775194
AMRU_CQ_AGCTCTCAGGATTCGG	AMRU	CQ	3462	PvP01_10_v1_2721_-_PVP01_1031700_3	0
AMRU_CQ_AGCTCTCCAGTTAACC	AMRU	CQ	2175	PvP01_10_v1_2721_-_PVP01_1031700_3	0
AMRU_CQ_AGCTCTCTCGAGGTAG	AMRU	CQ	878	PvP01_10_v1_2721_-_PVP01_1031700_3	0
AMRU_CQ_AGCTTGAAGAAGAAGC	AMRU	CQ	4391	PvP01_10_v1_2721_-_PVP01_1031700_3	0.276182
AMRU_CQ_AGCTTGAAGAGCTATA	AMRU	CQ	2337	PvP01_10_v1_2721_-_PVP01_1031700_3	0
AMRU_CQ_AGCTTGAGTCTAGAGG	AMRU	CQ	8356	PvP01_10_v1_2721_-_PVP01_1031700_3	0.11393
AMRU_CQ_AGCTTGATCTGGTGTA	AMRU	CQ	3013	PvP01_10_v1_2721_-_PVP01_1031700_3	0.0413394
AMRU_CQ_AGGCCACCAGCATGAG	AMRU	CQ	1978	PvP01_10_v1_2721_-_PVP01_1031700_3	0
AMRU_CQ_AGGCCACGTCATTAGC	AMRU	CQ	3128	PvP01_10_v1_2721_-_PVP01_1031700_3	0
AMRU_CQ_AGGCCACGTCGACTAT	AMRU	CQ	1876	PvP01_10_v1_2721_-_PVP01_1031700_3	0
AMRU_CQ_AGGCCACTCCCAAGAT	AMRU	CQ	3802	PvP01_10_v1_2721_-_PVP01_1031700_3	0
AMRU_CQ_AGGCCGTAGTGCCAGA	AMRU	CQ	8205	PvP01_10_v1_2721_-_PVP01_1031700_3	0
AMRU_CQ_AGGCCGTAGTTAAGTG	AMRU	CQ	2720	PvP01_10_v1_2721_-_PVP01_1031700_3	0
AMRU_CQ_AGGCCGTGTCTGATTG	AMRU	CQ	3475	PvP01_10_v1_2721_-_PVP01_1031700_3	0.0832432
AMRU_CQ_AGGCCGTGTTAGATGA	AMRU	CQ	3458	PvP01_10_v1_2721_-_PVP01_1031700_3	0
AMRU_CQ_AGGCCGTTCCTAGTGA	AMRU	CQ	1890	PvP01_10_v1_2721_-_PVP01_1031700_3	0
AMRU_CQ_AGGGAGTCACACAGAG	AMRU	CQ	4511	PvP01_10_v1_2721_-_PVP01_1031700_3	0.0863856
AMRU_CQ_AGGGATGAGATGGCGT	AMRU	CQ	3834	PvP01_10_v1_2721_-_PVP01_1031700_3	0.148126
AMRU_CQ_AGGGATGAGTCTCCTC	AMRU	CQ	4036	PvP01_10_v1_2721_-_PVP01_1031700_3	0
AMRU_CQ_AGGGATGCACGCGAAA	AMRU	CQ	2800	PvP01_10_v1_2721_-_PVP01_1031700_3	0
AMRU_CQ_AGGGATGCAGCTATTG	AMRU	CQ	3445	PvP01_10_v1_2721_-_PVP01_1031700_3	0.22627
AMRU_CQ_AGGGATGGTGGTTTCA	AMRU	CQ	1809	PvP01_10_v1_2721_-_PVP01_1031700_3	0
AMRU_CQ_AGGGTGAAGAAACGAG	AMRU	CQ	3115	PvP01_10_v1_2721_-_PVP01_1031700_3	0.055457
AMRU_CQ_AGGGTGAAGAGCTTCT	AMRU	CQ	1934	PvP01_10_v1_2721_-_PVP01_1031700_3	0
AMRU_CQ_AGGGTGAAGCTAAGAT	AMRU	CQ	2520	PvP01_10_v1_2721_-_PVP01_1031700_3	0
AMRU_CQ_AGGGTGACAATCCGAT	AMRU	CQ	4329	PvP01_10_v1_2721_-_PVP01_1031700_3	0.127146
[truncated: 7,216 more rows]
